# Supplementary material for: Dual RNA-Sequencing Analysis of Resistant (Pinus pinea) and Susceptible (Pinus radiata) Hosts during Fusarium circinatum Challenge
Source: Int J Mol Sci. 2021 May 15;22(10):5231. doi: 10.3390/ijms22105231 (PMC8156185; doi:10.3390/ijms22105231)
Supplement: Supplementary file 1 [file ijms-22-05231-s001.zip › Supplementary_Figures.pdf]

## Supplementary Material

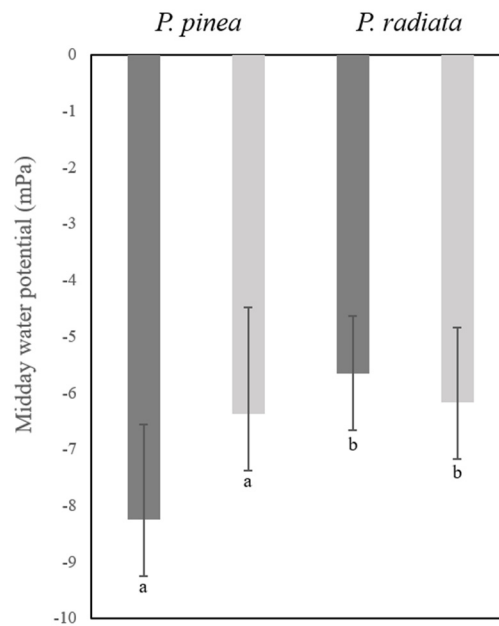

**Figure S1.** Water potential of *P. pinea* and *P. radiata* inoculated with *F. circinatum* (dark grey) and controls (light grey). Error bars show the standard deviation. Different letters indicate significant differences (ANOVA,  $p < 0.05$ ).

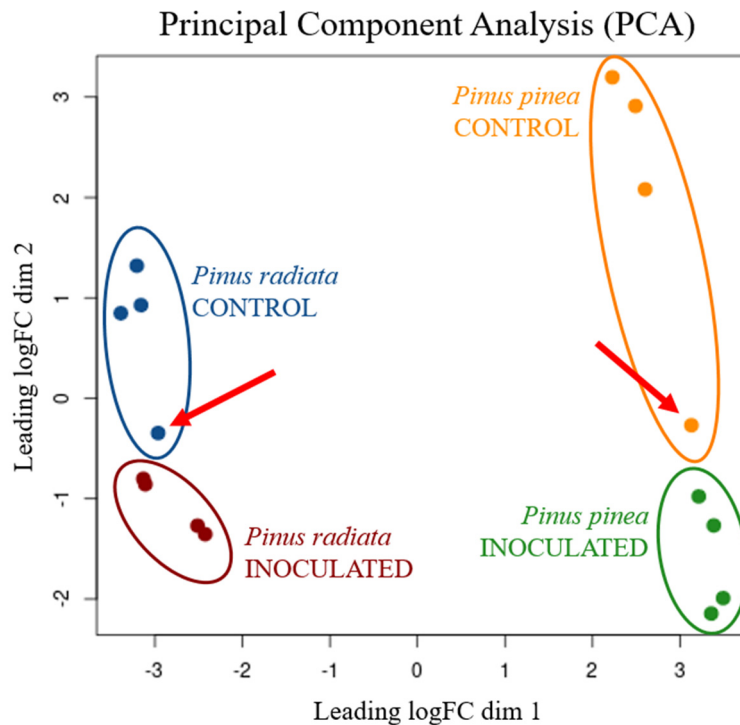

**Figure S2.** Two-dimensional scatterplot of the principal component analyses (PCA) for *Pinus radiata* and *P. pinea* where distances approximate the typical log<sub>2</sub> fold changes between the samples. Red arrows represent indicate the discarded samples for the downstream analysis.

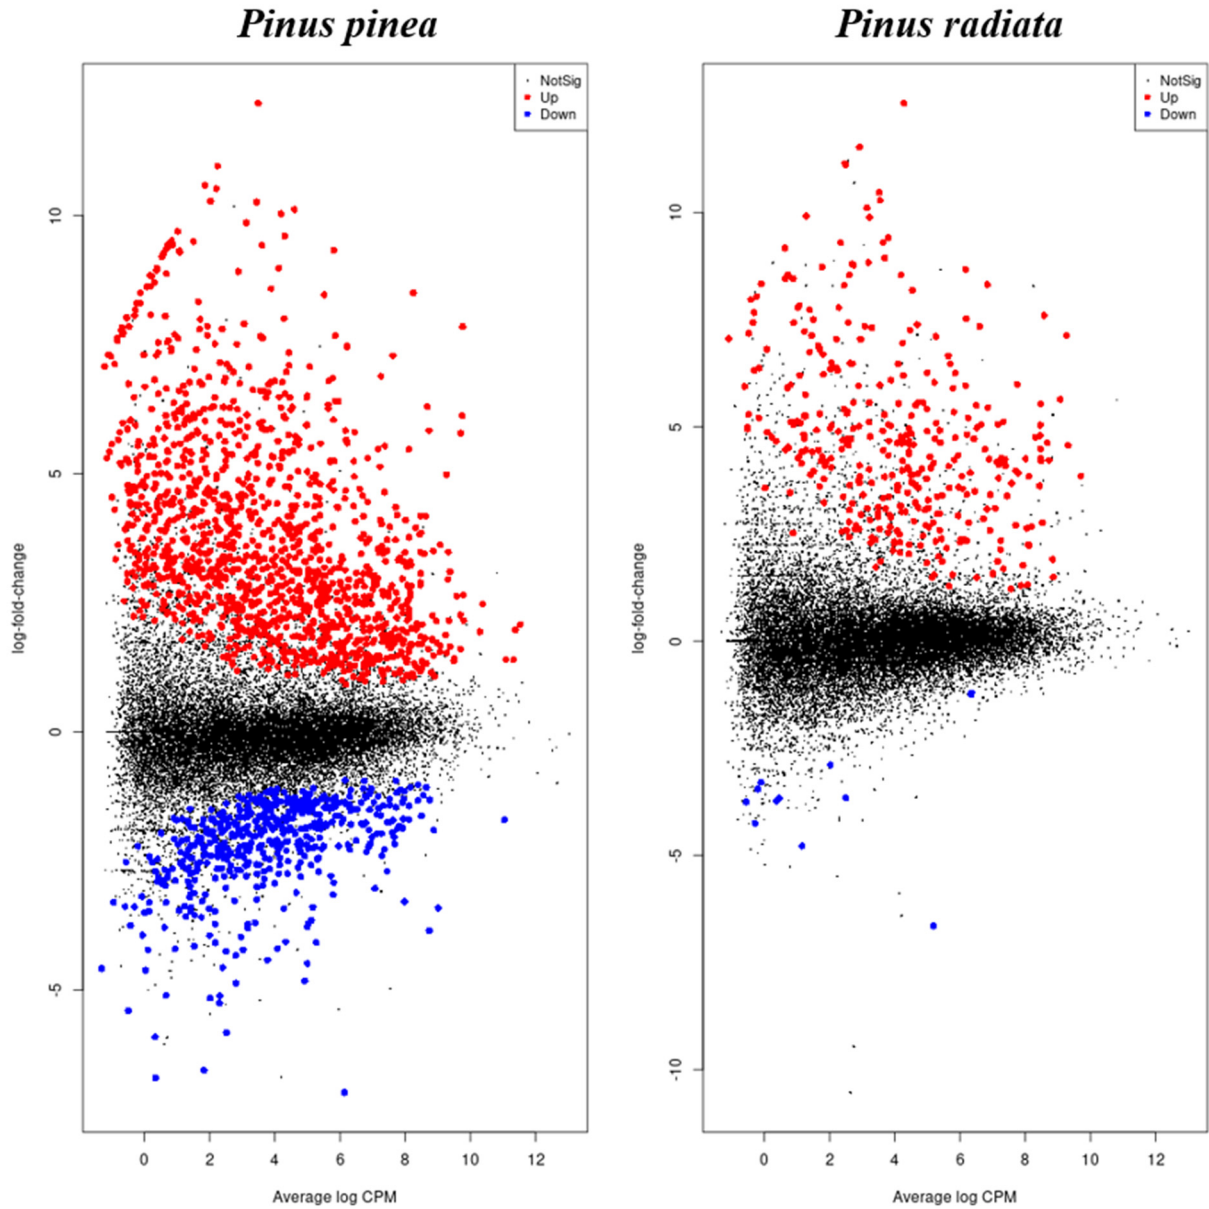

**Figure S3.** Differential gene expression was analyzed using the “EdgeR” R package and plotted as a MA plot. The log<sub>2</sub> fold change of the normalized gene expression between inoculated and control treatments of both pine species, is represented on the y-axis; and the average log counts per million (CPM) is plotted on the x-axis. Color dots represent the differentially expressed genes: red dots indicate up-regulated genes and blue dots down-regulated genes. Black small dots represent genes with similar expression between treatments.

*Pinus pinea* vs. *Pinus radiata*

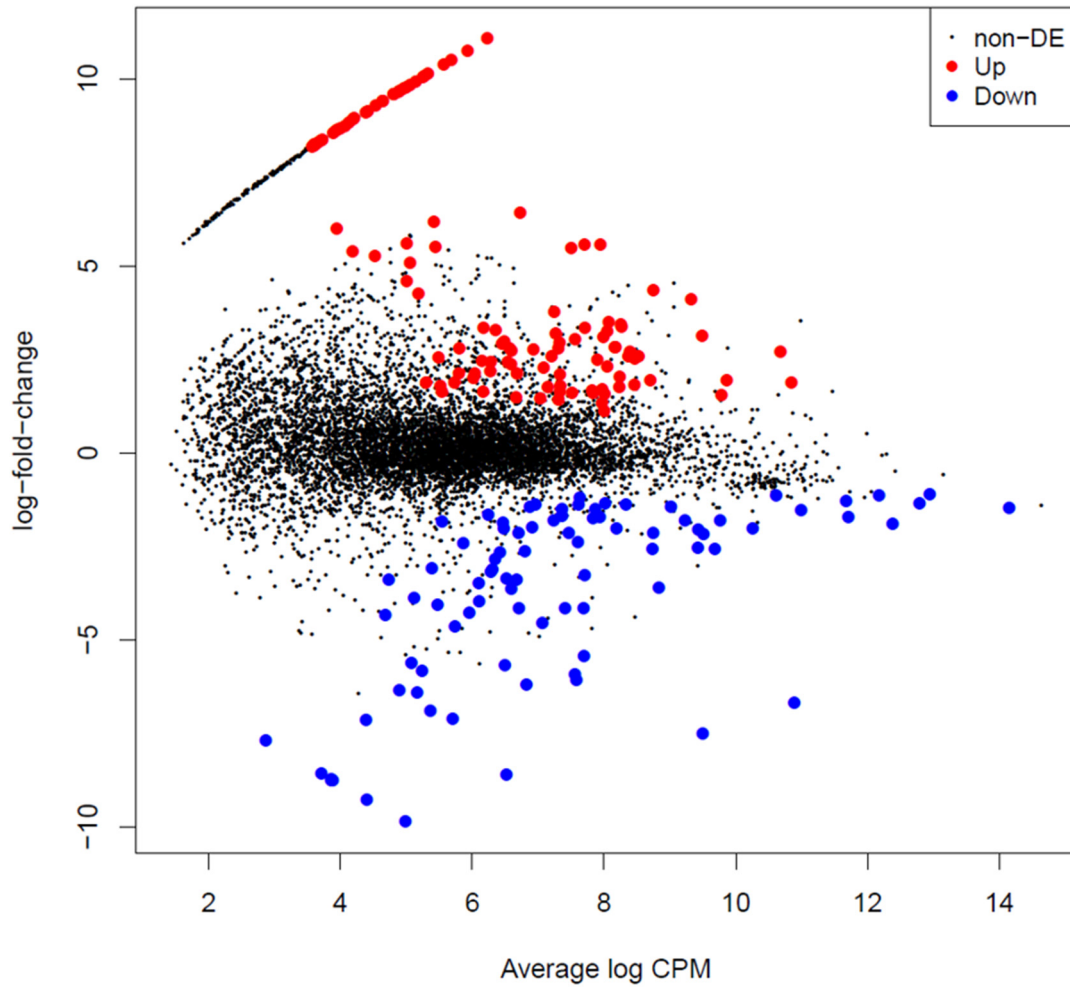

**Figure S4.** Differential gene expression was analyzed using the “EdgeR” R package and plotted as a MA plot. The log<sub>2</sub> fold change of the normalized gene expression of *Fusarium circinatum* infecting *Pinus pinea* in comparison with *P. radiata*, is represented on the y-axis; and the average log counts per million (CPM) is plotted on the x-axis. Color dots represent the differentially expressed genes: red dots indicate up-regulated genes and blue dots down-regulated genes. Black small dots represent fungal genes with similar expression between pine species.
