# Supplementary material for: Dual RNA-Sequencing Analysis of Resistant (Pinus pinea) and Susceptible (Pinus radiata) Hosts during Fusarium circinatum Challenge
Source: Int J Mol Sci. 2021 May 15;22(10):5231. doi: 10.3390/ijms22105231 (PMC8156185; doi:10.3390/ijms22105231)
Supplement: Supplementary file 1 [file ijms-22-05231-s001.zip › Supplementary_Tables.xlsx]

## Sheet: Table S1
	Table S1: Read mapping statistics to the host (Pinus taeda) and the pathogen (Fusarium circinatum) reference genomes
	Treatment	Library ID	Number of Paired Reads	GC(%)	Reads Mapped to Genome*
					Host reference		Pathogen reference
	Pinus radiata
	Mock-inoculated	25PrC12	47835972	44.83	38924130	0.8137	9567.19	0.0002
		36PrC13	49849420	44.53	41075922	0.824	14954.8	0.0003
		62PrC15	60046683	44.52	50619354	0.843	6004.67	0.0001
	Inoculated	18PrI12	54584363	44.95	45463316	0.8329	21287902	0.0039
		37PrI13	43759899	43.8	36495756	0.834	32382325	0.0074
		50PrI14	56335571	44.31	46781058	0.8304	37181477	0.0066
		65PrI15	59578913	43.7	49069193	0.8236	33364191	0.0056
	Pinus pinea
	Mock-inoculated	45PpC14	54939944	43.88	27475466	0.5001	16482	0.0003
		52PpC16	55040014	44.27	29484936	0.5357	11008	0.0002
		9PpC12	49858676	44.4	26524816	0.532	29915.2	0.0006
	Inoculated	30PpI13	55115638	44.67	29624655	0.5375	49052918	0.0089
		40PpI14	45589330	44.65	24280877	0.5326	66104529	0.0145
		46PpI15	47805989	45.07	22899069	0.479	169233201	0.0354
		55PpI16	72377232	45.78	36825536	0.5088	191075892	0.0264
	*Reads mapped in pairs and in broken pairs

## Sheet: Table S2
	Table S2: List of differentially expressed P. pinea genes.
	List of up-regulated P. pinea genes with log2(Fold-change) and corrected p-values (FDR)					List of down-regulated P. pinea genes with log2(Fold-change) and corrected p-values (FDR)
	Transcript ID	log2(Fold-Change)	FDR			Transcript ID	log2(Fold-Change)	FDR
	PITA_07458	3.72315	8.18045e-05			PITA_08882	-4.9199	2.73787e-05
	PITA_34358	3.77626	8.48399e-05			PITA_17070	-4.98104	2.73787e-05
	PITA_44111	2.27667	0.000395828			PITA_28489	-3.5068	3.75364e-05
	PITA_14038	2.31952	0.000399341			PITA_47638	-6.76418	3.96906e-05
	PITA_33047	1.94829	0.000598757			PITA_38468	-9.32591	3.96906e-05
	PITA_32820	3.58904	0.000603183			PITA_02979	-2.40647	3.96906e-05
	PITA_21996	3.15431	0.000603636			PITA_26185	-5.43189	5.7892e-05
	PITA_36371	1.73705	0.000609376			PITA_31270	-6.40425	6.33038e-05
	PITA_15002	1.48293	0.000689648			PITA_41827	-4.24986	6.33038e-05
	PITA_49187	1.92626	0.000689648			PITA_11559	-5.83666	6.33038e-05
	PITA_01157	2.57958	0.000743355			PITA_35369	-4.10253	7.08683e-05
	PITA_36095	2.11964	0.000743355			PITA_47471	-5.97472	7.08683e-05
	PITA_21442	4.81781	0.000853008			PITA_02843	-4.79348	7.24254e-05
	PITA_25780	2.52097	0.000970762			PITA_25897	-2.83851	8.18045e-05
	PITA_37523	4.0653	0.000970762			PITA_28262	-10.115	8.18045e-05
	PITA_25387	2.701	0.000970762			PITA_27375	-3.94645	8.18045e-05
	PITA_37062	2.29849	0.000986236			PITA_11504	-4.68331	8.48399e-05
	PITA_50448	5.90561	0.0010021			PITA_07286	-4.76351	8.48399e-05
	PITA_46322	1.96489	0.00105669			PITA_26300	-5.4283	8.48399e-05
	PITA_31997	1.84688	0.00112772			PITA_27363	-4.17854	8.68317e-05
	PITA_05648	2.21933	0.00112772			PITA_45011	-3.30596	0.000103879
	PITA_13418	2.21328	0.00115578			PITA_07686	-5.84874	0.000110623
	PITA_19208	2.19121	0.00118122			PITA_41232	-6.29418	0.000126481
	PITA_42414	2.79459	0.00120263			PITA_49380	-5.10728	0.000134685
	PITA_13428	2.79039	0.00121349			PITA_35802	-5.62215	0.000149907
	PITA_34783	3.24108	0.00123988			PITA_06277	-5.29159	0.000149907
	PITA_44254	3.84731	0.00128654			PITA_08957	-6.46805	0.000149907
	PITA_45305	2.2622	0.00137899			PITA_30537	-7.06795	0.000151213
	PITA_14133	3.41023	0.00138436			PITA_37076	-4.55738	0.000153002
	PITA_27331	1.967	0.00138436			PITA_45043	-4.18297	0.000153002
	PITA_42873	1.55581	0.00138436			PITA_35157	-6.47161	0.00015649
	PITA_37623	1.70778	0.00139824			PITA_45726	-6.5115	0.000171892
	PITA_14828	1.74478	0.00144491			PITA_17856	-4.17695	0.000171892
	PITA_37954	1.78078	0.00145897			PITA_43412	-2.55891	0.000179205
	PITA_50247	2.50444	0.00150867			PITA_11618	-5.95707	0.000179205
	PITA_27725	2.16505	0.00152838			PITA_37534	-2.9459	0.000182832
	PITA_30012	2.70389	0.00156616			PITA_28815	-4.60841	0.000187895
	PITA_49589	1.66775	0.00161972			PITA_22858	-3.09754	0.000191482
	PITA_18221	1.45943	0.00163699			PITA_09352	-5.66197	0.000201809
	PITA_30954	2.18306	0.00163699			PITA_12400	-8.46422	0.000217196
	PITA_34225	2.57771	0.00165682			PITA_48262	-4.50304	0.000217196
	PITA_47143	2.68183	0.00166222			PITA_30882	-6.03619	0.000217196
	PITA_16884	2.40211	0.00166222			PITA_38094	-5.13923	0.000219601
	PITA_10361	2.3399	0.00166222			PITA_47081	-4.61778	0.000222507
	PITA_09809	1.71766	0.00168046			PITA_32490	-6.59744	0.00024362
	PITA_01067	3.11273	0.00170687			PITA_10781	-3.59552	0.000255598
	PITA_12489	1.50484	0.00173149			PITA_11007	-7.67061	0.000264343
	PITA_39798	1.88602	0.0017594			PITA_19648	-8.91399	0.000264343
	PITA_16644	3.01937	0.00177926			PITA_42288	-6.47308	0.000264343
	PITA_12031	2.79085	0.00188194			PITA_42751	-3.02622	0.000264343
	PITA_33562	2.45063	0.00200024			PITA_23807	-6.7885	0.000264932
	PITA_14052	1.38686	0.00201762			PITA_42995	-2.70763	0.000264932
	PITA_07398	2.57519	0.00204587			PITA_24456	-7.33962	0.000264932
	PITA_50739	1.44063	0.00207557			PITA_24601	-4.18996	0.000282721
	PITA_12243	3.28385	0.00207557			PITA_03438	-5.30268	0.000282721
	PITA_28884	2.89313	0.00221218			PITA_30077	-3.73424	0.000282721
	PITA_33980	2.25685	0.00228039			PITA_18936	-3.61818	0.000282721
	PITA_33633	2.5867	0.00231359			PITA_45803	-6.40205	0.000282721
	PITA_27702	2.20736	0.00238861			PITA_09129	-3.19364	0.000282721
	PITA_08856	4.32769	0.00243557			PITA_27995	-6.96728	0.000282721
	PITA_30900	3.96926	0.00244857			PITA_33140	-8.98183	0.000282721
	PITA_49359	2.65518	0.00245222			PITA_30170	-3.08878	0.000282721
	PITA_44784	2.79005	0.00245222			PITA_41407	-6.17946	0.000282721
	PITA_06804	2.5644	0.00245875			PITA_17325	-3.30387	0.000282721
	PITA_24529	1.80724	0.00253513			PITA_44378	-6.97037	0.000286968
	PITA_36414	2.97606	0.00254351			PITA_24676	-4.35395	0.0002996
	PITA_36892	1.43418	0.00255001			PITA_29940	-6.8853	0.000304028
	PITA_27246	2.80689	0.00257019			PITA_38420	-3.2924	0.000308184
	PITA_32729	2.0482	0.00258277			PITA_44646	-6.28975	0.000329176
	PITA_18929	2.21109	0.00258277			PITA_47467	-3.84011	0.000329176
	PITA_12973	1.9104	0.00261639			PITA_09084	-6.79481	0.000334412
	PITA_47765	2.01652	0.00262331			PITA_07523	-3.34363	0.000336219
	PITA_18458	4.0789	0.00266804			PITA_39027	-6.33322	0.000336219
	PITA_22362	2.19724	0.00269563			PITA_44205	-9.59956	0.000336219
	PITA_22237	1.87954	0.00273739			PITA_03602	-6.7215	0.000336219
	PITA_51042	2.25922	0.00274408			PITA_42596	-2.47646	0.000336219
	PITA_13033	1.9183	0.00287565			PITA_22445	-7.46346	0.000336219
	PITA_04212	5.82236	0.00287783			PITA_20502	-4.94365	0.000336219
	PITA_09762	3.78554	0.00290138			PITA_03190	-4.37954	0.000336219
	PITA_21476	2.44603	0.00295888			PITA_27469	-7.099	0.000336219
	PITA_09750	2.37029	0.00302022			PITA_30063	-2.79821	0.000336219
	PITA_08316	1.42861	0.0030266			PITA_47390	-7.04383	0.000336219
	PITA_03371	2.12792	0.00309324			PITA_39845	-3.49	0.000336219
	PITA_02105	2.35945	0.0031163			PITA_00216	-6.04397	0.000336219
	PITA_16826	1.65445	0.00315642			PITA_07582	-4.17587	0.000336219
	PITA_44611	1.87811	0.00327703			PITA_04457	-2.94065	0.000336219
	PITA_11042	2.66946	0.00328904			PITA_05412	-4.75729	0.000340087
	PITA_31675	1.80653	0.00328904			PITA_31344	-5.53	0.00035155
	PITA_49902	2.17737	0.00335012			PITA_25260	-6.54806	0.00035155
	PITA_03427	1.59162	0.00336147			PITA_19448	-3.20211	0.00035155
	PITA_20463	1.98544	0.00346271			PITA_38145	-2.87511	0.000355517
	PITA_06503	5.25451	0.0034857			PITA_10571	-3.11386	0.000355517
	PITA_08496	2.1443	0.0034868			PITA_03001	-5.9362	0.000355517
	PITA_27427	2.21238	0.00352159			PITA_33118	-6.69842	0.000359165
	PITA_39099	1.97519	0.00355412			PITA_49432	-5.4083	0.000359165
	PITA_15025	2.54475	0.00356036			PITA_12330	-6.96753	0.000359165
	PITA_34142	2.36195	0.00367265			PITA_22855	-6.24578	0.000359165
	PITA_19127	2.44973	0.0037488			PITA_01809	-2.63225	0.000359165
	PITA_24482	5.1555	0.00382952			PITA_14158	-7.06571	0.000359165
	PITA_20654	4.08518	0.00395604			PITA_19822	-6.2484	0.000359165
	PITA_42379	2.44059	0.00412162			PITA_07261	-7.40287	0.000359165
	PITA_22111	2.19487	0.00419812			PITA_21009	-5.23875	0.000359165
	PITA_51474	1.7628	0.00419812			PITA_41113	-7.51469	0.000359165
	PITA_21053	2.14162	0.00424467			PITA_37728	-6.23396	0.000359165
	PITA_27474	2.58729	0.00424481			PITA_50059	-4.48527	0.000359165
	PITA_12299	4.48555	0.00425702			PITA_32538	-4.91435	0.00036141
	PITA_18537	1.86463	0.00425841			PITA_24968	-10.5154	0.00036796
	PITA_49733	1.88065	0.00427091			PITA_00697	-9.86023	0.000373545
	PITA_00997	2.22252	0.00434185			PITA_43126	-2.46612	0.000373545
	PITA_01298	1.29148	0.00436286			PITA_08396	-4.87866	0.000373545
	PITA_47550	2.90563	0.00444225			PITA_15514	-6.79368	0.000373545
	PITA_14867	2.17982	0.00456042			PITA_34642	-6.18847	0.000377028
	PITA_16052	3.42223	0.00479454			PITA_12411	-10.261	0.000385834
	PITA_28831	3.02948	0.00480738			PITA_22838	-3.63391	0.00038752
	PITA_11562	1.86602	0.00482141			PITA_02255	-2.14532	0.00038752
	PITA_40067	2.13874	0.00482221			PITA_24383	-3.54693	0.000388345
	PITA_38325	1.82007	0.00494294			PITA_30632	-3.15555	0.00038841
	PITA_51257	1.77272	0.00494369			PITA_02274	-2.80041	0.00038841
	PITA_38925	1.8737	0.00496416			PITA_10989	-4.39722	0.000402936
	PITA_34474	2.27041	0.00501241			PITA_23708	-9.42016	0.000408663
	PITA_40568	1.82913	0.00535746			PITA_12182	-2.7326	0.00041338
	PITA_38987	2.70289	0.0054533			PITA_14907	-4.27606	0.00041338
	PITA_32544	3.12489	0.00547457			PITA_31006	-5.03957	0.000418067
	PITA_05491	4.41765	0.00553156			PITA_07477	-1.69904	0.000450893
	PITA_25464	1.25705	0.00562061			PITA_27237	-6.84547	0.000450893
	PITA_51605	2.4633	0.00562061			PITA_20515	-5.47966	0.000453135
	PITA_30393	1.88747	0.00563804			PITA_41993	-4.10237	0.000453788
	PITA_14989	4.86452	0.00573061			PITA_47176	-6.85331	0.000453788
	PITA_02391	1.657	0.00573155			PITA_11040	-3.85385	0.000479495
	PITA_16042	1.72858	0.00573155			PITA_41619	-9.38373	0.000481366
	PITA_16542	4.24704	0.00578088			PITA_51422	-2.81236	0.000486928
	PITA_11035	1.76014	0.00579254			PITA_50025	-3.77018	0.000501657
	PITA_48230	2.39005	0.0060456			PITA_26161	-2.62779	0.000515857
	PITA_20102	2.394	0.00607379			PITA_39100	-5.42501	0.000515857
	PITA_26807	3.80299	0.00623889			PITA_27747	-2.4419	0.000515857
	PITA_11266	5.10198	0.0063973			PITA_23557	-6.74388	0.000515857
	PITA_41208	1.86189	0.00640602			PITA_32234	-3.53919	0.000515857
	PITA_16863	1.27845	0.00642744			PITA_42452	-4.34124	0.000518405
	PITA_11649	1.74559	0.0064732			PITA_46450	-4.01776	0.000527456
	PITA_02461	2.46489	0.0065655			PITA_41436	-4.58163	0.000535161
	PITA_22893	2.14545	0.00657373			PITA_21199	-3.10508	0.000535161
	PITA_08213	1.89703	0.00662249			PITA_35833	-10.9594	0.000535161
	PITA_27147	4.56459	0.00666293			PITA_02153	-4.01443	0.000541057
	PITA_10538	1.72044	0.00681767			PITA_33802	-1.62183	0.000543013
	PITA_16486	1.40949	0.00685903			PITA_01990	-2.89942	0.00056159
	PITA_03869	1.84787	0.00697941			PITA_26929	-4.89392	0.000571436
	PITA_24966	2.064	0.00710989			PITA_18451	-5.30256	0.000571436
	PITA_09678	1.56856	0.0071214			PITA_49759	-2.59931	0.000571436
	PITA_00791	2.25583	0.00723764			PITA_16276	-5.5431	0.000571436
	PITA_43483	1.65251	0.00784851			PITA_25564	-2.18361	0.000571436
	PITA_02071	2.64388	0.00793663			PITA_49345	-7.62696	0.000571436
	PITA_06759	1.6569	0.00797045			PITA_43247	-3.71758	0.000571436
	PITA_13226	1.98157	0.00798557			PITA_02646	-7.62048	0.000571674
	PITA_16479	2.30859	0.00798557			PITA_33662	-6.46952	0.000573394
	PITA_08105	1.28591	0.00802772			PITA_51507	-6.77356	0.000573394
	PITA_13080	2.88045	0.00812924			PITA_02933	-6.76612	0.000598757
	PITA_44007	1.54154	0.00814006			PITA_30691	-2.83619	0.000598757
	PITA_48490	2.14556	0.00817143			PITA_11995	-2.97931	0.000609376
	PITA_40935	4.58184	0.0082757			PITA_02495	-4.34125	0.000609376
	PITA_15341	4.19555	0.00832886			PITA_29927	-4.7177	0.000609376
	PITA_14415	1.75145	0.00837756			PITA_09847	-5.75022	0.000617751
	PITA_22380	1.561	0.00838431			PITA_36678	-6.64265	0.000617751
	PITA_20035	2.74386	0.00838869			PITA_00967	-2.85868	0.000617751
	PITA_33030	1.30318	0.00870481			PITA_02900	-4.17435	0.000630458
	PITA_29368	1.59687	0.00870481			PITA_48118	-9.41887	0.000630458
	PITA_15023	2.11561	0.00872855			PITA_21557	-5.59789	0.000630458
	PITA_37081	1.75664	0.00876437			PITA_21743	-5.79339	0.000630458
	PITA_33223	2.88092	0.00876771			PITA_25910	-4.86845	0.000630458
	PITA_12000	1.62681	0.00876771			PITA_39670	-3.12734	0.000635341
	PITA_13580	2.16731	0.00878628			PITA_49166	-1.82458	0.000638508
	PITA_21514	2.01257	0.00882836			PITA_43866	-1.59621	0.000638508
	PITA_12150	1.74467	0.00892188			PITA_35996	-1.86048	0.000638508
	PITA_01801	2.40083	0.00905045			PITA_08715	-3.71978	0.000638508
	PITA_28836	3.00296	0.00914924			PITA_31636	-4.13086	0.000647261
	PITA_39940	1.98612	0.00930652			PITA_50148	-3.22751	0.000659034
	PITA_48580	6.55469	0.0095993			PITA_14101	-4.36844	0.000659034
	PITA_32645	2.81019	0.00964292			PITA_06604	-2.44152	0.000662466
	PITA_48778	2.22429	0.0097012			PITA_03626	-6.03965	0.000678319
	PITA_51617	1.32755	0.00974278			PITA_14664	-4.38492	0.000688268
	PITA_18155	2.03687	0.00986916			PITA_40699	-3.7104	0.000688268
	PITA_46307	1.76371	0.00987214			PITA_06378	-5.72374	0.000688268
	PITA_12958	1.90073	0.00989674			PITA_45373	-5.14821	0.000689334
	PITA_26590	2.09352	0.010201			PITA_25644	-1.52611	0.000689648
	PITA_35759	2.72164	0.0102579			PITA_20021	-1.42455	0.000689648
	PITA_30879	1.02451	0.0102771			PITA_21810	-7.37241	0.000689648
	PITA_37608	1.40324	0.0102867			PITA_18302	-9.41042	0.000689648
	PITA_04764	1.82033	0.0102894			PITA_35728	-3.53305	0.000689648
	PITA_35956	2.73933	0.0103257			PITA_20287	-7.85392	0.000689648
	PITA_16446	2.6953	0.0103763			PITA_00448	-9.51283	0.000698833
	PITA_20648	2.63062	0.0105249			PITA_06706	-4.35403	0.000698833
	PITA_15055	2.25269	0.0108029			PITA_00561	-7.03197	0.00070132
	PITA_50112	1.15952	0.0108151			PITA_22155	-2.90796	0.000706579
	PITA_47805	1.48518	0.0108151			PITA_18094	-5.2454	0.000706579
	PITA_35882	2.03648	0.0109382			PITA_40231	-2.75089	0.000711911
	PITA_47551	2.2369	0.0109781			PITA_04658	-4.28034	0.000712761
	PITA_39559	2.36164	0.0109952			PITA_34712	-6.01704	0.000712761
	PITA_38895	1.94678	0.0110173			PITA_10435	-3.90299	0.000717687
	PITA_13235	2.10479	0.0110462			PITA_36950	-6.07205	0.000717687
	PITA_47736	1.46615	0.0111162			PITA_36691	-2.24604	0.000717687
	PITA_49695	2.43642	0.0111967			PITA_20123	-5.75323	0.000719087
	PITA_06054	2.23653	0.0112644			PITA_04854	-10.2748	0.000740657
	PITA_32167	2.08991	0.0114069			PITA_35462	-3.18292	0.000741707
	PITA_35228	1.24252	0.0114112			PITA_41690	-2.62447	0.000741707
	PITA_46140	1.60549	0.0115523			PITA_11025	-1.61842	0.000743355
	PITA_31970	2.0181	0.0116672			PITA_42372	-9.20173	0.000743355
	PITA_07307	2.28746	0.0117281			PITA_48357	-7.84654	0.000744656
	PITA_18774	1.1583	0.0117282			PITA_43495	-4.91867	0.00074888
	PITA_40996	1.3764	0.0120044			PITA_22966	-5.5652	0.00074888
	PITA_07962	1.94898	0.0122866			PITA_42736	-3.37331	0.00074888
	PITA_17414	2.07742	0.012415			PITA_25342	-3.29163	0.000749861
	PITA_28751	2.01509	0.0126125			PITA_35170	-3.94017	0.000775619
	PITA_02440	2.46099	0.0126125			PITA_10220	-4.26596	0.000775759
	PITA_03818	2.38733	0.0126418			PITA_24570	-7.29133	0.000776428
	PITA_09484	1.76076	0.0126418			PITA_25968	-4.51966	0.000793599
	PITA_32363	1.52737	0.0126418			PITA_38627	-2.10541	0.000793622
	PITA_29321	1.74557	0.012697			PITA_48730	-3.32502	0.000793622
	PITA_13203	1.80198	0.0128192			PITA_13570	-2.06835	0.000799426
	PITA_12952	3.3879	0.0129577			PITA_15074	-3.15044	0.000801014
	PITA_27328	1.67315	0.0130623			PITA_26302	-3.73612	0.000807097
	PITA_13220	2.98014	0.0130885			PITA_00797	-2.21171	0.000815105
	PITA_51542	2.52708	0.0131648			PITA_35518	-5.94509	0.000820903
	PITA_22915	1.66093	0.0131868			PITA_14232	-1.78046	0.000836894
	PITA_11422	1.65082	0.0133764			PITA_51111	-4.30872	0.000836894
	PITA_07368	1.75948	0.0134419			PITA_09890	-6.12311	0.000850613
	PITA_03044	1.8596	0.0137497			PITA_10371	-4.16181	0.000853008
	PITA_01969	2.18427	0.0137981			PITA_43975	-5.95159	0.000853008
	PITA_28902	2.65455	0.0138245			PITA_08282	-7.66132	0.000853008
	PITA_20511	1.52741	0.0138733			PITA_04179	-2.26699	0.000854409
	PITA_18479	2.43962	0.0138934			PITA_44642	-2.98713	0.000872551
	PITA_02468	1.29723	0.0139223			PITA_20670	-5.53583	0.000902259
	PITA_22170	1.97104	0.0139786			PITA_32240	-4.73916	0.000902625
	PITA_28855	2.26652	0.0142011			PITA_50130	-4.54477	0.000955455
	PITA_48451	1.37913	0.0142643			PITA_37789	-5.42303	0.000955455
	PITA_05353	2.86974	0.0143409			PITA_47429	-2.95165	0.000959285
	PITA_18413	1.70607	0.0144104			PITA_02449	-2.21081	0.000961242
	PITA_50827	3.69636	0.0144104			PITA_45248	-7.68111	0.000969284
	PITA_34726	1.64497	0.0144159			PITA_02944	-5.59062	0.000969284
	PITA_24584	2.141	0.0146773			PITA_48713	-5.47247	0.000970762
	PITA_22826	2.62621	0.0147307			PITA_21025	-4.92241	0.000970762
	PITA_15093	3.2988	0.0147334			PITA_45663	-5.38731	0.000970762
	PITA_05294	1.43014	0.0148289			PITA_12221	-2.60116	0.000970762
	PITA_15280	1.31843	0.0150751			PITA_42887	-6.27429	0.000970762
	PITA_45144	1.20873	0.0153641			PITA_33641	-3.29122	0.000970762
	PITA_46745	1.38047	0.015647			PITA_02736	-1.3943	0.000970762
	PITA_46284	2.25971	0.015817			PITA_48142	-5.78468	0.000970762
	PITA_51358	2.03408	0.0161573			PITA_38601	-2.15516	0.000970762
	PITA_01877	2.65211	0.0162592			PITA_18813	-5.83078	0.00097097
	PITA_49015	3.50414	0.0163137			PITA_00500	-6.28347	0.00097799
	PITA_22678	2.11485	0.0164765			PITA_43261	-5.64935	0.000979622
	PITA_08974	1.50394	0.0165894			PITA_42880	-6.08044	0.000979622
	PITA_24444	1.19738	0.0166572			PITA_31948	-2.26513	0.000979622
	PITA_48080	1.44975	0.0166591			PITA_30927	-3.30094	0.000979622
	PITA_16939	1.96026	0.0166629			PITA_30161	-2.90964	0.000986236
	PITA_24956	1.81921	0.0169939			PITA_32771	-5.20381	0.00100263
	PITA_47371	2.19342	0.0170936			PITA_22163	-4.03126	0.00102301
	PITA_38969	1.31356	0.0171206			PITA_19931	-4.03328	0.00102301
	PITA_30061	1.4535	0.0172181			PITA_24005	-2.10109	0.00104414
	PITA_21547	1.92336	0.0172268			PITA_19014	-4.19902	0.00105528
	PITA_21630	3.39711	0.0172691			PITA_35267	-10.584	0.00105907
	PITA_47077	1.9595	0.0172909			PITA_31415	-5.10884	0.0010672
	PITA_00402	4.2175	0.0172909			PITA_38499	-4.98354	0.0010679
	PITA_38403	4.15108	0.0174923			PITA_30531	-3.33718	0.0010679
	PITA_01820	1.20573	0.0176545			PITA_27991	-6.08761	0.0010739
	PITA_46557	1.56053	0.0176974			PITA_02971	-3.91142	0.0010739
	PITA_31768	1.98426	0.0177534			PITA_09498	-2.50708	0.00107741
	PITA_08233	5.39887	0.017845			PITA_40852	-6.28886	0.00109224
	PITA_22600	2.2138	0.0178743			PITA_14411	-6.60439	0.00110447
	PITA_03277	1.77074	0.0181501			PITA_44053	-4.70536	0.00110447
	PITA_27503	3.57959	0.0181501			PITA_16502	-2.9258	0.00111358
	PITA_36413	1.73096	0.0181501			PITA_25505	-2.87311	0.00111358
	PITA_34906	1.27729	0.0185335			PITA_50664	-6.86924	0.00111358
	PITA_16236	3.71838	0.0185667			PITA_17176	-1.66782	0.00112273
	PITA_11932	1.43641	0.018653			PITA_35916	-6.62525	0.00112273
	PITA_29983	2.36567	0.0186834			PITA_22698	-3.3237	0.00112541
	PITA_36418	3.37488	0.0188183			PITA_29147	-5.71299	0.00113314
	PITA_12055	1.36698	0.0188284			PITA_12417	-1.75274	0.00113314
	PITA_19562	2.07976	0.018935			PITA_15287	-2.61691	0.00113314
	PITA_15336	6.9839	0.0193327			PITA_38451	-8.29676	0.00113314
	PITA_13451	1.3959	0.0194629			PITA_09041	-1.95951	0.00113314
	PITA_44115	1.36342	0.0194672			PITA_08471	-2.59232	0.00113314
	PITA_43121	1.89224	0.0194707			PITA_25075	-4.6968	0.00114344
	PITA_00324	1.97318	0.0195636			PITA_08208	-1.88518	0.00114794
	PITA_36124	1.85847	0.0195636			PITA_05320	-7.98843	0.00115578
	PITA_06300	1.68214	0.0195636			PITA_09245	-1.42025	0.00115578
	PITA_40540	1.81265	0.0195913			PITA_02167	-6.26591	0.00115578
	PITA_28602	1.37142	0.0196096			PITA_29925	-2.94896	0.00118888
	PITA_27021	2.93272	0.0198782			PITA_46530	-7.2836	0.00120263
	PITA_04904	3.65195	0.0202202			PITA_04258	-5.32612	0.00120263
	PITA_04322	2.41624	0.0202399			PITA_02628	-9.28364	0.00120332
	PITA_20104	1.61485	0.0202708			PITA_44262	-4.3536	0.00121343
	PITA_33073	1.6581	0.0202938			PITA_41201	-5.86606	0.00121349
	PITA_09614	1.42663	0.020397			PITA_09168	-8.93967	0.00121349
	PITA_12683	1.6926	0.0207167			PITA_12856	-3.20546	0.00121349
	PITA_47673	1.46015	0.0207629			PITA_12957	-3.9695	0.00121349
	PITA_30455	2.10546	0.020855			PITA_48032	-8.58469	0.00121349
	PITA_06374	1.72347	0.0209761			PITA_22612	-1.51011	0.00121349
	PITA_18421	1.81528	0.0211125			PITA_10226	-8.16798	0.00122579
	PITA_00990	1.62907	0.0213513			PITA_18974	-3.07776	0.00122998
	PITA_34200	3.47427	0.0217156			PITA_11911	-2.28042	0.00122998
	PITA_41884	1.15602	0.0217225			PITA_03689	-5.83405	0.00123094
	PITA_29622	2.49549	0.0217225			PITA_33325	-3.7919	0.00123469
	PITA_38235	3.2708	0.0217225			PITA_17158	-8.87135	0.00123639
	PITA_39263	1.4577	0.0218268			PITA_22919	-2.37429	0.00123639
	PITA_09551	1.62762	0.0219835			PITA_16212	-5.43134	0.00123639
	PITA_43448	2.84429	0.0220403			PITA_20107	-2.41995	0.00123988
	PITA_32791	2.34883	0.0220722			PITA_18864	-1.41977	0.00125611
	PITA_38052	1.80853	0.0221435			PITA_50896	-1.97966	0.00126853
	PITA_07106	1.06986	0.0221829			PITA_30524	-6.48448	0.0012722
	PITA_16956	1.68515	0.0222502			PITA_47363	-8.97378	0.00128654
	PITA_33129	2.08272	0.02227			PITA_22638	-2.4044	0.00128708
	PITA_26069	2.17237	0.0223073			PITA_02296	-5.63168	0.00130238
	PITA_33180	1.84821	0.0223186			PITA_36490	-2.15528	0.00130644
	PITA_30357	1.33607	0.0224371			PITA_24749	-1.95863	0.00130644
	PITA_09819	3.13433	0.0224751			PITA_12770	-2.02354	0.00132986
	PITA_45469	2.6988	0.0225231			PITA_08209	-9.27148	0.00133473
	PITA_32466	1.5088	0.0225578			PITA_40139	-9.31453	0.00134389
	PITA_13286	1.56379	0.022576			PITA_07902	-1.97548	0.00135255
	PITA_44208	1.49654	0.0226028			PITA_37259	-8.33034	0.00138104
	PITA_21154	3.18594	0.022729			PITA_18321	-2.88515	0.00138436
	PITA_40490	3.30365	0.0227609			PITA_07161	-3.56684	0.00138436
	PITA_21589	1.69046	0.0229457			PITA_23036	-3.44987	0.00138436
	PITA_26547	1.90851	0.0230987			PITA_44217	-5.90739	0.00138436
	PITA_30656	1.40173	0.0230987			PITA_16300	-3.51174	0.00138436
	PITA_21082	1.61715	0.0231666			PITA_10165	-3.47836	0.00138798
	PITA_12940	3.19943	0.0233065			PITA_14640	-2.89007	0.00139193
	PITA_13081	4.21817	0.0233226			PITA_18393	-4.28473	0.00141161
	PITA_43515	2.10152	0.0234155			PITA_31261	-5.37244	0.00141199
	PITA_27536	1.67591	0.0234309			PITA_30405	-1.9977	0.00141199
	PITA_00530	1.49001	0.0235683			PITA_20965	-5.86632	0.00141199
	PITA_07653	1.8501	0.0236558			PITA_43327	-3.36031	0.00141268
	PITA_02992	3.46014	0.0238068			PITA_18644	-4.64091	0.00141921
	PITA_13456	1.11663	0.0243172			PITA_38809	-3.96494	0.00142946
	PITA_08318	1.88325	0.024949			PITA_51157	-6.35477	0.00143188
	PITA_24483	2.21729	0.025408			PITA_22902	-2.55796	0.00144972
	PITA_28332	1.50999	0.0254101			PITA_19617	-2.71134	0.00144972
	PITA_19479	1.52168	0.0254509			PITA_16091	-3.59085	0.00146253
	PITA_01707	1.80919	0.0254509			PITA_12210	-4.12535	0.00150867
	PITA_20911	1.92604	0.0254509			PITA_29513	-3.95428	0.00150867
	PITA_26769	5.10907	0.0255599			PITA_31073	-3.76518	0.00150867
	PITA_07390	1.79544	0.0255599			PITA_09928	-6.72498	0.00150867
	PITA_24300	1.82322	0.0255803			PITA_26194	-2.31898	0.00150867
	PITA_11375	1.83304	0.0258569			PITA_20808	-5.13402	0.00150867
	PITA_35984	1.57793	0.0259482			PITA_51642	-2.29874	0.00150867
	PITA_26473	2.16264	0.0262586			PITA_04283	-3.81828	0.00150867
	PITA_15811	2.81384	0.0263499			PITA_09438	-3.81398	0.00150867
	PITA_39057	2.52724	0.0266368			PITA_04007	-9.46997	0.00151094
	PITA_47048	1.78931	0.0266695			PITA_22030	-1.80481	0.0015484
	PITA_28402	1.36451	0.0268014			PITA_36336	-3.82894	0.00155643
	PITA_48542	1.64801	0.0269559			PITA_26345	-2.47661	0.00155643
	PITA_08237	1.33446	0.0271844			PITA_47216	-4.54778	0.00155758
	PITA_32477	2.75569	0.0272319			PITA_34310	-8.05901	0.00160992
	PITA_12695	1.38803	0.0276874			PITA_25903	-8.00579	0.00160992
	PITA_32485	1.38913	0.0279819			PITA_28869	-6.04408	0.00160992
	PITA_12079	1.49181	0.0282177			PITA_07628	-7.79798	0.00161217
	PITA_42025	3.38355	0.0282177			PITA_26369	-2.91212	0.00161217
	PITA_03512	1.29895	0.0283268			PITA_08785	-5.65189	0.00161972
	PITA_39257	3.93976	0.0284255			PITA_37874	-2.84808	0.00163699
	PITA_08153	1.47986	0.0286511			PITA_10626	-6.14758	0.00164801
	PITA_18462	2.26057	0.0286975			PITA_40236	-4.81009	0.00165402
	PITA_37639	2.22582	0.0287791			PITA_49360	-9.68996	0.00165402
	PITA_40775	1.87211	0.0288016			PITA_48927	-6.60775	0.00166222
	PITA_11985	1.30334	0.0288315			PITA_02079	-1.36943	0.00166222
	PITA_25756	1.59186	0.0290003			PITA_27370	-4.74864	0.00166222
	PITA_24596	1.36364	0.0290992			PITA_33876	-6.24707	0.00166222
	PITA_22821	1.62927	0.0291563			PITA_07942	-8.50197	0.00168289
	PITA_02764	2.66915	0.0292413			PITA_28856	-5.63116	0.00168605
	PITA_04067	1.09758	0.0292571			PITA_39019	-5.50832	0.00168605
	PITA_32895	2.02102	0.0292571			PITA_10627	-7.12005	0.00168605
	PITA_07562	1.24063	0.0292571			PITA_26772	-3.73196	0.00169136
	PITA_15661	1.41931	0.0295335			PITA_23118	-1.78945	0.00169136
	PITA_51085	3.30489	0.0296583			PITA_39221	-9.46631	0.00170687
	PITA_04315	1.42076	0.029717			PITA_25270	-4.56782	0.00170687
	PITA_41309	1.36016	0.029798			PITA_51583	-5.36519	0.00172951
	PITA_11793	1.65644	0.0298953			PITA_24441	-7.69262	0.00175448
	PITA_09322	1.58095	0.0301321			PITA_25131	-3.05516	0.00176212
	PITA_12075	1.3344	0.0302773			PITA_45978	-3.02395	0.001774
	PITA_34422	2.31354	0.0303371			PITA_39044	-2.25367	0.00179161
	PITA_14642	1.69515	0.0303371			PITA_25303	-6.76427	0.00179161
	PITA_15007	3.42694	0.0304013			PITA_30946	-5.00109	0.00179161
	PITA_20064	1.7073	0.0304748			PITA_03006	-1.83493	0.00179161
	PITA_12396	1.08939	0.0307177			PITA_30359	-2.96336	0.00179161
	PITA_11602	3.28082	0.0308312			PITA_26095	-4.09599	0.00180284
	PITA_46050	3.93619	0.0308909			PITA_50603	-4.07259	0.00183312
	PITA_04412	1.45992	0.0308909			PITA_49910	-5.78503	0.00183747
	PITA_18879	2.16694	0.0308909			PITA_50628	-2.96501	0.00184227
	PITA_36511	1.88457	0.0310157			PITA_06213	-2.85422	0.00184227
	PITA_17803	2.27754	0.0313844			PITA_32756	-5.44746	0.00184227
	PITA_19196	1.101	0.0313851			PITA_26925	-7.89857	0.00184422
	PITA_26129	1.14992	0.0313851			PITA_29473	-2.69282	0.00185301
	PITA_44419	1.22406	0.0316598			PITA_31009	-2.30016	0.00186188
	PITA_06850	1.64994	0.0319392			PITA_24947	-2.96558	0.00186188
	PITA_39455	2.83468	0.0321125			PITA_18843	-5.45058	0.00186188
	PITA_14706	2.75015	0.032342			PITA_23543	-3.87175	0.00186188
	PITA_21421	1.45278	0.0325709			PITA_46825	-9.3606	0.00187573
	PITA_27224	1.12548	0.0327038			PITA_33816	-7.27081	0.00188158
	PITA_44583	1.46984	0.032709			PITA_03477	-2.49784	0.00188194
	PITA_45254	1.42908	0.0328089			PITA_21070	-3.97156	0.00188194
	PITA_27774	2.20034	0.0328537			PITA_31978	-2.33685	0.00191421
	PITA_38491	1.26926	0.0330378			PITA_17809	-1.87256	0.00191421
	PITA_41397	1.27736	0.0330382			PITA_25397	-3.13847	0.00191939
	PITA_23112	1.56474	0.0331585			PITA_14169	-6.13664	0.00192034
	PITA_13589	1.29862	0.0332403			PITA_08000	-2.4849	0.00192423
	PITA_07552	1.4482	0.0335059			PITA_36170	-1.55845	0.00192519
	PITA_46722	2.47264	0.0335237			PITA_48747	-2.97945	0.00192519
	PITA_14441	1.26603	0.033598			PITA_44237	-5.83514	0.00194591
	PITA_11437	2.40173	0.033598			PITA_24950	-3.96628	0.00196971
	PITA_16410	2.02509	0.0339505			PITA_14514	-9.43398	0.00197367
	PITA_43505	1.2469	0.0339702			PITA_39659	-2.34894	0.00198508
	PITA_47744	1.15867	0.0339702			PITA_33059	-4.95398	0.00198508
	PITA_06860	2.25011	0.0341533			PITA_40156	-3.7588	0.00199203
	PITA_42692	2.02057	0.0341959			PITA_08027	-5.34789	0.00200024
	PITA_06228	1.31201	0.0342638			PITA_38069	-3.60305	0.00200051
	PITA_12320	1.33969	0.0343033			PITA_06074	-3.06372	0.00200051
	PITA_39870	2.99307	0.0343412			PITA_12742	-1.71158	0.00204347
	PITA_27525	1.38943	0.03442			PITA_12789	-1.87296	0.00204363
	PITA_05992	2.21296	0.03442			PITA_46880	-2.54223	0.00204784
	PITA_40693	1.40067	0.0345109			PITA_30206	-3.57472	0.00206497
	PITA_09144	2.28594	0.034975			PITA_12501	-2.06473	0.00206878
	PITA_12468	2.66016	0.0351105			PITA_26167	-5.15777	0.00208454
	PITA_32499	2.2132	0.035412			PITA_19445	-6.00878	0.00208454
	PITA_43645	2.31757	0.0356223			PITA_40506	-2.89261	0.00208454
	PITA_51045	1.26996	0.03601			PITA_32479	-2.09395	0.00209674
	PITA_16073	1.68661	0.0365663			PITA_08903	-4.64969	0.00209674
	PITA_46112	1.45269	0.036643			PITA_34483	-2.732	0.00211148
	PITA_06482	1.69268	0.0366746			PITA_07007	-4.27495	0.00211148
	PITA_31642	3.15156	0.0369053			PITA_29748	-5.23009	0.00211996
	PITA_45777	2.10444	0.0374702			PITA_43376	-6.11893	0.00213973
	PITA_07865	1.23491	0.0374742			PITA_50378	-2.62161	0.00214048
	PITA_01986	1.3805	0.0378463			PITA_20803	-3.47244	0.00215366
	PITA_45281	2.91742	0.0378744			PITA_20358	-1.43331	0.00217749
	PITA_16800	1.29361	0.038037			PITA_43105	-3.37774	0.00217941
	PITA_38906	1.37238	0.0380552			PITA_11626	-1.32248	0.00217941
	PITA_45859	2.52547	0.0382814			PITA_13688	-3.82316	0.00217941
	PITA_30449	2.05838	0.0382814			PITA_29253	-2.15819	0.0022322
	PITA_39566	3.54312	0.038301			PITA_43456	-10.035	0.0022322
	PITA_14000	1.73576	0.038301			PITA_05351	-1.51843	0.0022529
	PITA_02956	3.72067	0.0383089			PITA_50425	-3.00115	0.00225622
	PITA_49582	2.93912	0.0383395			PITA_07580	-4.88397	0.00225622
	PITA_03972	1.80996	0.0383834			PITA_01611	-8.04916	0.00231359
	PITA_37961	2.57509	0.0383834			PITA_47130	-5.24124	0.00231618
	PITA_13920	4.20071	0.0383834			PITA_04446	-6.40461	0.00231618
	PITA_01440	1.76878	0.0384965			PITA_23474	-4.5569	0.00240995
	PITA_42347	1.27372	0.0392961			PITA_16509	-4.71142	0.00242333
	PITA_02067	1.26007	0.0393091			PITA_41820	-2.7356	0.00242333
	PITA_23994	1.29923	0.0395164			PITA_27636	-2.55083	0.00244072
	PITA_17540	0.949453	0.0400911			PITA_01704	-2.60959	0.00244072
	PITA_37612	1.39194	0.0402132			PITA_22901	-4.08608	0.00244857
	PITA_11235	3.75	0.0402132			PITA_04101	-3.69317	0.00244857
	PITA_31358	1.66413	0.0407996			PITA_34913	-2.69236	0.00245222
	PITA_06533	1.48503	0.0410404			PITA_26944	-5.86092	0.0024621
	PITA_51437	1.31728	0.0411354			PITA_25465	-1.96254	0.00249394
	PITA_13969	0.934893	0.0412787			PITA_09428	-2.3774	0.00250071
	PITA_16625	1.07262	0.0413742			PITA_10216	-3.52561	0.00255001
	PITA_02293	1.69254	0.0413894			PITA_19463	-1.44406	0.00256517
	PITA_03784	2.70896	0.0416343			PITA_04492	-3.14341	0.00256517
	PITA_07253	1.3492	0.042078			PITA_33524	-6.02922	0.00257019
	PITA_36052	2.27471	0.0421444			PITA_41938	-4.18619	0.00257377
	PITA_18019	1.69152	0.0421444			PITA_18777	-8.96059	0.00258277
	PITA_11761	2.40082	0.042225			PITA_38336	-4.89737	0.00259965
	PITA_47331	1.32635	0.0422351			PITA_32349	-2.62818	0.00261117
	PITA_37501	1.23146	0.0423121			PITA_42897	-2.28793	0.00262269
	PITA_42205	2.15162	0.0423298			PITA_27703	-7.58359	0.00262331
	PITA_16671	1.24906	0.0424717			PITA_33346	-3.39808	0.00262414
	PITA_08995	1.30833	0.0428157			PITA_51169	-4.67511	0.00263362
	PITA_07683	2.18455	0.0428157			PITA_34613	-1.20904	0.00265423
	PITA_15829	1.4625	0.0428157			PITA_22879	-2.09785	0.00265423
	PITA_10972	1.66782	0.0429218			PITA_05086	-2.02896	0.00265423
	PITA_45393	1.90885	0.0430135			PITA_20957	-3.66461	0.00265512
	PITA_35437	6.69732	0.0441861			PITA_36148	-2.67973	0.0026661
	PITA_46959	2.45456	0.0442973			PITA_05390	-3.11047	0.00266804
	PITA_07343	1.12885	0.044448			PITA_07784	-2.3211	0.00266804
	PITA_48016	1.40457	0.0445013			PITA_01171	-2.02592	0.002675
	PITA_25110	2.25634	0.0447156			PITA_31275	-3.85974	0.00267615
	PITA_14409	2.41461	0.0447156			PITA_13088	-2.1903	0.00272982
	PITA_41394	1.44456	0.0448533			PITA_42310	-4.45486	0.00275438
	PITA_05270	1.87623	0.0448639			PITA_04872	-2.44162	0.00277949
	PITA_43219	1.16437	0.044865			PITA_27161	-8.69903	0.00277949
	PITA_34706	1.44134	0.0449234			PITA_36804	-2.12722	0.00281824
	PITA_08399	1.71936	0.0449347			PITA_29566	-3.99843	0.00287783
	PITA_06423	1.16611	0.0451775			PITA_27922	-3.38306	0.00290138
	PITA_44466	1.72426	0.0451775			PITA_12493	-2.97944	0.00290138
	PITA_37597	1.17686	0.0452274			PITA_38957	-5.93663	0.00296676
	PITA_24817	2.6405	0.0452274			PITA_26312	-3.07618	0.00296676
	PITA_09486	2.02109	0.0452563			PITA_40310	-5.3775	0.00297502
	PITA_50766	3.46936	0.0452901			PITA_51144	-2.81724	0.00297502
	PITA_49120	1.60538	0.0457027			PITA_01546	-3.29378	0.00299789
	PITA_26788	2.52057	0.0458921			PITA_00102	-3.86876	0.00300764
	PITA_21369	2.69996	0.0461261			PITA_33135	-3.88652	0.00300764
	PITA_24239	1.16956	0.0461261			PITA_18842	-2.57297	0.00301443
	PITA_11228	1.7748	0.0461344			PITA_00099	-5.80515	0.00302022
	PITA_45447	1.79168	0.0462001			PITA_12198	-1.86756	0.00302022
	PITA_50185	1.7623	0.0466104			PITA_42017	-1.77104	0.0030266
	PITA_51393	2.53673	0.0466104			PITA_41056	-3.36044	0.0030266
	PITA_30623	2.33005	0.0471343			PITA_39771	-9.49187	0.0030266
	PITA_43329	2.40213	0.0471343			PITA_02313	-2.40972	0.0030266
	PITA_19275	1.3512	0.04719			PITA_09866	-6.57004	0.00305483
	PITA_20483	2.10631	0.0473082			PITA_18786	-2.31357	0.00308648
	PITA_02062	3.39462	0.0474631			PITA_44453	-3.74388	0.00309176
	PITA_21827	2.4011	0.0474631			PITA_40333	-1.29723	0.00311064
	PITA_37579	1.33532	0.0475354			PITA_00835	-1.2843	0.00322315
	PITA_34499	1.50264	0.0477408			PITA_23430	-3.08559	0.00323367
	PITA_21997	1.26541	0.0481741			PITA_14317	-1.88353	0.00323367
	PITA_21644	1.6861	0.0481741			PITA_18660	-6.37114	0.00323858
	PITA_12158	1.24542	0.0482402			PITA_15438	-1.58666	0.00323858
	PITA_29290	2.59388	0.0482439			PITA_15529	-4.84505	0.00323858
	PITA_18332	4.61268	0.0483401			PITA_44090	-5.88188	0.00323858
	PITA_16635	0.944351	0.0485616			PITA_33104	-4.35486	0.00325068
	PITA_43916	1.63942	0.0486154			PITA_32851	-2.47938	0.00328049
	PITA_07593	3.47861	0.0486763			PITA_13062	-3.402	0.0032879
	PITA_44979	1.49819	0.0490957			PITA_33693	-1.25639	0.00328904
	PITA_30013	1.14015	0.0491288			PITA_00904	-6.08571	0.00328904
	PITA_10431	1.32252	0.0492809			PITA_38814	-2.03746	0.00329801
	PITA_47186	2.52785	0.0494567			PITA_30843	-2.13217	0.00330544
	PITA_49444	1.09471	0.0495397			PITA_10039	-1.81652	0.0033175
	PITA_15846	1.16642	0.0495863			PITA_29787	-2.14946	0.00332878
						PITA_23975	-3.62963	0.00332878
						PITA_14860	-2.20745	0.00335885
						PITA_28439	-4.43547	0.00335885
						PITA_41577	-4.79822	0.00337345
						PITA_26776	-3.35379	0.00341503
						PITA_34846	-1.77133	0.00342978
						PITA_14470	-3.44905	0.00346271
						PITA_12014	-5.24476	0.00346271
						PITA_10162	-4.36863	0.00346271
						PITA_29508	-4.17293	0.00346271
						PITA_46374	-5.67105	0.00346631
						PITA_11725	-3.47486	0.00348077
						PITA_03097	-3.62303	0.00348077
						PITA_30466	-6.22187	0.0034857
						PITA_09780	-2.99902	0.00355412
						PITA_01355	-3.21418	0.00355412
						PITA_37134	-4.01464	0.0035548
						PITA_48672	-3.325	0.0035593
						PITA_29260	-1.55556	0.00356036
						PITA_33715	-2.78704	0.00358396
						PITA_42605	-5.26379	0.00359226
						PITA_50784	-1.80948	0.00360167
						PITA_12649	-2.33509	0.00360827
						PITA_50824	-4.71409	0.00361519
						PITA_03878	-1.86142	0.00363512
						PITA_07579	-1.17543	0.00363512
						PITA_51275	-5.65234	0.00367252
						PITA_48766	-4.6307	0.00369171
						PITA_36145	-3.30981	0.00369967
						PITA_03091	-4.90066	0.00373163
						PITA_15805	-1.33746	0.00373677
						PITA_39550	-2.76174	0.00373677
						PITA_30131	-4.99757	0.00381763
						PITA_39848	-5.32505	0.00382284
						PITA_34562	-5.61772	0.00389613
						PITA_44521	-2.0289	0.0038997
						PITA_23327	-1.66904	0.00391084
						PITA_01888	-3.15554	0.0039632
						PITA_35649	-1.7657	0.00400502
						PITA_43186	-8.49885	0.00400502
						PITA_42681	-3.74906	0.00404126
						PITA_11840	-2.04391	0.00404928
						PITA_12660	-3.07861	0.00406312
						PITA_03074	-2.47613	0.00409888
						PITA_16582	-2.69289	0.00411552
						PITA_18182	-2.18001	0.00413255
						PITA_19361	-4.60744	0.00413255
						PITA_21704	-3.84021	0.00414116
						PITA_06951	-2.27992	0.00414116
						PITA_20975	-4.02342	0.00414116
						PITA_41289	-1.40303	0.00417158
						PITA_07366	-1.42434	0.00417768
						PITA_42357	-5.16631	0.0041828
						PITA_12022	-1.84422	0.0041828
						PITA_25324	-3.14396	0.00419812
						PITA_13793	-4.80136	0.00419812
						PITA_39929	-4.7557	0.00420144
						PITA_40008	-4.04983	0.00421542
						PITA_27180	-2.05834	0.00421542
						PITA_05276	-2.50413	0.00424467
						PITA_33791	-4.52214	0.00425702
						PITA_37983	-1.97742	0.00429253
						PITA_00482	-2.02412	0.00430026
						PITA_36894	-1.66813	0.00434077
						PITA_38569	-5.92089	0.00435086
						PITA_05728	-2.67892	0.00439719
						PITA_12216	-4.72979	0.00439719
						PITA_23179	-2.02573	0.00444123
						PITA_31393	-3.61202	0.00444225
						PITA_42087	-5.284	0.00444225
						PITA_51400	-4.18468	0.00444225
						PITA_17100	-1.32296	0.00444225
						PITA_05637	-3.63363	0.00444225
						PITA_09502	-7.84411	0.0044683
						PITA_09412	-2.57762	0.0044683
						PITA_24963	-5.28542	0.00447382
						PITA_40960	-4.9672	0.00447382
						PITA_19862	-2.92715	0.00447382
						PITA_04685	-4.31645	0.00447382
						PITA_32312	-3.14924	0.00447546
						PITA_45274	-5.07992	0.00449132
						PITA_38741	-2.99549	0.00450373
						PITA_10535	-2.03062	0.00458311
						PITA_20941	-2.62476	0.00458311
						PITA_26482	-2.93711	0.0045958
						PITA_49502	-3.21762	0.00459715
						PITA_46775	-2.04325	0.00467428
						PITA_00564	-1.99211	0.00467428
						PITA_18365	-2.46811	0.00473981
						PITA_10962	-3.59769	0.00475318
						PITA_45193	-2.48703	0.00477227
						PITA_44830	-1.32388	0.00477227
						PITA_33359	-6.81811	0.00478952
						PITA_45657	-5.22069	0.00482141
						PITA_21156	-2.37417	0.00484099
						PITA_07953	-2.53541	0.00484099
						PITA_42883	-4.49407	0.00487074
						PITA_35705	-4.86302	0.0048971
						PITA_00240	-3.92341	0.00498692
						PITA_20665	-4.98755	0.00498692
						PITA_06466	-5.58197	0.00501241
						PITA_48902	-2.79811	0.00502554
						PITA_25623	-2.70635	0.00509251
						PITA_12532	-5.584	0.00510543
						PITA_22166	-5.55622	0.00512373
						PITA_50252	-3.30498	0.00514299
						PITA_13926	-4.14434	0.00515928
						PITA_43296	-3.89904	0.00525126
						PITA_46887	-3.48461	0.00530329
						PITA_30044	-3.40726	0.00530329
						PITA_12053	-1.82795	0.0053483
						PITA_26466	-5.70555	0.0053483
						PITA_14098	-4.4551	0.00535746
						PITA_15518	-1.29846	0.00535746
						PITA_41805	-2.15968	0.00536185
						PITA_33329	-3.94663	0.00538354
						PITA_26975	-4.30592	0.00539961
						PITA_08166	-2.47809	0.00542102
						PITA_14330	-5.35079	0.00542102
						PITA_48607	-6.15248	0.00542102
						PITA_32649	-8.29459	0.00542102
						PITA_45314	-6.02351	0.00542102
						PITA_46830	-1.92763	0.00542102
						PITA_10474	-1.52529	0.0054533
						PITA_20479	-3.34935	0.0054533
						PITA_31633	-2.11171	0.00545338
						PITA_28569	-1.71253	0.0054616
						PITA_45040	-2.65606	0.0054616
						PITA_44729	-3.12126	0.0054797
						PITA_00470	-2.62215	0.00559704
						PITA_44799	-3.1566	0.00562061
						PITA_02893	-5.56146	0.00562061
						PITA_19505	-2.42329	0.00563175
						PITA_08280	-3.18777	0.00563804
						PITA_06343	-2.20638	0.00573034
						PITA_16592	-2.21808	0.00573155
						PITA_03968	-6.26856	0.00573155
						PITA_24877	-7.50699	0.00573155
						PITA_43712	-4.62023	0.00574929
						PITA_05792	-4.87277	0.00578527
						PITA_26164	-2.85196	0.0058067
						PITA_08098	-6.55624	0.0058068
						PITA_08033	-1.68908	0.00582799
						PITA_50430	-2.93525	0.00583861
						PITA_05666	-5.04805	0.00583861
						PITA_18565	-2.49887	0.0058677
						PITA_07140	-2.19444	0.00590244
						PITA_38345	-1.6508	0.00596721
						PITA_17164	-4.8546	0.00598518
						PITA_18486	-3.74991	0.00599689
						PITA_20487	-2.60805	0.00604249
						PITA_41846	-5.68836	0.00604249
						PITA_18689	-2.02585	0.00604249
						PITA_15094	-1.47483	0.00604249
						PITA_46720	-2.89247	0.00604249
						PITA_12321	-4.59285	0.00604249
						PITA_09584	-1.98365	0.00604361
						PITA_05952	-3.51164	0.00607379
						PITA_09910	-4.77617	0.00613658
						PITA_00454	-4.5721	0.0061387
						PITA_40143	-3.441	0.00615517
						PITA_45847	-3.85521	0.00616247
						PITA_27027	-3.06293	0.00616247
						PITA_45841	-5.45299	0.00616247
						PITA_36542	-2.53317	0.00617469
						PITA_14168	-1.47797	0.00623889
						PITA_14840	-5.78888	0.00623889
						PITA_29661	-5.80344	0.00625299
						PITA_39549	-2.68871	0.00625299
						PITA_06208	-2.371	0.00625882
						PITA_39591	-2.79004	0.00632946
						PITA_20249	-5.04246	0.00635288
						PITA_14019	-5.14456	0.00635411
						PITA_16839	-1.31947	0.00635411
						PITA_29384	-6.04144	0.00637756
						PITA_28343	-2.36482	0.00637756
						PITA_06756	-2.83506	0.0064139
						PITA_43812	-3.09913	0.0064139
						PITA_47534	-5.41899	0.00654664
						PITA_35653	-3.00088	0.0065655
						PITA_42542	-4.09692	0.00658042
						PITA_13621	-4.08827	0.00667689
						PITA_47493	-3.4573	0.00667689
						PITA_08323	-2.79544	0.00667689
						PITA_41111	-3.4969	0.00668739
						PITA_46045	-4.55077	0.00669304
						PITA_20601	-4.68324	0.00672241
						PITA_07313	-3.01722	0.00678279
						PITA_39742	-1.65014	0.00679541
						PITA_36466	-3.3795	0.00682877
						PITA_00506	-4.40433	0.00687747
						PITA_13148	-2.23486	0.00687747
						PITA_32242	-3.91669	0.00687747
						PITA_33205	-2.51921	0.00687747
						PITA_26934	-4.37923	0.00690527
						PITA_27617	-2.87457	0.00699099
						PITA_03418	-1.92904	0.00705329
						PITA_16614	-3.60407	0.00706278
						PITA_18207	-1.69595	0.00710972
						PITA_47910	-2.82162	0.00711506
						PITA_21902	-4.3856	0.00711936
						PITA_17443	-3.83729	0.00717333
						PITA_12741	-5.44099	0.00717333
						PITA_11359	-2.99645	0.00717333
						PITA_15483	-2.54417	0.00717333
						PITA_38051	-5.67078	0.00719088
						PITA_43678	-2.17538	0.00719968
						PITA_15139	-5.27135	0.00723764
						PITA_27592	-7.54506	0.00724795
						PITA_31538	-1.69666	0.00725024
						PITA_23254	-2.98564	0.00736594
						PITA_28566	-7.8261	0.0073836
						PITA_38093	-1.40238	0.0074384
						PITA_42010	-3.41732	0.00749065
						PITA_35888	-2.95322	0.00754295
						PITA_47682	-8.01284	0.00754295
						PITA_13687	-3.09059	0.00768236
						PITA_30120	-3.67989	0.00769667
						PITA_31319	-5.30855	0.00776947
						PITA_45654	-1.46321	0.00778486
						PITA_12401	-1.72584	0.00785288
						PITA_51173	-1.4591	0.00786397
						PITA_14097	-2.50623	0.00797045
						PITA_24173	-2.79026	0.00797627
						PITA_24720	-4.38328	0.00800862
						PITA_09416	-7.62555	0.00801869
						PITA_41378	-2.08388	0.00802772
						PITA_24031	-3.49133	0.00808639
						PITA_47560	-3.73533	0.00808639
						PITA_15648	-1.34523	0.00812924
						PITA_29259	-2.16637	0.00814006
						PITA_36165	-2.99173	0.00816663
						PITA_33531	-3.40278	0.00843932
						PITA_19070	-3.98568	0.00860805
						PITA_24245	-3.83442	0.00867075
						PITA_42973	-3.20008	0.00870481
						PITA_03961	-2.65301	0.00874979
						PITA_16349	-2.0686	0.00876437
						PITA_38154	-3.6914	0.00876771
						PITA_01907	-7.69281	0.00876771
						PITA_13160	-4.45479	0.00876771
						PITA_08812	-3.12727	0.00878628
						PITA_20136	-4.38903	0.00878628
						PITA_21038	-1.90663	0.00878628
						PITA_15706	-2.1437	0.00880417
						PITA_19903	-4.408	0.00880417
						PITA_39227	-1.96302	0.00881262
						PITA_31825	-1.45342	0.00882546
						PITA_36474	-6.54806	0.00886006
						PITA_10659	-3.54279	0.00894035
						PITA_44136	-2.4297	0.00901152
						PITA_05891	-3.25129	0.00903109
						PITA_14262	-1.48818	0.00904249
						PITA_16563	-2.10659	0.00904249
						PITA_28191	-3.53446	0.00904249
						PITA_01775	-1.60494	0.00904249
						PITA_39036	-4.41414	0.0091307
						PITA_08260	-4.5496	0.0091307
						PITA_37606	-3.03652	0.0091307
						PITA_50420	-2.08038	0.0091307
						PITA_11850	-3.46861	0.0091369
						PITA_07613	-2.84051	0.00914924
						PITA_15611	-4.42157	0.00914924
						PITA_18526	-1.77771	0.00914924
						PITA_17899	-4.00464	0.00914924
						PITA_48519	-4.98729	0.00914924
						PITA_31681	-4.92526	0.00920212
						PITA_25453	-3.08226	0.00925407
						PITA_49260	-3.46956	0.00925407
						PITA_29170	-7.72145	0.00925407
						PITA_33471	-6.06687	0.00925407
						PITA_30428	-3.37411	0.00931138
						PITA_46230	-1.66666	0.00941934
						PITA_19422	-4.02604	0.00953438
						PITA_29764	-4.31157	0.00968023
						PITA_09817	-2.96444	0.00968023
						PITA_02460	-3.98051	0.009718
						PITA_42081	-4.62122	0.00974278
						PITA_47365	-5.44388	0.00978639
						PITA_40875	-1.17259	0.00980273
						PITA_17403	-1.70271	0.00980473
						PITA_02112	-2.20392	0.00984808
						PITA_36703	-2.32404	0.00987524
						PITA_46440	-5.89397	0.00991516
						PITA_42468	-2.21227	0.00991516
						PITA_21565	-1.54725	0.0100006
						PITA_34428	-2.21289	0.0100006
						PITA_09013	-4.65807	0.0100006
						PITA_41412	-2.31831	0.0100253
						PITA_03382	-2.01011	0.0100664
						PITA_15793	-3.16087	0.0100743
						PITA_29869	-2.8253	0.0101154
						PITA_08338	-1.46219	0.0101373
						PITA_27140	-4.42982	0.0101373
						PITA_07156	-3.97825	0.0102002
						PITA_07395	-2.73786	0.0102559
						PITA_18670	-7.12315	0.0102763
						PITA_02987	-2.84235	0.0102868
						PITA_17723	-3.61592	0.0102966
						PITA_03786	-2.6368	0.0102966
						PITA_49369	-2.47077	0.0103478
						PITA_10561	-7.30278	0.0103536
						PITA_49281	-2.50378	0.0103763
						PITA_48063	-4.76858	0.0104665
						PITA_27582	-1.0768	0.0105106
						PITA_44250	-1.47114	0.0105249
						PITA_04126	-4.84765	0.0105383
						PITA_08890	-7.53869	0.0105632
						PITA_44452	-4.80691	0.0105819
						PITA_26648	-3.46384	0.010712
						PITA_30741	-4.1058	0.010751
						PITA_15860	-1.66038	0.0108029
						PITA_18910	-3.4131	0.0108151
						PITA_17963	-3.0709	0.0109781
						PITA_33410	-4.08368	0.0109952
						PITA_02418	-4.4459	0.0109952
						PITA_11128	-3.69612	0.0109952
						PITA_14941	-5.25788	0.0109952
						PITA_14111	-1.60138	0.0110462
						PITA_33083	-2.7548	0.0111151
						PITA_44252	-2.36039	0.0111507
						PITA_11902	-1.67346	0.0111767
						PITA_19292	-4.44866	0.0112449
						PITA_20419	-3.4184	0.0114069
						PITA_20935	-4.30523	0.0114069
						PITA_51734	-8.82563	0.0114112
						PITA_34423	-7.14763	0.0114295
						PITA_45544	-3.54516	0.011492
						PITA_34739	-1.86284	0.011492
						PITA_28257	-1.60939	0.011492
						PITA_37620	-4.19991	0.0117374
						PITA_38429	-3.83565	0.0117572
						PITA_33833	-2.71052	0.0118458
						PITA_03845	-2.60439	0.0118738
						PITA_01664	-2.04465	0.0118852
						PITA_12436	-3.3101	0.0118852
						PITA_10682	-7.79759	0.0119701
						PITA_28731	-1.35422	0.0119701
						PITA_03855	-8.84052	0.0120044
						PITA_34667	-4.0205	0.0120893
						PITA_03696	-5.16403	0.0121778
						PITA_20875	-6.68457	0.0122548
						PITA_24348	-3.39201	0.0123474
						PITA_29786	-5.42261	0.012401
						PITA_29449	-5.95599	0.0125837
						PITA_41395	-3.93417	0.0126125
						PITA_04667	-1.36965	0.0126541
						PITA_43102	-1.42909	0.0126967
						PITA_47196	-4.40416	0.0128404
						PITA_03921	-3.43988	0.0128884
						PITA_24356	-4.58526	0.012909
						PITA_39491	-2.37914	0.0129124
						PITA_31556	-3.12971	0.0129189
						PITA_02679	-3.63071	0.0130418
						PITA_18459	-1.89766	0.0130689
						PITA_04519	-3.70305	0.0130885
						PITA_06915	-1.93347	0.0130885
						PITA_14809	-1.95039	0.0130885
						PITA_30017	-2.66904	0.0130885
						PITA_50939	-2.92592	0.0131047
						PITA_18117	-3.16903	0.013124
						PITA_10941	-4.39497	0.013159
						PITA_20690	-3.1856	0.013159
						PITA_04421	-1.50403	0.0132283
						PITA_38800	-7.57075	0.013288
						PITA_10418	-4.99342	0.0133084
						PITA_00455	-3.22711	0.0133992
						PITA_06747	-4.15982	0.0135573
						PITA_26028	-3.20677	0.0135846
						PITA_15615	-7.07737	0.0136191
						PITA_03738	-3.36365	0.0136797
						PITA_34814	-3.76546	0.0136848
						PITA_03639	-2.224	0.0137159
						PITA_07643	-5.31711	0.0137468
						PITA_39132	-2.83655	0.0138245
						PITA_00501	-2.79225	0.0138245
						PITA_26783	-2.82456	0.0138347
						PITA_15235	-2.16278	0.0138447
						PITA_04118	-3.03002	0.0138447
						PITA_32783	-4.41728	0.0139203
						PITA_05701	-6.27489	0.0139203
						PITA_06874	-1.77784	0.0139203
						PITA_30731	-2.05826	0.0139203
						PITA_48662	-2.4036	0.0139223
						PITA_28538	-7.42414	0.014049
						PITA_22697	-3.4463	0.0142643
						PITA_20750	-4.91554	0.0142774
						PITA_47070	-1.83523	0.0142942
						PITA_25301	-2.67638	0.0144104
						PITA_10582	-2.27201	0.0144607
						PITA_20048	-4.54248	0.0144607
						PITA_31447	-4.14552	0.0144968
						PITA_00773	-3.37126	0.0145416
						PITA_41244	-1.71517	0.0145416
						PITA_03640	-3.45034	0.0146907
						PITA_06395	-2.80345	0.0146923
						PITA_14490	-2.53257	0.0147306
						PITA_29412	-2.52866	0.0147334
						PITA_42578	-2.3288	0.0147334
						PITA_12579	-5.37661	0.0148019
						PITA_08708	-1.22812	0.0148339
						PITA_26857	-2.08219	0.0150158
						PITA_16712	-3.62661	0.0150489
						PITA_14759	-4.66311	0.0150976
						PITA_23245	-4.74977	0.015178
						PITA_27691	-4.2828	0.015178
						PITA_02582	-2.58359	0.0153641
						PITA_17806	-2.70396	0.0153737
						PITA_02760	-2.33458	0.0153872
						PITA_01019	-1.71563	0.0154117
						PITA_06148	-4.54257	0.0154757
						PITA_15333	-2.00686	0.0156307
						PITA_15108	-3.3923	0.015802
						PITA_31901	-1.59345	0.0158624
						PITA_11329	-8.07792	0.0159446
						PITA_19790	-4.75219	0.0159651
						PITA_31114	-1.78312	0.0161573
						PITA_30828	-2.4643	0.0161803
						PITA_43831	-1.28383	0.0161804
						PITA_32468	-1.77068	0.0162385
						PITA_29593	-2.5555	0.0162537
						PITA_47891	-6.30013	0.0162592
						PITA_38908	-2.24869	0.0163137
						PITA_45795	-2.26848	0.0163137
						PITA_12213	-4.25594	0.016386
						PITA_04236	-3.90327	0.0165285
						PITA_37330	-1.70645	0.0165985
						PITA_23105	-8.03302	0.0166591
						PITA_11885	-4.84588	0.0166629
						PITA_23131	-1.47445	0.016778
						PITA_15869	-5.56126	0.016778
						PITA_09120	-2.69163	0.0168358
						PITA_20773	-3.55396	0.0168358
						PITA_17323	-4.12079	0.0168503
						PITA_46465	-1.10829	0.0168503
						PITA_34978	-3.32796	0.0168868
						PITA_09453	-3.31604	0.0169546
						PITA_16138	-3.30931	0.016957
						PITA_23279	-4.2172	0.0170032
						PITA_04929	-1.34401	0.0170433
						PITA_22644	-3.22413	0.0171087
						PITA_47574	-1.80309	0.0171087
						PITA_27871	-1.54708	0.0171289
						PITA_49845	-7.77241	0.0172658
						PITA_44169	-2.84975	0.0172909
						PITA_32533	-3.11064	0.0174673
						PITA_32959	-2.34271	0.0174673
						PITA_38389	-4.08263	0.0174673
						PITA_42852	-1.70804	0.0174923
						PITA_29783	-3.25917	0.0176188
						PITA_04055	-2.28294	0.0176188
						PITA_36293	-2.78738	0.0176545
						PITA_45024	-3.099	0.0177518
						PITA_35499	-5.01062	0.0177547
						PITA_03866	-1.93754	0.017831
						PITA_35775	-1.37125	0.017831
						PITA_40372	-3.32553	0.017845
						PITA_47853	-1.26115	0.017845
						PITA_21483	-2.52873	0.0179538
						PITA_33917	-2.42915	0.0179538
						PITA_19963	-2.01478	0.0180313
						PITA_13408	-2.53465	0.0181034
						PITA_43414	-1.40565	0.0181096
						PITA_38545	-3.13484	0.0181501
						PITA_24481	-1.86739	0.0181549
						PITA_29504	-3.91608	0.0184052
						PITA_40244	-1.55343	0.0185667
						PITA_14784	-5.54218	0.0186721
						PITA_28256	-2.01148	0.0187049
						PITA_51679	-4.07588	0.0187544
						PITA_31761	-2.99665	0.0191969
						PITA_20765	-3.28436	0.0193327
						PITA_06944	-3.34046	0.0194672
						PITA_20330	-3.89286	0.0195636
						PITA_19242	-1.19427	0.0196328
						PITA_39426	-2.6728	0.0197963
						PITA_38227	-2.56107	0.0198633
						PITA_26316	-3.14673	0.0199618
						PITA_50877	-5.9822	0.0199618
						PITA_18017	-2.28859	0.0200201
						PITA_30355	-2.74255	0.0201882
						PITA_01224	-3.13384	0.0202708
						PITA_44277	-2.21935	0.0206593
						PITA_20995	-1.82654	0.0206793
						PITA_46946	-3.09383	0.020749
						PITA_28042	-5.21738	0.0207999
						PITA_10274	-3.70776	0.0209513
						PITA_30503	-3.24354	0.0210912
						PITA_45756	-2.76417	0.0211125
						PITA_46422	-5.32425	0.0211313
						PITA_29358	-3.54425	0.021163
						PITA_47959	-2.4611	0.02132
						PITA_33723	-2.52317	0.0214792
						PITA_44590	-1.06805	0.0214792
						PITA_18439	-3.02709	0.0214792
						PITA_25325	-2.34539	0.021587
						PITA_27149	-1.25214	0.0216301
						PITA_31660	-6.73891	0.0217225
						PITA_26847	-7.3009	0.0217279
						PITA_05827	-2.06861	0.0219608
						PITA_46754	-5.97415	0.0219835
						PITA_41778	-5.35854	0.022116
						PITA_17492	-2.38229	0.0221735
						PITA_27727	-1.43809	0.022277
						PITA_07633	-2.53049	0.0223173
						PITA_35704	-2.96592	0.0223186
						PITA_13265	-3.25014	0.0223724
						PITA_02519	-1.37315	0.0224351
						PITA_42094	-2.07957	0.0225231
						PITA_34988	-1.83213	0.022576
						PITA_27010	-3.88433	0.022576
						PITA_09487	-1.64635	0.0225896
						PITA_13982	-2.83849	0.0226624
						PITA_15067	-2.04464	0.0227432
						PITA_06458	-1.37579	0.0229085
						PITA_00479	-2.1359	0.0229457
						PITA_19748	-3.31097	0.0233559
						PITA_26947	-3.32973	0.0234309
						PITA_14082	-3.15565	0.0234309
						PITA_22314	-2.33036	0.0234309
						PITA_20669	-2.03416	0.0236265
						PITA_15174	-1.12783	0.0236558
						PITA_17965	-1.51923	0.0237133
						PITA_02423	-2.52916	0.0238087
						PITA_27518	-2.6336	0.0239842
						PITA_02521	-3.04148	0.024036
						PITA_40524	-3.81975	0.0241748
						PITA_50040	-1.15505	0.0242088
						PITA_37260	-1.95455	0.0242676
						PITA_41057	-3.14672	0.0242676
						PITA_19917	-1.05214	0.0243172
						PITA_43996	-3.28181	0.0243172
						PITA_41090	-5.20701	0.0244652
						PITA_39806	-1.43037	0.0244877
						PITA_49988	-3.17435	0.0246082
						PITA_22298	-2.31609	0.0248029
						PITA_07456	-1.74627	0.0248464
						PITA_12283	-2.88964	0.0251332
						PITA_44749	-3.27912	0.0252666
						PITA_26195	-2.82027	0.0253437
						PITA_17283	-2.69382	0.0254101
						PITA_15884	-3.02462	0.0255165
						PITA_42138	-1.77847	0.0255272
						PITA_47020	-1.35892	0.0256907
						PITA_13347	-3.40206	0.0259668
						PITA_06538	-4.65765	0.0261049
						PITA_00840	-1.3057	0.0261824
						PITA_13110	-2.53105	0.0262644
						PITA_03118	-2.01061	0.0262683
						PITA_06106	-1.77068	0.0262762
						PITA_30350	-4.32572	0.0266368
						PITA_49271	-5.16655	0.0266368
						PITA_39948	-4.32008	0.0266695
						PITA_04892	-2.54153	0.0268014
						PITA_15381	-4.52366	0.0269559
						PITA_15859	-4.57096	0.0270234
						PITA_34036	-3.5141	0.0270234
						PITA_38313	-2.1514	0.0272664
						PITA_23175	-2.59152	0.0272937
						PITA_25388	-1.83075	0.0273293
						PITA_11288	-4.40908	0.0273682
						PITA_17095	-3.60953	0.0273854
						PITA_15247	-2.59473	0.027626
						PITA_25625	-2.8901	0.0276733
						PITA_16133	-3.97412	0.0278316
						PITA_12011	-2.05451	0.0278316
						PITA_26711	-6.47843	0.0278354
						PITA_43351	-1.64115	0.0278613
						PITA_07352	-8.61514	0.0278613
						PITA_48060	-3.2243	0.0280127
						PITA_08780	-1.94434	0.0281648
						PITA_27052	-1.40952	0.028205
						PITA_05722	-2.87331	0.0282177
						PITA_46927	-1.2881	0.0283268
						PITA_47598	-1.27503	0.0288315
						PITA_26942	-3.60295	0.0288603
						PITA_32589	-3.17037	0.0289019
						PITA_28503	-3.45404	0.0289091
						PITA_12512	-3.15092	0.0290003
						PITA_11574	-7.33937	0.0290003
						PITA_06498	-2.48108	0.0290003
						PITA_05910	-3.3453	0.0290003
						PITA_45159	-2.13638	0.0290003
						PITA_26516	-3.06683	0.0290003
						PITA_15512	-2.56707	0.029137
						PITA_17833	-2.58812	0.0291589
						PITA_05362	-4.40238	0.0292413
						PITA_24715	-1.54323	0.0292571
						PITA_41191	-2.1196	0.0293255
						PITA_06397	-5.57485	0.0293255
						PITA_01914	-1.53265	0.0295074
						PITA_32151	-3.10325	0.0295911
						PITA_04332	-2.13692	0.029798
						PITA_42925	-3.45946	0.0298051
						PITA_10631	-2.92213	0.0301321
						PITA_46504	-1.42679	0.0303371
						PITA_33559	-4.57232	0.0303371
						PITA_44455	-4.00753	0.0304871
						PITA_35310	-1.80703	0.0307019
						PITA_45887	-1.54401	0.0307177
						PITA_50942	-2.02923	0.0308909
						PITA_12603	-3.50593	0.0309558
						PITA_00914	-3.02126	0.0310077
						PITA_31536	-2.1112	0.0310077
						PITA_34767	-1.50137	0.0310157
						PITA_36249	-1.30033	0.0312726
						PITA_17099	-3.23903	0.0312726
						PITA_06949	-1.94187	0.0312726
						PITA_20377	-1.92993	0.0313669
						PITA_19730	-2.35811	0.0313669
						PITA_08175	-2.89281	0.0313844
						PITA_35983	-2.54064	0.0313851
						PITA_04710	-1.11025	0.031643
						PITA_07727	-1.14118	0.0316598
						PITA_14474	-3.91789	0.0316598
						PITA_44769	-1.11627	0.0317481
						PITA_10976	-3.18156	0.0318576
						PITA_21507	-2.85652	0.031911
						PITA_22746	-2.46094	0.0319379
						PITA_45996	-2.04411	0.032028
						PITA_38461	-3.06306	0.0320346
						PITA_14937	-3.01329	0.0322081
						PITA_00394	-1.69723	0.0322081
						PITA_33398	-2.06751	0.0322081
						PITA_28664	-2.15557	0.0322081
						PITA_39624	-4.00006	0.0322081
						PITA_48120	-1.85488	0.0323285
						PITA_38960	-1.68226	0.032335
						PITA_45173	-1.79113	0.0323433
						PITA_32790	-0.987733	0.0326101
						PITA_45617	-8.63104	0.0326871
						PITA_03420	-5.33907	0.0327927
						PITA_23967	-2.64747	0.0328089
						PITA_22616	-1.71988	0.0328202
						PITA_00859	-1.93048	0.0328537
						PITA_27011	-2.25642	0.0328788
						PITA_32909	-4.38103	0.0330593
						PITA_45773	-4.29819	0.0331199
						PITA_45855	-1.10329	0.0331368
						PITA_04366	-1.30744	0.0331368
						PITA_12605	-1.47622	0.0331738
						PITA_46704	-1.13881	0.0332466
						PITA_44565	-1.59734	0.0332466
						PITA_22258	-1.95647	0.0334239
						PITA_16850	-2.71467	0.0334239
						PITA_11600	-1.28459	0.0335016
						PITA_16044	-2.75564	0.0335016
						PITA_36769	-3.58911	0.0335059
						PITA_11264	-2.35438	0.033598
						PITA_28261	-1.84436	0.0336469
						PITA_46207	-1.14182	0.0338652
						PITA_41228	-2.83755	0.0339348
						PITA_16466	-2.96498	0.0340341
						PITA_41367	-1.98036	0.0340541
						PITA_21001	-3.36529	0.034178
						PITA_11554	-3.61968	0.0341959
						PITA_43892	-1.21616	0.0341959
						PITA_49841	-2.74026	0.0342638
						PITA_01883	-2.90371	0.0342638
						PITA_45695	-3.06688	0.0342638
						PITA_17453	-2.82206	0.0343033
						PITA_00064	-3.01707	0.0344415
						PITA_11298	-5.41802	0.0346541
						PITA_23655	-2.03813	0.0346541
						PITA_23840	-1.50838	0.0346679
						PITA_22811	-4.26105	0.03491
						PITA_42343	-4.4462	0.0350632
						PITA_13101	-2.04716	0.0351105
						PITA_02534	-12.1713	0.0351413
						PITA_50453	-1.29189	0.0351471
						PITA_21124	-1.10053	0.0351471
						PITA_28890	-1.50186	0.0351719
						PITA_14865	-1.71488	0.035238
						PITA_47170	-2.29771	0.035238
						PITA_50654	-1.37635	0.035238
						PITA_16843	-5.69743	0.035412
						PITA_04105	-1.61791	0.0354792
						PITA_30724	-2.23841	0.0356804
						PITA_12433	-2.21632	0.0358004
						PITA_48554	-2.61878	0.0358004
						PITA_49121	-1.66404	0.03601
						PITA_42229	-1.39578	0.0364262
						PITA_38076	-2.00786	0.0365439
						PITA_50485	-3.47155	0.0365764
						PITA_25294	-2.65188	0.036586
						PITA_05454	-2.11591	0.037024
						PITA_40267	-1.09638	0.0371034
						PITA_29866	-2.22592	0.0371892
						PITA_23643	-1.18617	0.0373571
						PITA_43451	-1.64876	0.037468
						PITA_49749	-2.51011	0.0380632
						PITA_33451	-2.47584	0.0382747
						PITA_27128	-2.72195	0.0382747
						PITA_30091	-2.81786	0.038301
						PITA_28397	-1.4831	0.038301
						PITA_46082	-4.57361	0.038301
						PITA_18937	-2.05194	0.0383318
						PITA_40056	-1.8698	0.0383834
						PITA_43488	-4.19249	0.0383834
						PITA_43507	-2.21839	0.0384965
						PITA_05719	-3.01143	0.0385511
						PITA_00665	-1.83336	0.0387134
						PITA_31179	-1.91063	0.0388519
						PITA_33885	-5.28084	0.0389372
						PITA_34617	-1.49832	0.0393091
						PITA_17852	-4.67739	0.0394407
						PITA_49758	-2.43462	0.0395153
						PITA_05953	-3.67671	0.03962
						PITA_00576	-1.29802	0.0398948
						PITA_16681	-1.05959	0.0402132
						PITA_23226	-1.84319	0.0402909
						PITA_08744	-3.75195	0.0402946
						PITA_15561	-1.6916	0.0403221
						PITA_30173	-5.14949	0.0403548
						PITA_26309	-2.58579	0.0405161
						PITA_48502	-2.74811	0.0405161
						PITA_04324	-3.07902	0.0408606
						PITA_32789	-1.41865	0.0410185
						PITA_28942	-1.56213	0.0410315
						PITA_06644	-4.23483	0.0410619
						PITA_42840	-2.42478	0.0411354
						PITA_16805	-6.11359	0.0411839
						PITA_49488	-2.70455	0.0413731
						PITA_30959	-2.15882	0.0414967
						PITA_43179	-3.90952	0.0415709
						PITA_26451	-3.54713	0.0417265
						PITA_41940	-2.37833	0.0419153
						PITA_46572	-2.44614	0.0421088
						PITA_36118	-1.92642	0.0422033
						PITA_36443	-2.23283	0.0422351
						PITA_20298	-1.5691	0.0425432
						PITA_50571	-2.52889	0.0425797
						PITA_46065	-4.0074	0.0428157
						PITA_36271	-1.00192	0.0431417
						PITA_25650	-1.25991	0.0431417
						PITA_27767	-2.61427	0.0431965
						PITA_24965	-1.3575	0.0434586
						PITA_29445	-1.41309	0.0434652
						PITA_20414	-1.33266	0.0435929
						PITA_28609	-3.79935	0.043633
						PITA_19920	-1.35121	0.0436796
						PITA_03189	-2.60496	0.0436934
						PITA_20510	-1.73285	0.0436934
						PITA_31327	-3.70274	0.0441318
						PITA_44764	-3.39249	0.0441318
						PITA_37258	-1.44946	0.044198
						PITA_16673	-1.99177	0.044198
						PITA_47034	-1.12651	0.0442574
						PITA_09855	-3.32173	0.0449284
						PITA_45648	-1.02714	0.0449376
						PITA_37119	-4.452	0.045178
						PITA_38219	-4.42489	0.0451931
						PITA_16941	-1.46812	0.0451931
						PITA_15923	-1.8397	0.0452274
						PITA_42989	-2.4547	0.0456352
						PITA_33350	-2.64239	0.0457874
						PITA_24876	-3.22729	0.0458921
						PITA_12059	-2.15259	0.0459145
						PITA_18438	-1.20179	0.0461351
						PITA_00236	-2.18278	0.0462001
						PITA_33314	-3.16491	0.046381
						PITA_13059	-5.7396	0.04675
						PITA_42485	-4.07035	0.0470286
						PITA_05900	-1.07935	0.0470872
						PITA_18135	-5.86376	0.0471591
						PITA_51277	-1.1533	0.0471591
						PITA_45176	-0.919116	0.04719
						PITA_07210	-1.30666	0.0474997
						PITA_44000	-4.36168	0.0475483
						PITA_23103	-2.07452	0.0476015
						PITA_48503	-2.45116	0.0476298
						PITA_13416	-2.87479	0.0476387
						PITA_23878	-1.98571	0.0476387
						PITA_27439	-3.32472	0.0484583
						PITA_50844	-1.78967	0.0489335
						PITA_25694	-2.28397	0.0489335
						PITA_39616	-3.19032	0.0489601
						PITA_32901	-1.21664	0.0491288
						PITA_19234	-0.97315	0.0492089
						PITA_09430	-1.55145	0.0493439
						PITA_38708	-1.85293	0.0493439
						PITA_36508	-1.96396	0.0493991
						PITA_07239	-2.97415	0.0494567
						PITA_27624	-1.85126	0.0494567
						PITA_32703	-3.09002	0.0495863
						PITA_50700	-1.0019	0.0495863
						PITA_04618	-1.39657	0.0495871
						PITA_34321	-3.69902	0.0498014
						PITA_11273	-1.45773	0.0498014
						PITA_31212	-1.42562	0.0498157
						PITA_06743	-1.8322	0.0498157
						PITA_35430	-2.13268	0.0498157

## Sheet: Table S3
	Table S3: List of differentially expressed P. radiata genes.
	List of up-regulated P. radiata genes with log2(Fold-change) and corrected p-values (FDR)					List of down-regulated P. radiata genes with log2(Fold-change) and corrected p-values (FDR)
	Transcript ID	log2(Fold-Change)	FDR			Transcript ID	log2(Fold-Change)	FDR
	PITA_34884	4.78102	0.00381134			PITA_45043	-5.53196	0.000250825
	PITA_40828	3.75855	0.0115412			PITA_18936	-5.63787	0.000250825
	PITA_31619	3.66808	0.0116395			PITA_11559	-5.96131	0.000297502
	PITA_15675	3.65878	0.0127648			PITA_02843	-4.6323	0.000297502
	PITA_30872	3.45563	0.0232862			PITA_46363	-10.1089	0.000297502
	PITA_16307	1.2082	0.0279387			PITA_27375	-3.90468	0.000297502
	PITA_40276	1.24862	0.0288816			PITA_14470	-7.59815	0.000501921
	PITA_27143	3.73334	0.0303344			PITA_31270	-4.74077	0.000532254
	PITA_09326	3.29966	0.032805			PITA_11040	-9.29883	0.00058437
	PITA_50029	4.25028	0.0387398			PITA_09866	-9.40679	0.00058437
	PITA_21965	6.65119	0.0440768			PITA_51422	-3.5556	0.00067463
	PITA_06178	2.89054	0.0467419			PITA_14101	-6.03441	0.000690753
						PITA_21791	-8.77271	0.000951479
						PITA_26300	-4.40965	0.00106224
						PITA_03190	-4.83812	0.00107787
						PITA_07286	-3.5728	0.00123748
						PITA_38499	-7.12904	0.00123748
						PITA_44053	-7.34198	0.00123748
						PITA_40409	-9.88417	0.0012881
						PITA_07948	-8.79955	0.00146236
						PITA_46440	-7.77942	0.00146236
						PITA_11007	-6.24934	0.00146236
						PITA_13982	-5.10671	0.00150591
						PITA_06756	-5.49412	0.00155825
						PITA_41993	-4.25192	0.00162832
						PITA_07523	-3.55478	0.00162832
						PITA_08957	-5.41971	0.00162832
						PITA_48902	-4.91747	0.00164722
						PITA_10165	-4.48833	0.00164722
						PITA_21568	-11.1449	0.00164722
						PITA_21009	-6.46743	0.00164722
						PITA_33393	-9.16605	0.00164722
						PITA_12221	-2.98047	0.00189885
						PITA_46720	-4.79767	0.00189885
						PITA_38389	-7.43415	0.00190374
						PITA_13853	-5.9751	0.00201364
						PITA_19014	-5.99321	0.00201408
						PITA_07582	-3.46235	0.00210486
						PITA_15793	-5.34003	0.00215224
						PITA_47590	-5.03755	0.00215224
						PITA_15529	-7.11146	0.00222471
						PITA_12210	-4.72412	0.00227333
						PITA_33140	-3.60566	0.00227333
						PITA_32312	-4.90786	0.00227333
						PITA_41232	-4.62605	0.00227618
						PITA_06277	-3.09922	0.00227618
						PITA_50025	-3.86468	0.00235825
						PITA_29513	-4.75907	0.00246805
						PITA_02449	-2.3483	0.00249978
						PITA_25732	-5.09469	0.00255326
						PITA_43456	-8.54267	0.00255936
						PITA_43261	-7.52569	0.00262803
						PITA_49631	-5.56847	0.00273897
						PITA_45726	-4.8936	0.00273897
						PITA_06395	-5.2048	0.00274904
						PITA_36024	-6.68851	0.00279678
						PITA_47467	-3.19763	0.00289955
						PITA_26095	-5.54602	0.00290411
						PITA_10435	-3.98798	0.00302372
						PITA_51169	-8.6717	0.00310478
						PITA_31006	-6.26447	0.00310478
						PITA_07628	-5.30528	0.0034584
						PITA_02933	-6.74683	0.0034584
						PITA_47600	-6.48113	0.0034647
						PITA_07953	-3.51156	0.0034647
						PITA_03118	-4.16968	0.0034647
						PITA_08715	-3.38313	0.00358036
						PITA_17070	-2.32289	0.00370043
						PITA_14098	-8.3181	0.00381134
						PITA_20965	-6.08854	0.00381134
						PITA_16212	-6.19602	0.00381134
						PITA_41407	-3.61098	0.00403673
						PITA_38429	-4.71388	0.00414074
						PITA_40372	-6.95836	0.00429911
						PITA_27400	-7.31204	0.00440407
						PITA_04185	-10.466	0.0045275
						PITA_17856	-2.85294	0.0045275
						PITA_07159	-5.96896	0.00453334
						PITA_40960	-7.04577	0.00472701
						PITA_03212	-2.82664	0.00497612
						PITA_12330	-4.95975	0.00500212
						PITA_13110	-4.47272	0.00518099
						PITA_42681	-4.71389	0.00518099
						PITA_45156	-5.4476	0.00518255
						PITA_46887	-4.56249	0.00540876
						PITA_01475	-9.91642	0.00541104
						PITA_15515	-7.78157	0.00541484
						PITA_02900	-5.25925	0.00548624
						PITA_24968	-6.37798	0.00569201
						PITA_51399	-6.49736	0.00569201
						PITA_47429	-2.75709	0.00569201
						PITA_01611	-8.4502	0.00569201
						PITA_48927	-10.2827	0.00585007
						PITA_03001	-3.79203	0.00586927
						PITA_50420	-2.75753	0.00603311
						PITA_04055	-5.05532	0.00611923
						PITA_39027	-6.65005	0.00611923
						PITA_33350	-5.11784	0.00611923
						PITA_15370	-5.05486	0.00616889
						PITA_29927	-4.00995	0.00629951
						PITA_25287	-3.15714	0.0064232
						PITA_09928	-8.72862	0.00671829
						PITA_50252	-4.0912	0.00671829
						PITA_17289	-3.42061	0.00671829
						PITA_44262	-3.97535	0.00685104
						PITA_33885	-8.03934	0.00718405
						PITA_39622	-6.31558	0.00724705
						PITA_05666	-5.569	0.00730703
						PITA_19361	-5.31059	0.0074536
						PITA_28856	-6.46334	0.00749942
						PITA_22957	-4.52726	0.00749942
						PITA_31275	-4.20646	0.00749942
						PITA_45803	-4.33655	0.00749942
						PITA_15074	-3.1013	0.00749942
						PITA_08785	-7.38263	0.00763063
						PITA_28439	-5.05049	0.0076999
						PITA_38279	-4.97349	0.00774573
						PITA_12856	-3.07644	0.00774573
						PITA_04283	-3.62026	0.00787745
						PITA_24382	-9.29525	0.00787745
						PITA_21594	-4.86773	0.00789752
						PITA_18813	-3.69273	0.00816094
						PITA_13926	-8.53937	0.00824997
						PITA_30537	-4.30004	0.00824997
						PITA_20841	-11.5223	0.00824997
						PITA_36950	-3.01587	0.00824997
						PITA_48672	-3.91851	0.00824997
						PITA_24456	-4.95869	0.00824997
						PITA_34642	-4.41697	0.00824997
						PITA_20803	-4.11546	0.00824997
						PITA_07086	-3.05592	0.00831841
						PITA_36392	-2.30604	0.00837555
						PITA_22535	-7.96457	0.00837555
						PITA_35369	-2.13557	0.00838928
						PITA_33104	-5.28153	0.00861814
						PITA_45657	-3.88331	0.00861814
						PITA_33346	-3.84702	0.00861814
						PITA_04872	-2.4158	0.00862696
						PITA_45663	-7.12866	0.0087281
						PITA_04324	-5.08819	0.00877507
						PITA_30206	-4.58135	0.00877507
						PITA_28122	-2.28825	0.00877507
						PITA_03602	-4.33453	0.00884805
						PITA_44646	-3.88169	0.00896957
						PITA_07330	-3.98236	0.00917632
						PITA_05792	-5.95299	0.00941861
						PITA_13390	-3.15254	0.00959323
						PITA_04854	-6.34782	0.00991276
						PITA_26934	-5.49978	0.0100582
						PITA_20479	-3.8313	0.0101889
						PITA_37368	-5.90044	0.0102223
						PITA_32538	-4.14983	0.0104068
						PITA_32275	-3.10957	0.0104068
						PITA_35702	-11.1136	0.0104068
						PITA_14694	-4.99141	0.0104068
						PITA_39987	-2.33646	0.0104426
						PITA_49036	-4.24945	0.0106015
						PITA_29940	-4.25194	0.0106015
						PITA_32771	-2.8991	0.0106015
						PITA_14937	-4.76926	0.0106067
						PITA_20975	-4.26576	0.0106067
						PITA_44354	-4.88928	0.0106545
						PITA_34978	-8.29778	0.0107613
						PITA_22445	-4.81729	0.0109257
						PITA_26857	-2.66605	0.0110792
						PITA_14575	-3.13003	0.0111757
						PITA_24601	-2.58692	0.0114277
						PITA_40139	-7.83315	0.0115091
						PITA_35098	-1.68802	0.0115412
						PITA_42897	-2.22615	0.0115821
						PITA_43996	-5.41089	0.0116485
						PITA_02971	-6.31711	0.0117563
						PITA_36263	-3.63776	0.0120015
						PITA_01270	-6.81023	0.0120553
						PITA_12198	-1.86	0.0120981
						PITA_26185	-2.36297	0.0121712
						PITA_33325	-3.77853	0.0121712
						PITA_45274	-4.67896	0.0126379
						PITA_17164	-5.90295	0.0126379
						PITA_47471	-2.61223	0.0126649
						PITA_38154	-6.21984	0.0127085
						PITA_43247	-2.70273	0.0127085
						PITA_18206	-5.55512	0.0127085
						PITA_49042	-8.18188	0.0127085
						PITA_26369	-2.53274	0.0130717
						PITA_15514	-4.0775	0.0130721
						PITA_26164	-3.09881	0.0130721
						PITA_19292	-3.46801	0.0130721
						PITA_37728	-3.87943	0.0130915
						PITA_50059	-2.95262	0.0130915
						PITA_06858	-4.66856	0.0131809
						PITA_09129	-2.03289	0.0132995
						PITA_16292	-4.48816	0.0134528
						PITA_48519	-5.9226	0.0134528
						PITA_42452	-2.92714	0.0137007
						PITA_12148	-3.80051	0.0137274
						PITA_27863	-3.92601	0.0150741
						PITA_47130	-4.71617	0.0151147
						PITA_19617	-2.23217	0.0151147
						PITA_02628	-6.20168	0.0151816
						PITA_07261	-4.92167	0.0151816
						PITA_00500	-4.76465	0.0153096
						PITA_39833	-2.06241	0.0156104
						PITA_20665	-8.83215	0.0156259
						PITA_43561	-3.57707	0.0158243
						PITA_30029	-3.08287	0.0162927
						PITA_27991	-3.96202	0.0164194
						PITA_26648	-4.20356	0.0165841
						PITA_20535	-4.28922	0.0165841
						PITA_46065	-7.42646	0.0165841
						PITA_04882	-5.28877	0.0165896
						PITA_18094	-4.22686	0.0166805
						PITA_32589	-4.45765	0.0166805
						PITA_28489	-1.48923	0.0166805
						PITA_02979	-1.21603	0.0166805
						PITA_44205	-4.64587	0.0166805
						PITA_26944	-8.93784	0.0167074
						PITA_22697	-5.04422	0.0167201
						PITA_42605	-4.9492	0.0171553
						PITA_09818	-3.23089	0.0171553
						PITA_42178	-7.25653	0.0175495
						PITA_48713	-3.84313	0.0177396
						PITA_32756	-5.74909	0.0177396
						PITA_46830	-2.65844	0.0181456
						PITA_32240	-4.66107	0.0182609
						PITA_03968	-4.26047	0.0182756
						PITA_15611	-4.61783	0.0182756
						PITA_11288	-8.45807	0.0190341
						PITA_16571	-8.33914	0.0190653
						PITA_17364	-2.6061	0.0190653
						PITA_34562	-4.96232	0.0191045
						PITA_13442	-2.5819	0.0191045
						PITA_47560	-4.82054	0.0191045
						PITA_27636	-2.25309	0.0191366
						PITA_30142	-1.55952	0.0191796
						PITA_38559	-6.81407	0.0191796
						PITA_26516	-4.25946	0.0197757
						PITA_16417	-1.58157	0.0198695
						PITA_10571	-1.96889	0.0199157
						PITA_47216	-4.57033	0.0199935
						PITA_39044	-1.90414	0.020197
						PITA_34591	-2.1126	0.020197
						PITA_30628	-5.11198	0.020197
						PITA_43488	-7.50346	0.020197
						PITA_02146	-7.05351	0.020197
						PITA_02298	-5.94072	0.020197
						PITA_03689	-4.21773	0.020197
						PITA_04637	-5.56129	0.0203652
						PITA_20670	-4.24026	0.0206596
						PITA_02760	-2.58968	0.0206596
						PITA_23461	-4.51321	0.0209534
						PITA_09371	-3.57392	0.0209534
						PITA_15139	-4.30951	0.0212626
						PITA_06213	-2.37219	0.0214429
						PITA_29869	-4.61569	0.0214429
						PITA_35312	-4.81149	0.021799
						PITA_15438	-1.48311	0.021799
						PITA_23474	-3.75213	0.0219074
						PITA_36118	-2.62841	0.0222237
						PITA_44727	-4.66882	0.0230026
						PITA_16673	-4.0998	0.0231149
						PITA_35728	-2.38677	0.0231149
						PITA_47910	-2.66928	0.0231149
						PITA_31344	-3.01651	0.0231149
						PITA_48142	-3.85085	0.0232862
						PITA_29147	-7.34692	0.0232862
						PITA_42010	-4.14369	0.0232862
						PITA_43712	-4.09229	0.0232862
						PITA_26711	-7.66089	0.0232862
						PITA_09438	-5.01013	0.0238162
						PITA_24356	-4.46565	0.0241009
						PITA_30428	-3.65063	0.0241009
						PITA_27469	-4.36088	0.0242401
						PITA_16805	-12.5473	0.0243023
						PITA_36113	-2.97018	0.0255586
						PITA_44729	-3.68994	0.0255586
						PITA_31261	-4.17565	0.0255586
						PITA_23709	-3.59198	0.0255586
						PITA_41069	-4.04289	0.0257236
						PITA_30044	-3.05416	0.0257236
						PITA_39290	-2.57479	0.0258012
						PITA_12684	-2.77528	0.0260556
						PITA_27518	-3.41051	0.0260894
						PITA_09829	-2.45537	0.0260894
						PITA_49841	-4.57954	0.0260894
						PITA_03732	-1.81878	0.0261916
						PITA_02153	-2.24642	0.026513
						PITA_20030	-3.0156	0.026513
						PITA_07613	-5.0384	0.0267051
						PITA_42087	-7.22796	0.0271065
						PITA_36140	-4.20193	0.0279387
						PITA_03438	-4.61213	0.0279387
						PITA_48428	-2.37061	0.0279387
						PITA_46082	-3.36758	0.0279387
						PITA_10385	-4.05455	0.0286364
						PITA_49166	-1.27736	0.0287664
						PITA_36170	-1.29703	0.0287664
						PITA_41209	-2.52286	0.0293978
						PITA_47196	-5.11002	0.0298003
						PITA_11550	-5.24953	0.0304227
						PITA_48568	-5.25147	0.030809
						PITA_20052	-4.45856	0.0310476
						PITA_49380	-2.48887	0.0319658
						PITA_10572	-4.76737	0.032236
						PITA_10216	-2.77053	0.032236
						PITA_23254	-3.28757	0.0324433
						PITA_11298	-8.54793	0.0324533
						PITA_09855	-7.4242	0.0324533
						PITA_10220	-2.69149	0.0328321
						PITA_25465	-1.72123	0.0328321
						PITA_21557	-3.2342	0.0331167
						PITA_33135	-2.97274	0.0331167
						PITA_13688	-3.34003	0.0360352
						PITA_03993	-2.69818	0.0360352
						PITA_12283	-7.04043	0.0360352
						PITA_31660	-7.17816	0.0363119
						PITA_16712	-5.42293	0.0368569
						PITA_01886	-6.47729	0.0374908
						PITA_23718	-3.68035	0.0376746
						PITA_02168	-5.13323	0.0381578
						PITA_20669	-2.54813	0.0393774
						PITA_40371	-3.49635	0.0393774
						PITA_51111	-2.79891	0.0399189
						PITA_03845	-3.20958	0.0400554
						PITA_11995	-1.85777	0.0403794
						PITA_29241	-3.71228	0.0404867
						PITA_00797	-1.48093	0.0405425
						PITA_43967	-4.62202	0.0407772
						PITA_46450	-2.2702	0.0407772
						PITA_33332	-2.17094	0.0407832
						PITA_08271	-5.3483	0.0411076
						PITA_31536	-2.61425	0.0414531
						PITA_42578	-2.32162	0.0419933
						PITA_02460	-4.01423	0.0419933
						PITA_01641	-4.40661	0.0423828
						PITA_37252	-4.04647	0.0424644
						PITA_28869	-4.45986	0.0430787
						PITA_10418	-7.72625	0.0430787
						PITA_04341	-3.37086	0.0439899
						PITA_17723	-3.64321	0.0440768
						PITA_25897	-1.30874	0.0440935
						PITA_41471	-2.3003	0.0444981
						PITA_42852	-1.76356	0.0453806
						PITA_07161	-2.43189	0.0453806
						PITA_19393	-4.72581	0.045408
						PITA_02646	-4.26386	0.0455075
						PITA_15067	-1.85424	0.0464307
						PITA_22746	-3.3656	0.0465814
						PITA_25422	-3.41274	0.0466175
						PITA_30063	-1.54151	0.0467419
						PITA_22694	-3.39734	0.0467419
						PITA_22794	-5.2048	0.0467419
						PITA_18875	-3.8428	0.0467419
						PITA_25910	-2.89209	0.0467419
						PITA_35674	-5.0214	0.0476563
						PITA_37259	-6.88998	0.0484043
						PITA_33500	-6.36498	0.0485785
						PITA_40236	-2.95007	0.0491661
						PITA_38145	-1.54352	0.0491843

## Sheet: Table S4
	Table S4: List of differentially expressed genes of Fusarium circinatum.
	List of up-regulated genes with log2(Fold-change) and corrected p-values (FDR)					List of down-regulated genes with log2(Fold-change) and corrected p-values (FDR)
	Transcript ID	log2(Fold-Change)	FDR			Transcript ID	log2(Fold-Change)	FDR
	FC072V.4731.2	10.4952	0.00452036			FC072V.9449.1	-3.61125	0.000361553
	FC072V.9009.1	3.36517	0.00526949			FC072V.213.1	-4.1585	0.00236968
	FC072V.432.1	9.92499	0.00870166			FC072V.7235.1	-2.5451	0.00275193
	FC072V.4162.1	3.43097	0.00918065			FC072V.10055.1	-8.60299	0.00275193
	FC072V.10145.1	3.47634	0.00918065			FC072V.2290.1	-4.15101	0.00496286
	FC072V.6315.1	3.12812	0.00918065			FC072V.2465.1	-2.57896	0.00918065
	FC072V.181.2	10.748	0.0110396			FC072V.1860.1	-1.7162	0.00918065
	FC072V.5897.1	3.02011	0.0110396			FC072V.2280.1	-2.18743	0.00918065
	FC072V.5982.1	2.92654	0.0123017			FC072V.7881.1	-2.40211	0.00918065
	FC072V.10590.1	2.94377	0.0125417			FC072V.7626.1	-1.72708	0.00918065
	FC072V.10386.1	9.57139	0.013007			FC072V.1781.1	-2.02242	0.00918065
	FC072V.8444.2	10.0411	0.0133891			FC072V.1196.1	-1.91547	0.00918065
	FC072V.9260.1	1.66003	0.014406			FC072V.1635.1	-5.44063	0.0100702
	FC072V.1346.1	10.1219	0.014406			FC072V.854.1	-6.36902	0.0100702
	FC072V.6261.1	3.22665	0.0145698			FC072V.10634.2	-3.40229	0.0100702
	FC072V.1021.1	9.38742	0.0145698			FC072V.6542.1	-9.86768	0.0103296
	FC072V.8903.1	2.29299	0.0145698			FC072V.2484.1	-7.52385	0.0110396
	FC072V.7451.1	4.08906	0.0145698			FC072V.8383.1	-3.12237	0.0125417
	FC072V.3431.1	11.0589	0.0145698			FC072V.7844.1	-1.50745	0.0133891
	FC072V.6544.1	2.17106	0.0145698			FC072V.8326.1	-2.04288	0.0145698
	FC072V.6351.2	9.27545	0.0145698			FC072V.4707.1	-3.38217	0.0145698
	FC072V.4370.1	1.85579	0.0145698			FC072V.1987.1	-3.1806	0.0145698
	FC072V.7676.1	2.71024	0.0145707			FC072V.4784.1	-1.53955	0.0145698
	FC072V.9390.2	9.73091	0.0145707			FC072V.1988.1	-1.82312	0.0145698
	FC072V.581.2	9.63635	0.0154651			FC072V.9995.1	-1.36553	0.0145698
	FC072V.8466.1	2.64035	0.0154651			FC072V.7209.1	-2.5787	0.0145698
	FC072V.925.1	1.98388	0.0157072			FC072V.6441.1	-2.15414	0.0145698
	FC072V.5917.1	6.16559	0.0163255			FC072V.8775.1	-5.92708	0.0145698
	FC072V.10692.3	9.77094	0.0179374			FC072V.1467.1	-7.13581	0.0145698
	FC072V.481.1	2.5626	0.0180906			FC072V.5759.1	-3.27235	0.0145698
	FC072V.4445.1	9.83691	0.0183193			FC072V.921.1	-2.05378	0.0145698
	FC072V.2911.1	2.12659	0.0188368			FC072V.6539.1	-6.90373	0.0145707
	FC072V.6328.1	2.68114	0.0193854			FC072V.8774.1	-6.70822	0.0145707
	FC072V.284.1	2.57302	0.0198689			FC072V.5984.1	-2.03564	0.0149617
	FC072V.9379.1	1.75304	0.021214			FC072V.5118.1	-1.30878	0.0156466
	FC072V.4946.1	1.74529	0.0219028			FC072V.5583.1	-4.08383	0.0163255
	FC072V.7618.2	10.3783	0.0219028			FC072V.6299.1	-1.47102	0.0180906
	FC072V.1366.1	2.68224	0.0219028			FC072V.5547.1	-5.83961	0.0180906
	FC072V.8946.2	5.48619	0.0223949			FC072V.9443.1	-7.15093	0.0183193
	FC072V.1831.1	9.66844	0.0225711			FC072V.9212.1	-1.14553	0.0191301
	FC072V.6254.1	2.75388	0.0227576			FC072V.8325.1	-2.14994	0.0200106
	FC072V.4603.1	1.52986	0.0230708			FC072V.8387.1	-8.72692	0.0219028
	FC072V.766.2	9.39544	0.0232797			FC072V.6572.1	-8.59029	0.0234102
	FC072V.2828.1	3.34278	0.0234102			FC072V.7080.1	-1.3972	0.023453
	FC072V.8057.1	1.59923	0.0249185			FC072V.703.1	-2.63162	0.0238138
	FC072V.8523.1	2.02502	0.0249185			FC072V.3749.1	-1.86986	0.0238138
	FC072V.1478.1	5.57171	0.0249185			FC072V.217.1	-3.39365	0.0241235
	FC072V.5544.1	2.77088	0.0251309			FC072V.5291.1	-9.28392	0.0251309
	FC072V.5461.1	3.10221	0.0252591			FC072V.1579.1	-3.49885	0.0251309
	FC072V.8993.1	1.69405	0.0252591			FC072V.1472.1	-4.55359	0.0251309
	FC072V.4714.1	9.5732	0.0252591			FC072V.10222.1	-1.76316	0.0251309
	FC072V.7822.1	4.58335	0.0259677			FC072V.10162.1	-1.70834	0.0252591
	FC072V.7031.1	2.91331	0.0259677			FC072V.6616.1	-2.42192	0.0252591
	FC072V.3549.1	2.40425	0.0260986			FC072V.8503.1	-3.97531	0.0258586
	FC072V.7452.1	4.33312	0.030018			FC072V.7012.1	-2.66078	0.0263326
	FC072V.7607.1	2.57278	0.0306093			FC072V.2489.1	-4.64367	0.0298475
	FC072V.4698.1	2.80468	0.0309593			FC072V.105.1	-6.20337	0.0298475
	FC072V.1502.1	3.18333	0.0320028			FC072V.419.1	-3.9029	0.0301284
	FC072V.5306.1	3.27116	0.0326645			FC072V.1132.1	-3.6368	0.0329429
	FC072V.3888.1	5.97945	0.0329429			FC072V.2635.1	-8.77293	0.0329429
	FC072V.4749.1	8.64554	0.0329429			FC072V.1813.1	-1.12978	0.0346667
	FC072V.6308.1	2.12715	0.0330014			FC072V.5162.1	-1.67138	0.036873
	FC072V.1888.1	2.7772	0.034206			FC072V.3599.1	-1.37795	0.0382433
	FC072V.2770.1	8.6705	0.034206			FC072V.260.1	-5.6828	0.0387822
	FC072V.5957.1	1.80888	0.034206			FC072V.5809.1	-4.27435	0.0388284
	FC072V.9543.1	3.33866	0.0346831			FC072V.7238.1	-1.52457	0.0399496
	FC072V.3012.1	8.80945	0.0346831			FC072V.6741.1	-1.35901	0.0399496
	FC072V.1249.1	5.07453	0.0346831			FC072V.9098.1	-7.71	0.040266
	FC072V.553.1	2.2596	0.0350425			FC072V.367.1	-8.75191	0.0415474
	FC072V.10385.1	5.2602	0.0355889			FC072V.6987.1	-3.09311	0.0418393
	FC072V.8356.1	1.60009	0.0355889			FC072V.8502.1	-1.81482	0.0420989
	FC072V.1286.1	1.79288	0.0356728			FC072V.7865.1	-4.35878	0.0422958
	FC072V.2154.1	1.45839	0.0378713			FC072V.4470.1	-1.20646	0.0431492
	FC072V.5671.1	2.4925	0.0387822			FC072V.7981.1	-1.45859	0.0431492
	FC072V.2692.1	2.09145	0.0387822			FC072V.2490.1	-6.0843	0.0431492
	FC072V.7630.1	2.80403	0.040266			FC072V.8772.1	-1.84323	0.0431492
	FC072V.763.1	1.63296	0.040266			FC072V.2227.1	-1.44305	0.0431492
	FC072V.4544.1	1.31887	0.040266			FC072V.3583.1	-1.37776	0.0432469
	FC072V.2839.1	2.37024	0.040266			FC072V.41.1	-2.13907	0.0443482
	FC072V.878.1	6.41644	0.040266			FC072V.8327.1	-1.82528	0.0450184
	FC072V.4822.1	9.12765	0.0409248			FC072V.1837.1	-2.84156	0.0458706
	FC072V.3497.1	1.92467	0.0415474			FC072V.5129.1	-1.15935	0.0460285
	FC072V.9780.1	5.45194	0.0415474			FC072V.10222.2	-1.99142	0.047175
	FC072V.8475.1	8.90471	0.0418393			FC072V.2463.1	-4.17893	0.0473068
	FC072V.7342.1	2.10235	0.0425547			FC072V.5045.1	-5.61625	0.0481423
	FC072V.2804.1	5.54272	0.0431492			FC072V.212.1	-6.42569	0.0481423
	FC072V.9764.1	9.0968	0.0431492
	FC072V.5299.1	2.50951	0.0431492
	FC072V.6733.1	1.78174	0.0431492
	FC072V.5272.1	3.76462	0.0431492
	FC072V.5332.1	2.42129	0.0432469
	FC072V.5188.1	8.21851	0.0436237
	FC072V.5421.1	1.45443	0.0436237
	FC072V.6039.2	8.23233	0.0439308
	FC072V.2557.1	1.63136	0.0444202
	FC072V.10630.1	1.92494	0.0453966
	FC072V.9561.1	4.24109	0.0460285
	FC072V.10406.1	2.53049	0.046414
	FC072V.3948.1	8.19215	0.046531
	FC072V.4350.1	1.40405	0.046531
	FC072V.10462.1	8.27564	0.0469718
	FC072V.9630.1	1.87046	0.0469718
	FC072V.9540.1	8.59036	0.0469718
	FC072V.2509.1	10.0643	0.0469718
	FC072V.4602.1	1.88035	0.047175
	FC072V.5133.1	2.96482	0.0473068
	FC072V.9955.1	1.55067	0.0473068
	FC072V.6329.1	1.6347	0.0473068
	FC072V.5696.1	2.44691	0.0483347
	FC072V.3971.1	8.93205	0.0483357
	FC072V.6257.1	2.78717	0.0483357
	FC072V.7230.1	8.35446	0.0483357
	FC072V.7828.1	8.34306	0.0489759
	FC072V.1723.1	5.57471	0.0489759
	FC072V.10246.1	8.73905	0.0489759
	FC072V.9166.1	1.09629	0.0489759
	FC072V.1593.1	8.54998	0.0489759
	FC072V.5599.1	5.38884	0.0495799

## Sheet: Table S5
Table S5: Final result of the EnTAP annotation for the Fusarium circinatum transcriptome
Query Sequence	Frame	Subject Sequence	Percent Identical	Alignment Length	Mismatches	Gap Openings	Query Start	Query End	Subject Start	Subject End	E Value	Coverage	Description	Species	Taxonomic Lineage	Origin Database	Contaminant	Informative	UniProt GO Biological	UniProt GO Cellular	UniProt GO Molecular	UniProt KEGG Terms	UniProt Database Cross Reference	UniProt Additional Information	Seed Ortholog	Seed E-Value	Seed Score	Predicted Gene	Tax Scope	Tax Scope Max	Member OGs	KEGG Terms	GO Biological	GO Cellular	GO Molecular	IPScan GO Biological	IPScan GO Cellular	IPScan GO Molecular	Pathways	InterPro	Protein Database	Protein Description	E-Value
FC072V.10762.1	Complete	KAF5664100.1	99.7	378	1	0	1	378	1	378	1.4e-211	100	KAF5664100.1 polygalacturonase [Fusarium circinatum]	fusarium circinatum	fusarium circinatum;fusarium fujikuroi species complex;fusarium;nectriaceae;hypocreales;hypocreomycetidae;sordariomycetes;sordariomyceta;leotiomyceta;pezizomycotina;saccharomyceta;ascomycota;dikarya;fungi;opisthokonta;eukaryota;cellular organisms;root	/LUSTRE/HOME/uva_dpvrf_1/uva_dpvrf_1_3/annotation/entap_outfiles/similarity_search/DIAMOND/blastp_transcripts_fc072v_final_nr.out	No	Yes							117187.FVEG_08451T0	3.2e-207	726.1	FG03194.1	Fungi	fuNOG[21]	03PMY@ascNOG,0IE38@euNOG,0PMNA@fuNOG,0S9YM@hypNOG,0WUKY@necNOG,13P8U@opiNOG,1A5KT@sordNOG,COG5434@NOG	405001100	GO:0000272-polysaccharide catabolic process(L=5),GO:0005975-carbohydrate metabolic process(L=3),GO:0005976-polysaccharide metabolic process(L=4),GO:0008150-biological_process(L=0),GO:0008152-metabolic process(L=1),GO:0009056-catabolic process(L=2),GO:0009057-macromolecule catabolic process(L=4),GO:0010393-galacturonan metabolic process(L=5),GO:0016052-carbohydrate catabolic process(L=4),GO:004317…	GO:0005575-cellular_component(L=0),GO:0005576-extracellular region(L=1),	GO:0003674-molecular_function(L=0),GO:0003824-catalytic activity(L=1),GO:0004553-hydrolase activity, hydrolyzing O-glycosyl compounds(L=4),GO:0004650-polygalacturonase activity(L=5),GO:0016787-hydrolase activity(L=2),GO:0016798-hydrolase activity, acting on glycosyl bonds(L=3),	GO:0005975-carbohydrate metabolic process(L=3),		GO:0004650-polygalacturonase activity(L=5),		IPR000743(Glycoside hydrolase, family 28)	Pfam	PF00295(Glycosyl hydrolases family 28)	2e-99
FC072V.10760.1	Complete	KAF5664090.1	99.7	574	2	0	1	574	1	574	0	100	KAF5664090.1 myo-inositol transport ITR1 [Fusarium circinatum]	fusarium circinatum	fusarium circinatum;fusarium fujikuroi species complex;fusarium;nectriaceae;hypocreales;hypocreomycetidae;sordariomycetes;sordariomyceta;leotiomyceta;pezizomycotina;saccharomyceta;ascomycota;dikarya;fungi;opisthokonta;eukaryota;cellular organisms;root	/LUSTRE/HOME/uva_dpvrf_1/uva_dpvrf_1_3/annotation/entap_outfiles/similarity_search/DIAMOND/blastp_transcripts_fc072v_final_nr.out	No	Yes							117187.FVEG_08441T0	0	1115.9	FRT1	Fungi	fuNOG[21]	03JMK@ascNOG,0PGQD@fuNOG,0SEIT@hypNOG,0WYMX@necNOG,0XNQK@NOG,12WNE@opiNOG,19K3J@sordNOG,KOG0254@euNOG		GO:0006810-transport(L=3),GO:0007275-multicellular organism development(L=3),GO:0008150-biological_process(L=0),GO:0008643-carbohydrate transport(L=4),GO:0009987-cellular process(L=1),GO:0032501-multicellular organismal process(L=1),GO:0032502-developmental process(L=1),GO:0043581-obsolete mycelium development(L=),GO:0044699-single-organism process(L=1),GO:0044707-single-multicellular organism pr…	GO:0005575-cellular_component(L=0),GO:0016020-membrane(L=1),GO:0016021-integral component of membrane(L=4),GO:0031224-intrinsic component of membrane(L=3),GO:0044425-membrane part(L=2),	GO:0003674-molecular_function(L=0),GO:0005215-transporter activity(L=1),GO:0022857-transmembrane transporter activity(L=2),GO:0022891-substrate-specific transmembrane transporter activity(L=3),GO:0022892-substrate-specific transporter activity(L=2),	GO:0055085-transmembrane transport(L=4),	GO:0016021-integral component of membrane(L=4),	GO:0022857-transmembrane transporter activity(L=2),		IPR005828(Major facilitator, sugar transporter-like)	Pfam	PF00083(Sugar (and other) transporter)	3.9e-81
FC072V.10758.1	Partial 5 Prime	KAF5546819.1	94.6	448	22	1	1	448	331	776	1.1e-231	99.6	KAF5546819.1 phosphatidic acid-preferring phospholipase A1 contains DDHD domain-containing protein [Fusarium phyllophilum]	fusarium phyllophilum	fusarium phyllophilum;fusarium fujikuroi species complex;fusarium;nectriaceae;hypocreales;hypocreomycetidae;sordariomycetes;sordariomyceta;leotiomyceta;pezizomycotina;saccharomyceta;ascomycota;dikarya;fungi;opisthokonta;eukaryota;cellular organisms;root	/LUSTRE/HOME/uva_dpvrf_1/uva_dpvrf_1_3/annotation/entap_outfiles/similarity_search/DIAMOND/blastp_transcripts_fc072v_final_nr.out	No	Yes							5518.FGSG_13663P0	1.4e-182	644.4	PGUG_02916	Fungi	fuNOG[21]	03ICA@ascNOG,0PFD2@fuNOG,0SN4A@hypNOG,0WVZY@necNOG,0YDSX@NOG,12QAH@opiNOG,19K56@sordNOG,KOG2308@euNOG		GO:0000154-rRNA modification(L=7),GO:0001510-RNA methylation(L=4),GO:0006139-nucleobase-containing compound metabolic process(L=3),GO:0006364-rRNA processing(L=7),GO:0006396-RNA processing(L=5),GO:0006629-lipid metabolic process(L=3),GO:0006725-cellular aromatic compound metabolic process(L=3),GO:0006807-nitrogen compound metabolic process(L=2),GO:0007154-cell communication(L=2),GO:0008150-biolog…	GO:0005575-cellular_component(L=0),GO:0005622-intracellular(L=3),GO:0005623-cell(L=1),GO:0005737-cytoplasm(L=4),GO:0005739-mitochondrion(L=5),GO:0043226-organelle(L=1),GO:0043227-membrane-bounded organelle(L=2),GO:0043229-intracellular organelle(L=3),GO:0043231-intracellular membrane-bounded organelle(L=4),GO:0044424-intracellular part(L=3),GO:0044444-cytoplasmic part(L=4),GO:0044464-cell part(L=…	GO:0003674-molecular_function(L=0),GO:0003824-catalytic activity(L=1),GO:0004620-phospholipase activity(L=5),GO:0005488-binding(L=1),GO:0005543-phospholipid binding(L=3),GO:0008168-methyltransferase activity(L=4),GO:0008171-O-methyltransferase activity(L=5),GO:0008173-RNA methyltransferase activity(L=5),GO:0008289-lipid binding(L=2),GO:0008374-O-acyltransferase activity(L=5),GO:0008649-rRNA methy…			GO:0046872-metal ion binding(L=4),		IPR004177(DDHD domain)	Pfam	PF02862(DDHD domain)	2.1e-73
FC072V.10753.1	Complete	KAF5689995.1	100	261	0	0	1	261	1	261	1.9e-146	100	KAF5689995.1 ring finger [Fusarium circinatum]	fusarium circinatum	fusarium circinatum;fusarium fujikuroi species complex;fusarium;nectriaceae;hypocreales;hypocreomycetidae;sordariomycetes;sordariomyceta;leotiomyceta;pezizomycotina;saccharomyceta;ascomycota;dikarya;fungi;opisthokonta;eukaryota;cellular organisms;root	/LUSTRE/HOME/uva_dpvrf_1/uva_dpvrf_1_3/annotation/entap_outfiles/similarity_search/DIAMOND/blastp_transcripts_fc072v_final_nr.out	No	Yes							117187.FVEG_02573T0	2.3e-140	503.4		Fungi	fuNOG[21]	03SW5@ascNOG,0IZIY@euNOG,0PQ9S@fuNOG,0SJK1@hypNOG,0WY5F@necNOG,0Y6GY@NOG,13TBV@opiNOG,19RJP@sordNOG				GO:0003674-molecular_function(L=0),GO:0005488-binding(L=1),GO:0008270-zinc ion binding(L=6),GO:0043167-ion binding(L=2),GO:0043169-cation binding(L=3),GO:0046872-metal ion binding(L=4),GO:0046914-transition metal ion binding(L=5),
FC072V.10755.1	Complete	KAF4438807.1	100	648	0	0	1	648	15	662	0	100	KAF4438807.1 fimbrin [Fusarium acutatum]	fusarium acutatum	fusarium acutatum;fusarium fujikuroi species complex;fusarium;nectriaceae;hypocreales;hypocreomycetidae;sordariomycetes;sordariomyceta;leotiomyceta;pezizomycotina;saccharomyceta;ascomycota;dikarya;fungi;opisthokonta;eukaryota;cellular organisms;root	/LUSTRE/HOME/uva_dpvrf_1/uva_dpvrf_1_3/annotation/entap_outfiles/similarity_search/DIAMOND/blastp_transcripts_fc072v_final_nr.out	No	Yes							5507.FOXG_05565P0	0	1262.3		Fungi	fuNOG[21]	03K03@ascNOG,0PGNK@fuNOG,0SAE7@hypNOG,12U9H@opiNOG,19PE7@sordNOG,COG5069@NOG,KOG0046@euNOG		GO:0000003-reproduction(L=1),GO:0000910-cytokinesis(L=4),GO:0000912-assembly of actomyosin apparatus involved in cytokinesis(L=5),GO:0000915-actomyosin contractile ring assembly(L=7),GO:0003006-developmental process involved in reproduction(L=2),GO:0006996-organelle organization(L=3),GO:0007010-cytoskeleton organization(L=4),GO:0007015-actin filament organization(L=5),GO:0007049-cell cycle(L=3),G…	GO:0001411-hyphal tip(L=4),GO:0005575-cellular_component(L=0),GO:0005622-intracellular(L=3),GO:0005623-cell(L=1),GO:0005737-cytoplasm(L=4),GO:0005826-actomyosin contractile ring(L=5),GO:0005856-cytoskeleton(L=5),GO:0005886-plasma membrane(L=3),GO:0005933-cellular bud(L=3),GO:0005934-cellular bud tip(L=3),GO:0005937-mating projection(L=4),GO:0005938-cell cortex(L=5),GO:0015629-actin cytoskeleton(L…	GO:0003674-molecular_function(L=0),GO:0003779-actin binding(L=4),GO:0003824-catalytic activity(L=1),GO:0005488-binding(L=1),GO:0005509-calcium ion binding(L=5),GO:0005515-protein binding(L=2),GO:0008092-cytoskeletal protein binding(L=3),GO:0016209-antioxidant activity(L=1),GO:0016491-oxidoreductase activity(L=2),GO:0030674-protein binding, bridging(L=3),GO:0043167-ion binding(L=2),GO:0043169-cati…			GO:0005515-protein binding(L=2),		IPR001715(Calponin homology domain)	Pfam	PF00307(Calponin homology (CH) domain)	2.9e-18
FC072V.10749.3	Complete	KAF5966189.1	100	130	0	0	1	130	97	226	6.7e-44	100	KAF5966189.1 mRNA splicing factor [Fusarium bulbicola]	fusarium bulbicola	fusarium bulbicola;fusarium fujikuroi species complex;fusarium;nectriaceae;hypocreales;hypocreomycetidae;sordariomycetes;sordariomyceta;leotiomyceta;pezizomycotina;saccharomyceta;ascomycota;dikarya;fungi;opisthokonta;eukaryota;cellular organisms;root	/LUSTRE/HOME/uva_dpvrf_1/uva_dpvrf_1_3/annotation/entap_outfiles/similarity_search/DIAMOND/blastp_transcripts_fc072v_final_nr.out	No	Yes							117187.FVEG_02576T0	7.7e-44	181.8	FG09864.1	Fungi	fuNOG[21]	03RQV@ascNOG,0IXV7@euNOG,0PQ6I@fuNOG,0SHPB@hypNOG,11J0A@NOG,13R8V@opiNOG,19RJU@sordNOG		GO:0000375-RNA splicing, via transesterification reactions(L=7),GO:0000377-RNA splicing, via transesterification reactions with bulged adenosine as nucleophile(L=8),GO:0000398-mRNA splicing, via spliceosome(L=7),GO:0006139-nucleobase-containing compound metabolic process(L=3),GO:0006396-RNA processing(L=5),GO:0006397-mRNA processing(L=7),GO:0006725-cellular aromatic compound metabolic process(L=3…	GO:0005575-cellular_component(L=0),GO:0005622-intracellular(L=3),GO:0005623-cell(L=1),GO:0005634-nucleus(L=5),GO:0043226-organelle(L=1),GO:0043227-membrane-bounded organelle(L=2),GO:0043229-intracellular organelle(L=3),GO:0043231-intracellular membrane-bounded organelle(L=4),GO:0044424-intracellular part(L=3),GO:0044464-cell part(L=2),	GO:0000166-nucleotide binding(L=3),GO:0003674-molecular_function(L=0),GO:0003676-nucleic acid binding(L=3),GO:0003723-RNA binding(L=4),GO:0005488-binding(L=1),GO:0036094-small molecule binding(L=2),GO:0097159-organic cyclic compound binding(L=2),GO:1901265-nucleoside phosphate binding(L=3),GO:1901363-heterocyclic compound binding(L=2),
FC072V.10749.2	Complete	SCN84942.1	94.4	195	11	0	1	195	1	195	3.5e-81	100	SCN84942.1 related to mRNA splicing factor [Fusarium fujikuroi]	fusarium fujikuroi	fusarium fujikuroi;fusarium fujikuroi species complex;fusarium;nectriaceae;hypocreales;hypocreomycetidae;sordariomycetes;sordariomyceta;leotiomyceta;pezizomycotina;saccharomyceta;ascomycota;dikarya;fungi;opisthokonta;eukaryota;cellular organisms;root	/LUSTRE/HOME/uva_dpvrf_1/uva_dpvrf_1_3/annotation/entap_outfiles/similarity_search/DIAMOND/blastp_transcripts_fc072v_final_nr.out	No	Yes							117187.FVEG_02576T0	3.3e-83	313.2	FG09864.1	Fungi	fuNOG[21]	03RQV@ascNOG,0IXV7@euNOG,0PQ6I@fuNOG,0SHPB@hypNOG,11J0A@NOG,13R8V@opiNOG,19RJU@sordNOG		GO:0000375-RNA splicing, via transesterification reactions(L=7),GO:0000377-RNA splicing, via transesterification reactions with bulged adenosine as nucleophile(L=8),GO:0000398-mRNA splicing, via spliceosome(L=7),GO:0006139-nucleobase-containing compound metabolic process(L=3),GO:0006396-RNA processing(L=5),GO:0006397-mRNA processing(L=7),GO:0006725-cellular aromatic compound metabolic process(L=3…	GO:0005575-cellular_component(L=0),GO:0005622-intracellular(L=3),GO:0005623-cell(L=1),GO:0005634-nucleus(L=5),GO:0043226-organelle(L=1),GO:0043227-membrane-bounded organelle(L=2),GO:0043229-intracellular organelle(L=3),GO:0043231-intracellular membrane-bounded organelle(L=4),GO:0044424-intracellular part(L=3),GO:0044464-cell part(L=2),	GO:0000166-nucleotide binding(L=3),GO:0003674-molecular_function(L=0),GO:0003676-nucleic acid binding(L=3),GO:0003723-RNA binding(L=4),GO:0005488-binding(L=1),GO:0036094-small molecule binding(L=2),GO:0097159-organic cyclic compound binding(L=2),GO:1901265-nucleoside phosphate binding(L=3),GO:1901363-heterocyclic compound binding(L=2),			GO:0003676-nucleic acid binding(L=3),		IPR000504(RNA recognition motif domain)	Pfam	PF00076(RNA recognition motif. (a.k.a. RRM, RBD, or RNP domain))	8.2e-12
FC072V.10750.1	Complete	KAF5596906.1	99.7	299	1	0	37	335	272	570	1.6e-153	89.3	KAF5596906.1 hypothetical protein FSUBG_8669 [Fusarium subglutinans]	fusarium subglutinans	fusarium subglutinans;fusarium fujikuroi species complex;fusarium;nectriaceae;hypocreales;hypocreomycetidae;sordariomycetes;sordariomyceta;leotiomyceta;pezizomycotina;saccharomyceta;ascomycota;dikarya;fungi;opisthokonta;eukaryota;cellular organisms;root	/LUSTRE/HOME/uva_dpvrf_1/uva_dpvrf_1_3/annotation/entap_outfiles/similarity_search/DIAMOND/blastp_transcripts_fc072v_final_nr.out	No	No							117187.FVEG_02580T0	9.2e-134	481.9	FG09868.1	Fungi	fuNOG[21]	03RWS@ascNOG,0IXAC@euNOG,0PNRE@fuNOG,0SC02@hypNOG,0WYUM@necNOG,127CR@NOG,13RVT@opiNOG,19REX@sordNOG		GO:0001510-RNA methylation(L=4),GO:0006139-nucleobase-containing compound metabolic process(L=3),GO:0006725-cellular aromatic compound metabolic process(L=3),GO:0006807-nitrogen compound metabolic process(L=2),GO:0008150-biological_process(L=0),GO:0008152-metabolic process(L=1),GO:0009451-RNA modification(L=5),GO:0009987-cellular process(L=1),GO:0016070-RNA metabolic process(L=4),GO:0032259-methy…		GO:0003674-molecular_function(L=0),GO:0003676-nucleic acid binding(L=3),GO:0003677-DNA binding(L=4),GO:0003824-catalytic activity(L=1),GO:0005488-binding(L=1),GO:0008168-methyltransferase activity(L=4),GO:0016740-transferase activity(L=2),GO:0016741-transferase activity, transferring one-carbon groups(L=3),GO:0097159-organic cyclic compound binding(L=2),GO:1901363-heterocyclic compound binding(L=…
FC072V.10747.1	Complete	KAF5690002.1	100	329	0	0	1	329	1	329	2.3e-181	100	KAF5690002.1 OST3-oligosaccharyltransferase gamma subunit [Fusarium circinatum]	fusarium circinatum	fusarium circinatum;fusarium fujikuroi species complex;fusarium;nectriaceae;hypocreales;hypocreomycetidae;sordariomycetes;sordariomyceta;leotiomyceta;pezizomycotina;saccharomyceta;ascomycota;dikarya;fungi;opisthokonta;eukaryota;cellular organisms;root	/LUSTRE/HOME/uva_dpvrf_1/uva_dpvrf_1_3/annotation/entap_outfiles/similarity_search/DIAMOND/blastp_transcripts_fc072v_final_nr.out	No	Yes							117187.FVEG_02581T0	7.6e-181	638.3	OST3	Fungi	fuNOG[21]	03MBY@ascNOG,0PHIV@fuNOG,0SCDI@hypNOG,0WYFK@necNOG,0XR1F@NOG,12PVH@opiNOG,19IN3@sordNOG,KOG2603@euNOG	51051311004141	GO:0005975-carbohydrate metabolic process(L=3),GO:0006461-protein complex assembly(L=5),GO:0006464-cellular protein modification process(L=5),GO:0006486-protein glycosylation(L=6),GO:0006487-protein N-linked glycosylation(L=7),GO:0006493-protein O-linked glycosylation(L=7),GO:0008150-biological_process(L=0),GO:0008152-metabolic process(L=1),GO:0009058-biosynthetic process(L=2),GO:0009059-macromol…	GO:0005575-cellular_component(L=0),GO:0005622-intracellular(L=3),GO:0005623-cell(L=1),GO:0005737-cytoplasm(L=4),GO:0005783-endoplasmic reticulum(L=4),GO:0005789-endoplasmic reticulum membrane(L=3),GO:0008250-oligosaccharyltransferase complex(L=3),GO:0012505-endomembrane system(L=3),GO:0016020-membrane(L=1),GO:0016021-integral component of membrane(L=4),GO:0031090-organelle membrane(L=3),GO:003122…	GO:0003674-molecular_function(L=0),GO:0003824-catalytic activity(L=1),GO:0004576-oligosaccharyl transferase activity(L=5),GO:0004579-dolichyl-diphosphooligosaccharide-protein glycotransferase activity(L=6),GO:0016740-transferase activity(L=2),GO:0016757-transferase activity, transferring glycosyl groups(L=3),GO:0016758-transferase activity, transferring hexosyl groups(L=4),					IPR021149(Oligosaccharyl transferase complex, subunit OST3/OST6)	Pfam	PF04756(OST3 / OST6 family, transporter family)	5.2e-104
FC072V.10746.1	Complete	KIL96127.1	99.1	316	3	0	1	316	1	316	3e-162	100	KIL96127.1 guanine nucleotide-binding protein subunit beta-like protein [Fusarium avenaceum]	fusarium avenaceum	fusarium avenaceum;fusarium tricinctum species complex;fusarium;nectriaceae;hypocreales;hypocreomycetidae;sordariomycetes;sordariomyceta;leotiomyceta;pezizomycotina;saccharomyceta;ascomycota;dikarya;fungi;opisthokonta;eukaryota;cellular organisms;root	/LUSTRE/HOME/uva_dpvrf_1/uva_dpvrf_1_3/annotation/entap_outfiles/similarity_search/DIAMOND/blastp_transcripts_fc072v_final_nr.out	No	Yes							117187.FVEG_02582T0	5.6e-165	585.5	CPC2	Fungi	fuNOG[21]	03KZE@ascNOG,0PIEY@fuNOG,0SDCG@hypNOG,0WW8X@necNOG,0XQGZ@NOG,12RE4@opiNOG,19NS3@sordNOG,KOG0279@euNOG	5162	GO:0000003-reproduction(L=1),GO:0000909-sporocarp development involved in sexual reproduction(L=7),GO:0001403-invasive growth in response to glucose limitation(L=6),GO:0001678-cellular glucose homeostasis(L=5),GO:0003006-developmental process involved in reproduction(L=2),GO:0006417-regulation of translation(L=7),GO:0006950-response to stress(L=2),GO:0007154-cell communication(L=2),GO:0007165-sig…	GO:0005575-cellular_component(L=0),GO:0005622-intracellular(L=3),GO:0005623-cell(L=1),GO:0005737-cytoplasm(L=4),GO:0005829-cytosol(L=4),GO:0005840-ribosome(L=5),GO:0015935-small ribosomal subunit(L=6),GO:0016020-membrane(L=1),GO:0022626-cytosolic ribosome(L=5),GO:0022627-cytosolic small ribosomal subunit(L=6),GO:0030529-intracellular ribonucleoprotein complex(L=4),GO:0032991-macromolecular comple…	GO:0001965-G-protein alpha-subunit binding(L=3),GO:0003674-molecular_function(L=0),GO:0004871-signal transducer activity(L=1),GO:0005092-GDP-dissociation inhibitor activity(L=5),GO:0005488-binding(L=1),GO:0005515-protein binding(L=2),GO:0030234-enzyme regulator activity(L=2),GO:0030695-GTPase regulator activity(L=4),GO:0043021-ribonucleoprotein complex binding(L=3),GO:0043022-ribosome binding(L=4…			GO:0005515-protein binding(L=2),		IPR001680(WD40 repeat)	Pfam	PF00400(WD domain, G-beta repeat)	1.1e-08
FC072V.10744.1	Complete	KAF5699784.1	98	306	6	0	1	306	1	306	2.4e-161	100	KAF5699784.1 transcription initiation factor TFIID subunit 8 [Fusarium globosum]	fusarium globosum	fusarium globosum;fusarium fujikuroi species complex;fusarium;nectriaceae;hypocreales;hypocreomycetidae;sordariomycetes;sordariomyceta;leotiomyceta;pezizomycotina;saccharomyceta;ascomycota;dikarya;fungi;opisthokonta;eukaryota;cellular organisms;root	/LUSTRE/HOME/uva_dpvrf_1/uva_dpvrf_1_3/annotation/entap_outfiles/similarity_search/DIAMOND/blastp_transcripts_fc072v_final_nr.out	No	Yes							117187.FVEG_02583T0	2.3e-163	580.1	FG09871.1	Fungi	fuNOG[21]	03T9D@ascNOG,0IZ18@euNOG,0PQEV@fuNOG,0SDYK@hypNOG,0WUQM@necNOG,0XW9J@NOG,13TN0@opiNOG,19R9F@sordNOG		GO:0006139-nucleobase-containing compound metabolic process(L=3),GO:0006351-transcription, DNA-templated(L=5),GO:0006355-regulation of transcription, DNA-templated(L=7),GO:0006366-transcription from RNA polymerase II promoter(L=6),GO:0006725-cellular aromatic compound metabolic process(L=3),GO:0006807-nitrogen compound metabolic process(L=2),GO:0008150-biological_process(L=0),GO:0008152-metabolic…	GO:0000428-DNA-directed RNA polymerase complex(L=5),GO:0005575-cellular_component(L=0),GO:0005622-intracellular(L=3),GO:0005623-cell(L=1),GO:0005634-nucleus(L=5),GO:0005654-nucleoplasm(L=5),GO:0005667-transcription factor complex(L=4),GO:0005669-transcription factor TFIID complex(L=7),GO:0016591-DNA-directed RNA polymerase II, holoenzyme(L=7),GO:0030880-RNA polymerase complex(L=4),GO:0031974-memb…	GO:0000988-transcription factor activity, protein binding(L=1),GO:0000990-transcription factor activity, core RNA polymerase binding(L=2),GO:0000991-transcription factor activity, core RNA polymerase II binding(L=3),GO:0003674-molecular_function(L=0),				Reactome: R-HSA-6807505	IPR019473(Transcription factor TFIID, subunit 8, C-terminal)	Pfam	PF10406(Transcription factor TFIID complex subunit 8 C-term)	2.2e-18
FC072V.10743.1	Partial 5 Prime	CVK90086.1	99.5	212	1	0	1	212	25	236	6.3e-108	100	CVK90086.1 probable translation activator GCN1 [Fusarium mangiferae]	fusarium mangiferae	fusarium mangiferae;fusarium fujikuroi species complex;fusarium;nectriaceae;hypocreales;hypocreomycetidae;sordariomycetes;sordariomyceta;leotiomyceta;pezizomycotina;saccharomyceta;ascomycota;dikarya;fungi;opisthokonta;eukaryota;cellular organisms;root	/LUSTRE/HOME/uva_dpvrf_1/uva_dpvrf_1_3/annotation/entap_outfiles/similarity_search/DIAMOND/blastp_transcripts_fc072v_final_nr.out	No	Yes							229533.XP_390050.1	1e-98	364.8		Fungi	fuNOG[21]	04DP9@ascNOG,0QDSB@fuNOG,0SHDN@hypNOG,0WZ4C@necNOG,13DH2@opiNOG,1A50P@sordNOG,COG2147@NOG,KOG1242@euNOG,KOG1696@euNOG		GO:0006412-translation(L=5),GO:0008150-biological_process(L=0),GO:0008152-metabolic process(L=1),GO:0009058-biosynthetic process(L=2),GO:0009059-macromolecule biosynthetic process(L=4),GO:0009987-cellular process(L=1),GO:0010467-gene expression(L=4),GO:0019538-protein metabolic process(L=3),GO:0034645-cellular macromolecule biosynthetic process(L=4),GO:0043170-macromolecule metabolic process(L=3)…	GO:0005575-cellular_component(L=0),GO:0005622-intracellular(L=3),GO:0005623-cell(L=1),GO:0005737-cytoplasm(L=4),GO:0005840-ribosome(L=5),GO:0030529-intracellular ribonucleoprotein complex(L=4),GO:0032991-macromolecular complex(L=1),GO:0043226-organelle(L=1),GO:0043228-non-membrane-bounded organelle(L=2),GO:0043229-intracellular organelle(L=3),GO:0043232-intracellular non-membrane-bounded organell…	GO:0003674-molecular_function(L=0),GO:0003735-structural constituent of ribosome(L=2),GO:0005198-structural molecule activity(L=1),	GO:0006412-translation(L=5),	GO:0005840-ribosome(L=5),	GO:0003735-structural constituent of ribosome(L=2),	Reactome: R-HSA-156827|Reactome: R-HSA-156902|Reactome: R-HSA-1799339|Reactome: R-HSA-192823|Reactome: R-HSA-2408557|Reactome: R-HSA-6791226|Reactome: R-HSA-72689|Reactome: R-HSA-72706|Reactome: R-HSA-72764|Reactome: R-HSA-9010553|Reactome: R-HSA-9633012|Reactome: R-HSA-975956|Reactome: R-HSA-975957	IPR000196(Ribosomal protein L19/L19e)	Pfam	PF01280(Ribosomal protein L19e)	1.1e-59
FC072V.10739.2	Complete	KAF5661064.1	100	627	0	0	1	627	1	627	0	100	KAF5661064.1 sam-containing protein [Fusarium circinatum]	fusarium circinatum	fusarium circinatum;fusarium fujikuroi species complex;fusarium;nectriaceae;hypocreales;hypocreomycetidae;sordariomycetes;sordariomyceta;leotiomyceta;pezizomycotina;saccharomyceta;ascomycota;dikarya;fungi;opisthokonta;eukaryota;cellular organisms;root	/LUSTRE/HOME/uva_dpvrf_1/uva_dpvrf_1_3/annotation/entap_outfiles/similarity_search/DIAMOND/blastp_transcripts_fc072v_final_nr.out	No	Yes							117187.FVEG_07501T0	0	1168.7	FG02044.1	Fungi	fuNOG[21]	03QH5@ascNOG,0IK8J@euNOG,0PKEG@fuNOG,0SC87@hypNOG,0WSX3@necNOG,0XQNS@NOG,13IP4@opiNOG,19Q3K@sordNOG		GO:0008150-biological_process(L=0),GO:0008152-metabolic process(L=1),GO:0032259-methylation(L=2),		GO:0003674-molecular_function(L=0),GO:0003824-catalytic activity(L=1),GO:0008168-methyltransferase activity(L=4),GO:0016740-transferase activity(L=2),GO:0016741-transferase activity, transferring one-carbon groups(L=3),					IPR041698(Methyltransferase domain 25)	Pfam	PF13649(Methyltransferase domain)	5.2e-13
FC072V.10729.1	Partial 3 Prime	KAF5673565.1	97.6	339	8	0	1	339	1	339	3.4e-156	100	KAF5673565.1 macrophomate synthase [Fusarium circinatum]	fusarium circinatum	fusarium circinatum;fusarium fujikuroi species complex;fusarium;nectriaceae;hypocreales;hypocreomycetidae;sordariomycetes;sordariomyceta;leotiomyceta;pezizomycotina;saccharomyceta;ascomycota;dikarya;fungi;opisthokonta;eukaryota;cellular organisms;root	/LUSTRE/HOME/uva_dpvrf_1/uva_dpvrf_1_3/annotation/entap_outfiles/similarity_search/DIAMOND/blastp_transcripts_fc072v_final_nr.out	No	Yes							5085.CADAFUBP00009826	3.6e-69	267.3		Fungi	fuNOG[21]	0442S@ascNOG,0K099@euNOG,0MC9W@euroNOG,0MTSR@eurotNOG,0Q237@fuNOG,14H8Y@opiNOG,COG3836@NOG		GO:0006725-cellular aromatic compound metabolic process(L=3),GO:0008150-biological_process(L=0),GO:0008152-metabolic process(L=1),GO:0009987-cellular process(L=1),GO:0044237-cellular metabolic process(L=2),		GO:0003674-molecular_function(L=0),GO:0003824-catalytic activity(L=1),GO:0016829-lyase activity(L=2),GO:0016830-carbon-carbon lyase activity(L=3),			GO:0003824-catalytic activity(L=1),		IPR005000(HpcH/HpaI aldolase/citrate lyase domain)	Pfam	PF03328(HpcH/HpaI aldolase/citrate lyase family)	6.6e-24
FC072V.10727.1	Complete	KAF5603356.1	99.3	134	1	0	1	134	1	134	3.4e-43	100	KAF5603356.1 hypothetical protein FSUBG_7325 [Fusarium subglutinans]	fusarium subglutinans	fusarium subglutinans;fusarium fujikuroi species complex;fusarium;nectriaceae;hypocreales;hypocreomycetidae;sordariomycetes;sordariomyceta;leotiomyceta;pezizomycotina;saccharomyceta;ascomycota;dikarya;fungi;opisthokonta;eukaryota;cellular organisms;root	/LUSTRE/HOME/uva_dpvrf_1/uva_dpvrf_1_3/annotation/entap_outfiles/similarity_search/DIAMOND/blastp_transcripts_fc072v_final_nr.out	No	No							5507.FOXG_00017P0	2.3e-43	180.3		Fungi	fuNOG[21]	03UXI@ascNOG,0J38A@euNOG,0PS43@fuNOG,0SM3X@hypNOG,1261V@NOG,13WUG@opiNOG,19SXS@sordNOG									IPR022024(Protein of unknown function DUF3602)	Pfam	PF12223(Protein of unknown function (DUF3602))	9.3e-13
FC072V.10726.1	Complete	KAF5679940.1	100	366	0	0	1	366	1	366	8.9e-219	100	KAF5679940.1 uroporphyrinogen decarboxylase [Fusarium circinatum]	fusarium circinatum	fusarium circinatum;fusarium fujikuroi species complex;fusarium;nectriaceae;hypocreales;hypocreomycetidae;sordariomycetes;sordariomyceta;leotiomyceta;pezizomycotina;saccharomyceta;ascomycota;dikarya;fungi;opisthokonta;eukaryota;cellular organisms;root	/LUSTRE/HOME/uva_dpvrf_1/uva_dpvrf_1_3/annotation/entap_outfiles/similarity_search/DIAMOND/blastp_transcripts_fc072v_final_nr.out	No	Yes							117187.FVEG_01496T0	6.2e-216	755	HEM12	Fungi	fuNOG[21]	03JYQ@ascNOG,0PGWW@fuNOG,0SATU@hypNOG,0WUDD@necNOG,12PJG@opiNOG,19NWE@sordNOG,COG0407@NOG,KOG2872@euNOG	86011001110	GO:0006725-cellular aromatic compound metabolic process(L=3),GO:0006778-porphyrin-containing compound metabolic process(L=4),GO:0006779-porphyrin-containing compound biosynthetic process(L=5),GO:0006782-protoporphyrinogen IX biosynthetic process(L=7),GO:0006783-heme biosynthetic process(L=4),GO:0006807-nitrogen compound metabolic process(L=2),GO:0007275-multicellular organism development(L=3),GO:…	GO:0005575-cellular_component(L=0),GO:0005622-intracellular(L=3),GO:0005623-cell(L=1),GO:0005634-nucleus(L=5),GO:0005737-cytoplasm(L=4),GO:0005829-cytosol(L=4),GO:0043226-organelle(L=1),GO:0043227-membrane-bounded organelle(L=2),GO:0043229-intracellular organelle(L=3),GO:0043231-intracellular membrane-bounded organelle(L=4),GO:0044424-intracellular part(L=3),GO:0044444-cytoplasmic part(L=4),GO:00…	GO:0003674-molecular_function(L=0),GO:0003824-catalytic activity(L=1),GO:0004853-uroporphyrinogen decarboxylase activity(L=5),GO:0016829-lyase activity(L=2),GO:0016830-carbon-carbon lyase activity(L=3),GO:0016831-carboxy-lyase activity(L=4),	GO:0006779-porphyrin-containing compound biosynthetic process(L=5),		GO:0004853-uroporphyrinogen decarboxylase activity(L=5),	KEGG: 00860+4.1.1.37|MetaCyc: PWY-5531|MetaCyc: PWY-7159|MetaCyc: PWY-7766|Reactome: R-HSA-189451	IPR000257(Uroporphyrinogen decarboxylase (URO-D))	Pfam	PF01208(Uroporphyrinogen decarboxylase (URO-D))	3.7e-128
FC072V.10723.2	Partial 3 Prime	KAF5679936.1	100	748	0	0	1	748	29	776	0	100	KAF5679936.1 ATP-dependent RNA helicase [Fusarium circinatum]	fusarium circinatum	fusarium circinatum;fusarium fujikuroi species complex;fusarium;nectriaceae;hypocreales;hypocreomycetidae;sordariomycetes;sordariomyceta;leotiomyceta;pezizomycotina;saccharomyceta;ascomycota;dikarya;fungi;opisthokonta;eukaryota;cellular organisms;root	/LUSTRE/HOME/uva_dpvrf_1/uva_dpvrf_1_3/annotation/entap_outfiles/similarity_search/DIAMOND/blastp_transcripts_fc072v_final_nr.out	No	Yes							5507.FOXG_00023P0	0	1376.3	FG01357.1	Fungi	fuNOG[21]	03JVC@ascNOG,0PIUS@fuNOG,0SDKM@hypNOG,12XQQ@opiNOG,19PP2@sordNOG,COG1643@NOG,KOG0922@euNOG		GO:0000462-maturation of SSU-rRNA from tricistronic rRNA transcript (SSU-rRNA, 5.8S rRNA, LSU-rRNA)(L=9),GO:0006139-nucleobase-containing compound metabolic process(L=3),GO:0006152-purine nucleoside catabolic process(L=7),GO:0006163-purine nucleotide metabolic process(L=5),GO:0006195-purine nucleotide catabolic process(L=7),GO:0006200-obsolete ATP catabolic process(L=),GO:0006364-rRNA processing(…	GO:0005575-cellular_component(L=0),GO:0005622-intracellular(L=3),GO:0005623-cell(L=1),GO:0005634-nucleus(L=5),GO:0005730-nucleolus(L=5),GO:0031974-membrane-enclosed lumen(L=1),GO:0031981-nuclear lumen(L=6),GO:0043226-organelle(L=1),GO:0043227-membrane-bounded organelle(L=2),GO:0043228-non-membrane-bounded organelle(L=2),GO:0043229-intracellular organelle(L=3),GO:0043231-intracellular membrane-bou…	GO:0000166-nucleotide binding(L=3),GO:0001882-nucleoside binding(L=3),GO:0001883-purine nucleoside binding(L=4),GO:0003674-molecular_function(L=0),GO:0003676-nucleic acid binding(L=3),GO:0003723-RNA binding(L=4),GO:0003724-RNA helicase activity(L=8),GO:0003824-catalytic activity(L=1),GO:0004004-ATP-dependent RNA helicase activity(L=9),GO:0004386-helicase activity(L=7),GO:0005488-binding(L=1),GO:0…			GO:0004386-helicase activity(L=7),		IPR007502(Helicase-associated domain)	Pfam	PF04408(Helicase associated domain (HA2))	7.2e-17
FC072V.10722.1	Complete	KAF5679933.1	100	438	0	0	1	438	1	438	1.8e-237	100	KAF5679933.1 component of histone acetyltransferase complex [Fusarium circinatum]	fusarium circinatum	fusarium circinatum;fusarium fujikuroi species complex;fusarium;nectriaceae;hypocreales;hypocreomycetidae;sordariomycetes;sordariomyceta;leotiomyceta;pezizomycotina;saccharomyceta;ascomycota;dikarya;fungi;opisthokonta;eukaryota;cellular organisms;root	/LUSTRE/HOME/uva_dpvrf_1/uva_dpvrf_1_3/annotation/entap_outfiles/similarity_search/DIAMOND/blastp_transcripts_fc072v_final_nr.out	No	Yes							117187.FVEG_01490T0	8.4e-228	794.7	YNG2	Fungi	fuNOG[21]	03NC4@ascNOG,0PJCW@fuNOG,0SC7V@hypNOG,12PS3@opiNOG,19QXS@sordNOG,COG5034@NOG,KOG1973@euNOG		GO:0000003-reproduction(L=1),GO:0006139-nucleobase-containing compound metabolic process(L=3),GO:0006259-DNA metabolic process(L=4),GO:0006281-DNA repair(L=5),GO:0006282-regulation of DNA repair(L=7),GO:0006325-chromatin organization(L=4),GO:0006351-transcription, DNA-templated(L=5),GO:0006355-regulation of transcription, DNA-templated(L=7),GO:0006357-regulation of transcription from RNA polymera…	GO:0000123-histone acetyltransferase complex(L=7),GO:0005575-cellular_component(L=0),GO:0005622-intracellular(L=3),GO:0005623-cell(L=1),GO:0005634-nucleus(L=5),GO:0005654-nucleoplasm(L=5),GO:0005737-cytoplasm(L=4),GO:0005829-cytosol(L=4),GO:0031974-membrane-enclosed lumen(L=1),GO:0031981-nuclear lumen(L=6),GO:0032777-Piccolo NuA4 histone acetyltransferase complex(L=11),GO:0032991-macromolecular c…	GO:0003674-molecular_function(L=0),GO:0003824-catalytic activity(L=1),GO:0004402-histone acetyltransferase activity(L=9),GO:0005488-binding(L=1),GO:0005515-protein binding(L=2),GO:0008080-N-acetyltransferase activity(L=6),GO:0008270-zinc ion binding(L=6),GO:0016407-acetyltransferase activity(L=5),GO:0016410-N-acyltransferase activity(L=5),GO:0016740-transferase activity(L=2),GO:0016746-transferas…					IPR024610(Inhibitor of growth protein, N-terminal histone-binding)	Pfam	PF12998(Inhibitor of growth proteins N-terminal histone-binding)	2.3e-24
FC072V.10718.1	Complete	KAF5679931.1	100	319	0	0	1	319	1	319	6e-187	100	KAF5679931.1 endo alpha-1,4 polygalactosaminidase precursor [Fusarium circinatum]	fusarium circinatum	fusarium circinatum;fusarium fujikuroi species complex;fusarium;nectriaceae;hypocreales;hypocreomycetidae;sordariomycetes;sordariomyceta;leotiomyceta;pezizomycotina;saccharomyceta;ascomycota;dikarya;fungi;opisthokonta;eukaryota;cellular organisms;root	/LUSTRE/HOME/uva_dpvrf_1/uva_dpvrf_1_3/annotation/entap_outfiles/similarity_search/DIAMOND/blastp_transcripts_fc072v_final_nr.out	No	Yes							5507.FOXG_00028P0	2e-178	630.2		Fungi	fuNOG[21]	03TGS@ascNOG,0IZ2E@euNOG,0PQFD@fuNOG,0SK1H@hypNOG,13TG1@opiNOG,19S4Y@sordNOG,COG3868@NOG		GO:0008150-biological_process(L=0),GO:0008152-metabolic process(L=1),		GO:0003674-molecular_function(L=0),GO:0003824-catalytic activity(L=1),GO:0016787-hydrolase activity(L=2),					IPR004352(Glycoside-hydrolase family GH114, TIM-barrel domain)	Pfam	PF03537(Glycoside-hydrolase family GH114)	9.3e-60
FC072V.10712.1	Complete	KAF5657611.1	100	612	0	0	1	612	1	612	1.7e-302	100	KAF5657611.1 transcriptional regulator CRZ1 [Fusarium circinatum]	fusarium circinatum	fusarium circinatum;fusarium fujikuroi species complex;fusarium;nectriaceae;hypocreales;hypocreomycetidae;sordariomycetes;sordariomyceta;leotiomyceta;pezizomycotina;saccharomyceta;ascomycota;dikarya;fungi;opisthokonta;eukaryota;cellular organisms;root	/LUSTRE/HOME/uva_dpvrf_1/uva_dpvrf_1_3/annotation/entap_outfiles/similarity_search/DIAMOND/blastp_transcripts_fc072v_final_nr.out	No	Yes							117187.FVEG_01485T0	1.8e-289	1000	FG01350.1	Fungi	fuNOG[21]	03P45@ascNOG,0PIHY@fuNOG,0SAH7@hypNOG,0WSVV@necNOG,13K5W@opiNOG,19NK3@sordNOG,COG5048@NOG,KOG1721@euNOG				GO:0003674-molecular_function(L=0),GO:0003676-nucleic acid binding(L=3),GO:0005488-binding(L=1),GO:0008270-zinc ion binding(L=6),GO:0043167-ion binding(L=2),GO:0043169-cation binding(L=3),GO:0046872-metal ion binding(L=4),GO:0046914-transition metal ion binding(L=5),GO:0097159-organic cyclic compound binding(L=2),GO:1901363-heterocyclic compound binding(L=2),					IPR013087(Zinc finger C2H2-type)	Pfam	PF00096(Zinc finger, C2H2 type)	0.0021
FC072V.10713.1	Complete	KAF5657612.1	100	511	0	0	1	511	1	511	3.7e-295	100	KAF5657612.1 Diacylglycerol O-acyltransferase 2A [Fusarium circinatum]	fusarium circinatum	fusarium circinatum;fusarium fujikuroi species complex;fusarium;nectriaceae;hypocreales;hypocreomycetidae;sordariomycetes;sordariomyceta;leotiomyceta;pezizomycotina;saccharomyceta;ascomycota;dikarya;fungi;opisthokonta;eukaryota;cellular organisms;root	/LUSTRE/HOME/uva_dpvrf_1/uva_dpvrf_1_3/annotation/entap_outfiles/similarity_search/DIAMOND/blastp_transcripts_fc072v_final_nr.out	No	Yes							117187.FVEG_01484T0	1.3e-280	970.3	DGA1	Fungi	fuNOG[21]	03J18@ascNOG,0PF9N@fuNOG,0SH37@hypNOG,0WTJY@necNOG,0XTG3@NOG,12TQI@opiNOG,19KDC@sordNOG,KOG0831@euNOG	4975	GO:0005975-carbohydrate metabolic process(L=3),GO:0006066-alcohol metabolic process(L=4),GO:0006071-glycerol metabolic process(L=4),GO:0006629-lipid metabolic process(L=3),GO:0006638-neutral lipid metabolic process(L=4),GO:0006639-acylglycerol metabolic process(L=5),GO:0006641-triglyceride metabolic process(L=7),GO:0006643-membrane lipid metabolic process(L=4),GO:0006665-sphingolipid metabolic pr…	GO:0005575-cellular_component(L=0),GO:0005622-intracellular(L=3),GO:0005623-cell(L=1),GO:0005737-cytoplasm(L=4),GO:0005783-endoplasmic reticulum(L=4),GO:0005789-endoplasmic reticulum membrane(L=3),GO:0005811-lipid particle(L=5),GO:0012505-endomembrane system(L=3),GO:0016020-membrane(L=1),GO:0016021-integral component of membrane(L=4),GO:0031090-organelle membrane(L=3),GO:0031224-intrinsic compone…	GO:0003674-molecular_function(L=0),GO:0003824-catalytic activity(L=1),GO:0003841-1-acylglycerol-3-phosphate O-acyltransferase activity(L=7),GO:0003846-2-acylglycerol O-acyltransferase activity(L=7),GO:0004144-diacylglycerol O-acyltransferase activity(L=7),GO:0008374-O-acyltransferase activity(L=5),GO:0016411-acylglycerol O-acyltransferase activity(L=6),GO:0016740-transferase activity(L=2),GO:0016…			GO:0016747-transferase activity, transferring acyl groups other than amino-acyl groups(L=4),		IPR007130(Diacylglycerol acyltransferase)	Pfam	PF03982(Diacylglycerol acyltransferase)	4e-96
FC072V.10715.2	Partial 3 Prime	OTA02065.1	75.6	393	89	4	1	387	1	392	5.6e-163	100	OTA02065.1 hypothetical protein A9Z42_0023980 [Trichoderma parareesei]	trichoderma parareesei	trichoderma parareesei;trichoderma;hypocreaceae;hypocreales;hypocreomycetidae;sordariomycetes;sordariomyceta;leotiomyceta;pezizomycotina;saccharomyceta;ascomycota;dikarya;fungi;opisthokonta;eukaryota;cellular organisms;root	/LUSTRE/HOME/uva_dpvrf_1/uva_dpvrf_1_3/annotation/entap_outfiles/similarity_search/DIAMOND/blastp_transcripts_fc072v_final_nr.out	No	No							117187.FVEG_01482T0	3e-213	746.1	FG01347.1	Fungi	fuNOG[21]	03IDZ@ascNOG,0PFEY@fuNOG,0SGGQ@hypNOG,0WW6S@necNOG,0XQ67@NOG,12N6H@opiNOG,19MA2@sordNOG,KOG1166@euNOG	4.11041e+23	GO:0000003-reproduction(L=1),GO:0000070-mitotic sister chromatid segregation(L=5),GO:0000075-cell cycle checkpoint(L=5),GO:0000226-microtubule cytoskeleton organization(L=4),GO:0000278-mitotic cell cycle(L=4),GO:0000280-nuclear division(L=5),GO:0000819-sister chromatid segregation(L=6),GO:0006325-chromatin organization(L=4),GO:0006464-cellular protein modification process(L=5),GO:0006468-protein …	GO:0000228-nuclear chromosome(L=5),GO:0000775-chromosome, centromeric region(L=6),GO:0000776-kinetochore(L=6),GO:0000777-condensed chromosome kinetochore(L=6),GO:0000778-condensed nuclear chromosome kinetochore(L=6),GO:0000779-condensed chromosome, centromeric region(L=6),GO:0000780-condensed nuclear chromosome, centromeric region(L=6),GO:0000793-condensed chromosome(L=5),GO:0000794-condensed nuc…	GO:0000166-nucleotide binding(L=3),GO:0001882-nucleoside binding(L=3),GO:0001883-purine nucleoside binding(L=4),GO:0003674-molecular_function(L=0),GO:0003824-catalytic activity(L=1),GO:0004672-protein kinase activity(L=5),GO:0004674-protein serine/threonine kinase activity(L=6),GO:0005488-binding(L=1),GO:0005515-protein binding(L=2),GO:0005524-ATP binding(L=7),GO:0016301-kinase activity(L=4),GO:0…				Reactome: R-HSA-141444|Reactome: R-HSA-2467813|Reactome: R-HSA-2500257|Reactome: R-HSA-5663220|Reactome: R-HSA-68877|Reactome: R-HSA-9648025	IPR013212(Mad3/Bub1 homology region 1)	Pfam	PF08311(Mad3/BUB1 homology region 1)	5.7e-44
FC072V.10715.1	Complete	KAF6788695.1	78.8	335	63	2	1	327	1	335	1.1e-143	100	KAF6788695.1 checkpoint protein kinase [Colletotrichum truncatum]	colletotrichum truncatum	colletotrichum truncatum;colletotrichum;glomerellaceae;glomerellales;hypocreomycetidae;sordariomycetes;sordariomyceta;leotiomyceta;pezizomycotina;saccharomyceta;ascomycota;dikarya;fungi;opisthokonta;eukaryota;cellular organisms;root	/LUSTRE/HOME/uva_dpvrf_1/uva_dpvrf_1_3/annotation/entap_outfiles/similarity_search/DIAMOND/blastp_transcripts_fc072v_final_nr.out	No	Yes							117187.FVEG_01482T0	1.7e-177	627.1	FG01347.1	Fungi	fuNOG[21]	03IDZ@ascNOG,0PFEY@fuNOG,0SGGQ@hypNOG,0WW6S@necNOG,0XQ67@NOG,12N6H@opiNOG,19MA2@sordNOG,KOG1166@euNOG	4.11041e+23	GO:0000003-reproduction(L=1),GO:0000070-mitotic sister chromatid segregation(L=5),GO:0000075-cell cycle checkpoint(L=5),GO:0000226-microtubule cytoskeleton organization(L=4),GO:0000278-mitotic cell cycle(L=4),GO:0000280-nuclear division(L=5),GO:0000819-sister chromatid segregation(L=6),GO:0006325-chromatin organization(L=4),GO:0006464-cellular protein modification process(L=5),GO:0006468-protein …	GO:0000228-nuclear chromosome(L=5),GO:0000775-chromosome, centromeric region(L=6),GO:0000776-kinetochore(L=6),GO:0000777-condensed chromosome kinetochore(L=6),GO:0000778-condensed nuclear chromosome kinetochore(L=6),GO:0000779-condensed chromosome, centromeric region(L=6),GO:0000780-condensed nuclear chromosome, centromeric region(L=6),GO:0000793-condensed chromosome(L=5),GO:0000794-condensed nuc…	GO:0000166-nucleotide binding(L=3),GO:0001882-nucleoside binding(L=3),GO:0001883-purine nucleoside binding(L=4),GO:0003674-molecular_function(L=0),GO:0003824-catalytic activity(L=1),GO:0004672-protein kinase activity(L=5),GO:0004674-protein serine/threonine kinase activity(L=6),GO:0005488-binding(L=1),GO:0005515-protein binding(L=2),GO:0005524-ATP binding(L=7),GO:0016301-kinase activity(L=4),GO:0…				Reactome: R-HSA-141444|Reactome: R-HSA-2467813|Reactome: R-HSA-2500257|Reactome: R-HSA-5663220|Reactome: R-HSA-68877|Reactome: R-HSA-9648025	IPR013212(Mad3/Bub1 homology region 1)	Pfam	PF08311(Mad3/BUB1 homology region 1)	4e-44
FC072V.10710.1	Complete	KAF5603338.1	99.6	257	1	0	1	257	1	257	1.1e-138	100	KAF5603338.1 pre-rrna-processing pno1 [Fusarium subglutinans]	fusarium subglutinans	fusarium subglutinans;fusarium fujikuroi species complex;fusarium;nectriaceae;hypocreales;hypocreomycetidae;sordariomycetes;sordariomyceta;leotiomyceta;pezizomycotina;saccharomyceta;ascomycota;dikarya;fungi;opisthokonta;eukaryota;cellular organisms;root	/LUSTRE/HOME/uva_dpvrf_1/uva_dpvrf_1_3/annotation/entap_outfiles/similarity_search/DIAMOND/blastp_transcripts_fc072v_final_nr.out	No	Yes							5507.FOXG_00036P0	8.1e-138	495	PNO1	Fungi	fuNOG[21]	03J7M@ascNOG,0PG9H@fuNOG,0S9X6@hypNOG,12NS1@opiNOG,19KMG@sordNOG,COG1094@NOG,KOG3273@euNOG		GO:0000447-endonucleolytic cleavage in ITS1 to separate SSU-rRNA from 5.8S rRNA and LSU-rRNA from tricistronic rRNA transcript (SSU-rRNA, 5.8S rRNA, LSU-rRNA)(L=10),GO:0000460-maturation of 5.8S rRNA(L=8),GO:0000462-maturation of SSU-rRNA from tricistronic rRNA transcript (SSU-rRNA, 5.8S rRNA, LSU-rRNA)(L=9),GO:0000466-maturation of 5.8S rRNA from tricistronic rRNA transcript (SSU-rRNA, 5.8S rRNA…	GO:0000502-proteasome complex(L=4),GO:0005575-cellular_component(L=0),GO:0005622-intracellular(L=3),GO:0005623-cell(L=1),GO:0005634-nucleus(L=5),GO:0005730-nucleolus(L=5),GO:0005737-cytoplasm(L=4),GO:0005829-cytosol(L=4),GO:0030529-intracellular ribonucleoprotein complex(L=4),GO:0030684-preribosome(L=5),GO:0030686-90S preribosome(L=6),GO:0031974-membrane-enclosed lumen(L=1),GO:0031981-nuclear lum…	GO:0003674-molecular_function(L=0),GO:0003676-nucleic acid binding(L=3),GO:0003723-RNA binding(L=4),GO:0005488-binding(L=1),GO:0005515-protein binding(L=2),GO:0051082-unfolded protein binding(L=3),GO:0097159-organic cyclic compound binding(L=2),GO:1901363-heterocyclic compound binding(L=2),
FC072V.10706.1	Complete	KAF5983991.1	99.7	353	1	0	1	353	1	353	1.4e-205	100	KAF5983991.1 alternative oxidase, mitochondrial [Fusarium bulbicola]	fusarium bulbicola	fusarium bulbicola;fusarium fujikuroi species complex;fusarium;nectriaceae;hypocreales;hypocreomycetidae;sordariomycetes;sordariomyceta;leotiomyceta;pezizomycotina;saccharomyceta;ascomycota;dikarya;fungi;opisthokonta;eukaryota;cellular organisms;root	/LUSTRE/HOME/uva_dpvrf_1/uva_dpvrf_1_3/annotation/entap_outfiles/similarity_search/DIAMOND/blastp_transcripts_fc072v_final_nr.out	No	Yes							5507.FOXG_00039P0	8.9e-204	714.5	AOX	Fungi	fuNOG[21]	03M2G@ascNOG,0IIJ8@euNOG,0PHGU@fuNOG,0SCBA@hypNOG,0YFEH@NOG,136AD@opiNOG,19IIC@sordNOG		GO:0006091-generation of precursor metabolites and energy(L=3),GO:0007275-multicellular organism development(L=3),GO:0007585-respiratory gaseous exchange(L=3),GO:0008150-biological_process(L=0),GO:0008152-metabolic process(L=1),GO:0009987-cellular process(L=1),GO:0022900-electron transport chain(L=3),GO:0032501-multicellular organismal process(L=1),GO:0032502-developmental process(L=1),GO:0043581…	GO:0005575-cellular_component(L=0),GO:0005622-intracellular(L=3),GO:0005623-cell(L=1),GO:0005737-cytoplasm(L=4),GO:0005739-mitochondrion(L=5),GO:0005740-mitochondrial envelope(L=6),GO:0005743-mitochondrial inner membrane(L=5),GO:0016020-membrane(L=1),GO:0016021-integral component of membrane(L=4),GO:0019866-organelle inner membrane(L=4),GO:0031090-organelle membrane(L=3),GO:0031224-intrinsic comp…	GO:0003674-molecular_function(L=0),GO:0003824-catalytic activity(L=1),GO:0005488-binding(L=1),GO:0009916-alternative oxidase activity(L=5),GO:0016491-oxidoreductase activity(L=2),GO:0016679-oxidoreductase activity, acting on diphenols and related substances as donors(L=3),GO:0016682-oxidoreductase activity, acting on diphenols and related substances as donors, oxygen as acceptor(L=4),GO:0043167-i…	GO:0055114-oxidation-reduction process(L=3),		GO:0009916-alternative oxidase activity(L=5),		IPR002680(Alternative oxidase)	Pfam	PF01786(Alternative oxidase)	2e-93
FC072V.10700.1	Partial 3 Prime	KAF5704637.1	94.8	116	6	0	16	131	107	222	9.4e-54	88.5	KAF5704637.1 Gcs1p-like zinc finger transcription factor, partial [Fusarium globosum]	fusarium globosum	fusarium globosum;fusarium fujikuroi species complex;fusarium;nectriaceae;hypocreales;hypocreomycetidae;sordariomycetes;sordariomyceta;leotiomyceta;pezizomycotina;saccharomyceta;ascomycota;dikarya;fungi;opisthokonta;eukaryota;cellular organisms;root	/LUSTRE/HOME/uva_dpvrf_1/uva_dpvrf_1_3/annotation/entap_outfiles/similarity_search/DIAMOND/blastp_transcripts_fc072v_final_nr.out	No	Yes							5507.FOXG_06196P0	3.6e-57	226.1	PGUG_02141	Fungi	fuNOG[21]	03PZ1@ascNOG,0PHZ5@fuNOG,0SBBR@hypNOG,13KQR@opiNOG,19PAV@sordNOG,COG5347@NOG,KOG0703@euNOG	4144	GO:0006140-regulation of nucleotide metabolic process(L=6),GO:0006355-regulation of transcription, DNA-templated(L=7),GO:0006810-transport(L=3),GO:0006888-ER to Golgi vesicle-mediated transport(L=4),GO:0006891-intra-Golgi vesicle-mediated transport(L=6),GO:0008150-biological_process(L=0),GO:0009118-regulation of nucleoside metabolic process(L=6),GO:0009889-regulation of biosynthetic process(L=4),…	GO:0005575-cellular_component(L=0),GO:0005622-intracellular(L=3),GO:0005623-cell(L=1),GO:0005737-cytoplasm(L=4),GO:0005794-Golgi apparatus(L=4),GO:0030135-coated vesicle(L=6),GO:0030136-clathrin-coated vesicle(L=7),GO:0031410-cytoplasmic vesicle(L=4),GO:0031982-vesicle(L=3),GO:0043226-organelle(L=1),GO:0043227-membrane-bounded organelle(L=2),GO:0043229-intracellular organelle(L=3),GO:0043231-intr…	GO:0001071-nucleic acid binding transcription factor activity(L=1),GO:0003674-molecular_function(L=0),GO:0003676-nucleic acid binding(L=3),GO:0003677-DNA binding(L=4),GO:0003700-transcription factor activity, sequence-specific DNA binding(L=2),GO:0005096-GTPase activator activity(L=4),GO:0005488-binding(L=1),GO:0008047-enzyme activator activity(L=3),GO:0008270-zinc ion binding(L=6),GO:0030234-enz…
FC072V.10697.1	Complete	KAF5690314.1	100	485	0	0	1	485	1	485	2.8e-292	100	KAF5690314.1 Delta(14)-sterol reductase [Fusarium circinatum]	fusarium circinatum	fusarium circinatum;fusarium fujikuroi species complex;fusarium;nectriaceae;hypocreales;hypocreomycetidae;sordariomycetes;sordariomyceta;leotiomyceta;pezizomycotina;saccharomyceta;ascomycota;dikarya;fungi;opisthokonta;eukaryota;cellular organisms;root	/LUSTRE/HOME/uva_dpvrf_1/uva_dpvrf_1_3/annotation/entap_outfiles/similarity_search/DIAMOND/blastp_transcripts_fc072v_final_nr.out	No	Yes							5507.FOXG_02348P0	5.9e-291	1004.6	ERG24	Fungi	fuNOG[21]	03K3W@ascNOG,0PFWY@fuNOG,0SEPY@hypNOG,0XP67@NOG,12PRZ@opiNOG,19PHI@sordNOG,KOG1435@euNOG	10011001110	GO:0006066-alcohol metabolic process(L=4),GO:0006629-lipid metabolic process(L=3),GO:0006694-steroid biosynthetic process(L=5),GO:0006696-ergosterol biosynthetic process(L=5),GO:0008150-biological_process(L=0),GO:0008152-metabolic process(L=1),GO:0008202-steroid metabolic process(L=4),GO:0008204-ergosterol metabolic process(L=4),GO:0008610-lipid biosynthetic process(L=4),GO:0009058-biosynthetic p…	GO:0005575-cellular_component(L=0),GO:0005622-intracellular(L=3),GO:0005623-cell(L=1),GO:0005737-cytoplasm(L=4),GO:0005783-endoplasmic reticulum(L=4),GO:0005789-endoplasmic reticulum membrane(L=3),GO:0012505-endomembrane system(L=3),GO:0016020-membrane(L=1),GO:0016021-integral component of membrane(L=4),GO:0031090-organelle membrane(L=3),GO:0031224-intrinsic component of membrane(L=3),GO:0042175-…	GO:0003674-molecular_function(L=0),GO:0003824-catalytic activity(L=1),GO:0016491-oxidoreductase activity(L=2),GO:0016627-oxidoreductase activity, acting on the CH-CH group of donors(L=3),GO:0016628-oxidoreductase activity, acting on the CH-CH group of donors, NAD or NADP as acceptor(L=4),GO:0016829-lyase activity(L=2),GO:0016846-carbon-sulfur lyase activity(L=3),GO:0050613-delta14-sterol reductas…	GO:0016126-sterol biosynthetic process(L=5),	GO:0016020-membrane(L=1),	GO:0016628-oxidoreductase activity, acting on the CH-CH group of donors, NAD or NADP as acceptor(L=4),		IPR001171(Ergosterol biosynthesis ERG4/ERG24)	Pfam	PF01222(Ergosterol biosynthesis ERG4/ERG24 family)	1.8e-167
FC072V.10693.1
FC072V.10691.1
FC072V.10694.2	Complete	KAF5684664.1	99.7	654	2	0	1	654	1	654	0	100	KAF5684664.1 calcium channel YVC1 [Fusarium circinatum]	fusarium circinatum	fusarium circinatum;fusarium fujikuroi species complex;fusarium;nectriaceae;hypocreales;hypocreomycetidae;sordariomycetes;sordariomyceta;leotiomyceta;pezizomycotina;saccharomyceta;ascomycota;dikarya;fungi;opisthokonta;eukaryota;cellular organisms;root	/LUSTRE/HOME/uva_dpvrf_1/uva_dpvrf_1_3/annotation/entap_outfiles/similarity_search/DIAMOND/blastp_transcripts_fc072v_final_nr.out	No	Yes							5507.FOXG_13541P0	4.7e-267	925.6		Fungi	fuNOG[21]	03INH@ascNOG,0IFB0@euNOG,0PHVQ@fuNOG,0SBD4@hypNOG,0Y9DE@NOG,12PXG@opiNOG,19NBM@sordNOG
FC072V.10694.1	Complete	KAF5684664.1	100	371	0	0	1	371	284	654	2.5e-208	100	KAF5684664.1 calcium channel YVC1 [Fusarium circinatum]	fusarium circinatum	fusarium circinatum;fusarium fujikuroi species complex;fusarium;nectriaceae;hypocreales;hypocreomycetidae;sordariomycetes;sordariomyceta;leotiomyceta;pezizomycotina;saccharomyceta;ascomycota;dikarya;fungi;opisthokonta;eukaryota;cellular organisms;root	/LUSTRE/HOME/uva_dpvrf_1/uva_dpvrf_1_3/annotation/entap_outfiles/similarity_search/DIAMOND/blastp_transcripts_fc072v_final_nr.out	No	Yes							140110.NechaP72149	9.2e-143	511.9		Fungi	fuNOG[21]	03INH@ascNOG,0IFB0@euNOG,0PHVQ@fuNOG,0SBD4@hypNOG,0Y9DE@NOG,12PXG@opiNOG,19NBM@sordNOG
FC072V.10692.3
FC072V.10692.2	Complete	KAF5562187.1	95.3	170	8	0	1	170	1	170	7.6e-72	100	KAF5562187.1 glycine-rich RNA-binding protein [Fusarium phyllophilum]	fusarium phyllophilum	fusarium phyllophilum;fusarium fujikuroi species complex;fusarium;nectriaceae;hypocreales;hypocreomycetidae;sordariomycetes;sordariomyceta;leotiomyceta;pezizomycotina;saccharomyceta;ascomycota;dikarya;fungi;opisthokonta;eukaryota;cellular organisms;root	/LUSTRE/HOME/uva_dpvrf_1/uva_dpvrf_1_3/annotation/entap_outfiles/similarity_search/DIAMOND/blastp_transcripts_fc072v_final_nr.out	No	Yes							117187.FVEG_00902T0	6e-73	278.9		Fungi	fuNOG[21]	03TM0@ascNOG,0PQQ1@fuNOG,0SBRK@hypNOG,0X0QI@necNOG,13VXG@opiNOG,19SM3@sordNOG,COG0724@NOG,KOG0118@euNOG				GO:0000166-nucleotide binding(L=3),GO:0003674-molecular_function(L=0),GO:0003676-nucleic acid binding(L=3),GO:0005488-binding(L=1),GO:0036094-small molecule binding(L=2),GO:0097159-organic cyclic compound binding(L=2),GO:1901265-nucleoside phosphate binding(L=3),GO:1901363-heterocyclic compound binding(L=2),			GO:0003676-nucleic acid binding(L=3),		IPR000504(RNA recognition motif domain)	Pfam	PF00076(RNA recognition motif. (a.k.a. RRM, RBD, or RNP domain))	8.1e-23
FC072V.10692.1	Complete	KAF5562187.1	95.3	170	8	0	1	170	1	170	7.6e-72	100	KAF5562187.1 glycine-rich RNA-binding protein [Fusarium phyllophilum]	fusarium phyllophilum	fusarium phyllophilum;fusarium fujikuroi species complex;fusarium;nectriaceae;hypocreales;hypocreomycetidae;sordariomycetes;sordariomyceta;leotiomyceta;pezizomycotina;saccharomyceta;ascomycota;dikarya;fungi;opisthokonta;eukaryota;cellular organisms;root	/LUSTRE/HOME/uva_dpvrf_1/uva_dpvrf_1_3/annotation/entap_outfiles/similarity_search/DIAMOND/blastp_transcripts_fc072v_final_nr.out	No	Yes							117187.FVEG_00902T0	6e-73	278.9		Fungi	fuNOG[21]	03TM0@ascNOG,0PQQ1@fuNOG,0SBRK@hypNOG,0X0QI@necNOG,13VXG@opiNOG,19SM3@sordNOG,COG0724@NOG,KOG0118@euNOG				GO:0000166-nucleotide binding(L=3),GO:0003674-molecular_function(L=0),GO:0003676-nucleic acid binding(L=3),GO:0005488-binding(L=1),GO:0036094-small molecule binding(L=2),GO:0097159-organic cyclic compound binding(L=2),GO:1901265-nucleoside phosphate binding(L=3),GO:1901363-heterocyclic compound binding(L=2),			GO:0003676-nucleic acid binding(L=3),		IPR000504(RNA recognition motif domain)	Pfam	PF00076(RNA recognition motif. (a.k.a. RRM, RBD, or RNP domain))	8.1e-23
FC072V.10687.2
FC072V.10686.1	Complete	KAF5542308.1	98.2	285	0	1	1	280	1	285	2.2e-132	100	KAF5542308.1 programmed cell death (calcium-binding) [Fusarium mexicanum]	fusarium mexicanum	fusarium mexicanum;fusarium fujikuroi species complex;fusarium;nectriaceae;hypocreales;hypocreomycetidae;sordariomycetes;sordariomyceta;leotiomyceta;pezizomycotina;saccharomyceta;ascomycota;dikarya;fungi;opisthokonta;eukaryota;cellular organisms;root	/LUSTRE/HOME/uva_dpvrf_1/uva_dpvrf_1_3/annotation/entap_outfiles/similarity_search/DIAMOND/blastp_transcripts_fc072v_final_nr.out	No	Yes							117187.FVEG_00904T0	1.1e-132	478	PGUG_05263	Fungi	fuNOG[21]	03QRJ@ascNOG,0PI12@fuNOG,0SCCQ@hypNOG,0WXYQ@necNOG,0YKQK@NOG,13H67@opiNOG,19NT5@sordNOG,KOG0037@euNOG		GO:0000003-reproduction(L=1),GO:0000282-cellular bud site selection(L=5),GO:0000910-cytokinesis(L=4),GO:0003400-regulation of COPII vesicle coating(L=7),GO:0006139-nucleobase-containing compound metabolic process(L=3),GO:0006152-purine nucleoside catabolic process(L=7),GO:0006163-purine nucleotide metabolic process(L=5),GO:0006184-obsolete GTP catabolic process(L=),GO:0006195-purine nucleotide ca…	GO:0005575-cellular_component(L=0),GO:0005622-intracellular(L=3),GO:0005623-cell(L=1),GO:0005634-nucleus(L=5),GO:0005635-nuclear envelope(L=4),GO:0005737-cytoplasm(L=4),GO:0005783-endoplasmic reticulum(L=4),GO:0005789-endoplasmic reticulum membrane(L=3),GO:0005829-cytosol(L=4),GO:0005933-cellular bud(L=3),GO:0005934-cellular bud tip(L=3),GO:0005935-cellular bud neck(L=3),GO:0012505-endomembrane s…	GO:0003674-molecular_function(L=0),GO:0005488-binding(L=1),GO:0005509-calcium ion binding(L=5),GO:0008270-zinc ion binding(L=6),GO:0043167-ion binding(L=2),GO:0043169-cation binding(L=3),GO:0046872-metal ion binding(L=4),GO:0046914-transition metal ion binding(L=5),GO:0060090-binding, bridging(L=2),			GO:0005509-calcium ion binding(L=5),		IPR002048(EF-hand domain)	Pfam	PF13499(EF-hand domain pair)	6e-10
FC072V.10685.1
FC072V.10689.3	Partial 5 Prime	KAF5663147.1	100	265	0	0	1	265	84	348	1.3e-142	100	KAF5663147.1 hypothetical protein FCIRC_11243 [Fusarium circinatum]	fusarium circinatum	fusarium circinatum;fusarium fujikuroi species complex;fusarium;nectriaceae;hypocreales;hypocreomycetidae;sordariomycetes;sordariomyceta;leotiomyceta;pezizomycotina;saccharomyceta;ascomycota;dikarya;fungi;opisthokonta;eukaryota;cellular organisms;root	/LUSTRE/HOME/uva_dpvrf_1/uva_dpvrf_1_3/annotation/entap_outfiles/similarity_search/DIAMOND/blastp_transcripts_fc072v_final_nr.out	No	No							5507.FOXG_00606P0	1.3e-130	471.1	FG00446.1	Fungi	fuNOG[21]	03SX7@ascNOG,0IYG5@euNOG,0PQA6@fuNOG,0SDVI@hypNOG,129JN@NOG,13QB2@opiNOG,19R7R@sordNOG									IPR010756(Telomere length and silencing protein 1)	Pfam	PF07052(Hepatocellular carcinoma-associated antigen 59)	1.4e-07
FC072V.10681.1	Complete	KAF5542302.1	100	287	0	0	1	287	14	300	2.2e-132	100	KAF5542302.1 hypothetical protein FMEXI_7514 [Fusarium mexicanum]	fusarium mexicanum	fusarium mexicanum;fusarium fujikuroi species complex;fusarium;nectriaceae;hypocreales;hypocreomycetidae;sordariomycetes;sordariomyceta;leotiomyceta;pezizomycotina;saccharomyceta;ascomycota;dikarya;fungi;opisthokonta;eukaryota;cellular organisms;root	/LUSTRE/HOME/uva_dpvrf_1/uva_dpvrf_1_3/annotation/entap_outfiles/similarity_search/DIAMOND/blastp_transcripts_fc072v_final_nr.out	No	No							5507.FOXG_00603P0	2.4e-130	470.3	FG00450.1	Fungi	fuNOG[21]	03TS3@ascNOG,0J0YA@euNOG,0PR5J@fuNOG,0SKKV@hypNOG,127BE@NOG,13UP5@opiNOG,19STD@sordNOG
FC072V.10678.1	Complete	KAF5685279.1	100	417	0	0	1	417	1	417	9.2e-228	100	KAF5685279.1 maintenance-mitochondrial morphology 1 [Fusarium circinatum]	fusarium circinatum	fusarium circinatum;fusarium fujikuroi species complex;fusarium;nectriaceae;hypocreales;hypocreomycetidae;sordariomycetes;sordariomyceta;leotiomyceta;pezizomycotina;saccharomyceta;ascomycota;dikarya;fungi;opisthokonta;eukaryota;cellular organisms;root	/LUSTRE/HOME/uva_dpvrf_1/uva_dpvrf_1_3/annotation/entap_outfiles/similarity_search/DIAMOND/blastp_transcripts_fc072v_final_nr.out	No	Yes							117187.FVEG_09155T0	5e-222	775.4	MMM1	Fungi	fuNOG[21]	03IA6@ascNOG,0IDY7@euNOG,0PFB3@fuNOG,0SDE3@hypNOG,0WWCT@necNOG,0XSBK@NOG,12TC9@opiNOG,19IHG@sordNOG		GO:0000001-mitochondrion inheritance(L=5),GO:0000002-mitochondrial genome maintenance(L=5),GO:0000723-telomere maintenance(L=6),GO:0006139-nucleobase-containing compound metabolic process(L=3),GO:0006259-DNA metabolic process(L=4),GO:0006605-protein targeting(L=6),GO:0006626-protein targeting to mitochondrion(L=7),GO:0006725-cellular aromatic compound metabolic process(L=3),GO:0006807-nitrogen co…	GO:0005575-cellular_component(L=0),GO:0005622-intracellular(L=3),GO:0005623-cell(L=1),GO:0005737-cytoplasm(L=4),GO:0005739-mitochondrion(L=5),GO:0005740-mitochondrial envelope(L=6),GO:0005741-mitochondrial outer membrane(L=5),GO:0005783-endoplasmic reticulum(L=4),GO:0005789-endoplasmic reticulum membrane(L=3),GO:0012505-endomembrane system(L=3),GO:0016020-membrane(L=1),GO:0016021-integral compone…	GO:0003674-molecular_function(L=0),					IPR019411(MMM1 domain)	Pfam	PF10296(Maintenance of mitochondrial morphology protein 1)	2.7e-135
FC072V.10675.1	Internal	XP_035335085.1	73.7	255	62	2	1	252	36	288	5.2e-101	100	XP_035335085.1 glucose inhibited division protein A [Colletotrichum scovillei]	colletotrichum scovillei	colletotrichum scovillei;colletotrichum;glomerellaceae;glomerellales;hypocreomycetidae;sordariomycetes;sordariomyceta;leotiomyceta;pezizomycotina;saccharomyceta;ascomycota;dikarya;fungi;opisthokonta;eukaryota;cellular organisms;root	/LUSTRE/HOME/uva_dpvrf_1/uva_dpvrf_1_3/annotation/entap_outfiles/similarity_search/DIAMOND/blastp_transcripts_fc072v_final_nr.out	No	Yes							5518.FGSG_02594P0	1.6e-125	454.1	FG02594.1	Fungi	fuNOG[21]	049CI@ascNOG,0KMVE@euNOG,0Q8NB@fuNOG,0SMY7@hypNOG,0X1MR@necNOG,1363D@opiNOG,1A1PG@sordNOG,COG0445@NOG		GO:0002097-tRNA wobble base modification(L=9),GO:0002098-tRNA wobble uridine modification(L=10),GO:0006139-nucleobase-containing compound metabolic process(L=3),GO:0006396-RNA processing(L=5),GO:0006399-tRNA metabolic process(L=7),GO:0006400-tRNA modification(L=8),GO:0006725-cellular aromatic compound metabolic process(L=3),GO:0006807-nitrogen compound metabolic process(L=2),GO:0006810-transport(…		GO:0000166-nucleotide binding(L=3),GO:0003674-molecular_function(L=0),GO:0005488-binding(L=1),GO:0036094-small molecule binding(L=2),GO:0043167-ion binding(L=2),GO:0043168-anion binding(L=3),GO:0048037-cofactor binding(L=2),GO:0050660-flavin adenine dinucleotide binding(L=4),GO:0050662-coenzyme binding(L=3),GO:0097159-organic cyclic compound binding(L=2),GO:1901265-nucleoside phosphate binding(L=…				Reactome: R-HSA-6787450	IPR040131(MnmG, N-terminal domain)	Pfam	PF01134(Glucose inhibited division protein A)	2.2e-90
FC072V.10676.2	Partial 3 Prime	KAF5711243.1	97.1	379	11	0	1	379	1	379	7.4e-184	100	KAF5711243.1 Tyrosyl-DNA phosphodiesterase 1 [Fusarium globosum]	fusarium globosum	fusarium globosum;fusarium fujikuroi species complex;fusarium;nectriaceae;hypocreales;hypocreomycetidae;sordariomycetes;sordariomyceta;leotiomyceta;pezizomycotina;saccharomyceta;ascomycota;dikarya;fungi;opisthokonta;eukaryota;cellular organisms;root	/LUSTRE/HOME/uva_dpvrf_1/uva_dpvrf_1_3/annotation/entap_outfiles/similarity_search/DIAMOND/blastp_transcripts_fc072v_final_nr.out	No	Yes							5507.FOXG_10509P0	6.3e-155	552.4		Fungi	fuNOG[21]	03KS8@ascNOG,0IF2G@euNOG,0PFY1@fuNOG,0SCZZ@hypNOG,11C97@NOG,12QGF@opiNOG,19P6F@sordNOG		GO:0006139-nucleobase-containing compound metabolic process(L=3),GO:0006259-DNA metabolic process(L=4),GO:0006281-DNA repair(L=5),GO:0006725-cellular aromatic compound metabolic process(L=3),GO:0006807-nitrogen compound metabolic process(L=2),GO:0006950-response to stress(L=2),GO:0006974-cellular response to DNA damage stimulus(L=4),GO:0008150-biological_process(L=0),GO:0008152-metabolic process(…	GO:0005575-cellular_component(L=0),GO:0005622-intracellular(L=3),GO:0005623-cell(L=1),GO:0005634-nucleus(L=5),GO:0043226-organelle(L=1),GO:0043227-membrane-bounded organelle(L=2),GO:0043229-intracellular organelle(L=3),GO:0043231-intracellular membrane-bounded organelle(L=4),GO:0044424-intracellular part(L=3),GO:0044464-cell part(L=2),	GO:0003674-molecular_function(L=0),GO:0003824-catalytic activity(L=1),GO:0008081-phosphoric diester hydrolase activity(L=5),GO:0016787-hydrolase activity(L=2),GO:0016788-hydrolase activity, acting on ester bonds(L=3),GO:0042578-phosphoric ester hydrolase activity(L=4),	GO:0006281-DNA repair(L=5),	GO:0005634-nucleus(L=5),	GO:0008081-phosphoric diester hydrolase activity(L=5),	Reactome: R-HSA-5693571	IPR010347(Tyrosyl-DNA phosphodiesterase I)	Pfam	PF06087(Tyrosyl-DNA phosphodiesterase)	8.4e-49
FC072V.10670.1	Complete	KAF5685288.1	100	476	0	0	1	476	1	476	7.9e-260	100	KAF5685288.1 manganese peroxidase 2 [Fusarium circinatum]	fusarium circinatum	fusarium circinatum;fusarium fujikuroi species complex;fusarium;nectriaceae;hypocreales;hypocreomycetidae;sordariomycetes;sordariomyceta;leotiomyceta;pezizomycotina;saccharomyceta;ascomycota;dikarya;fungi;opisthokonta;eukaryota;cellular organisms;root	/LUSTRE/HOME/uva_dpvrf_1/uva_dpvrf_1_3/annotation/entap_outfiles/similarity_search/DIAMOND/blastp_transcripts_fc072v_final_nr.out	No	Yes							117187.FVEG_09149T0	4.5e-251	872.1		Fungi	fuNOG[21]	049F2@ascNOG,0II1B@euNOG,0PMVS@fuNOG,0SDXB@hypNOG,0WWBV@necNOG,0ZS1R@NOG,13PNQ@opiNOG,1A70G@sordNOG		GO:0000302-response to reactive oxygen species(L=4),GO:0006725-cellular aromatic compound metabolic process(L=3),GO:0006950-response to stress(L=2),GO:0006979-response to oxidative stress(L=3),GO:0008150-biological_process(L=0),GO:0008152-metabolic process(L=1),GO:0009056-catabolic process(L=2),GO:0009698-phenylpropanoid metabolic process(L=3),GO:0009808-lignin metabolic process(L=4),GO:0009987-c…	GO:0005575-cellular_component(L=0),GO:0005576-extracellular region(L=1),	GO:0003674-molecular_function(L=0),GO:0003824-catalytic activity(L=1),GO:0004601-peroxidase activity(L=2),GO:0005488-binding(L=1),GO:0016209-antioxidant activity(L=1),GO:0016491-oxidoreductase activity(L=2),GO:0016684-oxidoreductase activity, acting on peroxide as acceptor(L=3),GO:0016690-diarylpropane peroxidase activity(L=3),GO:0020037-heme binding(L=4),GO:0043167-ion binding(L=2),GO:0043169-ca…	GO:0006979-response to oxidative stress(L=3),GO:0055114-oxidation-reduction process(L=3),		GO:0004601-peroxidase activity(L=2),GO:0020037-heme binding(L=4),		IPR002016(Haem peroxidase)	Pfam	PF00141(Peroxidase)	1.2e-27
FC072V.10667.1	Complete	KAF5682746.1	100	323	0	0	1	323	1	323	5.5e-180	100	KAF5682746.1 succinate fumarate mitochondrial transporter [Fusarium circinatum]	fusarium circinatum	fusarium circinatum;fusarium fujikuroi species complex;fusarium;nectriaceae;hypocreales;hypocreomycetidae;sordariomycetes;sordariomyceta;leotiomyceta;pezizomycotina;saccharomyceta;ascomycota;dikarya;fungi;opisthokonta;eukaryota;cellular organisms;root	/LUSTRE/HOME/uva_dpvrf_1/uva_dpvrf_1_3/annotation/entap_outfiles/similarity_search/DIAMOND/blastp_transcripts_fc072v_final_nr.out	No	Yes							117187.FVEG_05572T0	5.7e-181	638.6	SFC1	Fungi	fuNOG[21]	03ITV@ascNOG,0PFV9@fuNOG,0SBTY@hypNOG,0WYXS@necNOG,0YAYP@NOG,12PYT@opiNOG,19N68@sordNOG,KOG0756@euNOG		GO:0006082-organic acid metabolic process(L=3),GO:0006083-acetate metabolic process(L=7),GO:0006629-lipid metabolic process(L=3),GO:0006631-fatty acid metabolic process(L=4),GO:0006810-transport(L=3),GO:0006811-ion transport(L=4),GO:0006820-anion transport(L=5),GO:0006835-dicarboxylic acid transport(L=7),GO:0008150-biological_process(L=0),GO:0008152-metabolic process(L=1),GO:0009056-catabolic pro…	GO:0005575-cellular_component(L=0),GO:0005622-intracellular(L=3),GO:0005623-cell(L=1),GO:0005737-cytoplasm(L=4),GO:0005739-mitochondrion(L=5),GO:0005740-mitochondrial envelope(L=6),GO:0005743-mitochondrial inner membrane(L=5),GO:0016020-membrane(L=1),GO:0016021-integral component of membrane(L=4),GO:0019866-organelle inner membrane(L=4),GO:0031090-organelle membrane(L=3),GO:0031224-intrinsic comp…	GO:0003674-molecular_function(L=0),GO:0005215-transporter activity(L=1),GO:0005310-dicarboxylic acid transmembrane transporter activity(L=6),GO:0005342-organic acid transmembrane transporter activity(L=4),GO:0005469-succinate:fumarate antiporter activity(L=6),GO:0008509-anion transmembrane transporter activity(L=5),GO:0008514-organic anion transmembrane transporter activity(L=6),GO:0015075-ion tr…					IPR018108(Mitochondrial substrate/solute carrier)	Pfam	PF00153(Mitochondrial carrier protein)	3.3e-22
FC072V.10663.1	Partial 5 Prime	KAF5682743.1	100	159	0	0	11	169	1	159	3.6e-82	94.1	KAF5682743.1 hypothetical protein FCIRC_4794 [Fusarium circinatum]	fusarium circinatum	fusarium circinatum;fusarium fujikuroi species complex;fusarium;nectriaceae;hypocreales;hypocreomycetidae;sordariomycetes;sordariomyceta;leotiomyceta;pezizomycotina;saccharomyceta;ascomycota;dikarya;fungi;opisthokonta;eukaryota;cellular organisms;root	/LUSTRE/HOME/uva_dpvrf_1/uva_dpvrf_1_3/annotation/entap_outfiles/similarity_search/DIAMOND/blastp_transcripts_fc072v_final_nr.out	No	No							5507.FOXG_02387P0	3.6e-78	296.2	FG06573.1	Fungi	fuNOG[21]	041XW@ascNOG,0JN85@euNOG,0Q03N@fuNOG,0SJST@hypNOG,119BS@NOG,14CA7@opiNOG,19TUG@sordNOG		GO:0006139-nucleobase-containing compound metabolic process(L=3),GO:0006351-transcription, DNA-templated(L=5),GO:0006355-regulation of transcription, DNA-templated(L=7),GO:0006357-regulation of transcription from RNA polymerase II promoter(L=8),GO:0006366-transcription from RNA polymerase II promoter(L=6),GO:0006725-cellular aromatic compound metabolic process(L=3),GO:0006807-nitrogen compound me…	GO:0005575-cellular_component(L=0),GO:0005622-intracellular(L=3),GO:0005623-cell(L=1),GO:0005634-nucleus(L=5),GO:0005654-nucleoplasm(L=5),GO:0016592-mediator complex(L=7),GO:0031974-membrane-enclosed lumen(L=1),GO:0031981-nuclear lumen(L=6),GO:0032991-macromolecular complex(L=1),GO:0043226-organelle(L=1),GO:0043227-membrane-bounded organelle(L=2),GO:0043229-intracellular organelle(L=3),GO:0043231…	GO:0000988-transcription factor activity, protein binding(L=1),GO:0000989-transcription factor activity, transcription factor binding(L=2),GO:0001076-transcription factor activity, RNA polymerase II transcription factor binding(L=3),GO:0001104-RNA polymerase II transcription cofactor activity(L=4),GO:0003674-molecular_function(L=0),GO:0003712-transcription cofactor activity(L=3),	GO:0006357-regulation of transcription from RNA polymerase II promoter(L=8),	GO:0016592-mediator complex(L=7),	GO:0003712-transcription cofactor activity(L=3),	Reactome: R-HSA-1989781|Reactome: R-HSA-381340	IPR009332(Mediator of RNA polymerase II transcription subunit 22)	Pfam	PF06179(Surfeit locus protein 5 subunit 22 of Mediator complex)	2e-22
FC072V.10660.2	Partial 5 Prime
FC072V.10660.1	Complete	KAF5673722.1	100	425	0	0	1	425	1	425	1.4e-247	100	KAF5673722.1 2-polyprenyl-6-methoxyphenol hydroxylase [Fusarium circinatum]	fusarium circinatum	fusarium circinatum;fusarium fujikuroi species complex;fusarium;nectriaceae;hypocreales;hypocreomycetidae;sordariomycetes;sordariomyceta;leotiomyceta;pezizomycotina;saccharomyceta;ascomycota;dikarya;fungi;opisthokonta;eukaryota;cellular organisms;root	/LUSTRE/HOME/uva_dpvrf_1/uva_dpvrf_1_3/annotation/entap_outfiles/similarity_search/DIAMOND/blastp_transcripts_fc072v_final_nr.out	No	Yes							117187.FVEG_12971T0	1.9e-237	826.6	FG03824.1	Fungi	fuNOG[21]	03X9T@ascNOG,0J9XB@euNOG,0PWI8@fuNOG,0SIAM@hypNOG,0WUDN@necNOG,141ET@opiNOG,19PVP@sordNOG,COG0654@NOG		GO:0008150-biological_process(L=0),GO:0008152-metabolic process(L=1),GO:0044710-single-organism metabolic process(L=2),GO:0055114-oxidation-reduction process(L=3),		GO:0003674-molecular_function(L=0),GO:0003824-catalytic activity(L=1),GO:0016491-oxidoreductase activity(L=2),			GO:0071949-FAD binding(L=5),		IPR002938(FAD-binding domain)	Pfam	PF01494(FAD binding domain)	2e-14
FC072V.10659.1
FC072V.10658.1	Partial 5 Prime	KAF5558127.1	95.9	172	7	0	1	172	101	272	5.5e-86	100	KAF5558127.1 aspartate racemase [Fusarium mexicanum]	fusarium mexicanum	fusarium mexicanum;fusarium fujikuroi species complex;fusarium;nectriaceae;hypocreales;hypocreomycetidae;sordariomycetes;sordariomyceta;leotiomyceta;pezizomycotina;saccharomyceta;ascomycota;dikarya;fungi;opisthokonta;eukaryota;cellular organisms;root	/LUSTRE/HOME/uva_dpvrf_1/uva_dpvrf_1_3/annotation/entap_outfiles/similarity_search/DIAMOND/blastp_transcripts_fc072v_final_nr.out	No	Yes							441960.XP_002153397.1	8e-41	172.2		Fungi	fuNOG[21]	040EP@ascNOG,0JDUK@euNOG,0PY3V@fuNOG,0YNC1@NOG,146HG@opiNOG		GO:0006807-nitrogen compound metabolic process(L=2),GO:0008150-biological_process(L=0),GO:0008152-metabolic process(L=1),		GO:0003674-molecular_function(L=0),GO:0003824-catalytic activity(L=1),GO:0016853-isomerase activity(L=2),GO:0016854-racemase and epimerase activity(L=3),GO:0016855-racemase and epimerase activity, acting on amino acids and derivatives(L=4),GO:0036361-racemase activity, acting on amino acids and derivatives(L=5),	GO:0006807-nitrogen compound metabolic process(L=2),		GO:0036361-racemase activity, acting on amino acids and derivatives(L=5),	KEGG: 00471+5.1.1.3|MetaCyc: PWY-6386|MetaCyc: PWY-6387	IPR015942(Asp/Glu/hydantoin racemase)	Pfam	PF01177(Asp/Glu/Hydantoin racemase)	1.3e-07
FC072V.10652.1
FC072V.10654.1	Internal	OAQ99206.1	77	248	55	2	2	248	238	484	9.3e-111	99.6	OAQ99206.1 hypothetical protein LLEC1_08104, partial [Akanthomyces lecanii]	akanthomyces lecanii	akanthomyces;cordycipitaceae;hypocreales;hypocreomycetidae;sordariomycetes;sordariomyceta;leotiomyceta;pezizomycotina;saccharomyceta;ascomycota;dikarya;fungi;opisthokonta;eukaryota;cellular organisms;root	/LUSTRE/HOME/uva_dpvrf_1/uva_dpvrf_1_3/annotation/entap_outfiles/similarity_search/DIAMOND/blastp_transcripts_fc072v_final_nr.out	No	No							5507.FOXG_05440P0	1.9e-139	500.4	UTP25	Fungi	fuNOG[21]	03J2U@ascNOG,0PG4V@fuNOG,0SATF@hypNOG,0XP00@NOG,12Q4T@opiNOG,19MMH@sordNOG,KOG2340@euNOG		GO:0000462-maturation of SSU-rRNA from tricistronic rRNA transcript (SSU-rRNA, 5.8S rRNA, LSU-rRNA)(L=9),GO:0006139-nucleobase-containing compound metabolic process(L=3),GO:0006364-rRNA processing(L=7),GO:0006396-RNA processing(L=5),GO:0006725-cellular aromatic compound metabolic process(L=3),GO:0006807-nitrogen compound metabolic process(L=2),GO:0008150-biological_process(L=0),GO:0008152-metabol…	GO:0005575-cellular_component(L=0),GO:0005622-intracellular(L=3),GO:0005623-cell(L=1),GO:0005634-nucleus(L=5),GO:0005730-nucleolus(L=5),GO:0030529-intracellular ribonucleoprotein complex(L=4),GO:0030684-preribosome(L=5),GO:0031974-membrane-enclosed lumen(L=1),GO:0031981-nuclear lumen(L=6),GO:0032040-small-subunit processome(L=6),GO:0032991-macromolecular complex(L=1),GO:0043226-organelle(L=1),GO:…	GO:0003674-molecular_function(L=0),GO:0003676-nucleic acid binding(L=3),GO:0003723-RNA binding(L=4),GO:0005488-binding(L=1),GO:0019843-rRNA binding(L=5),GO:0030515-snoRNA binding(L=5),GO:0034511-U3 snoRNA binding(L=6),GO:0097159-organic cyclic compound binding(L=2),GO:1901363-heterocyclic compound binding(L=2),		GO:0005634-nucleus(L=5),		Reactome: R-HSA-6790901|Reactome: R-HSA-6791226	IPR010678(Digestive organ expansion factor, predicted)	Pfam	PF06862(Utp25, U3 small nucleolar RNA-associated SSU processome protein 25)	5.2e-111
FC072V.10644.1	Complete	KAF5658466.1	100	208	0	0	1	208	1	208	7.6e-98	100	KAF5658466.1 cwf18 pre-mrna splicing factor [Fusarium circinatum]	fusarium circinatum	fusarium circinatum;fusarium fujikuroi species complex;fusarium;nectriaceae;hypocreales;hypocreomycetidae;sordariomycetes;sordariomyceta;leotiomyceta;pezizomycotina;saccharomyceta;ascomycota;dikarya;fungi;opisthokonta;eukaryota;cellular organisms;root	/LUSTRE/HOME/uva_dpvrf_1/uva_dpvrf_1_3/annotation/entap_outfiles/similarity_search/DIAMOND/blastp_transcripts_fc072v_final_nr.out	No	Yes							117187.FVEG_02701T0	7.3e-97	358.6	FG10072.1	Fungi	fuNOG[21]	03S4V@ascNOG,0PQDR@fuNOG,0SEI2@hypNOG,0WZ2P@necNOG,11R31@NOG,13R91@opiNOG,19RHY@sordNOG,KOG3407@euNOG	3040	GO:0000375-RNA splicing, via transesterification reactions(L=7),GO:0000377-RNA splicing, via transesterification reactions with bulged adenosine as nucleophile(L=8),GO:0000398-mRNA splicing, via spliceosome(L=7),GO:0006139-nucleobase-containing compound metabolic process(L=3),GO:0006396-RNA processing(L=5),GO:0006397-mRNA processing(L=7),GO:0006725-cellular aromatic compound metabolic process(L=3…	GO:0005575-cellular_component(L=0),GO:0005622-intracellular(L=3),GO:0005623-cell(L=1),GO:0005634-nucleus(L=5),GO:0005681-spliceosomal complex(L=6),GO:0005737-cytoplasm(L=4),GO:0005829-cytosol(L=4),GO:0030529-intracellular ribonucleoprotein complex(L=4),GO:0032991-macromolecular complex(L=1),GO:0043226-organelle(L=1),GO:0043227-membrane-bounded organelle(L=2),GO:0043229-intracellular organelle(L=3…						IPR013169(mRNA splicing factor Cwf18-like)	Pfam	PF08315(cwf18 pre-mRNA splicing factor)	1.8e-46
FC072V.10647.1	Complete	XP_018172900.1	77.8	185	38	1	43	227	122	303	5.3e-76	80.8	XP_018172900.1 nodulation protein L [Purpureocillium lilacinum]	purpureocillium lilacinum	purpureocillium lilacinum;purpureocillium;ophiocordycipitaceae;hypocreales;hypocreomycetidae;sordariomycetes;sordariomyceta;leotiomyceta;pezizomycotina;saccharomyceta;ascomycota;dikarya;fungi;opisthokonta;eukaryota;cellular organisms;root	/LUSTRE/HOME/uva_dpvrf_1/uva_dpvrf_1_3/annotation/entap_outfiles/similarity_search/DIAMOND/blastp_transcripts_fc072v_final_nr.out	No	Yes							117187.FVEG_02704T0	1.2e-95	354.8	FG10069.1	Fungi	fuNOG[21]	03KFQ@ascNOG,0PHH7@fuNOG,0SB2Z@hypNOG,13FVG@opiNOG,19IE8@sordNOG,COG0110@NOG,KOG4750@euNOG		GO:0006139-nucleobase-containing compound metabolic process(L=3),GO:0006351-transcription, DNA-templated(L=5),GO:0006355-regulation of transcription, DNA-templated(L=7),GO:0006357-regulation of transcription from RNA polymerase II promoter(L=8),GO:0006366-transcription from RNA polymerase II promoter(L=6),GO:0006725-cellular aromatic compound metabolic process(L=3),GO:0006807-nitrogen compound me…	GO:0005575-cellular_component(L=0),GO:0005622-intracellular(L=3),GO:0005623-cell(L=1),GO:0005634-nucleus(L=5),GO:0043226-organelle(L=1),GO:0043227-membrane-bounded organelle(L=2),GO:0043229-intracellular organelle(L=3),GO:0043231-intracellular membrane-bounded organelle(L=4),GO:0044424-intracellular part(L=3),GO:0044464-cell part(L=2),	GO:0000166-nucleotide binding(L=3),GO:0000981-RNA polymerase II transcription factor activity, sequence-specific DNA binding(L=3),GO:0001071-nucleic acid binding transcription factor activity(L=1),GO:0003674-molecular_function(L=0),GO:0003676-nucleic acid binding(L=3),GO:0003700-transcription factor activity, sequence-specific DNA binding(L=2),GO:0003824-catalytic activity(L=1),GO:0005488-binding…					IPR001451(Hexapeptide repeat)	Pfam	PF14602(Hexapeptide repeat of succinyl-transferase)	3.5e-08
FC072V.10646.1	Complete	KAF5659286.1	100	268	0	0	1	268	204	471	2.6e-151	100	KAF5659286.1 CK1 CK1 CK1-G kinase [Fusarium circinatum]	fusarium circinatum	fusarium circinatum;fusarium fujikuroi species complex;fusarium;nectriaceae;hypocreales;hypocreomycetidae;sordariomycetes;sordariomyceta;leotiomyceta;pezizomycotina;saccharomyceta;ascomycota;dikarya;fungi;opisthokonta;eukaryota;cellular organisms;root	/LUSTRE/HOME/uva_dpvrf_1/uva_dpvrf_1_3/annotation/entap_outfiles/similarity_search/DIAMOND/blastp_transcripts_fc072v_final_nr.out	No	Yes							117187.FVEG_02707T0	2.7e-152	543.1	PGUG_01558	Fungi	fuNOG[21]	03ICV@ascNOG,0PFDM@fuNOG,0SFGP@hypNOG,0WU0H@necNOG,0XNXP@NOG,12NZ9@opiNOG,19J0E@sordNOG,KOG1165@euNOG	4340	GO:0000902-cell morphogenesis(L=5),GO:0000910-cytokinesis(L=4),GO:0006464-cellular protein modification process(L=5),GO:0006468-protein phosphorylation(L=6),GO:0006793-phosphorus metabolic process(L=3),GO:0006796-phosphate-containing compound metabolic process(L=4),GO:0006810-transport(L=3),GO:0006897-endocytosis(L=5),GO:0007049-cell cycle(L=3),GO:0007154-cell communication(L=2),GO:0007165-signal…	GO:0000322-storage vacuole(L=6),GO:0000323-lytic vacuole(L=6),GO:0000324-fungal-type vacuole(L=7),GO:0000329-fungal-type vacuole membrane(L=7),GO:0005575-cellular_component(L=0),GO:0005622-intracellular(L=3),GO:0005623-cell(L=1),GO:0005737-cytoplasm(L=4),GO:0005739-mitochondrion(L=5),GO:0005773-vacuole(L=5),GO:0005774-vacuolar membrane(L=6),GO:0005783-endoplasmic reticulum(L=4),GO:0005886-plasma …	GO:0000166-nucleotide binding(L=3),GO:0001882-nucleoside binding(L=3),GO:0001883-purine nucleoside binding(L=4),GO:0003674-molecular_function(L=0),GO:0003824-catalytic activity(L=1),GO:0004672-protein kinase activity(L=5),GO:0004674-protein serine/threonine kinase activity(L=6),GO:0005488-binding(L=1),GO:0005524-ATP binding(L=7),GO:0016301-kinase activity(L=4),GO:0016740-transferase activity(L=2)…
FC072V.10642.2	Partial 3 Prime	KAF4623990.1	44.3	106	56	3	2	106	25	128	1e-08	56.5	KAF4623990.1 hypothetical protein G7Y89_g14186 [Cudoniella acicularis]	cudoniella acicularis	cudoniella acicularis;cudoniella;helotiaceae;helotiales;leotiomycetes;sordariomyceta;leotiomyceta;pezizomycotina;saccharomyceta;ascomycota;dikarya;fungi;opisthokonta;eukaryota;cellular organisms;root	/LUSTRE/HOME/uva_dpvrf_1/uva_dpvrf_1_3/annotation/entap_outfiles/similarity_search/DIAMOND/blastp_transcripts_fc072v_final_nr.out	No	No							5507.FOXG_05426P0	3.1e-38	163.7	FG10065.1	Fungi	fuNOG[21]	03WNG@ascNOG,0JRBT@euNOG,0PRYC@fuNOG,0SIZK@hypNOG,128KJ@NOG,13X2I@opiNOG,19Q4P@sordNOG	910	GO:0008150-biological_process(L=0),GO:0008152-metabolic process(L=1),GO:0044710-single-organism metabolic process(L=2),GO:0055114-oxidation-reduction process(L=3),		GO:0003674-molecular_function(L=0),GO:0003824-catalytic activity(L=1),GO:0004497-monooxygenase activity(L=3),GO:0016491-oxidoreductase activity(L=2),GO:0016701-oxidoreductase activity, acting on single donors with incorporation of molecular oxygen(L=3),GO:0016702-oxidoreductase activity, acting on single donors with incorporation of molecular oxygen, incorporation of two atoms of oxygen(L=4),GO:0…	GO:0055114-oxidation-reduction process(L=3),		GO:0018580-nitronate monooxygenase activity(L=5),		IPR004136(Nitronate monooxygenase)	Pfam	PF03060(Nitronate monooxygenase)	9.2e-15
FC072V.10636.1	Complete	XP_031063578.1	97.8	181	4	0	1	181	1	181	6.6e-98	100	XP_031063578.1 GAF protein [Fusarium odoratissimum NRRL 54006]	fusarium odoratissimum nrrl 54006	fusarium odoratissimum;fusarium oxysporum species complex;fusarium;nectriaceae;hypocreales;hypocreomycetidae;sordariomycetes;sordariomyceta;leotiomyceta;pezizomycotina;saccharomyceta;ascomycota;dikarya;fungi;opisthokonta;eukaryota;cellular organisms;root	/LUSTRE/HOME/uva_dpvrf_1/uva_dpvrf_1_3/annotation/entap_outfiles/similarity_search/DIAMOND/blastp_transcripts_fc072v_final_nr.out	No	Yes							5507.FOXG_05423P0	1.8e-99	367.1	FG10062.1	Fungi	fuNOG[21]	03RFD@ascNOG,0IWJG@euNOG,0PNJ2@fuNOG,0SD2U@hypNOG,13Q63@opiNOG,19P5H@sordNOG,COG1956@NOG	270	GO:0006355-regulation of transcription, DNA-templated(L=7),GO:0006950-response to stress(L=2),GO:0006979-response to oxidative stress(L=3),GO:0007275-multicellular organism development(L=3),GO:0008150-biological_process(L=0),GO:0008152-metabolic process(L=1),GO:0009889-regulation of biosynthetic process(L=4),GO:0009987-cellular process(L=1),GO:0010468-regulation of gene expression(L=5),GO:0010556…	GO:0005575-cellular_component(L=0),GO:0005622-intracellular(L=3),GO:0005623-cell(L=1),GO:0005634-nucleus(L=5),GO:0005737-cytoplasm(L=4),GO:0043226-organelle(L=1),GO:0043227-membrane-bounded organelle(L=2),GO:0043229-intracellular organelle(L=3),GO:0043231-intracellular membrane-bounded organelle(L=4),GO:0044424-intracellular part(L=3),GO:0044464-cell part(L=2),	GO:0001071-nucleic acid binding transcription factor activity(L=1),GO:0003674-molecular_function(L=0),GO:0003676-nucleic acid binding(L=3),GO:0003677-DNA binding(L=4),GO:0003700-transcription factor activity, sequence-specific DNA binding(L=2),GO:0003824-catalytic activity(L=1),GO:0005488-binding(L=1),GO:0016491-oxidoreductase activity(L=2),GO:0016667-oxidoreductase activity, acting on a sulfur g…			GO:0005515-protein binding(L=2),		IPR003018(GAF domain)	Pfam	PF13185(GAF domain)	1.4e-08
FC072V.10626.1	Partial 5 Prime	RBQ65637.1	75.4	260	62	2	1	259	212	470	1e-102	94.9	RBQ65637.1 hypothetical protein FVER14953_03555 [Fusarium verticillioides]	fusarium verticillioides	fusarium verticillioides;fusarium fujikuroi species complex;fusarium;nectriaceae;hypocreales;hypocreomycetidae;sordariomycetes;sordariomyceta;leotiomyceta;pezizomycotina;saccharomyceta;ascomycota;dikarya;fungi;opisthokonta;eukaryota;cellular organisms;root	/LUSTRE/HOME/uva_dpvrf_1/uva_dpvrf_1_3/annotation/entap_outfiles/similarity_search/DIAMOND/blastp_transcripts_fc072v_final_nr.out	No	No							5507.FOXG_05691P0	6.6e-106	389		Fungi	fuNOG[21]	04BS7@ascNOG,0KN4U@euNOG,0Q917@fuNOG,0SJCC@hypNOG,10XTZ@NOG,138DG@opiNOG,1A29Q@sordNOG
FC072V.10624.1	Complete	KAF5547458.1	98.2	560	10	0	1	560	1	560	0	100	KAF5547458.1 alpha-mannosidase 1a [Fusarium mexicanum]	fusarium mexicanum	fusarium mexicanum;fusarium fujikuroi species complex;fusarium;nectriaceae;hypocreales;hypocreomycetidae;sordariomycetes;sordariomyceta;leotiomyceta;pezizomycotina;saccharomyceta;ascomycota;dikarya;fungi;opisthokonta;eukaryota;cellular organisms;root	/LUSTRE/HOME/uva_dpvrf_1/uva_dpvrf_1_3/annotation/entap_outfiles/similarity_search/DIAMOND/blastp_transcripts_fc072v_final_nr.out	No	Yes							117187.FVEG_03557T0	0	1121.3	FG00659.1	Fungi	fuNOG[21]	03Y1V@ascNOG,0PG1N@fuNOG,0SF7Y@hypNOG,0WVC8@necNOG,0XP04@NOG,13J24@opiNOG,1A3KC@sordNOG,KOG2431@euNOG	51051311004141	GO:0008150-biological_process(L=0),GO:0008152-metabolic process(L=1),	GO:0005575-cellular_component(L=0),GO:0016020-membrane(L=1),	GO:0003674-molecular_function(L=0),GO:0003824-catalytic activity(L=1),GO:0004553-hydrolase activity, hydrolyzing O-glycosyl compounds(L=4),GO:0004559-alpha-mannosidase activity(L=6),GO:0004571-mannosyl-oligosaccharide 1,2-alpha-mannosidase activity(L=8),GO:0005488-binding(L=1),GO:0005509-calcium ion binding(L=5),GO:0015923-mannosidase activity(L=5),GO:0015924-mannosyl-oligosaccharide mannosidase …		GO:0016020-membrane(L=1),	GO:0004571-mannosyl-oligosaccharide 1,2-alpha-mannosidase activity(L=8),GO:0005509-calcium ion binding(L=5),		IPR001382(Glycoside hydrolase family 47)	Pfam	PF01532(Glycosyl hydrolase family 47)	4.2e-168
FC072V.10620.1	Complete	KAF5661722.1	99.8	597	1	0	1	597	1	597	0	100	KAF5661722.1 hypothetical protein FCIRC_11748 [Fusarium circinatum]	fusarium circinatum	fusarium circinatum;fusarium fujikuroi species complex;fusarium;nectriaceae;hypocreales;hypocreomycetidae;sordariomycetes;sordariomyceta;leotiomyceta;pezizomycotina;saccharomyceta;ascomycota;dikarya;fungi;opisthokonta;eukaryota;cellular organisms;root	/LUSTRE/HOME/uva_dpvrf_1/uva_dpvrf_1_3/annotation/entap_outfiles/similarity_search/DIAMOND/blastp_transcripts_fc072v_final_nr.out	No	No							5518.FGSG_04928P0	3.9e-260	902.5	FG04928.1	Fungi	fuNOG[21]	03VU3@ascNOG,0J8N9@euNOG,0PU4S@fuNOG,0SDYP@hypNOG,0X02V@necNOG,0YETN@NOG,1404N@opiNOG,1A5SM@sordNOG
FC072V.10751.3	Complete	KAF5596905.1	98.9	186	2	0	1	186	59	244	1.5e-100	100	KAF5596905.1 ribosomal RNA large subunit methyltransferase J [Fusarium subglutinans]	fusarium subglutinans	fusarium subglutinans;fusarium fujikuroi species complex;fusarium;nectriaceae;hypocreales;hypocreomycetidae;sordariomycetes;sordariomyceta;leotiomyceta;pezizomycotina;saccharomyceta;ascomycota;dikarya;fungi;opisthokonta;eukaryota;cellular organisms;root	/LUSTRE/HOME/uva_dpvrf_1/uva_dpvrf_1_3/annotation/entap_outfiles/similarity_search/DIAMOND/blastp_transcripts_fc072v_final_nr.out	No	Yes							117187.FVEG_02579T0	4e-54	216.5		Fungi	fuNOG[21]	04BS8@ascNOG,0Q916@fuNOG,0SJFE@hypNOG,138DH@opiNOG,1A29P@sordNOG,COG0293@NOG,KOG4589@euNOG		GO:0001510-RNA methylation(L=4),GO:0006139-nucleobase-containing compound metabolic process(L=3),GO:0006725-cellular aromatic compound metabolic process(L=3),GO:0006807-nitrogen compound metabolic process(L=2),GO:0008150-biological_process(L=0),GO:0008152-metabolic process(L=1),GO:0009451-RNA modification(L=5),GO:0009987-cellular process(L=1),GO:0016070-RNA metabolic process(L=4),GO:0032259-methy…		GO:0003674-molecular_function(L=0),GO:0003824-catalytic activity(L=1),GO:0008168-methyltransferase activity(L=4),GO:0016740-transferase activity(L=2),GO:0016741-transferase activity, transferring one-carbon groups(L=3),	GO:0032259-methylation(L=2),		GO:0008168-methyltransferase activity(L=4),		IPR002877(Ribosomal RNA methyltransferase FtsJ domain)	Pfam	PF01728(FtsJ-like methyltransferase)	2.9e-23
FC072V.10619.1	Complete	KAF5661724.1	93.1	334	1	1	12	345	157	468	1.5e-175	96.8	KAF5661724.1 hypothetical protein FCIRC_11750 [Fusarium circinatum]	fusarium circinatum	fusarium circinatum;fusarium fujikuroi species complex;fusarium;nectriaceae;hypocreales;hypocreomycetidae;sordariomycetes;sordariomyceta;leotiomyceta;pezizomycotina;saccharomyceta;ascomycota;dikarya;fungi;opisthokonta;eukaryota;cellular organisms;root	/LUSTRE/HOME/uva_dpvrf_1/uva_dpvrf_1_3/annotation/entap_outfiles/similarity_search/DIAMOND/blastp_transcripts_fc072v_final_nr.out	No	No							117187.FVEG_03561T0	3.5e-96	357.1		Fungi	fuNOG[21]	04AZK@ascNOG,0KNQQ@euNOG,0Q9SW@fuNOG,0SCQG@hypNOG,10X92@NOG,137MX@opiNOG,1A3WP@sordNOG		GO:0008150-biological_process(L=0),GO:0008152-metabolic process(L=1),GO:0044710-single-organism metabolic process(L=2),GO:0055114-oxidation-reduction process(L=3),		GO:0003674-molecular_function(L=0),GO:0003824-catalytic activity(L=1),GO:0016491-oxidoreductase activity(L=2),GO:0016705-oxidoreductase activity, acting on paired donors, with incorporation or reduction of molecular oxygen(L=3),GO:0016706-oxidoreductase activity, acting on paired donors, with incorporation or reduction of molecular oxygen, 2-oxoglutarate as one donor, and incorporation of one ato…	GO:0055114-oxidation-reduction process(L=3),		GO:0016491-oxidoreductase activity(L=2),		IPR005123(Oxoglutarate/iron-dependent dioxygenase)	Pfam	PF13640(2OG-Fe(II) oxygenase superfamily)	6.3e-09
FC072V.10613.2	Complete	KAF4439194.1	99.3	137	1	0	1	137	1	137	3.2e-76	100	KAF4439194.1 hypothetical protein FACUT_4271 [Fusarium acutatum]	fusarium acutatum	fusarium acutatum;fusarium fujikuroi species complex;fusarium;nectriaceae;hypocreales;hypocreomycetidae;sordariomycetes;sordariomyceta;leotiomyceta;pezizomycotina;saccharomyceta;ascomycota;dikarya;fungi;opisthokonta;eukaryota;cellular organisms;root	/LUSTRE/HOME/uva_dpvrf_1/uva_dpvrf_1_3/annotation/entap_outfiles/similarity_search/DIAMOND/blastp_transcripts_fc072v_final_nr.out	No	No							117187.FVEG_03570T0	6.5e-78	295	FG04917.1	Fungi	fuNOG[21]	03WB0@ascNOG,0J836@euNOG,0PT8Y@fuNOG,0SGTM@hypNOG,0X0K7@necNOG,0YKQM@NOG,13ZHI@opiNOG,1A6YM@sordNOG									IPR027843(Domain of unknown function DUF4440)	Pfam	PF14534(Domain of unknown function (DUF4440))	5.9e-08
FC072V.10613.1	Complete	KAF4439194.1	99.3	137	1	0	1	137	1	137	3.2e-76	100	KAF4439194.1 hypothetical protein FACUT_4271 [Fusarium acutatum]	fusarium acutatum	fusarium acutatum;fusarium fujikuroi species complex;fusarium;nectriaceae;hypocreales;hypocreomycetidae;sordariomycetes;sordariomyceta;leotiomyceta;pezizomycotina;saccharomyceta;ascomycota;dikarya;fungi;opisthokonta;eukaryota;cellular organisms;root	/LUSTRE/HOME/uva_dpvrf_1/uva_dpvrf_1_3/annotation/entap_outfiles/similarity_search/DIAMOND/blastp_transcripts_fc072v_final_nr.out	No	No							117187.FVEG_03570T0	6.5e-78	295	FG04917.1	Fungi	fuNOG[21]	03WB0@ascNOG,0J836@euNOG,0PT8Y@fuNOG,0SGTM@hypNOG,0X0K7@necNOG,0YKQM@NOG,13ZHI@opiNOG,1A6YM@sordNOG									IPR027843(Domain of unknown function DUF4440)	Pfam	PF14534(Domain of unknown function (DUF4440))	5.9e-08
FC072V.10611.1	Partial 5 Prime	KAF5530499.1	99.2	610	5	0	1	610	300	909	0	100	KAF5530499.1 hypothetical protein FMEXI_13508 [Fusarium mexicanum]	fusarium mexicanum	fusarium mexicanum;fusarium fujikuroi species complex;fusarium;nectriaceae;hypocreales;hypocreomycetidae;sordariomycetes;sordariomyceta;leotiomyceta;pezizomycotina;saccharomyceta;ascomycota;dikarya;fungi;opisthokonta;eukaryota;cellular organisms;root	/LUSTRE/HOME/uva_dpvrf_1/uva_dpvrf_1_3/annotation/entap_outfiles/similarity_search/DIAMOND/blastp_transcripts_fc072v_final_nr.out	No	No							117187.FVEG_03571T0	0	1091.6	FG04916.1	Fungi	fuNOG[21]	040HV@ascNOG,0JFY2@euNOG,0PY7B@fuNOG,0SJ51@hypNOG,0WX1J@necNOG,0ZCYG@NOG,147RX@opiNOG,1A5XQ@sordNOG
FC072V.10638.1	Partial 5 Prime	KAF5659288.1	100	334	0	0	1	334	293	626	1.3e-131	100	KAF5659288.1 SWR1-complex 4 [Fusarium circinatum]	fusarium circinatum	fusarium circinatum;fusarium fujikuroi species complex;fusarium;nectriaceae;hypocreales;hypocreomycetidae;sordariomycetes;sordariomyceta;leotiomyceta;pezizomycotina;saccharomyceta;ascomycota;dikarya;fungi;opisthokonta;eukaryota;cellular organisms;root	/LUSTRE/HOME/uva_dpvrf_1/uva_dpvrf_1_3/annotation/entap_outfiles/similarity_search/DIAMOND/blastp_transcripts_fc072v_final_nr.out	No	Yes							5507.FOXG_05430P0	1.1e-121	441.8	SWC4	Fungi	fuNOG[21]	03PSE@ascNOG,0PK52@fuNOG,0SAFZ@hypNOG,0XSA4@NOG,12U14@opiNOG,19PPI@sordNOG,KOG2656@euNOG		GO:0000070-mitotic sister chromatid segregation(L=5),GO:0000278-mitotic cell cycle(L=4),GO:0000280-nuclear division(L=5),GO:0000819-sister chromatid segregation(L=6),GO:0006139-nucleobase-containing compound metabolic process(L=3),GO:0006259-DNA metabolic process(L=4),GO:0006281-DNA repair(L=5),GO:0006325-chromatin organization(L=4),GO:0006338-chromatin remodeling(L=5),GO:0006351-transcription, D…	GO:0000123-histone acetyltransferase complex(L=7),GO:0000228-nuclear chromosome(L=5),GO:0000785-chromatin(L=5),GO:0000790-nuclear chromatin(L=5),GO:0000812-Swr1 complex(L=5),GO:0005575-cellular_component(L=0),GO:0005622-intracellular(L=3),GO:0005623-cell(L=1),GO:0005634-nucleus(L=5),GO:0005654-nucleoplasm(L=5),GO:0005694-chromosome(L=4),GO:0031974-membrane-enclosed lumen(L=1),GO:0031981-nuclear l…	GO:0003674-molecular_function(L=0),GO:0003676-nucleic acid binding(L=3),GO:0003677-DNA binding(L=4),GO:0003682-chromatin binding(L=3),GO:0003824-catalytic activity(L=1),GO:0005488-binding(L=1),GO:0008168-methyltransferase activity(L=4),GO:0016740-transferase activity(L=2),GO:0016741-transferase activity, transferring one-carbon groups(L=3),GO:0097159-organic cyclic compound binding(L=2),GO:190136…
FC072V.10616.1
FC072V.10615.1	Partial 5 Prime	CVK94390.1	98.6	139	2	0	38	176	15	153	2.6e-59	79	CVK94390.1 related to RNA-binding protein Y14 [Fusarium mangiferae]	fusarium mangiferae	fusarium mangiferae;fusarium fujikuroi species complex;fusarium;nectriaceae;hypocreales;hypocreomycetidae;sordariomycetes;sordariomyceta;leotiomyceta;pezizomycotina;saccharomyceta;ascomycota;dikarya;fungi;opisthokonta;eukaryota;cellular organisms;root	/LUSTRE/HOME/uva_dpvrf_1/uva_dpvrf_1_3/annotation/entap_outfiles/similarity_search/DIAMOND/blastp_transcripts_fc072v_final_nr.out	No	Yes							5507.FOXG_05707P0	7.1e-61	238.8	FG04914.1	Fungi	fuNOG[21]	03T0N@ascNOG,0PPRS@fuNOG,0SBNN@hypNOG,11IHM@NOG,13SH6@opiNOG,19S9T@sordNOG,KOG0130@euNOG	301330153040	GO:0000375-RNA splicing, via transesterification reactions(L=7),GO:0000377-RNA splicing, via transesterification reactions with bulged adenosine as nucleophile(L=8),GO:0000398-mRNA splicing, via spliceosome(L=7),GO:0006139-nucleobase-containing compound metabolic process(L=3),GO:0006396-RNA processing(L=5),GO:0006397-mRNA processing(L=7),GO:0006725-cellular aromatic compound metabolic process(L=3…	GO:0005575-cellular_component(L=0),GO:0005622-intracellular(L=3),GO:0005623-cell(L=1),GO:0005634-nucleus(L=5),GO:0005737-cytoplasm(L=4),GO:0005829-cytosol(L=4),GO:0030529-intracellular ribonucleoprotein complex(L=4),GO:0032991-macromolecular complex(L=1),GO:0043226-organelle(L=1),GO:0043227-membrane-bounded organelle(L=2),GO:0043229-intracellular organelle(L=3),GO:0043231-intracellular membrane-b…	GO:0000166-nucleotide binding(L=3),GO:0003674-molecular_function(L=0),GO:0003676-nucleic acid binding(L=3),GO:0003723-RNA binding(L=4),GO:0005488-binding(L=1),GO:0036094-small molecule binding(L=2),GO:0097159-organic cyclic compound binding(L=2),GO:1901265-nucleoside phosphate binding(L=3),GO:1901363-heterocyclic compound binding(L=2),			GO:0003676-nucleic acid binding(L=3),		IPR000504(RNA recognition motif domain)	Pfam	PF00076(RNA recognition motif. (a.k.a. RRM, RBD, or RNP domain))	5.4e-15
FC072V.10614.1	Partial 5 Prime	KAF5611736.1	99.4	684	4	0	1	684	175	858	0	100	KAF5611736.1 beta-glucosidase [Fusarium subglutinans]	fusarium subglutinans	fusarium subglutinans;fusarium fujikuroi species complex;fusarium;nectriaceae;hypocreales;hypocreomycetidae;sordariomycetes;sordariomyceta;leotiomyceta;pezizomycotina;saccharomyceta;ascomycota;dikarya;fungi;opisthokonta;eukaryota;cellular organisms;root	/LUSTRE/HOME/uva_dpvrf_1/uva_dpvrf_1_3/annotation/entap_outfiles/similarity_search/DIAMOND/blastp_transcripts_fc072v_final_nr.out	No	Yes							5507.FOXG_05708P0	0	1371.7	FG04913.1	Fungi	fuNOG[21]	03K1N@ascNOG,0IESU@euNOG,0PFI5@fuNOG,0SH1B@hypNOG,12S6W@opiNOG,19N7D@sordNOG,COG1472@NOG	4.60501e+16	GO:0005975-carbohydrate metabolic process(L=3),GO:0008150-biological_process(L=0),GO:0008152-metabolic process(L=1),GO:0044238-primary metabolic process(L=2),GO:0071704-organic substance metabolic process(L=2),		GO:0003674-molecular_function(L=0),GO:0003824-catalytic activity(L=1),GO:0004553-hydrolase activity, hydrolyzing O-glycosyl compounds(L=4),GO:0008422-beta-glucosidase activity(L=6),GO:0015926-glucosidase activity(L=5),GO:0016787-hydrolase activity(L=2),GO:0016798-hydrolase activity, acting on glycosyl bonds(L=3),	GO:0005975-carbohydrate metabolic process(L=3),		GO:0004553-hydrolase activity, hydrolyzing O-glycosyl compounds(L=4),		IPR002772(Glycoside hydrolase family 3 C-terminal domain)	Pfam	PF01915(Glycosyl hydrolase family 3 C-terminal domain)	4.1e-63
FC072V.10607.1
FC072V.10608.1	Partial 3 Prime	RKL08753.1	81.7	104	19	0	3	106	2	105	6.9e-39	98.1	RKL08753.1 hypothetical protein BFJ68_g9243 [Fusarium oxysporum]	fusarium oxysporum	fusarium oxysporum;fusarium oxysporum species complex;fusarium;nectriaceae;hypocreales;hypocreomycetidae;sordariomycetes;sordariomyceta;leotiomyceta;pezizomycotina;saccharomyceta;ascomycota;dikarya;fungi;opisthokonta;eukaryota;cellular organisms;root	/LUSTRE/HOME/uva_dpvrf_1/uva_dpvrf_1_3/annotation/entap_outfiles/similarity_search/DIAMOND/blastp_transcripts_fc072v_final_nr.out	No	No							117187.FVEG_03575T0	1.5e-21	107.5		Fungi	fuNOG[21]	04BGU@ascNOG,0KNC6@euNOG,0Q9AC@fuNOG,0SH7P@hypNOG,10XKV@NOG,1384C@opiNOG,1A2UQ@sordNOG
FC072V.10606.1	Complete	KAF5529059.1	94.9	118	6	0	1	118	1	118	3.7e-57	99.2	KAF5529059.1 hypothetical protein FMEXI_14382, partial [Fusarium mexicanum]	fusarium mexicanum	fusarium mexicanum;fusarium fujikuroi species complex;fusarium;nectriaceae;hypocreales;hypocreomycetidae;sordariomycetes;sordariomyceta;leotiomyceta;pezizomycotina;saccharomyceta;ascomycota;dikarya;fungi;opisthokonta;eukaryota;cellular organisms;root	/LUSTRE/HOME/uva_dpvrf_1/uva_dpvrf_1_3/annotation/entap_outfiles/similarity_search/DIAMOND/blastp_transcripts_fc072v_final_nr.out	No	No							117187.FVEG_03576T0	2.3e-39	166.8		Fungi	fuNOG[21]	04BP6@ascNOG,0KN73@euNOG,0Q946@fuNOG,0SM9R@hypNOG,10XRR@NOG,138AF@opiNOG,1A2GM@sordNOG
FC072V.10603.1	Complete	PCD43137.1	98.6	147	2	0	1	147	92	238	2e-76	100	PCD43137.1 hypothetical protein AU210_002239 [Fusarium oxysporum f. sp. radicis-cucumerinum]	fusarium oxysporum f. sp. radicis-cucumerinum	fusarium oxysporum f. sp. radicis-cucumerinum;fusarium oxysporum;fusarium oxysporum species complex;fusarium;nectriaceae;hypocreales;hypocreomycetidae;sordariomycetes;sordariomyceta;leotiomyceta;pezizomycotina;saccharomyceta;ascomycota;dikarya;fungi;opisthokonta;eukaryota;cellular organisms;root	/LUSTRE/HOME/uva_dpvrf_1/uva_dpvrf_1_3/annotation/entap_outfiles/similarity_search/DIAMOND/blastp_transcripts_fc072v_final_nr.out	No	No							117187.FVEG_03580T0	9.2e-78	294.7	FG04908.1	Fungi	fuNOG[21]	03Q69@ascNOG,0IKE2@euNOG,0PH2I@fuNOG,0SBHA@hypNOG,0WSWI@necNOG,11Z1E@NOG,13NVU@opiNOG,19PUW@sordNOG
FC072V.10598.1	Complete	KAF5660472.1	99.2	510	4	0	1	510	1	510	1.8e-286	100	KAF5660472.1 alpha-1,3-mannosyltransferase [Fusarium circinatum]	fusarium circinatum	fusarium circinatum;fusarium fujikuroi species complex;fusarium;nectriaceae;hypocreales;hypocreomycetidae;sordariomycetes;sordariomyceta;leotiomyceta;pezizomycotina;saccharomyceta;ascomycota;dikarya;fungi;opisthokonta;eukaryota;cellular organisms;root	/LUSTRE/HOME/uva_dpvrf_1/uva_dpvrf_1_3/annotation/entap_outfiles/similarity_search/DIAMOND/blastp_transcripts_fc072v_final_nr.out	No	Yes							5507.FOXG_05718P0	3.8e-272	942.2	FG04904.1	Fungi	fuNOG[21]	03P3K@ascNOG,0IHYQ@euNOG,0PIWJ@fuNOG,0SG6E@hypNOG,121U7@NOG,13I0Z@opiNOG,1A5HY@sordNOG	514	GO:0005975-carbohydrate metabolic process(L=3),GO:0006464-cellular protein modification process(L=5),GO:0006486-protein glycosylation(L=6),GO:0006493-protein O-linked glycosylation(L=7),GO:0008150-biological_process(L=0),GO:0008152-metabolic process(L=1),GO:0009058-biosynthetic process(L=2),GO:0009059-macromolecule biosynthetic process(L=4),GO:0009100-glycoprotein metabolic process(L=4),GO:000910…	GO:0000139-Golgi membrane(L=5),GO:0005575-cellular_component(L=0),GO:0005622-intracellular(L=3),GO:0005623-cell(L=1),GO:0005737-cytoplasm(L=4),GO:0005794-Golgi apparatus(L=4),GO:0012505-endomembrane system(L=3),GO:0016020-membrane(L=1),GO:0016021-integral component of membrane(L=4),GO:0031090-organelle membrane(L=3),GO:0031224-intrinsic component of membrane(L=3),GO:0043226-organelle(L=1),GO:0043…	GO:0000030-mannosyltransferase activity(L=5),GO:0000033-alpha-1,3-mannosyltransferase activity(L=6),GO:0003674-molecular_function(L=0),GO:0003824-catalytic activity(L=1),GO:0016740-transferase activity(L=2),GO:0016757-transferase activity, transferring glycosyl groups(L=3),GO:0016758-transferase activity, transferring hexosyl groups(L=4),	GO:0006486-protein glycosylation(L=6),		GO:0016757-transferase activity, transferring glycosyl groups(L=3),		IPR022751(Alpha-mannosyltransferase)	Pfam	PF11051(Mannosyltransferase putative)	3.2e-37
FC072V.10593.1	Partial 3 Prime	TID14335.1	73.3	90	24	0	23	112	28	117	2.9e-27	79.6	TID14335.1 Structural maintenance of chromosomes protein 6 [Venturia nashicola]	venturia nashicola	venturia nashicola;venturia;venturiaceae;venturiales;dothideomycetes incertae sedis;dothideomycetes;dothideomyceta;leotiomyceta;pezizomycotina;saccharomyceta;ascomycota;dikarya;fungi;opisthokonta;eukaryota;cellular organisms;root	/LUSTRE/HOME/uva_dpvrf_1/uva_dpvrf_1_3/annotation/entap_outfiles/similarity_search/DIAMOND/blastp_transcripts_fc072v_final_nr.out	No	Yes							5507.FOXG_05725P0	2.4e-54	216.5		Fungi	fuNOG[21]	03IYA@ascNOG,0PFT2@fuNOG,0SFCN@hypNOG,12QMW@opiNOG,1A4BM@sordNOG,COG0477@NOG,KOG2533@euNOG		GO:0006793-phosphorus metabolic process(L=3),GO:0006796-phosphate-containing compound metabolic process(L=4),GO:0006810-transport(L=3),GO:0008150-biological_process(L=0),GO:0008152-metabolic process(L=1),GO:0009987-cellular process(L=1),GO:0016311-dephosphorylation(L=5),GO:0044237-cellular metabolic process(L=2),GO:0044699-single-organism process(L=1),GO:0044763-single-organism cellular process(L…	GO:0005575-cellular_component(L=0),GO:0016020-membrane(L=1),GO:0016021-integral component of membrane(L=4),GO:0031224-intrinsic component of membrane(L=3),GO:0044425-membrane part(L=2),	GO:0003674-molecular_function(L=0),GO:0003824-catalytic activity(L=1),GO:0003993-acid phosphatase activity(L=6),GO:0016787-hydrolase activity(L=2),GO:0016788-hydrolase activity, acting on ester bonds(L=3),GO:0016791-phosphatase activity(L=5),GO:0042578-phosphoric ester hydrolase activity(L=4),
FC072V.10595.1	Complete	KAF5672409.1	100	260	0	0	1	260	1	260	3.7e-150	100	KAF5672409.1 FAD synthetase [Fusarium circinatum]	fusarium circinatum	fusarium circinatum;fusarium fujikuroi species complex;fusarium;nectriaceae;hypocreales;hypocreomycetidae;sordariomycetes;sordariomyceta;leotiomyceta;pezizomycotina;saccharomyceta;ascomycota;dikarya;fungi;opisthokonta;eukaryota;cellular organisms;root	/LUSTRE/HOME/uva_dpvrf_1/uva_dpvrf_1_3/annotation/entap_outfiles/similarity_search/DIAMOND/blastp_transcripts_fc072v_final_nr.out	No	Yes							5507.FOXG_04993P0	3.5e-149	532.7	FG10410.1	Fungi	fuNOG[21]	03P4G@ascNOG,0PK1V@fuNOG,0SAQ8@hypNOG,13JTA@opiNOG,19IMG@sordNOG,COG0175@NOG,KOG2644@euNOG	7401100	GO:0006139-nucleobase-containing compound metabolic process(L=3),GO:0006355-regulation of transcription, DNA-templated(L=7),GO:0006725-cellular aromatic compound metabolic process(L=3),GO:0006732-coenzyme metabolic process(L=4),GO:0006747-FAD biosynthetic process(L=7),GO:0006753-nucleoside phosphate metabolic process(L=4),GO:0006793-phosphorus metabolic process(L=3),GO:0006796-phosphate-containin…	GO:0005575-cellular_component(L=0),GO:0005622-intracellular(L=3),GO:0005623-cell(L=1),GO:0005737-cytoplasm(L=4),GO:0044424-intracellular part(L=3),GO:0044464-cell part(L=2),	GO:0000166-nucleotide binding(L=3),GO:0000287-magnesium ion binding(L=5),GO:0001071-nucleic acid binding transcription factor activity(L=1),GO:0001882-nucleoside binding(L=3),GO:0001883-purine nucleoside binding(L=4),GO:0003674-molecular_function(L=0),GO:0003700-transcription factor activity, sequence-specific DNA binding(L=2),GO:0003824-catalytic activity(L=1),GO:0003919-FMN adenylyltransferase …			GO:0003824-catalytic activity(L=1),	Reactome: R-HSA-196843	IPR002500(Phosphoadenosine phosphosulphate reductase)	Pfam	PF01507(Phosphoadenosine phosphosulfate reductase family)	1.3e-19
FC072V.10594.1	Internal	PNP80564.1	89.5	430	27	1	1	412	52	481	6.7e-215	100	PNP80564.1 hypothetical protein FNYG_06163 [Fusarium nygamai]	fusarium nygamai	fusarium nygamai;fusarium fujikuroi species complex;fusarium;nectriaceae;hypocreales;hypocreomycetidae;sordariomycetes;sordariomyceta;leotiomyceta;pezizomycotina;saccharomyceta;ascomycota;dikarya;fungi;opisthokonta;eukaryota;cellular organisms;root	/LUSTRE/HOME/uva_dpvrf_1/uva_dpvrf_1_3/annotation/entap_outfiles/similarity_search/DIAMOND/blastp_transcripts_fc072v_final_nr.out	No	No							117187.FVEG_03139T0	6.5e-198	695.3		Fungi	fuNOG[21]	04BV5@ascNOG,0KN2I@euNOG,0Q8YC@fuNOG,0SN3A@hypNOG,0WUP0@necNOG,10XW5@NOG,138GC@opiNOG,1A24V@sordNOG									IPR025676(Clr5 domain)	Pfam	PF14420(Clr5 domain)	2.5e-09
FC072V.10590.1	Complete	RBA21367.1	99.1	549	5	0	1	549	1	549	6.1e-304	100	RBA21367.1 endo-1,4-beta-xylanase [Fusarium proliferatum]	fusarium proliferatum	fusarium proliferatum;fusarium fujikuroi species complex;fusarium;nectriaceae;hypocreales;hypocreomycetidae;sordariomycetes;sordariomyceta;leotiomyceta;pezizomycotina;saccharomyceta;ascomycota;dikarya;fungi;opisthokonta;eukaryota;cellular organisms;root	/LUSTRE/HOME/uva_dpvrf_1/uva_dpvrf_1_3/annotation/entap_outfiles/similarity_search/DIAMOND/blastp_transcripts_fc072v_final_nr.out	No	Yes							5507.FOXG_04992P0	4.5e-303	1045	FG06445.1	Fungi	fuNOG[21]	03PE8@ascNOG,0IERE@euNOG,0PKIH@fuNOG,0SI19@hypNOG,13HD6@opiNOG,1A2U1@sordNOG,COG3693@NOG		GO:0000272-polysaccharide catabolic process(L=5),GO:0005975-carbohydrate metabolic process(L=3),GO:0005976-polysaccharide metabolic process(L=4),GO:0008150-biological_process(L=0),GO:0008152-metabolic process(L=1),GO:0009056-catabolic process(L=2),GO:0009057-macromolecule catabolic process(L=4),GO:0009251-glucan catabolic process(L=6),GO:0009987-cellular process(L=1),GO:0010383-cell wall polysacc…	GO:0005575-cellular_component(L=0),GO:0005576-extracellular region(L=1),GO:0005615-extracellular space(L=3),GO:0044421-extracellular region part(L=2),	GO:0001871-pattern binding(L=2),GO:0003674-molecular_function(L=0),GO:0003824-catalytic activity(L=1),GO:0004553-hydrolase activity, hydrolyzing O-glycosyl compounds(L=4),GO:0005488-binding(L=1),GO:0016162-cellulose 1,4-beta-cellobiosidase activity(L=5),GO:0016787-hydrolase activity(L=2),GO:0016798-hydrolase activity, acting on glycosyl bonds(L=3),GO:0030246-carbohydrate binding(L=2),GO:0030247-p…	GO:0005975-carbohydrate metabolic process(L=3),		GO:0004553-hydrolase activity, hydrolyzing O-glycosyl compounds(L=4),	MetaCyc: PWY-6717|MetaCyc: PWY-6784	IPR001000(Glycoside hydrolase family 10 domain)	Pfam	PF00331(Glycosyl hydrolase family 10)	1.2e-104
FC072V.10589.2	Complete	KAF5672412.1	99.8	655	0	1	1	654	1	655	0	100	KAF5672412.1 hypothetical protein FCIRC_8420 [Fusarium circinatum]	fusarium circinatum	fusarium circinatum;fusarium fujikuroi species complex;fusarium;nectriaceae;hypocreales;hypocreomycetidae;sordariomycetes;sordariomyceta;leotiomyceta;pezizomycotina;saccharomyceta;ascomycota;dikarya;fungi;opisthokonta;eukaryota;cellular organisms;root	/LUSTRE/HOME/uva_dpvrf_1/uva_dpvrf_1_3/annotation/entap_outfiles/similarity_search/DIAMOND/blastp_transcripts_fc072v_final_nr.out	No	No							117187.FVEG_03214T0	0	1248.4	FG10498.1	Fungi	fuNOG[21]	03MIT@ascNOG,0IG7S@euNOG,0PJJS@fuNOG,0SCJA@hypNOG,0WXGU@necNOG,0XR11@NOG,12Q6C@opiNOG,19M89@sordNOG									IPR021709(Protein of unknown function DUF3292)	Pfam	PF11696(Protein of unknown function (DUF3292))	1.1e-275
FC072V.10588.1	Complete	KAF5672413.1	99.7	305	1	0	1	305	1	305	3.4e-179	100	KAF5672413.1 metallo beta lactamase [Fusarium circinatum]	fusarium circinatum	fusarium circinatum;fusarium fujikuroi species complex;fusarium;nectriaceae;hypocreales;hypocreomycetidae;sordariomycetes;sordariomyceta;leotiomyceta;pezizomycotina;saccharomyceta;ascomycota;dikarya;fungi;opisthokonta;eukaryota;cellular organisms;root	/LUSTRE/HOME/uva_dpvrf_1/uva_dpvrf_1_3/annotation/entap_outfiles/similarity_search/DIAMOND/blastp_transcripts_fc072v_final_nr.out	No	Yes							117187.FVEG_03213T0	2.8e-177	626.3	FG10497.1	Fungi	fuNOG[21]	03Q2R@ascNOG,0IWKQ@euNOG,0PJGS@fuNOG,0SI0A@hypNOG,0WYTD@necNOG,0XQVW@NOG,13N3D@opiNOG,19PFC@sordNOG		GO:0008150-biological_process(L=0),GO:0008152-metabolic process(L=1),		GO:0003674-molecular_function(L=0),GO:0003824-catalytic activity(L=1),GO:0016787-hydrolase activity(L=2),
FC072V.10586.1	Complete	KAF5672416.1	99.6	274	1	0	1	274	162	435	4.1e-160	100	KAF5672416.1 conidial development fluffy [Fusarium circinatum]	fusarium circinatum	fusarium circinatum;fusarium fujikuroi species complex;fusarium;nectriaceae;hypocreales;hypocreomycetidae;sordariomycetes;sordariomyceta;leotiomyceta;pezizomycotina;saccharomyceta;ascomycota;dikarya;fungi;opisthokonta;eukaryota;cellular organisms;root	/LUSTRE/HOME/uva_dpvrf_1/uva_dpvrf_1_3/annotation/entap_outfiles/similarity_search/DIAMOND/blastp_transcripts_fc072v_final_nr.out	No	Yes							5507.FOXG_04931P0	6.3e-157	558.5		Fungi	fuNOG[21]	040GG@ascNOG,0JGXT@euNOG,0PY62@fuNOG,0SI49@hypNOG,0YZ9D@NOG,14977@opiNOG,1A31R@sordNOG		GO:0006139-nucleobase-containing compound metabolic process(L=3),GO:0006351-transcription, DNA-templated(L=5),GO:0006355-regulation of transcription, DNA-templated(L=7),GO:0006357-regulation of transcription from RNA polymerase II promoter(L=8),GO:0006366-transcription from RNA polymerase II promoter(L=6),GO:0006725-cellular aromatic compound metabolic process(L=3),GO:0006807-nitrogen compound me…	GO:0005575-cellular_component(L=0),GO:0005622-intracellular(L=3),GO:0005623-cell(L=1),GO:0005634-nucleus(L=5),GO:0043226-organelle(L=1),GO:0043227-membrane-bounded organelle(L=2),GO:0043229-intracellular organelle(L=3),GO:0043231-intracellular membrane-bounded organelle(L=4),GO:0044424-intracellular part(L=3),GO:0044464-cell part(L=2),	GO:0000981-RNA polymerase II transcription factor activity, sequence-specific DNA binding(L=3),GO:0001071-nucleic acid binding transcription factor activity(L=1),GO:0003674-molecular_function(L=0),GO:0003700-transcription factor activity, sequence-specific DNA binding(L=2),GO:0005488-binding(L=1),GO:0008270-zinc ion binding(L=6),GO:0043167-ion binding(L=2),GO:0043169-cation binding(L=3),GO:004687…					IPR021833(Protein of unknown function DUF3425)	Pfam	PF11905(Domain of unknown function (DUF3425))	1.1e-13
FC072V.10584.1
FC072V.10585.2	Internal	KAF5672418.1	99.2	250	2	0	1	250	21	270	9.9e-145	100	KAF5672418.1 hypothetical protein FCIRC_8426 [Fusarium circinatum]	fusarium circinatum	fusarium circinatum;fusarium fujikuroi species complex;fusarium;nectriaceae;hypocreales;hypocreomycetidae;sordariomycetes;sordariomyceta;leotiomyceta;pezizomycotina;saccharomyceta;ascomycota;dikarya;fungi;opisthokonta;eukaryota;cellular organisms;root	/LUSTRE/HOME/uva_dpvrf_1/uva_dpvrf_1_3/annotation/entap_outfiles/similarity_search/DIAMOND/blastp_transcripts_fc072v_final_nr.out	No	No							5518.FGSG_10490P0	1.1e-91	341.7	FG10490.1	Fungi	fuNOG[21]	03QZ2@ascNOG,0IWPV@euNOG,0PMYD@fuNOG,0SK8P@hypNOG,0WZI5@necNOG,11HQG@NOG,13QR7@opiNOG,19R5M@sordNOG		GO:0006807-nitrogen compound metabolic process(L=2),GO:0006810-transport(L=3),GO:0006811-ion transport(L=4),GO:0006812-cation transport(L=5),GO:0008150-biological_process(L=0),GO:0008152-metabolic process(L=1),GO:0009058-biosynthetic process(L=2),GO:0009987-cellular process(L=1),GO:0030001-metal ion transport(L=6),GO:0034220-ion transmembrane transport(L=5),GO:0034641-cellular nitrogen compound m…	GO:0005575-cellular_component(L=0),GO:0016020-membrane(L=1),	GO:0003674-molecular_function(L=0),GO:0005215-transporter activity(L=1),GO:0008324-cation transmembrane transporter activity(L=5),GO:0015075-ion transmembrane transporter activity(L=4),GO:0022857-transmembrane transporter activity(L=2),GO:0022891-substrate-specific transmembrane transporter activity(L=3),GO:0022892-substrate-specific transporter activity(L=2),GO:0046873-metal ion transmembrane tr…
FC072V.10581.2	Partial 3 Prime	KAF5967857.1	99.7	330	1	0	1	330	95	424	1e-189	100	KAF5967857.1 4-hydroxyphenylpyruvate dioxygenase [Fusarium bulbicola]	fusarium bulbicola	fusarium bulbicola;fusarium fujikuroi species complex;fusarium;nectriaceae;hypocreales;hypocreomycetidae;sordariomycetes;sordariomyceta;leotiomyceta;pezizomycotina;saccharomyceta;ascomycota;dikarya;fungi;opisthokonta;eukaryota;cellular organisms;root	/LUSTRE/HOME/uva_dpvrf_1/uva_dpvrf_1_3/annotation/entap_outfiles/similarity_search/DIAMOND/blastp_transcripts_fc072v_final_nr.out	No	Yes							5507.FOXG_07706P0	3.6e-191	672.5	TCRP	Fungi	fuNOG[21]	03PHP@ascNOG,0PJ65@fuNOG,0SCCA@hypNOG,12P5H@opiNOG,19QGB@sordNOG,COG3185@NOG,KOG0638@euNOG	1303503601100	GO:0006082-organic acid metabolic process(L=3),GO:0006520-cellular amino acid metabolic process(L=3),GO:0006558-L-phenylalanine metabolic process(L=5),GO:0006559-L-phenylalanine catabolic process(L=6),GO:0006570-tyrosine metabolic process(L=5),GO:0006572-tyrosine catabolic process(L=6),GO:0006725-cellular aromatic compound metabolic process(L=3),GO:0006807-nitrogen compound metabolic process(L=2)…		GO:0003674-molecular_function(L=0),GO:0003824-catalytic activity(L=1),GO:0003868-4-hydroxyphenylpyruvate dioxygenase activity(L=5),GO:0005488-binding(L=1),GO:0016491-oxidoreductase activity(L=2),GO:0016701-oxidoreductase activity, acting on single donors with incorporation of molecular oxygen(L=3),GO:0016702-oxidoreductase activity, acting on single donors with incorporation of molecular oxygen, …					IPR004360(Glyoxalase/fosfomycin resistance/dioxygenase domain)	Pfam	PF00903(Glyoxalase/Bleomycin resistance protein/Dioxygenase superfamily)	3.6e-15
FC072V.10579.1	Complete	KAF5533084.1	99.8	405	1	0	1	405	1	405	1.5e-219	100	KAF5533084.1 triose phosphate 3-phosphoglycerate phosphate translocator [Fusarium mexicanum]	fusarium mexicanum	fusarium mexicanum;fusarium fujikuroi species complex;fusarium;nectriaceae;hypocreales;hypocreomycetidae;sordariomycetes;sordariomyceta;leotiomyceta;pezizomycotina;saccharomyceta;ascomycota;dikarya;fungi;opisthokonta;eukaryota;cellular organisms;root	/LUSTRE/HOME/uva_dpvrf_1/uva_dpvrf_1_3/annotation/entap_outfiles/similarity_search/DIAMOND/blastp_transcripts_fc072v_final_nr.out	No	Yes							5507.FOXG_07703P0	3.5e-220	769.2	FG05998.1	Fungi	fuNOG[21]	03IQQ@ascNOG,0PGHJ@fuNOG,0SAMT@hypNOG,0XP1S@NOG,13JR9@opiNOG,19NW2@sordNOG,KOG1441@euNOG		GO:0000003-reproduction(L=1),GO:0003006-developmental process involved in reproduction(L=2),GO:0006810-transport(L=3),GO:0007275-multicellular organism development(L=3),GO:0008150-biological_process(L=0),GO:0008643-carbohydrate transport(L=4),GO:0009653-anatomical structure morphogenesis(L=3),GO:0009987-cellular process(L=1),GO:0016043-cellular component organization(L=2),GO:0019954-asexual repro…	GO:0005575-cellular_component(L=0),GO:0016020-membrane(L=1),GO:0016021-integral component of membrane(L=4),GO:0031224-intrinsic component of membrane(L=3),GO:0044425-membrane part(L=2),						IPR004853(Sugar phosphate transporter domain)	Pfam	PF03151(Triose-phosphate Transporter family)	4.4e-24
FC072V.10705.1
FC072V.10577.1
FC072V.10576.1
FC072V.10571.1	Partial 5 Prime	KAF5658120.1	100	311	0	0	1	311	212	522	5e-178	100	KAF5658120.1 hypothetical protein FCIRC_13005 [Fusarium circinatum]	fusarium circinatum	fusarium circinatum;fusarium fujikuroi species complex;fusarium;nectriaceae;hypocreales;hypocreomycetidae;sordariomycetes;sordariomyceta;leotiomyceta;pezizomycotina;saccharomyceta;ascomycota;dikarya;fungi;opisthokonta;eukaryota;cellular organisms;root	/LUSTRE/HOME/uva_dpvrf_1/uva_dpvrf_1_3/annotation/entap_outfiles/similarity_search/DIAMOND/blastp_transcripts_fc072v_final_nr.out	No	No							140110.NechaP86995	1.4e-11	75.9		Fungi	fuNOG[21]	04BBF@ascNOG,0KNG4@euNOG,0Q9FK@fuNOG,0SMHR@hypNOG,10XH9@NOG,137ZA@opiNOG,1A36T@sordNOG
FC072V.10568.1	Partial 3 Prime	KAF5602592.1	94.8	648	9	1	1	648	1	623	0	100	KAF5602592.1 WD repeat [Fusarium subglutinans]	fusarium subglutinans	fusarium subglutinans;fusarium fujikuroi species complex;fusarium;nectriaceae;hypocreales;hypocreomycetidae;sordariomycetes;sordariomyceta;leotiomyceta;pezizomycotina;saccharomyceta;ascomycota;dikarya;fungi;opisthokonta;eukaryota;cellular organisms;root	/LUSTRE/HOME/uva_dpvrf_1/uva_dpvrf_1_3/annotation/entap_outfiles/similarity_search/DIAMOND/blastp_transcripts_fc072v_final_nr.out	No	Yes							117187.FVEG_02469T0	0	1172.9	FG08872.1	Fungi	fuNOG[21]	04DKR@ascNOG,0IQ14@euNOG,0QDP4@fuNOG,0SNUS@hypNOG,0X1P0@necNOG,0XP4W@NOG,13CYI@opiNOG,1A76B@sordNOG							GO:0005515-protein binding(L=2),		IPR001680(WD40 repeat)	Pfam	PF00400(WD domain, G-beta repeat)	1.3e-05
FC072V.10564.1	Complete	CVK90263.1	99.8	574	1	0	1	574	1	574	0	100	CVK90263.1 probable sulfate adenylyltransferase [Fusarium mangiferae]	fusarium mangiferae	fusarium mangiferae;fusarium fujikuroi species complex;fusarium;nectriaceae;hypocreales;hypocreomycetidae;sordariomycetes;sordariomyceta;leotiomyceta;pezizomycotina;saccharomyceta;ascomycota;dikarya;fungi;opisthokonta;eukaryota;cellular organisms;root	/LUSTRE/HOME/uva_dpvrf_1/uva_dpvrf_1_3/annotation/entap_outfiles/similarity_search/DIAMOND/blastp_transcripts_fc072v_final_nr.out	No	Yes							117187.FVEG_02472T0	0	1143.6	MET3	Fungi	fuNOG[21]	03IVM@ascNOG,0PFXE@fuNOG,0SCHM@hypNOG,0WXP5@necNOG,12PKF@opiNOG,19MWV@sordNOG,COG2046@NOG,KOG0636@euNOG	2.30451e+16	GO:0000096-sulfur amino acid metabolic process(L=4),GO:0000097-sulfur amino acid biosynthetic process(L=5),GO:0000103-sulfate assimilation(L=4),GO:0006082-organic acid metabolic process(L=3),GO:0006520-cellular amino acid metabolic process(L=3),GO:0006534-cysteine metabolic process(L=5),GO:0006555-methionine metabolic process(L=5),GO:0006790-sulfur compound metabolic process(L=3),GO:0006793-phosp…	GO:0005575-cellular_component(L=0),GO:0005622-intracellular(L=3),GO:0005623-cell(L=1),GO:0005737-cytoplasm(L=4),GO:0005739-mitochondrion(L=5),GO:0005829-cytosol(L=4),GO:0043226-organelle(L=1),GO:0043227-membrane-bounded organelle(L=2),GO:0043229-intracellular organelle(L=3),GO:0043231-intracellular membrane-bounded organelle(L=4),GO:0044424-intracellular part(L=3),GO:0044444-cytoplasmic part(L=4)…	GO:0000166-nucleotide binding(L=3),GO:0001882-nucleoside binding(L=3),GO:0001883-purine nucleoside binding(L=4),GO:0003674-molecular_function(L=0),GO:0003824-catalytic activity(L=1),GO:0004020-adenylylsulfate kinase activity(L=5),GO:0004779-sulfate adenylyltransferase activity(L=6),GO:0004781-sulfate adenylyltransferase (ATP) activity(L=7),GO:0005488-binding(L=1),GO:0005524-ATP binding(L=7),GO:00…			GO:0004781-sulfate adenylyltransferase (ATP) activity(L=7),	KEGG: 00230+2.7.7.4|KEGG: 00261+2.7.7.4|KEGG: 00450+2.7.7.4|KEGG: 00920+2.7.7.4|MetaCyc: PWY-5278|MetaCyc: PWY-5340|MetaCyc: PWY-6683|MetaCyc: PWY-6932|Reactome: R-HSA-174362|Reactome: R-HSA-2408550	IPR024951(Sulphate adenylyltransferase catalytic domain)	Pfam	PF01747(ATP-sulfurylase)	2.9e-85
FC072V.10560.1	Complete	KAF5687690.1	99.9	935	1	0	1	935	1	935	0	100	KAF5687690.1 calcium related spray [Fusarium circinatum]	fusarium circinatum	fusarium circinatum;fusarium fujikuroi species complex;fusarium;nectriaceae;hypocreales;hypocreomycetidae;sordariomycetes;sordariomyceta;leotiomyceta;pezizomycotina;saccharomyceta;ascomycota;dikarya;fungi;opisthokonta;eukaryota;cellular organisms;root	/LUSTRE/HOME/uva_dpvrf_1/uva_dpvrf_1_3/annotation/entap_outfiles/similarity_search/DIAMOND/blastp_transcripts_fc072v_final_nr.out	No	Yes							117187.FVEG_02474T0	0	1771.1	FG08876.1	Fungi	fuNOG[21]	03IPZ@ascNOG,0IPF4@euNOG,0PK86@fuNOG,0SDHP@hypNOG,0WVQU@necNOG,11AHM@NOG,13JZS@opiNOG,19KR2@sordNOG		GO:0006810-transport(L=3),GO:0008150-biological_process(L=0),GO:0009987-cellular process(L=1),GO:0044699-single-organism process(L=1),GO:0044763-single-organism cellular process(L=2),GO:0044765-single-organism transport(L=3),GO:0051179-localization(L=1),GO:0051234-establishment of localization(L=2),GO:0055085-transmembrane transport(L=4),	GO:0005575-cellular_component(L=0),GO:0005623-cell(L=1),GO:0005886-plasma membrane(L=3),GO:0016020-membrane(L=1),GO:0016021-integral component of membrane(L=4),GO:0031224-intrinsic component of membrane(L=3),GO:0044425-membrane part(L=2),GO:0044464-cell part(L=2),GO:0071944-cell periphery(L=3),	GO:0003674-molecular_function(L=0),GO:0005215-transporter activity(L=1),GO:0022857-transmembrane transporter activity(L=2),					IPR010308(TRP, C-terminal)	Pfam	PF06011(Transient receptor potential (TRP) ion channel)	5.6e-108
FC072V.10559.1	Complete	KAF5687693.1	100	169	0	0	1	169	1	169	7.8e-93	100	KAF5687693.1 hypothetical protein FCIRC_2225 [Fusarium circinatum]	fusarium circinatum	fusarium circinatum;fusarium fujikuroi species complex;fusarium;nectriaceae;hypocreales;hypocreomycetidae;sordariomycetes;sordariomyceta;leotiomyceta;pezizomycotina;saccharomyceta;ascomycota;dikarya;fungi;opisthokonta;eukaryota;cellular organisms;root	/LUSTRE/HOME/uva_dpvrf_1/uva_dpvrf_1_3/annotation/entap_outfiles/similarity_search/DIAMOND/blastp_transcripts_fc072v_final_nr.out	No	No							117187.FVEG_02476T0	1.9e-90	337	FG08878.1	Fungi	fuNOG[21]	04B43@ascNOG,0KNMA@euNOG,0Q9NJ@fuNOG,0SCXE@hypNOG,0X12T@necNOG,10XCC@NOG,137S6@opiNOG,1A3MU@sordNOG
FC072V.10562.2	Complete	KPA37005.1	98.2	114	2	0	1	114	1	114	7.4e-55	100	KPA37005.1 eukaryotic translation initiation factor eif-1 [Fusarium langsethiae]	fusarium langsethiae	fusarium langsethiae;fusarium sambucinum species complex;fusarium;nectriaceae;hypocreales;hypocreomycetidae;sordariomycetes;sordariomyceta;leotiomyceta;pezizomycotina;saccharomyceta;ascomycota;dikarya;fungi;opisthokonta;eukaryota;cellular organisms;root	/LUSTRE/HOME/uva_dpvrf_1/uva_dpvrf_1_3/annotation/entap_outfiles/similarity_search/DIAMOND/blastp_transcripts_fc072v_final_nr.out	No	Yes							117187.FVEG_02478T0	6.9e-57	224.9	SUI1	Fungi	fuNOG[21]	03SE6@ascNOG,0PNPS@fuNOG,0SK9W@hypNOG,0X0C4@necNOG,13S0X@opiNOG,19S3V@sordNOG,COG0023@NOG,KOG1770@euNOG	3013	GO:0002181-cytoplasmic translation(L=7),GO:0002183-cytoplasmic translational initiation(L=8),GO:0006412-translation(L=5),GO:0006413-translational initiation(L=6),GO:0006417-regulation of translation(L=7),GO:0008150-biological_process(L=0),GO:0008152-metabolic process(L=1),GO:0009058-biosynthetic process(L=2),GO:0009059-macromolecule biosynthetic process(L=4),GO:0009889-regulation of biosynthetic …	GO:0005575-cellular_component(L=0),GO:0005622-intracellular(L=3),GO:0005623-cell(L=1),GO:0005634-nucleus(L=5),GO:0005737-cytoplasm(L=4),GO:0005829-cytosol(L=4),GO:0030529-intracellular ribonucleoprotein complex(L=4),GO:0032991-macromolecular complex(L=1),GO:0043226-organelle(L=1),GO:0043227-membrane-bounded organelle(L=2),GO:0043229-intracellular organelle(L=3),GO:0043231-intracellular membrane-b…	GO:0003674-molecular_function(L=0),GO:0003676-nucleic acid binding(L=3),GO:0003723-RNA binding(L=4),GO:0003743-translation initiation factor activity(L=6),GO:0005488-binding(L=1),GO:0005515-protein binding(L=2),GO:0008135-translation factor activity, RNA binding(L=5),GO:0031369-translation initiation factor binding(L=3),GO:0097159-organic cyclic compound binding(L=2),GO:1901363-heterocyclic compo…	GO:0006413-translational initiation(L=6),		GO:0003743-translation initiation factor activity(L=6),		IPR001950(SUI1 domain)	Pfam	PF01253(Translation initiation factor SUI1)	4.5e-28
FC072V.10562.1	Complete	KPA37005.1	98.2	114	2	0	1	114	1	114	7.4e-55	100	KPA37005.1 eukaryotic translation initiation factor eif-1 [Fusarium langsethiae]	fusarium langsethiae	fusarium langsethiae;fusarium sambucinum species complex;fusarium;nectriaceae;hypocreales;hypocreomycetidae;sordariomycetes;sordariomyceta;leotiomyceta;pezizomycotina;saccharomyceta;ascomycota;dikarya;fungi;opisthokonta;eukaryota;cellular organisms;root	/LUSTRE/HOME/uva_dpvrf_1/uva_dpvrf_1_3/annotation/entap_outfiles/similarity_search/DIAMOND/blastp_transcripts_fc072v_final_nr.out	No	Yes							117187.FVEG_02478T0	6.9e-57	224.9	SUI1	Fungi	fuNOG[21]	03SE6@ascNOG,0PNPS@fuNOG,0SK9W@hypNOG,0X0C4@necNOG,13S0X@opiNOG,19S3V@sordNOG,COG0023@NOG,KOG1770@euNOG	3013	GO:0002181-cytoplasmic translation(L=7),GO:0002183-cytoplasmic translational initiation(L=8),GO:0006412-translation(L=5),GO:0006413-translational initiation(L=6),GO:0006417-regulation of translation(L=7),GO:0008150-biological_process(L=0),GO:0008152-metabolic process(L=1),GO:0009058-biosynthetic process(L=2),GO:0009059-macromolecule biosynthetic process(L=4),GO:0009889-regulation of biosynthetic …	GO:0005575-cellular_component(L=0),GO:0005622-intracellular(L=3),GO:0005623-cell(L=1),GO:0005634-nucleus(L=5),GO:0005737-cytoplasm(L=4),GO:0005829-cytosol(L=4),GO:0030529-intracellular ribonucleoprotein complex(L=4),GO:0032991-macromolecular complex(L=1),GO:0043226-organelle(L=1),GO:0043227-membrane-bounded organelle(L=2),GO:0043229-intracellular organelle(L=3),GO:0043231-intracellular membrane-b…	GO:0003674-molecular_function(L=0),GO:0003676-nucleic acid binding(L=3),GO:0003723-RNA binding(L=4),GO:0003743-translation initiation factor activity(L=6),GO:0005488-binding(L=1),GO:0005515-protein binding(L=2),GO:0008135-translation factor activity, RNA binding(L=5),GO:0031369-translation initiation factor binding(L=3),GO:0097159-organic cyclic compound binding(L=2),GO:1901363-heterocyclic compo…	GO:0006413-translational initiation(L=6),		GO:0003743-translation initiation factor activity(L=6),		IPR001950(SUI1 domain)	Pfam	PF01253(Translation initiation factor SUI1)	4.5e-28
FC072V.10556.1	Partial 3 Prime	KAF5687696.1	99.3	434	1	1	1	432	1	434	1.8e-247	100	KAF5687696.1 hypothetical protein FCIRC_2228 [Fusarium circinatum]	fusarium circinatum	fusarium circinatum;fusarium fujikuroi species complex;fusarium;nectriaceae;hypocreales;hypocreomycetidae;sordariomycetes;sordariomyceta;leotiomyceta;pezizomycotina;saccharomyceta;ascomycota;dikarya;fungi;opisthokonta;eukaryota;cellular organisms;root	/LUSTRE/HOME/uva_dpvrf_1/uva_dpvrf_1_3/annotation/entap_outfiles/similarity_search/DIAMOND/blastp_transcripts_fc072v_final_nr.out	No	No							117187.FVEG_02480T0	2e-221	773.5	FG08882.1	Fungi	fuNOG[21]	04DF2@ascNOG,0KMW0@euNOG,0Q8PU@fuNOG,0SDKC@hypNOG,0WYUN@necNOG,11DTR@NOG,13E3P@opiNOG,1A2WP@sordNOG
FC072V.10555.1
FC072V.10554.1	Complete	KAF5687700.1	100	263	0	0	1	263	1	263	1.8e-149	100	KAF5687700.1 complex I intermediate-associated CIA30 precursor mitochondrial [Fusarium circinatum]	fusarium circinatum	fusarium circinatum;fusarium fujikuroi species complex;fusarium;nectriaceae;hypocreales;hypocreomycetidae;sordariomycetes;sordariomyceta;leotiomyceta;pezizomycotina;saccharomyceta;ascomycota;dikarya;fungi;opisthokonta;eukaryota;cellular organisms;root	/LUSTRE/HOME/uva_dpvrf_1/uva_dpvrf_1_3/annotation/entap_outfiles/similarity_search/DIAMOND/blastp_transcripts_fc072v_final_nr.out	No	Yes							140110.NechaP103861	7e-121	438.7	FG08886.1	Fungi	fuNOG[21]	03Q9S@ascNOG,0PGSM@fuNOG,0SDX7@hypNOG,0WXQB@necNOG,0XQPB@NOG,12PV5@opiNOG,19NJI@sordNOG,KOG2435@euNOG		GO:0006091-generation of precursor metabolites and energy(L=3),GO:0006119-oxidative phosphorylation(L=4),GO:0006120-mitochondrial electron transport, NADH to ubiquinone(L=8),GO:0006461-protein complex assembly(L=5),GO:0006793-phosphorus metabolic process(L=3),GO:0006796-phosphate-containing compound metabolic process(L=4),GO:0008150-biological_process(L=0),GO:0008152-metabolic process(L=1),GO:000…	GO:0005575-cellular_component(L=0),GO:0005622-intracellular(L=3),GO:0005623-cell(L=1),GO:0005737-cytoplasm(L=4),GO:0005739-mitochondrion(L=5),GO:0005740-mitochondrial envelope(L=6),GO:0005743-mitochondrial inner membrane(L=5),GO:0005746-mitochondrial respiratory chain(L=5),GO:0005747-mitochondrial respiratory chain complex I(L=5),GO:0016020-membrane(L=1),GO:0019866-organelle inner membrane(L=4),G…	GO:0003674-molecular_function(L=0),GO:0005488-binding(L=1),GO:0005515-protein binding(L=2),GO:0051082-unfolded protein binding(L=3),				Reactome: R-HSA-6799198	IPR013857(NADH:ubiquinone oxidoreductase intermediate-associated protein 30)	Pfam	PF08547(Complex I intermediate-associated protein 30 (CIA30))	5e-47
FC072V.10553.1	Internal	TQS32412.1	69.4	252	60	3	1	235	213	464	8.8e-90	97.1	TQS32412.1 hypothetical protein Golomagni_07270, partial [Golovinomyces magnicellulatus]	golovinomyces magnicellulatus	golovinomyces magnicellulatus;golovinomyces;erysiphaceae;erysiphales;leotiomycetes;sordariomyceta;leotiomyceta;pezizomycotina;saccharomyceta;ascomycota;dikarya;fungi;opisthokonta;eukaryota;cellular organisms;root	/LUSTRE/HOME/uva_dpvrf_1/uva_dpvrf_1_3/annotation/entap_outfiles/similarity_search/DIAMOND/blastp_transcripts_fc072v_final_nr.out	No	No							5507.FOXG_03612P0	6e-135	485.3	APC5	Fungi	fuNOG[21]	03MVM@ascNOG,0PHQY@fuNOG,0SA10@hypNOG,0YVZN@NOG,12QGQ@opiNOG,19JAD@sordNOG,KOG4322@euNOG	4.11041e+27	GO:0000278-mitotic cell cycle(L=4),GO:0000280-nuclear division(L=5),GO:0006139-nucleobase-containing compound metabolic process(L=3),GO:0006259-DNA metabolic process(L=4),GO:0006323-DNA packaging(L=6),GO:0006325-chromatin organization(L=4),GO:0006333-chromatin assembly or disassembly(L=5),GO:0006464-cellular protein modification process(L=5),GO:0006508-proteolysis(L=4),GO:0006511-ubiquitin-depend…	GO:0000151-ubiquitin ligase complex(L=4),GO:0000152-nuclear ubiquitin ligase complex(L=5),GO:0005575-cellular_component(L=0),GO:0005622-intracellular(L=3),GO:0005623-cell(L=1),GO:0005634-nucleus(L=5),GO:0005680-anaphase-promoting complex(L=7),GO:0031461-cullin-RING ubiquitin ligase complex(L=5),GO:0032991-macromolecular complex(L=1),GO:0043226-organelle(L=1),GO:0043227-membrane-bounded organelle(…					Reactome: R-HSA-141430|Reactome: R-HSA-174048|Reactome: R-HSA-174084|Reactome: R-HSA-174154|Reactome: R-HSA-174178|Reactome: R-HSA-174184|Reactome: R-HSA-176407|Reactome: R-HSA-176408|Reactome: R-HSA-176409|Reactome: R-HSA-176412|Reactome: R-HSA-179409|Reactome: R-HSA-2467813|Reactome: R-HSA-2559582|Reactome: R-HSA-69017|Reactome: R-HSA-8853884|Reactome: R-HSA-983168	IPR026000(Anaphase-promoting complex subunit 5 domain)	Pfam	PF12862(Anaphase-promoting complex subunit 5)	1.2e-34
FC072V.10551.2	Complete	RBQ66564.1	94.7	133	7	0	1	133	1	133	4.7e-69	100	RBQ66564.1 hypothetical protein FVER14953_02487 [Fusarium verticillioides]	fusarium verticillioides	fusarium verticillioides;fusarium fujikuroi species complex;fusarium;nectriaceae;hypocreales;hypocreomycetidae;sordariomycetes;sordariomyceta;leotiomyceta;pezizomycotina;saccharomyceta;ascomycota;dikarya;fungi;opisthokonta;eukaryota;cellular organisms;root	/LUSTRE/HOME/uva_dpvrf_1/uva_dpvrf_1_3/annotation/entap_outfiles/similarity_search/DIAMOND/blastp_transcripts_fc072v_final_nr.out	No	No							5507.FOXG_03613P0	2.5e-58	229.9	COX13	Fungi	fuNOG[21]	03SWG@ascNOG,0PNPT@fuNOG,0SJVG@hypNOG,1253X@NOG,13UWI@opiNOG,19S1H@sordNOG,KOG3469@euNOG	1.9011e+22	GO:0006091-generation of precursor metabolites and energy(L=3),GO:0006461-protein complex assembly(L=5),GO:0006810-transport(L=3),GO:0006811-ion transport(L=4),GO:0006812-cation transport(L=5),GO:0006818-hydrogen transport(L=4),GO:0006996-organelle organization(L=3),GO:0007005-mitochondrion organization(L=4),GO:0007275-multicellular organism development(L=3),GO:0008150-biological_process(L=0),GO:…	GO:0005575-cellular_component(L=0),GO:0005622-intracellular(L=3),GO:0005623-cell(L=1),GO:0005737-cytoplasm(L=4),GO:0005739-mitochondrion(L=5),GO:0005740-mitochondrial envelope(L=6),GO:0005743-mitochondrial inner membrane(L=5),GO:0005746-mitochondrial respiratory chain(L=5),GO:0005751-mitochondrial respiratory chain complex IV(L=5),GO:0016020-membrane(L=1),GO:0016021-integral component of membrane…	GO:0003674-molecular_function(L=0),GO:0003824-catalytic activity(L=1),GO:0004129-cytochrome-c oxidase activity(L=2),GO:0005215-transporter activity(L=1),GO:0008324-cation transmembrane transporter activity(L=5),GO:0015002-heme-copper terminal oxidase activity(L=3),GO:0015075-ion transmembrane transporter activity(L=4),GO:0015077-monovalent inorganic cation transmembrane transporter activity(L=7),…		GO:0005743-mitochondrial inner membrane(L=5),GO:0005751-mitochondrial respiratory chain complex IV(L=5),	GO:0004129-cytochrome-c oxidase activity(L=2),		IPR001349(Cytochrome c oxidase, subunit VIa)	Pfam	PF02046(Cytochrome c oxidase subunit VIa)	1.3e-41
FC072V.10551.1	Complete	KAF5562027.1	97.3	113	3	0	1	113	1	113	3.2e-58	100	KAF5562027.1 cytochrome c oxidase subunit 6a [Fusarium phyllophilum]	fusarium phyllophilum	fusarium phyllophilum;fusarium fujikuroi species complex;fusarium;nectriaceae;hypocreales;hypocreomycetidae;sordariomycetes;sordariomyceta;leotiomyceta;pezizomycotina;saccharomyceta;ascomycota;dikarya;fungi;opisthokonta;eukaryota;cellular organisms;root	/LUSTRE/HOME/uva_dpvrf_1/uva_dpvrf_1_3/annotation/entap_outfiles/similarity_search/DIAMOND/blastp_transcripts_fc072v_final_nr.out	No	Yes							5507.FOXG_03613P0	7.3e-59	231.5	COX13	Fungi	fuNOG[21]	03SWG@ascNOG,0PNPT@fuNOG,0SJVG@hypNOG,1253X@NOG,13UWI@opiNOG,19S1H@sordNOG,KOG3469@euNOG	1.9011e+22	GO:0006091-generation of precursor metabolites and energy(L=3),GO:0006461-protein complex assembly(L=5),GO:0006810-transport(L=3),GO:0006811-ion transport(L=4),GO:0006812-cation transport(L=5),GO:0006818-hydrogen transport(L=4),GO:0006996-organelle organization(L=3),GO:0007005-mitochondrion organization(L=4),GO:0007275-multicellular organism development(L=3),GO:0008150-biological_process(L=0),GO:…	GO:0005575-cellular_component(L=0),GO:0005622-intracellular(L=3),GO:0005623-cell(L=1),GO:0005737-cytoplasm(L=4),GO:0005739-mitochondrion(L=5),GO:0005740-mitochondrial envelope(L=6),GO:0005743-mitochondrial inner membrane(L=5),GO:0005746-mitochondrial respiratory chain(L=5),GO:0005751-mitochondrial respiratory chain complex IV(L=5),GO:0016020-membrane(L=1),GO:0016021-integral component of membrane…	GO:0003674-molecular_function(L=0),GO:0003824-catalytic activity(L=1),GO:0004129-cytochrome-c oxidase activity(L=2),GO:0005215-transporter activity(L=1),GO:0008324-cation transmembrane transporter activity(L=5),GO:0015002-heme-copper terminal oxidase activity(L=3),GO:0015075-ion transmembrane transporter activity(L=4),GO:0015077-monovalent inorganic cation transmembrane transporter activity(L=7),…		GO:0005743-mitochondrial inner membrane(L=5),GO:0005751-mitochondrial respiratory chain complex IV(L=5),	GO:0004129-cytochrome-c oxidase activity(L=2),		IPR001349(Cytochrome c oxidase, subunit VIa)	Pfam	PF02046(Cytochrome c oxidase subunit VIa)	3.9e-43
FC072V.10550.1
FC072V.10549.1	Internal	AHW83317.1	77.2	171	39	0	1	171	47	217	4.1e-73	100	AHW83317.1 APN2, partial [Pochonia chlamydosporia]	pochonia chlamydosporia	pochonia chlamydosporia;pochonia;clavicipitaceae;hypocreales;hypocreomycetidae;sordariomycetes;sordariomyceta;leotiomyceta;pezizomycotina;saccharomyceta;ascomycota;dikarya;fungi;opisthokonta;eukaryota;cellular organisms;root	/LUSTRE/HOME/uva_dpvrf_1/uva_dpvrf_1_3/annotation/entap_outfiles/similarity_search/DIAMOND/blastp_transcripts_fc072v_final_nr.out	No	Yes							5507.FOXG_03614P0	5.3e-93	345.5	APN2	Fungi	fuNOG[21]	03IZ2@ascNOG,0PJN6@fuNOG,0SFDJ@hypNOG,13IIB@opiNOG,19J82@sordNOG,COG0708@NOG,KOG1294@euNOG	3410	GO:0000302-response to reactive oxygen species(L=4),GO:0006139-nucleobase-containing compound metabolic process(L=3),GO:0006259-DNA metabolic process(L=4),GO:0006281-DNA repair(L=5),GO:0006284-base-excision repair(L=7),GO:0006725-cellular aromatic compound metabolic process(L=3),GO:0006807-nitrogen compound metabolic process(L=2),GO:0006950-response to stress(L=2),GO:0006974-cellular response to …	GO:0005575-cellular_component(L=0),GO:0005622-intracellular(L=3),GO:0005623-cell(L=1),GO:0005634-nucleus(L=5),GO:0043226-organelle(L=1),GO:0043227-membrane-bounded organelle(L=2),GO:0043229-intracellular organelle(L=3),GO:0043231-intracellular membrane-bounded organelle(L=4),GO:0044424-intracellular part(L=3),GO:0044464-cell part(L=2),	GO:0003674-molecular_function(L=0),GO:0003676-nucleic acid binding(L=3),GO:0003677-DNA binding(L=4),GO:0003824-catalytic activity(L=1),GO:0003906-DNA-(apurinic or apyrimidinic site) lyase activity(L=4),GO:0004518-nuclease activity(L=4),GO:0004519-endonuclease activity(L=5),GO:0004527-exonuclease activity(L=5),GO:0004528-phosphodiesterase I activity(L=6),GO:0004529-exodeoxyribonuclease activity(L=…
FC072V.10544.1	Partial 3 Prime	AEP03833.1	100	120	0	0	1	120	1	120	1.3e-65	100	AEP03833.1 mating type protein MAT1-2-1 [Fusarium konzum]	fusarium konzum	fusarium konzum;fusarium fujikuroi species complex;fusarium;nectriaceae;hypocreales;hypocreomycetidae;sordariomycetes;sordariomyceta;leotiomyceta;pezizomycotina;saccharomyceta;ascomycota;dikarya;fungi;opisthokonta;eukaryota;cellular organisms;root	/LUSTRE/HOME/uva_dpvrf_1/uva_dpvrf_1_3/annotation/entap_outfiles/similarity_search/DIAMOND/blastp_transcripts_fc072v_final_nr.out	No	Yes							5518.FGSG_08893P0	2e-22	110.5		Fungi	fuNOG[21]	03UM0@ascNOG,0PRVH@fuNOG,0SMJB@hypNOG,0XT0K@NOG,13W6A@opiNOG,19T9G@sordNOG,KOG0527@euNOG
FC072V.10546.1	Complete	KAF4337019.1	98.8	160	2	0	1	160	1	160	4.2e-80	100	KAF4337019.1 50S ribosomal L21e protein [Fusarium beomiforme]	fusarium beomiforme	fusarium beomiforme;fusarium burgessii species complex;fusarium;nectriaceae;hypocreales;hypocreomycetidae;sordariomycetes;sordariomyceta;leotiomyceta;pezizomycotina;saccharomyceta;ascomycota;dikarya;fungi;opisthokonta;eukaryota;cellular organisms;root	/LUSTRE/HOME/uva_dpvrf_1/uva_dpvrf_1_3/annotation/entap_outfiles/similarity_search/DIAMOND/blastp_transcripts_fc072v_final_nr.out	No	Yes							117187.FVEG_02493T0	5.1e-82	308.9	FG08895.1	Fungi	fuNOG[21]	03NW4@ascNOG,0PHM8@fuNOG,0SCCI@hypNOG,0WZHN@necNOG,13IVK@opiNOG,1A5CC@sordNOG,COG2139@NOG,KOG1732@euNOG	3010	GO:0002181-cytoplasmic translation(L=7),GO:0006412-translation(L=5),GO:0008150-biological_process(L=0),GO:0008152-metabolic process(L=1),GO:0009058-biosynthetic process(L=2),GO:0009059-macromolecule biosynthetic process(L=4),GO:0009987-cellular process(L=1),GO:0010467-gene expression(L=4),GO:0019538-protein metabolic process(L=3),GO:0034645-cellular macromolecule biosynthetic process(L=4),GO:0043…	GO:0005575-cellular_component(L=0),GO:0005622-intracellular(L=3),GO:0005623-cell(L=1),GO:0005737-cytoplasm(L=4),GO:0005829-cytosol(L=4),GO:0005840-ribosome(L=5),GO:0015934-large ribosomal subunit(L=6),GO:0022625-cytosolic large ribosomal subunit(L=6),GO:0022626-cytosolic ribosome(L=5),GO:0030529-intracellular ribonucleoprotein complex(L=4),GO:0032991-macromolecular complex(L=1),GO:0043226-organel…	GO:0003674-molecular_function(L=0),GO:0003735-structural constituent of ribosome(L=2),GO:0005198-structural molecule activity(L=1),	GO:0006412-translation(L=5),	GO:0005840-ribosome(L=5),	GO:0003735-structural constituent of ribosome(L=2),	Reactome: R-HSA-156827|Reactome: R-HSA-156902|Reactome: R-HSA-1799339|Reactome: R-HSA-192823|Reactome: R-HSA-2408557|Reactome: R-HSA-6791226|Reactome: R-HSA-72689|Reactome: R-HSA-72706|Reactome: R-HSA-72764|Reactome: R-HSA-9010553|Reactome: R-HSA-9633012|Reactome: R-HSA-975956|Reactome: R-HSA-975957	IPR001147(Ribosomal protein L21e)	Pfam	PF01157(Ribosomal protein L21e)	1.5e-46
FC072V.10545.2	Complete	RKL30137.1	100	172	0	0	1	172	72	243	2.7e-89	90.1	RKL30137.1 40S ribosomal protein S9 [Fusarium proliferatum]	fusarium proliferatum	fusarium proliferatum;fusarium fujikuroi species complex;fusarium;nectriaceae;hypocreales;hypocreomycetidae;sordariomycetes;sordariomyceta;leotiomyceta;pezizomycotina;saccharomyceta;ascomycota;dikarya;fungi;opisthokonta;eukaryota;cellular organisms;root	/LUSTRE/HOME/uva_dpvrf_1/uva_dpvrf_1_3/annotation/entap_outfiles/similarity_search/DIAMOND/blastp_transcripts_fc072v_final_nr.out	No	Yes							117187.FVEG_02494T0	7.2e-91	338.6	RPS9	Fungi	fuNOG[21]	03K4E@ascNOG,0PG10@fuNOG,0SI0J@hypNOG,0WV6X@necNOG,12RIB@opiNOG,19MQ8@sordNOG,COG0522@NOG,KOG3301@euNOG	3010	GO:0000462-maturation of SSU-rRNA from tricistronic rRNA transcript (SSU-rRNA, 5.8S rRNA, LSU-rRNA)(L=9),GO:0002181-cytoplasmic translation(L=7),GO:0006139-nucleobase-containing compound metabolic process(L=3),GO:0006364-rRNA processing(L=7),GO:0006396-RNA processing(L=5),GO:0006412-translation(L=5),GO:0006417-regulation of translation(L=7),GO:0006448-regulation of translational elongation(L=8),G…	GO:0005575-cellular_component(L=0),GO:0005622-intracellular(L=3),GO:0005623-cell(L=1),GO:0005634-nucleus(L=5),GO:0005730-nucleolus(L=5),GO:0005737-cytoplasm(L=4),GO:0005829-cytosol(L=4),GO:0005840-ribosome(L=5),GO:0015935-small ribosomal subunit(L=6),GO:0022626-cytosolic ribosome(L=5),GO:0022627-cytosolic small ribosomal subunit(L=6),GO:0030529-intracellular ribonucleoprotein complex(L=4),GO:0030…	GO:0003674-molecular_function(L=0),GO:0003676-nucleic acid binding(L=3),GO:0003723-RNA binding(L=4),GO:0003735-structural constituent of ribosome(L=2),GO:0005198-structural molecule activity(L=1),GO:0005488-binding(L=1),GO:0019843-rRNA binding(L=5),GO:0097159-organic cyclic compound binding(L=2),GO:1901363-heterocyclic compound binding(L=2),			GO:0003723-RNA binding(L=4),	Reactome: R-HSA-156827|Reactome: R-HSA-156902|Reactome: R-HSA-1799339|Reactome: R-HSA-192823|Reactome: R-HSA-2408557|Reactome: R-HSA-6791226|Reactome: R-HSA-72649|Reactome: R-HSA-72689|Reactome: R-HSA-72695|Reactome: R-HSA-72702|Reactome: R-HSA-72706|Reactome: R-HSA-72764|Reactome: R-HSA-9010553|Reactome: R-HSA-9633012|Reactome: R-HSA-975956|Reactome: R-HSA-975957	IPR002942(RNA-binding S4 domain)	Pfam	PF01479(S4 domain)	3.9e-12
FC072V.10545.1	Partial 5 Prime	RKL30137.1	99	206	2	0	1	206	38	243	6.7e-108	91.6	RKL30137.1 40S ribosomal protein S9 [Fusarium proliferatum]	fusarium proliferatum	fusarium proliferatum;fusarium fujikuroi species complex;fusarium;nectriaceae;hypocreales;hypocreomycetidae;sordariomycetes;sordariomyceta;leotiomyceta;pezizomycotina;saccharomyceta;ascomycota;dikarya;fungi;opisthokonta;eukaryota;cellular organisms;root	/LUSTRE/HOME/uva_dpvrf_1/uva_dpvrf_1_3/annotation/entap_outfiles/similarity_search/DIAMOND/blastp_transcripts_fc072v_final_nr.out	No	Yes							117187.FVEG_02494T0	1.4e-90	337.8	RPS9	Fungi	fuNOG[21]	03K4E@ascNOG,0PG10@fuNOG,0SI0J@hypNOG,0WV6X@necNOG,12RIB@opiNOG,19MQ8@sordNOG,COG0522@NOG,KOG3301@euNOG	3010	GO:0000462-maturation of SSU-rRNA from tricistronic rRNA transcript (SSU-rRNA, 5.8S rRNA, LSU-rRNA)(L=9),GO:0002181-cytoplasmic translation(L=7),GO:0006139-nucleobase-containing compound metabolic process(L=3),GO:0006364-rRNA processing(L=7),GO:0006396-RNA processing(L=5),GO:0006412-translation(L=5),GO:0006417-regulation of translation(L=7),GO:0006448-regulation of translational elongation(L=8),G…	GO:0005575-cellular_component(L=0),GO:0005622-intracellular(L=3),GO:0005623-cell(L=1),GO:0005634-nucleus(L=5),GO:0005730-nucleolus(L=5),GO:0005737-cytoplasm(L=4),GO:0005829-cytosol(L=4),GO:0005840-ribosome(L=5),GO:0015935-small ribosomal subunit(L=6),GO:0022626-cytosolic ribosome(L=5),GO:0022627-cytosolic small ribosomal subunit(L=6),GO:0030529-intracellular ribonucleoprotein complex(L=4),GO:0030…	GO:0003674-molecular_function(L=0),GO:0003676-nucleic acid binding(L=3),GO:0003723-RNA binding(L=4),GO:0003735-structural constituent of ribosome(L=2),GO:0005198-structural molecule activity(L=1),GO:0005488-binding(L=1),GO:0019843-rRNA binding(L=5),GO:0097159-organic cyclic compound binding(L=2),GO:1901363-heterocyclic compound binding(L=2),			GO:0003723-RNA binding(L=4),	Reactome: R-HSA-156827|Reactome: R-HSA-156902|Reactome: R-HSA-1799339|Reactome: R-HSA-192823|Reactome: R-HSA-2408557|Reactome: R-HSA-6791226|Reactome: R-HSA-72649|Reactome: R-HSA-72689|Reactome: R-HSA-72695|Reactome: R-HSA-72702|Reactome: R-HSA-72706|Reactome: R-HSA-72764|Reactome: R-HSA-9010553|Reactome: R-HSA-9633012|Reactome: R-HSA-975956|Reactome: R-HSA-975957	IPR002942(RNA-binding S4 domain)	Pfam	PF01479(S4 domain)	5.1e-12
FC072V.10539.1	Partial 3 Prime	KAF5687712.1	99.8	568	1	0	1	568	101	668	3.9e-298	100	KAF5687712.1 hypothetical protein FCIRC_2244 [Fusarium circinatum]	fusarium circinatum	fusarium circinatum;fusarium fujikuroi species complex;fusarium;nectriaceae;hypocreales;hypocreomycetidae;sordariomycetes;sordariomyceta;leotiomyceta;pezizomycotina;saccharomyceta;ascomycota;dikarya;fungi;opisthokonta;eukaryota;cellular organisms;root	/LUSTRE/HOME/uva_dpvrf_1/uva_dpvrf_1_3/annotation/entap_outfiles/similarity_search/DIAMOND/blastp_transcripts_fc072v_final_nr.out	No	No							5507.FOXG_03623P0	1.7e-281	973.4	FG08899.1	Fungi	fuNOG[21]	042B7@ascNOG,0JNNF@euNOG,0PTFX@fuNOG,0SMHE@hypNOG,0YBC7@NOG,13ZP5@opiNOG,19RGT@sordNOG
FC072V.10543.1	Complete	KAF5966332.1	99.7	347	1	0	1	347	1	347	1.5e-186	100	KAF5966332.1 autophagy-like protein 3 [Fusarium bulbicola]	fusarium bulbicola	fusarium bulbicola;fusarium fujikuroi species complex;fusarium;nectriaceae;hypocreales;hypocreomycetidae;sordariomycetes;sordariomyceta;leotiomyceta;pezizomycotina;saccharomyceta;ascomycota;dikarya;fungi;opisthokonta;eukaryota;cellular organisms;root	/LUSTRE/HOME/uva_dpvrf_1/uva_dpvrf_1_3/annotation/entap_outfiles/similarity_search/DIAMOND/blastp_transcripts_fc072v_final_nr.out	No	Yes							5507.FOXG_03624P0	9.7e-187	657.9	ATG3	Fungi	fuNOG[21]	03KEN@ascNOG,0PIIC@fuNOG,0SB37@hypNOG,0Y3BC@NOG,12PTP@opiNOG,19M6T@sordNOG,KOG2981@euNOG	4140	GO:0000045-autophagosome assembly(L=6),GO:0000079-regulation of cyclin-dependent protein serine/threonine kinase activity(L=9),GO:0000422-mitophagy(L=3),GO:0001932-regulation of protein phosphorylation(L=7),GO:0006355-regulation of transcription, DNA-templated(L=7),GO:0006464-cellular protein modification process(L=5),GO:0006497-protein lipidation(L=6),GO:0006501-C-terminal protein lipidation(L=7…	GO:0005575-cellular_component(L=0),GO:0005622-intracellular(L=3),GO:0005623-cell(L=1),GO:0005634-nucleus(L=5),GO:0005737-cytoplasm(L=4),GO:0005829-cytosol(L=4),GO:0043226-organelle(L=1),GO:0043227-membrane-bounded organelle(L=2),GO:0043229-intracellular organelle(L=3),GO:0043231-intracellular membrane-bounded organelle(L=4),GO:0044424-intracellular part(L=3),GO:0044444-cytoplasmic part(L=4),GO:00…	GO:0003674-molecular_function(L=0),GO:0003824-catalytic activity(L=1),GO:0016874-ligase activity(L=2),GO:0016879-ligase activity, forming carbon-nitrogen bonds(L=3),GO:0019776-Atg8 ligase activity(L=3),				Reactome: R-HSA-1632852	IPR007135(Autophagy-related protein 3)	Pfam	PF03987(Autophagocytosis associated protein, active-site domain)	8.3e-72
FC072V.10538.1	Complete	KAF5602620.1	99.1	330	2	1	1	330	1	329	9.7e-156	100	KAF5602620.1 pre-mRNA splicing factor cwc24 [Fusarium subglutinans]	fusarium subglutinans	fusarium subglutinans;fusarium fujikuroi species complex;fusarium;nectriaceae;hypocreales;hypocreomycetidae;sordariomycetes;sordariomyceta;leotiomyceta;pezizomycotina;saccharomyceta;ascomycota;dikarya;fungi;opisthokonta;eukaryota;cellular organisms;root	/LUSTRE/HOME/uva_dpvrf_1/uva_dpvrf_1_3/annotation/entap_outfiles/similarity_search/DIAMOND/blastp_transcripts_fc072v_final_nr.out	No	Yes							5507.FOXG_03625P0	3.6e-146	523.1	CWC24	Fungi	fuNOG[21]	03KVF@ascNOG,0PJWC@fuNOG,0SHZC@hypNOG,12S1X@opiNOG,19N8B@sordNOG,COG5152@NOG,KOG1813@euNOG		GO:0000349-generation of catalytic spliceosome for first transesterification step(L=8),GO:0000375-RNA splicing, via transesterification reactions(L=7),GO:0000377-RNA splicing, via transesterification reactions with bulged adenosine as nucleophile(L=8),GO:0000393-spliceosomal conformational changes to generate catalytic conformation(L=8),GO:0000398-mRNA splicing, via spliceosome(L=7),GO:0006139-nu…	GO:0005575-cellular_component(L=0),GO:0005622-intracellular(L=3),GO:0005623-cell(L=1),GO:0005634-nucleus(L=5),GO:0005681-spliceosomal complex(L=6),GO:0005684-U2-type spliceosomal complex(L=7),GO:0030529-intracellular ribonucleoprotein complex(L=4),GO:0032991-macromolecular complex(L=1),GO:0043226-organelle(L=1),GO:0043227-membrane-bounded organelle(L=2),GO:0043229-intracellular organelle(L=3),GO:…	GO:0003674-molecular_function(L=0),GO:0003676-nucleic acid binding(L=3),GO:0003677-DNA binding(L=4),GO:0003824-catalytic activity(L=1),GO:0004842-ubiquitin-protein transferase activity(L=4),GO:0005488-binding(L=1),GO:0008080-N-acetyltransferase activity(L=6),GO:0008270-zinc ion binding(L=6),GO:0016407-acetyltransferase activity(L=5),GO:0016410-N-acyltransferase activity(L=5),GO:0016740-transferas…					()	Pfam	PF13920(Zinc finger, C3HC4 type (RING finger))	1.3e-06
FC072V.10537.1
FC072V.10534.1	Partial 5 Prime																								5507.FOXG_00340P0	3.8e-186	657.1	FGSG_01049	Fungi	fuNOG[21]	03MQR@ascNOG,0IHB6@euNOG,0PIS5@fuNOG,0SCSH@hypNOG,0Y8RK@NOG,12TJX@opiNOG,19QTA@sordNOG		GO:0008150-biological_process(L=0),GO:0008152-metabolic process(L=1),GO:0009966-regulation of signal transduction(L=4),GO:0010646-regulation of cell communication(L=4),GO:0019222-regulation of metabolic process(L=3),GO:0023051-regulation of signaling(L=3),GO:0035023-regulation of Rho protein signal transduction(L=8),GO:0044710-single-organism metabolic process(L=2),GO:0046578-regulation of Ras pr…	GO:0005575-cellular_component(L=0),GO:0005622-intracellular(L=3),GO:0005623-cell(L=1),GO:0044464-cell part(L=2),	GO:0003674-molecular_function(L=0),GO:0003824-catalytic activity(L=1),GO:0005085-guanyl-nucleotide exchange factor activity(L=2),GO:0005088-Ras guanyl-nucleotide exchange factor activity(L=3),GO:0005089-Rho guanyl-nucleotide exchange factor activity(L=4),GO:0005488-binding(L=1),GO:0005506-iron ion binding(L=6),GO:0009055-electron carrier activity(L=1),GO:0016491-oxidoreductase activity(L=2),GO:00…
FC072V.10532.1	Complete	KAF5967360.1	99.7	617	2	0	1	617	1	617	0	100	KAF5967360.1 proliferating cell nuclear antigen [Fusarium bulbicola]	fusarium bulbicola	fusarium bulbicola;fusarium fujikuroi species complex;fusarium;nectriaceae;hypocreales;hypocreomycetidae;sordariomycetes;sordariomyceta;leotiomyceta;pezizomycotina;saccharomyceta;ascomycota;dikarya;fungi;opisthokonta;eukaryota;cellular organisms;root	/LUSTRE/HOME/uva_dpvrf_1/uva_dpvrf_1_3/annotation/entap_outfiles/similarity_search/DIAMOND/blastp_transcripts_fc072v_final_nr.out	No	Yes							5518.FGSG_01051P0	5.8e-299	1031.6	FG01051.1	Fungi	fuNOG[21]	03P2R@ascNOG,0IT65@euNOG,0PK0E@fuNOG,0SBDN@hypNOG,0WWCQ@necNOG,0Z6ST@NOG,12Q08@opiNOG,19ITK@sordNOG	3.03034e+27	GO:0006139-nucleobase-containing compound metabolic process(L=3),GO:0006259-DNA metabolic process(L=4),GO:0006260-DNA replication(L=5),GO:0006275-regulation of DNA replication(L=7),GO:0006725-cellular aromatic compound metabolic process(L=3),GO:0006807-nitrogen compound metabolic process(L=2),GO:0008150-biological_process(L=0),GO:0008152-metabolic process(L=1),GO:0009058-biosynthetic process(L=2)…	GO:0005575-cellular_component(L=0),GO:0005622-intracellular(L=3),GO:0005623-cell(L=1),GO:0005634-nucleus(L=5),GO:0032991-macromolecular complex(L=1),GO:0043226-organelle(L=1),GO:0043227-membrane-bounded organelle(L=2),GO:0043229-intracellular organelle(L=3),GO:0043231-intracellular membrane-bounded organelle(L=4),GO:0043234-protein complex(L=2),GO:0043626-PCNA complex(L=5),GO:0044424-intracellula…	GO:0003674-molecular_function(L=0),GO:0003676-nucleic acid binding(L=3),GO:0003677-DNA binding(L=4),GO:0005488-binding(L=1),GO:0030234-enzyme regulator activity(L=2),GO:0030337-DNA polymerase processivity factor activity(L=3),GO:0097159-organic cyclic compound binding(L=2),GO:1901363-heterocyclic compound binding(L=2),			GO:0017022-myosin binding(L=4),		IPR026859(Myosin-binding domain)	Pfam	PF12632(Mysoin-binding motif of peroxisomes)	1.4e-73
FC072V.10529.1	Complete	KAF5671633.1	100	169	0	0	1	169	1	169	3.7e-87	100	KAF5671633.1 dUTP pyrophosphatase [Fusarium circinatum]	fusarium circinatum	fusarium circinatum;fusarium fujikuroi species complex;fusarium;nectriaceae;hypocreales;hypocreomycetidae;sordariomycetes;sordariomyceta;leotiomyceta;pezizomycotina;saccharomyceta;ascomycota;dikarya;fungi;opisthokonta;eukaryota;cellular organisms;root	/LUSTRE/HOME/uva_dpvrf_1/uva_dpvrf_1_3/annotation/entap_outfiles/similarity_search/DIAMOND/blastp_transcripts_fc072v_final_nr.out	No	Yes							5507.FOXG_00335P0	1.9e-87	327	DUT1	Fungi	fuNOG[21]	03RDN@ascNOG,0PNZB@fuNOG,0SBNM@hypNOG,13SGX@opiNOG,19RKW@sordNOG,COG0756@NOG,KOG3370@euNOG	2401100	GO:0006139-nucleobase-containing compound metabolic process(L=3),GO:0006163-purine nucleotide metabolic process(L=5),GO:0006195-purine nucleotide catabolic process(L=7),GO:0006220-pyrimidine nucleotide metabolic process(L=5),GO:0006221-pyrimidine nucleotide biosynthetic process(L=7),GO:0006226-dUMP biosynthetic process(L=8),GO:0006244-pyrimidine nucleotide catabolic process(L=7),GO:0006725-cellul…	GO:0005575-cellular_component(L=0),GO:0005622-intracellular(L=3),GO:0005623-cell(L=1),GO:0005634-nucleus(L=5),GO:0005737-cytoplasm(L=4),GO:0005829-cytosol(L=4),GO:0043226-organelle(L=1),GO:0043227-membrane-bounded organelle(L=2),GO:0043229-intracellular organelle(L=3),GO:0043231-intracellular membrane-bounded organelle(L=4),GO:0044424-intracellular part(L=3),GO:0044444-cytoplasmic part(L=4),GO:00…	GO:0003674-molecular_function(L=0),GO:0003824-catalytic activity(L=1),GO:0004170-dUTP diphosphatase activity(L=7),GO:0005488-binding(L=1),GO:0016462-pyrophosphatase activity(L=5),GO:0016787-hydrolase activity(L=2),GO:0016817-hydrolase activity, acting on acid anhydrides(L=3),GO:0016818-hydrolase activity, acting on acid anhydrides, in phosphorus-containing anhydrides(L=4),GO:0035870-dITP diphosph…					IPR029054(dUTPase-like)	Pfam	PF00692(dUTPase)	1.1e-46
FC072V.10527.1	Complete	KAF5671630.1	100	214	0	0	1	214	1	214	7.7e-122	100	KAF5671630.1 dimeric alpha-beta barrel [Fusarium circinatum]	fusarium circinatum	fusarium circinatum;fusarium fujikuroi species complex;fusarium;nectriaceae;hypocreales;hypocreomycetidae;sordariomycetes;sordariomyceta;leotiomyceta;pezizomycotina;saccharomyceta;ascomycota;dikarya;fungi;opisthokonta;eukaryota;cellular organisms;root	/LUSTRE/HOME/uva_dpvrf_1/uva_dpvrf_1_3/annotation/entap_outfiles/similarity_search/DIAMOND/blastp_transcripts_fc072v_final_nr.out	No	Yes							117187.FVEG_01189T0	6.5e-117	425.2	FG01056.1	Fungi	fuNOG[21]	040MV@ascNOG,0JG0C@euNOG,0PYBF@fuNOG,0SJNM@hypNOG,0WU5C@necNOG,0YWD6@NOG,148F3@opiNOG,19TIT@sordNOG
FC072V.10525.1	Complete	KAF5659657.1	100	540	0	0	1	540	1	540	0	100	KAF5659657.1 neutral sphingomyelinase [Fusarium circinatum]	fusarium circinatum	fusarium circinatum;fusarium fujikuroi species complex;fusarium;nectriaceae;hypocreales;hypocreomycetidae;sordariomycetes;sordariomyceta;leotiomyceta;pezizomycotina;saccharomyceta;ascomycota;dikarya;fungi;opisthokonta;eukaryota;cellular organisms;root	/LUSTRE/HOME/uva_dpvrf_1/uva_dpvrf_1_3/annotation/entap_outfiles/similarity_search/DIAMOND/blastp_transcripts_fc072v_final_nr.out	No	Yes							5518.FGSG_01057P0	8.9e-280	967.6	ISC1	Fungi	fuNOG[21]	03ME2@ascNOG,0PMCN@fuNOG,0SH6P@hypNOG,0WXHE@necNOG,0ZFPY@NOG,139ZB@opiNOG,19MU9@sordNOG,KOG3873@euNOG		GO:0000271-polysaccharide biosynthetic process(L=5),GO:0005975-carbohydrate metabolic process(L=3),GO:0005976-polysaccharide metabolic process(L=4),GO:0006139-nucleobase-containing compound metabolic process(L=3),GO:0006351-transcription, DNA-templated(L=5),GO:0006352-DNA-templated transcription, initiation(L=7),GO:0006629-lipid metabolic process(L=3),GO:0006643-membrane lipid metabolic process(L…	GO:0000428-DNA-directed RNA polymerase complex(L=5),GO:0005575-cellular_component(L=0),GO:0005622-intracellular(L=3),GO:0005623-cell(L=1),GO:0005634-nucleus(L=5),GO:0005654-nucleoplasm(L=5),GO:0005667-transcription factor complex(L=4),GO:0005669-transcription factor TFIID complex(L=7),GO:0005737-cytoplasm(L=4),GO:0005739-mitochondrion(L=5),GO:0005740-mitochondrial envelope(L=6),GO:0005741-mitocho…	GO:0003674-molecular_function(L=0),GO:0003824-catalytic activity(L=1),GO:0004518-nuclease activity(L=4),GO:0004519-endonuclease activity(L=5),GO:0004527-exonuclease activity(L=5),GO:0004620-phospholipase activity(L=5),GO:0004629-phospholipase C activity(L=6),GO:0005488-binding(L=1),GO:0008081-phosphoric diester hydrolase activity(L=5),GO:0016298-lipase activity(L=4),GO:0016787-hydrolase activity(…					IPR005135(Endonuclease/exonuclease/phosphatase)	Pfam	PF03372(Endonuclease/Exonuclease/phosphatase family)	9.7e-13
FC072V.10524.1
FC072V.10523.1	Complete	KAF4437374.1	99.1	463	4	0	1	463	1	463	1.3e-211	100	KAF4437374.1 FK506-binding 4 [Fusarium acutatum]	fusarium acutatum	fusarium acutatum;fusarium fujikuroi species complex;fusarium;nectriaceae;hypocreales;hypocreomycetidae;sordariomycetes;sordariomyceta;leotiomyceta;pezizomycotina;saccharomyceta;ascomycota;dikarya;fungi;opisthokonta;eukaryota;cellular organisms;root	/LUSTRE/HOME/uva_dpvrf_1/uva_dpvrf_1_3/annotation/entap_outfiles/similarity_search/DIAMOND/blastp_transcripts_fc072v_final_nr.out	No	Yes							5518.FGSG_01059P0	1.4e-185	654.4	FPR4	Fungi	fuNOG[21]	03IBR@ascNOG,0PFCG@fuNOG,0SEF5@hypNOG,0WSV1@necNOG,12P1V@opiNOG,19M7N@sordNOG,COG0545@NOG,KOG0552@euNOG		GO:0000003-reproduction(L=1),GO:0000075-cell cycle checkpoint(L=5),GO:0000183-chromatin silencing at rDNA(L=7),GO:0000279-M phase(L=3),GO:0000412-histone peptidyl-prolyl isomerization(L=7),GO:0000413-protein peptidyl-prolyl isomerization(L=8),GO:0000414-regulation of histone H3-K36 methylation(L=8),GO:0000415-negative regulation of histone H3-K36 methylation(L=9),GO:0001775-cell activation(L=3),G…	GO:0000785-chromatin(L=5),GO:0005575-cellular_component(L=0),GO:0005622-intracellular(L=3),GO:0005623-cell(L=1),GO:0005634-nucleus(L=5),GO:0005694-chromosome(L=4),GO:0005730-nucleolus(L=5),GO:0005737-cytoplasm(L=4),GO:0005783-endoplasmic reticulum(L=4),GO:0005789-endoplasmic reticulum membrane(L=3),GO:0005829-cytosol(L=4),GO:0012505-endomembrane system(L=3),GO:0016020-membrane(L=1),GO:0016528-sar…	GO:0000166-nucleotide binding(L=3),GO:0001882-nucleoside binding(L=3),GO:0001883-purine nucleoside binding(L=4),GO:0003674-molecular_function(L=0),GO:0003755-peptidyl-prolyl cis-trans isomerase activity(L=4),GO:0003824-catalytic activity(L=1),GO:0004672-protein kinase activity(L=5),GO:0004674-protein serine/threonine kinase activity(L=6),GO:0005488-binding(L=1),GO:0005524-ATP binding(L=7),GO:0005…					IPR041232(Nucleoplasmin-like domain)	Pfam	PF17800(Nucleoplasmin-like domain)	2.9e-37
FC072V.10519.1	Complete	KAF5679669.1	100	397	0	0	1	397	1	397	4.3e-227	100	KAF5679669.1 NADPH2 dehydrogenase chain OYE2 [Fusarium circinatum]	fusarium circinatum	fusarium circinatum;fusarium fujikuroi species complex;fusarium;nectriaceae;hypocreales;hypocreomycetidae;sordariomycetes;sordariomyceta;leotiomyceta;pezizomycotina;saccharomyceta;ascomycota;dikarya;fungi;opisthokonta;eukaryota;cellular organisms;root	/LUSTRE/HOME/uva_dpvrf_1/uva_dpvrf_1_3/annotation/entap_outfiles/similarity_search/DIAMOND/blastp_transcripts_fc072v_final_nr.out	No	Yes							5507.FOXG_09866P0	3e-224	782.7	FG03355.1	Fungi	fuNOG[21]	03JR9@ascNOG,0PGTG@fuNOG,0SG8N@hypNOG,12R9B@opiNOG,1A3BJ@sordNOG,COG1902@NOG,KOG0134@euNOG		GO:0006091-generation of precursor metabolites and energy(L=3),GO:0006915-apoptotic process(L=5),GO:0008150-biological_process(L=0),GO:0008152-metabolic process(L=1),GO:0008219-cell death(L=3),GO:0009987-cellular process(L=1),GO:0012501-programmed cell death(L=4),GO:0016265-obsolete death(L=),GO:0044237-cellular metabolic process(L=2),GO:0044699-single-organism process(L=1),GO:0044710-single-orga…	GO:0005575-cellular_component(L=0),GO:0005622-intracellular(L=3),GO:0005623-cell(L=1),GO:0005634-nucleus(L=5),GO:0005737-cytoplasm(L=4),GO:0005739-mitochondrion(L=5),GO:0005829-cytosol(L=4),GO:0043226-organelle(L=1),GO:0043227-membrane-bounded organelle(L=2),GO:0043229-intracellular organelle(L=3),GO:0043231-intracellular membrane-bounded organelle(L=4),GO:0044424-intracellular part(L=3),GO:00444…	GO:0000166-nucleotide binding(L=3),GO:0003674-molecular_function(L=0),GO:0003824-catalytic activity(L=1),GO:0003959-NADPH dehydrogenase activity(L=4),GO:0005488-binding(L=1),GO:0008270-zinc ion binding(L=6),GO:0010181-FMN binding(L=3),GO:0016491-oxidoreductase activity(L=2),GO:0016627-oxidoreductase activity, acting on the CH-CH group of donors(L=3),GO:0016628-oxidoreductase activity, acting on t…	GO:0055114-oxidation-reduction process(L=3),		GO:0010181-FMN binding(L=3),GO:0016491-oxidoreductase activity(L=2),		IPR001155(NADH:flavin oxidoreductase/NADH oxidase, N-terminal)	Pfam	PF00724(NADH:flavin oxidoreductase / NADH oxidase family)	9.1e-84
FC072V.10517.1	Complete	KAF5609311.1	95.5	242	11	0	1	242	1	242	4.6e-131	100	KAF5609311.1 glutathione S-transferase [Fusarium subglutinans]	fusarium subglutinans	fusarium subglutinans;fusarium fujikuroi species complex;fusarium;nectriaceae;hypocreales;hypocreomycetidae;sordariomycetes;sordariomyceta;leotiomyceta;pezizomycotina;saccharomyceta;ascomycota;dikarya;fungi;opisthokonta;eukaryota;cellular organisms;root	/LUSTRE/HOME/uva_dpvrf_1/uva_dpvrf_1_3/annotation/entap_outfiles/similarity_search/DIAMOND/blastp_transcripts_fc072v_final_nr.out	No	Yes							5507.FOXG_09853P0	1.1e-131	474.6		Fungi	fuNOG[21]	049Y4@ascNOG,0KPH6@euNOG,0QAT1@fuNOG,0SF65@hypNOG,10WHS@NOG,136MG@opiNOG,1A60X@sordNOG					GO:0006749-glutathione metabolic process(L=4),		GO:0005515-protein binding(L=2),		IPR004045(Glutathione S-transferase, N-terminal)	Pfam	PF13417(Glutathione S-transferase, N-terminal domain)	4.5e-07
FC072V.10513.1
FC072V.10511.1	Partial 3 Prime	KAF5679651.1	100	853	0	0	1	853	2	854	0	100	KAF5679651.1 Lipoteichoic acid synthase-like yvgJ [Fusarium circinatum]	fusarium circinatum	fusarium circinatum;fusarium fujikuroi species complex;fusarium;nectriaceae;hypocreales;hypocreomycetidae;sordariomycetes;sordariomyceta;leotiomyceta;pezizomycotina;saccharomyceta;ascomycota;dikarya;fungi;opisthokonta;eukaryota;cellular organisms;root	/LUSTRE/HOME/uva_dpvrf_1/uva_dpvrf_1_3/annotation/entap_outfiles/similarity_search/DIAMOND/blastp_transcripts_fc072v_final_nr.out	No	Yes							117187.FVEG_08639T0	0	1500.7		Fungi	fuNOG[21]	04AXR@ascNOG,0KNS5@euNOG,0Q9UM@fuNOG,0SJD5@hypNOG,10X7J@NOG,137K7@opiNOG,1A40A@sordNOG		GO:0008150-biological_process(L=0),GO:0008152-metabolic process(L=1),		GO:0003674-molecular_function(L=0),GO:0003824-catalytic activity(L=1),GO:0008484-sulfuric ester hydrolase activity(L=4),GO:0016787-hydrolase activity(L=2),GO:0016788-hydrolase activity, acting on ester bonds(L=3),			GO:0008484-sulfuric ester hydrolase activity(L=4),		IPR000917(Sulfatase, N-terminal)	Pfam	PF00884(Sulfatase)	3e-15
FC072V.10509.1
FC072V.10505.1
FC072V.10500.1
FC072V.10497.1	Partial 3 Prime	RSM02967.1	52.3	132	60	1	5	133	2	133	9.9e-29	79.6	RSM02967.1 hypothetical protein CEP52_007643 [Fusarium sp. AF-4]	fusarium sp. af-4	fusarium sp. af-4;fusarium solani species complex;fusarium;nectriaceae;hypocreales;hypocreomycetidae;sordariomycetes;sordariomyceta;leotiomyceta;pezizomycotina;saccharomyceta;ascomycota;dikarya;fungi;opisthokonta;eukaryota;cellular organisms;root	/LUSTRE/HOME/uva_dpvrf_1/uva_dpvrf_1_3/annotation/entap_outfiles/similarity_search/DIAMOND/blastp_transcripts_fc072v_final_nr.out	No	No							5507.FOXG_02863P0	5.7e-81	305.4	FG08170.1	Fungi	fuNOG[21]	03KGZ@ascNOG,0PHIF@fuNOG,0SFSJ@hypNOG,13NM6@opiNOG,19MQ3@sordNOG,COG0665@NOG,KOG3923@euNOG		GO:0008150-biological_process(L=0),GO:0008152-metabolic process(L=1),GO:0044710-single-organism metabolic process(L=2),GO:0055114-oxidation-reduction process(L=3),		GO:0003674-molecular_function(L=0),GO:0003824-catalytic activity(L=1),GO:0003884-D-amino-acid oxidase activity(L=5),GO:0016491-oxidoreductase activity(L=2),GO:0016638-oxidoreductase activity, acting on the CH-NH2 group of donors(L=3),GO:0016641-oxidoreductase activity, acting on the CH-NH2 group of donors, oxygen as acceptor(L=4),	GO:0055114-oxidation-reduction process(L=3),		GO:0016491-oxidoreductase activity(L=2),		IPR006076(FAD dependent oxidoreductase)	Pfam	PF01266(FAD dependent oxidoreductase)	9e-09
FC072V.10494.1	Complete	KAF5256476.1	96.1	127	5	0	1	127	1	127	1.8e-66	90.7	KAF5256476.1 hypothetical protein FOXYS1_13043 [Fusarium oxysporum]	fusarium oxysporum	fusarium oxysporum;fusarium oxysporum species complex;fusarium;nectriaceae;hypocreales;hypocreomycetidae;sordariomycetes;sordariomyceta;leotiomyceta;pezizomycotina;saccharomyceta;ascomycota;dikarya;fungi;opisthokonta;eukaryota;cellular organisms;root	/LUSTRE/HOME/uva_dpvrf_1/uva_dpvrf_1_3/annotation/entap_outfiles/similarity_search/DIAMOND/blastp_transcripts_fc072v_final_nr.out	No	No							5507.FOXG_02869P0	5.7e-69	265.4		Fungi	fuNOG[21]	04ATK@ascNOG,0KNVB@euNOG,0Q9YP@fuNOG,0SIX8@hypNOG,0YA06@NOG,137G3@opiNOG,1A48V@sordNOG		GO:0005975-carbohydrate metabolic process(L=3),GO:0008150-biological_process(L=0),GO:0008152-metabolic process(L=1),GO:0044238-primary metabolic process(L=2),GO:0071704-organic substance metabolic process(L=2),		GO:0003674-molecular_function(L=0),GO:0003824-catalytic activity(L=1),GO:0004347-glucose-6-phosphate isomerase activity(L=5),GO:0004476-mannose-6-phosphate isomerase activity(L=5),GO:0016853-isomerase activity(L=2),GO:0016860-intramolecular oxidoreductase activity(L=3),GO:0016861-intramolecular oxidoreductase activity, interconverting aldoses and ketoses(L=4),
FC072V.10493.1	Internal																								29850.GGTG_10837T0	1.1e-10	71.2		Fungi	fuNOG[21]	03UAE@ascNOG,0J22C@euNOG,0PRM7@fuNOG,0U9WK@magNOG,0YS20@NOG,13VUH@opiNOG,19XIK@sordNOG				GO:0003674-molecular_function(L=0),GO:0005488-binding(L=1),GO:0008270-zinc ion binding(L=6),GO:0043167-ion binding(L=2),GO:0043169-cation binding(L=3),GO:0046872-metal ion binding(L=4),GO:0046914-transition metal ion binding(L=5),
FC072V.10496.1	Complete	KAF5658017.1	100	124	0	0	1	124	1	124	3.3e-64	100	KAF5658017.1 hypothetical protein FCIRC_13024 [Fusarium circinatum]	fusarium circinatum	fusarium circinatum;fusarium fujikuroi species complex;fusarium;nectriaceae;hypocreales;hypocreomycetidae;sordariomycetes;sordariomyceta;leotiomyceta;pezizomycotina;saccharomyceta;ascomycota;dikarya;fungi;opisthokonta;eukaryota;cellular organisms;root	/LUSTRE/HOME/uva_dpvrf_1/uva_dpvrf_1_3/annotation/entap_outfiles/similarity_search/DIAMOND/blastp_transcripts_fc072v_final_nr.out	No	No							5507.FOXG_08902P0	3.1e-34	149.8		Fungi	fuNOG[21]	04BSN@ascNOG,0KN4J@euNOG,0Q90S@fuNOG,0SKIC@hypNOG,10XU7@NOG,138DZ@opiNOG,1A28U@sordNOG
FC072V.10491.1	Complete	KAF5571241.1	99.8	463	1	0	1	463	1	463	2.4e-261	100	KAF5571241.1 STE24 endopeptidase [Fusarium phyllophilum]	fusarium phyllophilum	fusarium phyllophilum;fusarium fujikuroi species complex;fusarium;nectriaceae;hypocreales;hypocreomycetidae;sordariomycetes;sordariomyceta;leotiomyceta;pezizomycotina;saccharomyceta;ascomycota;dikarya;fungi;opisthokonta;eukaryota;cellular organisms;root	/LUSTRE/HOME/uva_dpvrf_1/uva_dpvrf_1_3/annotation/entap_outfiles/similarity_search/DIAMOND/blastp_transcripts_fc072v_final_nr.out	No	Yes							117187.FVEG_04535T0	5.5e-262	908.3	FG05901.1	Fungi	fuNOG[21]	03IH4@ascNOG,0PFIX@fuNOG,0SH5Z@hypNOG,12N7D@opiNOG,19KM5@sordNOG,COG0501@NOG,KOG2719@euNOG	900	GO:0006508-proteolysis(L=4),GO:0007323-peptide pheromone maturation(L=6),GO:0008150-biological_process(L=0),GO:0008152-metabolic process(L=1),GO:0009987-cellular process(L=1),GO:0010033-response to organic substance(L=3),GO:0010467-gene expression(L=4),GO:0016485-protein processing(L=6),GO:0019236-response to pheromone(L=4),GO:0019538-protein metabolic process(L=3),GO:0032259-methylation(L=2),GO:…	GO:0005575-cellular_component(L=0),GO:0005622-intracellular(L=3),GO:0005623-cell(L=1),GO:0005634-nucleus(L=5),GO:0005635-nuclear envelope(L=4),GO:0005637-nuclear inner membrane(L=5),GO:0005737-cytoplasm(L=4),GO:0005739-mitochondrion(L=5),GO:0005740-mitochondrial envelope(L=6),GO:0005741-mitochondrial outer membrane(L=5),GO:0005783-endoplasmic reticulum(L=4),GO:0005789-endoplasmic reticulum membra…	GO:0003674-molecular_function(L=0),GO:0003824-catalytic activity(L=1),GO:0004175-endopeptidase activity(L=5),GO:0004222-metalloendopeptidase activity(L=6),GO:0005488-binding(L=1),GO:0008168-methyltransferase activity(L=4),GO:0008171-O-methyltransferase activity(L=5),GO:0008233-peptidase activity(L=3),GO:0008237-metallopeptidase activity(L=5),GO:0016740-transferase activity(L=2),GO:0016741-transfe…				KEGG: 00900+3.4.24.84	IPR032456(CAAX prenyl protease 1, N-terminal)	Pfam	PF16491(CAAX prenyl protease N-terminal, five membrane helices)	8.9e-66
FC072V.10487.1	Complete	KAF5688859.1	99.7	1004	3	0	1	1004	1	1004	0	100	KAF5688859.1 mitochondrial presequence protease [Fusarium circinatum]	fusarium circinatum	fusarium circinatum;fusarium fujikuroi species complex;fusarium;nectriaceae;hypocreales;hypocreomycetidae;sordariomycetes;sordariomyceta;leotiomyceta;pezizomycotina;saccharomyceta;ascomycota;dikarya;fungi;opisthokonta;eukaryota;cellular organisms;root	/LUSTRE/HOME/uva_dpvrf_1/uva_dpvrf_1_3/annotation/entap_outfiles/similarity_search/DIAMOND/blastp_transcripts_fc072v_final_nr.out	No	Yes							117187.FVEG_04533T0	0	1983	CYM1	Fungi	fuNOG[21]	03M9T@ascNOG,0PH5B@fuNOG,0SA8V@hypNOG,0WWV8@necNOG,12S57@opiNOG,19JHY@sordNOG,COG1026@NOG,KOG2019@euNOG		GO:0006508-proteolysis(L=4),GO:0006605-protein targeting(L=6),GO:0006626-protein targeting to mitochondrion(L=7),GO:0006627-protein processing involved in protein targeting to mitochondrion(L=8),GO:0006810-transport(L=3),GO:0006839-mitochondrial transport(L=4),GO:0006886-intracellular protein transport(L=5),GO:0006996-organelle organization(L=3),GO:0007005-mitochondrion organization(L=4),GO:00081…	GO:0005575-cellular_component(L=0),GO:0005622-intracellular(L=3),GO:0005623-cell(L=1),GO:0005737-cytoplasm(L=4),GO:0005739-mitochondrion(L=5),GO:0005740-mitochondrial envelope(L=6),GO:0005758-mitochondrial intermembrane space(L=5),GO:0031967-organelle envelope(L=3),GO:0031970-organelle envelope lumen(L=4),GO:0031974-membrane-enclosed lumen(L=1),GO:0031975-envelope(L=3),GO:0043226-organelle(L=1),G…	GO:0003674-molecular_function(L=0),GO:0003824-catalytic activity(L=1),GO:0004175-endopeptidase activity(L=5),GO:0004222-metalloendopeptidase activity(L=6),GO:0005488-binding(L=1),GO:0008233-peptidase activity(L=3),GO:0008237-metallopeptidase activity(L=5),GO:0008270-zinc ion binding(L=6),GO:0016787-hydrolase activity(L=2),GO:0043167-ion binding(L=2),GO:0043169-cation binding(L=3),GO:0046872-metal…	GO:0006508-proteolysis(L=4),			Reactome: R-HSA-1268020	IPR013578(Peptidase M16C associated)	Pfam	PF08367(Peptidase M16C associated)	7.3e-82
FC072V.10476.1
FC072V.10484.1	Complete	KAF5688867.1	100	196	0	0	1	196	31	226	5.5e-106	100	KAF5688867.1 METHIONYL-TRNA SYNTHETASE mitochondrial [Fusarium circinatum]	fusarium circinatum	fusarium circinatum;fusarium fujikuroi species complex;fusarium;nectriaceae;hypocreales;hypocreomycetidae;sordariomycetes;sordariomyceta;leotiomyceta;pezizomycotina;saccharomyceta;ascomycota;dikarya;fungi;opisthokonta;eukaryota;cellular organisms;root	/LUSTRE/HOME/uva_dpvrf_1/uva_dpvrf_1_3/annotation/entap_outfiles/similarity_search/DIAMOND/blastp_transcripts_fc072v_final_nr.out	No	Yes							117187.FVEG_04525T0	2.9e-95	353.2		Fungi	fuNOG[21]	03SBW@ascNOG,0PP4B@fuNOG,0SFT0@hypNOG,11P75@NOG,13Q5A@opiNOG,1A4B9@sordNOG,KOG4135@euNOG		GO:0006464-cellular protein modification process(L=5),GO:0006473-protein acetylation(L=7),GO:0006474-N-terminal protein amino acid acetylation(L=7),GO:0008150-biological_process(L=0),GO:0008152-metabolic process(L=1),GO:0009987-cellular process(L=1),GO:0019538-protein metabolic process(L=3),GO:0031365-N-terminal protein amino acid modification(L=6),GO:0036211-protein modification process(L=4),GO:…	GO:0005575-cellular_component(L=0),GO:0005622-intracellular(L=3),GO:0005623-cell(L=1),GO:0005634-nucleus(L=5),GO:0005737-cytoplasm(L=4),GO:0005829-cytosol(L=4),GO:0043226-organelle(L=1),GO:0043227-membrane-bounded organelle(L=2),GO:0043229-intracellular organelle(L=3),GO:0043231-intracellular membrane-bounded organelle(L=4),GO:0044424-intracellular part(L=3),GO:0044444-cytoplasmic part(L=4),GO:00…	GO:0003674-molecular_function(L=0),GO:0003824-catalytic activity(L=1),GO:0004042-acetyl-CoA:L-glutamate N-acetyltransferase activity(L=7),GO:0008080-N-acetyltransferase activity(L=6),GO:0016407-acetyltransferase activity(L=5),GO:0016410-N-acyltransferase activity(L=5),GO:0016740-transferase activity(L=2),GO:0016746-transferase activity, transferring acyl groups(L=3),GO:0016747-transferase activit…			GO:0008080-N-acetyltransferase activity(L=6),		IPR000182(GNAT domain)	Pfam	PF13302(Acetyltransferase (GNAT) domain)	5.6e-19
FC072V.10482.1	Partial 3 Prime	KAF5266614.1	98.1	103	2	0	75	177	1	103	1.7e-53	57.5	KAF5266614.1 hypothetical protein FOXYS1_2517, partial [Fusarium oxysporum]	fusarium oxysporum	fusarium oxysporum;fusarium oxysporum species complex;fusarium;nectriaceae;hypocreales;hypocreomycetidae;sordariomycetes;sordariomyceta;leotiomyceta;pezizomycotina;saccharomyceta;ascomycota;dikarya;fungi;opisthokonta;eukaryota;cellular organisms;root	/LUSTRE/HOME/uva_dpvrf_1/uva_dpvrf_1_3/annotation/entap_outfiles/similarity_search/DIAMOND/blastp_transcripts_fc072v_final_nr.out	No	No							5507.FOXG_07595P0	3.7e-57	226.5	MSM1	Fungi	fuNOG[21]	03J8A@ascNOG,0PG4Y@fuNOG,0SHHH@hypNOG,12NWF@opiNOG,19PHC@sordNOG,COG0143@NOG,KOG0436@euNOG	450970	GO:0006082-organic acid metabolic process(L=3),GO:0006139-nucleobase-containing compound metabolic process(L=3),GO:0006399-tRNA metabolic process(L=7),GO:0006412-translation(L=5),GO:0006418-tRNA aminoacylation for protein translation(L=6),GO:0006431-methionyl-tRNA aminoacylation(L=7),GO:0006520-cellular amino acid metabolic process(L=3),GO:0006725-cellular aromatic compound metabolic process(L=3)…	GO:0005575-cellular_component(L=0),GO:0005622-intracellular(L=3),GO:0005623-cell(L=1),GO:0005737-cytoplasm(L=4),GO:0005739-mitochondrion(L=5),GO:0005759-mitochondrial matrix(L=6),GO:0031974-membrane-enclosed lumen(L=1),GO:0043226-organelle(L=1),GO:0043227-membrane-bounded organelle(L=2),GO:0043229-intracellular organelle(L=3),GO:0043231-intracellular membrane-bounded organelle(L=4),GO:0043233-org…	GO:0000049-tRNA binding(L=5),GO:0000166-nucleotide binding(L=3),GO:0001882-nucleoside binding(L=3),GO:0001883-purine nucleoside binding(L=4),GO:0003674-molecular_function(L=0),GO:0003676-nucleic acid binding(L=3),GO:0003723-RNA binding(L=4),GO:0003824-catalytic activity(L=1),GO:0004812-aminoacyl-tRNA ligase activity(L=5),GO:0004825-methionine-tRNA ligase activity(L=6),GO:0005488-binding(L=1),GO:0…	GO:0006418-tRNA aminoacylation for protein translation(L=6),		GO:0000166-nucleotide binding(L=3),GO:0004812-aminoacyl-tRNA ligase activity(L=5),GO:0005524-ATP binding(L=7),		IPR015413(Methionyl/Leucyl tRNA synthetase)	Pfam	PF09334(tRNA synthetases class I (M))	3.4e-35
FC072V.10479.1	Complete	KAF5688871.1	100	508	0	0	1	508	1	508	2e-269	100	KAF5688871.1 mevalonate kinase [Fusarium circinatum]	fusarium circinatum	fusarium circinatum;fusarium fujikuroi species complex;fusarium;nectriaceae;hypocreales;hypocreomycetidae;sordariomycetes;sordariomyceta;leotiomyceta;pezizomycotina;saccharomyceta;ascomycota;dikarya;fungi;opisthokonta;eukaryota;cellular organisms;root	/LUSTRE/HOME/uva_dpvrf_1/uva_dpvrf_1_3/annotation/entap_outfiles/similarity_search/DIAMOND/blastp_transcripts_fc072v_final_nr.out	No	Yes							5507.FOXG_07592P0	7.4e-268	927.9	ERG12	Fungi	fuNOG[21]	03ME9@ascNOG,0PIG8@fuNOG,0SD69@hypNOG,12P3A@opiNOG,19JPB@sordNOG,COG1577@NOG,KOG1511@euNOG	900110011104146	GO:0006066-alcohol metabolic process(L=4),GO:0006084-acetyl-CoA metabolic process(L=6),GO:0006417-regulation of translation(L=7),GO:0006629-lipid metabolic process(L=3),GO:0006637-acyl-CoA metabolic process(L=4),GO:0006644-phospholipid metabolic process(L=4),GO:0006694-steroid biosynthetic process(L=5),GO:0006695-cholesterol biosynthetic process(L=7),GO:0006696-ergosterol biosynthetic process(L=5…	GO:0005575-cellular_component(L=0),GO:0005622-intracellular(L=3),GO:0005623-cell(L=1),GO:0005634-nucleus(L=5),GO:0005737-cytoplasm(L=4),GO:0005777-peroxisome(L=6),GO:0005829-cytosol(L=4),GO:0042579-microbody(L=5),GO:0043226-organelle(L=1),GO:0043227-membrane-bounded organelle(L=2),GO:0043229-intracellular organelle(L=3),GO:0043231-intracellular membrane-bounded organelle(L=4),GO:0044424-intracell…	GO:0000166-nucleotide binding(L=3),GO:0001882-nucleoside binding(L=3),GO:0001883-purine nucleoside binding(L=4),GO:0003674-molecular_function(L=0),GO:0003676-nucleic acid binding(L=3),GO:0003723-RNA binding(L=4),GO:0003729-mRNA binding(L=6),GO:0003824-catalytic activity(L=1),GO:0004496-mevalonate kinase activity(L=5),GO:0005488-binding(L=1),GO:0005515-protein binding(L=2),GO:0005524-ATP binding(L…			GO:0005524-ATP binding(L=7),		IPR006204(GHMP kinase N-terminal domain)	Pfam	PF00288(GHMP kinases N terminal domain)	1.2e-16
FC072V.10469.1	Complete	KAF5688875.1	100	424	0	0	1	424	1	424	2.3e-242	100	KAF5688875.1 hypothetical protein FCIRC_1684 [Fusarium circinatum]	fusarium circinatum	fusarium circinatum;fusarium fujikuroi species complex;fusarium;nectriaceae;hypocreales;hypocreomycetidae;sordariomycetes;sordariomyceta;leotiomyceta;pezizomycotina;saccharomyceta;ascomycota;dikarya;fungi;opisthokonta;eukaryota;cellular organisms;root	/LUSTRE/HOME/uva_dpvrf_1/uva_dpvrf_1_3/annotation/entap_outfiles/similarity_search/DIAMOND/blastp_transcripts_fc072v_final_nr.out	No	No							117187.FVEG_04517T0	3.1e-235	819.3	FG05918.1	Fungi	fuNOG[21]	03MZK@ascNOG,0IJX5@euNOG,0PJNN@fuNOG,0SGCT@hypNOG,0WXHP@necNOG,11I2I@NOG,13HVW@opiNOG,19M71@sordNOG
FC072V.10465.1	Partial 3 Prime	KAF5682752.1	99.1	344	1	1	82	423	1	344	1.7e-152	80.9	KAF5682752.1 hypothetical protein FCIRC_4803 [Fusarium circinatum]	fusarium circinatum	fusarium circinatum;fusarium fujikuroi species complex;fusarium;nectriaceae;hypocreales;hypocreomycetidae;sordariomycetes;sordariomyceta;leotiomyceta;pezizomycotina;saccharomyceta;ascomycota;dikarya;fungi;opisthokonta;eukaryota;cellular organisms;root	/LUSTRE/HOME/uva_dpvrf_1/uva_dpvrf_1_3/annotation/entap_outfiles/similarity_search/DIAMOND/blastp_transcripts_fc072v_final_nr.out	No	No							117187.FVEG_05579T0	1e-150	538.5	FG06561.1	Fungi	fuNOG[21]	03ZIU@ascNOG,0JCG8@euNOG,0PXIR@fuNOG,0SEI9@hypNOG,0WWB2@necNOG,0YJVF@NOG,145RD@opiNOG,1A699@sordNOG
FC072V.10463.1	Complete	KAF5613818.1	99.7	339	1	0	1	339	1	339	1.1e-183	100	KAF5613818.1 PHO85 cyclin-7 [Fusarium subglutinans]	fusarium subglutinans	fusarium subglutinans;fusarium fujikuroi species complex;fusarium;nectriaceae;hypocreales;hypocreomycetidae;sordariomycetes;sordariomyceta;leotiomyceta;pezizomycotina;saccharomyceta;ascomycota;dikarya;fungi;opisthokonta;eukaryota;cellular organisms;root	/LUSTRE/HOME/uva_dpvrf_1/uva_dpvrf_1_3/annotation/entap_outfiles/similarity_search/DIAMOND/blastp_transcripts_fc072v_final_nr.out	No	Yes							117187.FVEG_05581T0	3.7e-183	646	FG06558.1	Fungi	fuNOG[21]	03NMH@ascNOG,0PJMA@fuNOG,0SDMG@hypNOG,0WVI7@necNOG,11TTK@NOG,13MRZ@opiNOG,19PV6@sordNOG,KOG1674@euNOG		GO:0000079-regulation of cyclin-dependent protein serine/threonine kinase activity(L=9),GO:0001932-regulation of protein phosphorylation(L=7),GO:0006793-phosphorus metabolic process(L=3),GO:0006796-phosphate-containing compound metabolic process(L=4),GO:0008150-biological_process(L=0),GO:0008152-metabolic process(L=1),GO:0009987-cellular process(L=1),GO:0016310-phosphorylation(L=5),GO:0019220-reg…	GO:0005575-cellular_component(L=0),GO:0005622-intracellular(L=3),GO:0005623-cell(L=1),GO:0005634-nucleus(L=5),GO:0005737-cytoplasm(L=4),GO:0005829-cytosol(L=4),GO:0043226-organelle(L=1),GO:0043227-membrane-bounded organelle(L=2),GO:0043229-intracellular organelle(L=3),GO:0043231-intracellular membrane-bounded organelle(L=4),GO:0044424-intracellular part(L=3),GO:0044444-cytoplasmic part(L=4),GO:00…	GO:0003674-molecular_function(L=0),GO:0003824-catalytic activity(L=1),GO:0016301-kinase activity(L=4),GO:0016740-transferase activity(L=2),GO:0016772-transferase activity, transferring phosphorus-containing groups(L=3),	GO:0000079-regulation of cyclin-dependent protein serine/threonine kinase activity(L=9),		GO:0019901-protein kinase binding(L=5),		IPR013922(Cyclin PHO80-like)	Pfam	PF08613(Cyclin)	6.7e-44
FC072V.10464.2	Complete	KAF5969500.1	98.9	664	7	0	1	664	1	664	0	100	KAF5969500.1 benzoylformate decarboxylase [Fusarium bulbicola]	fusarium bulbicola	fusarium bulbicola;fusarium fujikuroi species complex;fusarium;nectriaceae;hypocreales;hypocreomycetidae;sordariomycetes;sordariomyceta;leotiomyceta;pezizomycotina;saccharomyceta;ascomycota;dikarya;fungi;opisthokonta;eukaryota;cellular organisms;root	/LUSTRE/HOME/uva_dpvrf_1/uva_dpvrf_1_3/annotation/entap_outfiles/similarity_search/DIAMOND/blastp_transcripts_fc072v_final_nr.out	No	Yes							5507.FOXG_02401P0	0	1301.2	FG06557.1	Fungi	fuNOG[21]	03NC0@ascNOG,0IEK0@euNOG,0PJA4@fuNOG,0SJAX@hypNOG,13N0Q@opiNOG,19MA0@sordNOG,COG0028@NOG		GO:0008150-biological_process(L=0),GO:0008152-metabolic process(L=1),		GO:0000166-nucleotide binding(L=3),GO:0000287-magnesium ion binding(L=5),GO:0001882-nucleoside binding(L=3),GO:0001883-purine nucleoside binding(L=4),GO:0003674-molecular_function(L=0),GO:0003824-catalytic activity(L=1),GO:0005488-binding(L=1),GO:0005524-ATP binding(L=7),GO:0017076-purine nucleotide binding(L=4),GO:0019842-vitamin binding(L=3),GO:0030554-adenyl nucleotide binding(L=5),GO:0030976-…			GO:0030976-thiamine pyrophosphate binding(L=3),		IPR012001(Thiamine pyrophosphate enzyme, N-terminal TPP-binding domain)	Pfam	PF02776(Thiamine pyrophosphate enzyme, N-terminal TPP binding domain)	4.4e-38
FC072V.10459.1	Partial 3 Prime	KAF5532535.1	98	153	3	0	1	153	1	153	1.3e-78	100	KAF5532535.1 catalase-1 [Fusarium mexicanum]	fusarium mexicanum	fusarium mexicanum;fusarium fujikuroi species complex;fusarium;nectriaceae;hypocreales;hypocreomycetidae;sordariomycetes;sordariomyceta;leotiomyceta;pezizomycotina;saccharomyceta;ascomycota;dikarya;fungi;opisthokonta;eukaryota;cellular organisms;root	/LUSTRE/HOME/uva_dpvrf_1/uva_dpvrf_1_3/annotation/entap_outfiles/similarity_search/DIAMOND/blastp_transcripts_fc072v_final_nr.out	No	Yes							5507.FOXG_02405P0	3.5e-80	302.8	CATA	Fungi	fuNOG[21]	03PCN@ascNOG,0PFFZ@fuNOG,0SC9I@hypNOG,12Q4B@opiNOG,19IHY@sordNOG,COG0753@NOG,KOG0047@euNOG	3.8063e+17	GO:0000003-reproduction(L=1),GO:0000302-response to reactive oxygen species(L=4),GO:0006950-response to stress(L=2),GO:0006979-response to oxidative stress(L=3),GO:0008150-biological_process(L=0),GO:0008152-metabolic process(L=1),GO:0009056-catabolic process(L=2),GO:0009653-anatomical structure morphogenesis(L=3),GO:0009987-cellular process(L=1),GO:0010035-response to inorganic substance(L=3),GO:…	GO:0005575-cellular_component(L=0),GO:0005576-extracellular region(L=1),GO:0005618-cell wall(L=4),GO:0005619-ascospore wall(L=6),GO:0005623-cell(L=1),GO:0009277-fungal-type cell wall(L=5),GO:0030312-external encapsulating structure(L=3),GO:0031160-spore wall(L=5),GO:0044464-cell part(L=2),GO:0071944-cell periphery(L=3),	GO:0003674-molecular_function(L=0),GO:0003824-catalytic activity(L=1),GO:0004096-catalase activity(L=3),GO:0004601-peroxidase activity(L=2),GO:0005488-binding(L=1),GO:0016209-antioxidant activity(L=1),GO:0016491-oxidoreductase activity(L=2),GO:0016684-oxidoreductase activity, acting on peroxide as acceptor(L=3),GO:0020037-heme binding(L=4),GO:0043167-ion binding(L=2),GO:0043169-cation binding(L=3…	GO:0055114-oxidation-reduction process(L=3),		GO:0004096-catalase activity(L=3),GO:0020037-heme binding(L=4),	KEGG: 00380+1.11.1.6|KEGG: 00630+1.11.1.6|Reactome: R-HSA-3299685|Reactome: R-HSA-6798695|Reactome: R-HSA-9033241|Reactome: R-HSA-9615017	IPR011614(Catalase core domain)	Pfam	PF00199(Catalase)	8.7e-43
FC072V.10456.1	Complete	KAF5685363.1	99.8	665	1	0	1	665	1	665	0	100	KAF5685363.1 transcriptional regulatory protein pro-1 [Fusarium circinatum]	fusarium circinatum	fusarium circinatum;fusarium fujikuroi species complex;fusarium;nectriaceae;hypocreales;hypocreomycetidae;sordariomycetes;sordariomyceta;leotiomyceta;pezizomycotina;saccharomyceta;ascomycota;dikarya;fungi;opisthokonta;eukaryota;cellular organisms;root	/LUSTRE/HOME/uva_dpvrf_1/uva_dpvrf_1_3/annotation/entap_outfiles/similarity_search/DIAMOND/blastp_transcripts_fc072v_final_nr.out	No	Yes							117187.FVEG_08110T0	0	1346.3	FG07067.1	Fungi	fuNOG[21]	03IR7@ascNOG,0IE5Y@euNOG,0PFWM@fuNOG,0SAQQ@hypNOG,0WT5A@necNOG,0XTBB@NOG,12NJB@opiNOG,19MNU@sordNOG		GO:0006139-nucleobase-containing compound metabolic process(L=3),GO:0006351-transcription, DNA-templated(L=5),GO:0006355-regulation of transcription, DNA-templated(L=7),GO:0006357-regulation of transcription from RNA polymerase II promoter(L=8),GO:0006366-transcription from RNA polymerase II promoter(L=6),GO:0006725-cellular aromatic compound metabolic process(L=3),GO:0006807-nitrogen compound me…	GO:0005575-cellular_component(L=0),GO:0005622-intracellular(L=3),GO:0005623-cell(L=1),GO:0005634-nucleus(L=5),GO:0043226-organelle(L=1),GO:0043227-membrane-bounded organelle(L=2),GO:0043229-intracellular organelle(L=3),GO:0043231-intracellular membrane-bounded organelle(L=4),GO:0044424-intracellular part(L=3),GO:0044464-cell part(L=2),	GO:0000981-RNA polymerase II transcription factor activity, sequence-specific DNA binding(L=3),GO:0001071-nucleic acid binding transcription factor activity(L=1),GO:0003674-molecular_function(L=0),GO:0003676-nucleic acid binding(L=3),GO:0003677-DNA binding(L=4),GO:0003700-transcription factor activity, sequence-specific DNA binding(L=2),GO:0005488-binding(L=1),GO:0008270-zinc ion binding(L=6),GO:…					IPR021858(Fungal transcription factor)	Pfam	PF11951(Fungal specific transcription factor domain)	1.5e-86
FC072V.10452.1
FC072V.10453.1	Complete	KAF5685362.1	98.6	828	12	0	1	828	1	828	0	100	KAF5685362.1 pob1 [Fusarium circinatum]	fusarium circinatum	fusarium circinatum;fusarium fujikuroi species complex;fusarium;nectriaceae;hypocreales;hypocreomycetidae;sordariomycetes;sordariomyceta;leotiomyceta;pezizomycotina;saccharomyceta;ascomycota;dikarya;fungi;opisthokonta;eukaryota;cellular organisms;root	/LUSTRE/HOME/uva_dpvrf_1/uva_dpvrf_1_3/annotation/entap_outfiles/similarity_search/DIAMOND/blastp_transcripts_fc072v_final_nr.out	No	Yes							5507.FOXG_01739P0	0	1565.4	FG07068.1	Fungi	fuNOG[21]	03NUN@ascNOG,0IJKT@euNOG,0PJCT@fuNOG,0SADN@hypNOG,0XS9R@NOG,13HUY@opiNOG,19JSU@sordNOG				GO:0003674-molecular_function(L=0),GO:0005488-binding(L=1),GO:0005543-phospholipid binding(L=3),GO:0008289-lipid binding(L=2),GO:0043167-ion binding(L=2),GO:0043168-anion binding(L=3),			GO:0005515-protein binding(L=2),		IPR001660(Sterile alpha motif domain)	Pfam	PF07647(SAM domain (Sterile alpha motif))	5.5e-06
FC072V.10455.1	Complete	KAF5596945.1	99.5	397	2	0	1	397	1	397	2.6e-224	100	KAF5596945.1 cAMP-dependent kinase regulatory subunit [Fusarium subglutinans]	fusarium subglutinans	fusarium subglutinans;fusarium fujikuroi species complex;fusarium;nectriaceae;hypocreales;hypocreomycetidae;sordariomycetes;sordariomyceta;leotiomyceta;pezizomycotina;saccharomyceta;ascomycota;dikarya;fungi;opisthokonta;eukaryota;cellular organisms;root	/LUSTRE/HOME/uva_dpvrf_1/uva_dpvrf_1_3/annotation/entap_outfiles/similarity_search/DIAMOND/blastp_transcripts_fc072v_final_nr.out	No	Yes							117187.FVEG_02622T0	8.7e-224	781.2	PKAR	Fungi	fuNOG[21]	03M7P@ascNOG,0PGW3@fuNOG,0SCV1@hypNOG,0WZ0C@necNOG,12RDS@opiNOG,19KGF@sordNOG,COG0664@NOG,KOG1113@euNOG	42104910	GO:0000003-reproduction(L=1),GO:0001932-regulation of protein phosphorylation(L=7),GO:0001933-negative regulation of protein phosphorylation(L=8),GO:0003008-system process(L=2),GO:0006082-organic acid metabolic process(L=3),GO:0006469-negative regulation of protein kinase activity(L=7),GO:0006629-lipid metabolic process(L=3),GO:0006631-fatty acid metabolic process(L=4),GO:0006793-phosphorus metab…	GO:0005575-cellular_component(L=0),GO:0005622-intracellular(L=3),GO:0005623-cell(L=1),GO:0005634-nucleus(L=5),GO:0005737-cytoplasm(L=4),GO:0005739-mitochondrion(L=5),GO:0005740-mitochondrial envelope(L=6),GO:0005743-mitochondrial inner membrane(L=5),GO:0005813-centrosome(L=5),GO:0005815-microtubule organizing center(L=6),GO:0005829-cytosol(L=4),GO:0005856-cytoskeleton(L=5),GO:0005886-plasma membr…	GO:0000166-nucleotide binding(L=3),GO:0003674-molecular_function(L=0),GO:0003824-catalytic activity(L=1),GO:0004857-enzyme inhibitor activity(L=3),GO:0004860-protein kinase inhibitor activity(L=5),GO:0004862-cAMP-dependent protein kinase inhibitor activity(L=7),GO:0005488-binding(L=1),GO:0005515-protein binding(L=2),GO:0008603-cAMP-dependent protein kinase regulator activity(L=5),GO:0016301-kinas…					IPR000595(Cyclic nucleotide-binding domain)	Pfam	PF00027(Cyclic nucleotide-binding domain)	1.4e-19
FC072V.10454.2	Complete	KAF5681825.1	100	200	0	0	1	200	1	200	2.1e-100	100	KAF5681825.1 BCAS2 family [Fusarium circinatum]	fusarium circinatum	fusarium circinatum;fusarium fujikuroi species complex;fusarium;nectriaceae;hypocreales;hypocreomycetidae;sordariomycetes;sordariomyceta;leotiomyceta;pezizomycotina;saccharomyceta;ascomycota;dikarya;fungi;opisthokonta;eukaryota;cellular organisms;root	/LUSTRE/HOME/uva_dpvrf_1/uva_dpvrf_1_3/annotation/entap_outfiles/similarity_search/DIAMOND/blastp_transcripts_fc072v_final_nr.out	No	Yes							5507.FOXG_05518P0	1.4e-97	360.9	FG09907.1	Fungi	fuNOG[21]	03SP2@ascNOG,0PQ7D@fuNOG,0SKEF@hypNOG,101IB@NOG,12PB4@opiNOG,19SG4@sordNOG,KOG3096@euNOG	3040	GO:0006139-nucleobase-containing compound metabolic process(L=3),GO:0006396-RNA processing(L=5),GO:0006397-mRNA processing(L=7),GO:0006725-cellular aromatic compound metabolic process(L=3),GO:0006807-nitrogen compound metabolic process(L=2),GO:0008150-biological_process(L=0),GO:0008152-metabolic process(L=1),GO:0009987-cellular process(L=1),GO:0010467-gene expression(L=4),GO:0016070-RNA metabolic…			GO:0006397-mRNA processing(L=7),			Reactome: R-HSA-72163	IPR008409(Pre-mRNA-splicing factor SPF27)	Pfam	PF05700(Breast carcinoma amplified sequence 2 (BCAS2))	2.8e-53
FC072V.10447.1	Complete	KAF5692320.1	100	403	0	0	1	403	1	403	1e-239	100	KAF5692320.1 omega-6 fatty acid desaturase (delta-12 desaturase) [Fusarium circinatum]	fusarium circinatum	fusarium circinatum;fusarium fujikuroi species complex;fusarium;nectriaceae;hypocreales;hypocreomycetidae;sordariomycetes;sordariomyceta;leotiomyceta;pezizomycotina;saccharomyceta;ascomycota;dikarya;fungi;opisthokonta;eukaryota;cellular organisms;root	/LUSTRE/HOME/uva_dpvrf_1/uva_dpvrf_1_3/annotation/entap_outfiles/similarity_search/DIAMOND/blastp_transcripts_fc072v_final_nr.out	No	Yes							5507.FOXG_03793P0	7.5e-239	831.2		Fungi	fuNOG[21]	03NJA@ascNOG,0IGY2@euNOG,0PJJG@fuNOG,0SEQA@hypNOG,13I9U@opiNOG,19JFF@sordNOG,COG3239@NOG	1040	GO:0006082-organic acid metabolic process(L=3),GO:0006629-lipid metabolic process(L=3),GO:0006631-fatty acid metabolic process(L=4),GO:0006633-fatty acid biosynthetic process(L=5),GO:0008150-biological_process(L=0),GO:0008152-metabolic process(L=1),GO:0008610-lipid biosynthetic process(L=4),GO:0009058-biosynthetic process(L=2),GO:0009987-cellular process(L=1),GO:0016053-organic acid biosynthetic …		GO:0003674-molecular_function(L=0),GO:0003824-catalytic activity(L=1),GO:0016491-oxidoreductase activity(L=2),GO:0016705-oxidoreductase activity, acting on paired donors, with incorporation or reduction of molecular oxygen(L=3),GO:0016717-oxidoreductase activity, acting on paired donors, with oxidation of a pair of donors resulting in the reduction of molecular oxygen to two molecules of water(L=…	GO:0006629-lipid metabolic process(L=3),				IPR005804(Fatty acid desaturase domain)	Pfam	PF00487(Fatty acid desaturase)	2.9e-26
FC072V.10442.2	Partial 5 Prime	KAF5692309.1	99	293	3	0	1	293	2	294	4.7e-170	100	KAF5692309.1 chitinase [Fusarium circinatum]	fusarium circinatum	fusarium circinatum;fusarium fujikuroi species complex;fusarium;nectriaceae;hypocreales;hypocreomycetidae;sordariomycetes;sordariomyceta;leotiomyceta;pezizomycotina;saccharomyceta;ascomycota;dikarya;fungi;opisthokonta;eukaryota;cellular organisms;root	/LUSTRE/HOME/uva_dpvrf_1/uva_dpvrf_1_3/annotation/entap_outfiles/similarity_search/DIAMOND/blastp_transcripts_fc072v_final_nr.out	No	Yes							117187.FVEG_12053T0	5.4e-170	602.1	FG02170.1	Fungi	fuNOG[21]	04AB4@ascNOG,0KP7B@euNOG,0QAED@fuNOG,0SH8S@hypNOG,0WY83@necNOG,10WT5@NOG,1370C@opiNOG,1A596@sordNOG		GO:0005975-carbohydrate metabolic process(L=3),GO:0008150-biological_process(L=0),GO:0008152-metabolic process(L=1),GO:0044238-primary metabolic process(L=2),GO:0071704-organic substance metabolic process(L=2),		GO:0003674-molecular_function(L=0),GO:0003824-catalytic activity(L=1),GO:0004553-hydrolase activity, hydrolyzing O-glycosyl compounds(L=4),GO:0016787-hydrolase activity(L=2),GO:0016798-hydrolase activity, acting on glycosyl bonds(L=3),	GO:0005975-carbohydrate metabolic process(L=3),				IPR001223(Glycoside hydrolase family 18, catalytic domain)	Pfam	PF00704(Glycosyl hydrolases family 18)	7.3e-15
FC072V.10439.1	Partial 5 Prime	KAF5680998.1	100	334	0	0	1	334	78	411	9.4e-191	100	KAF5680998.1 O-methyltransferase B [Fusarium circinatum]	fusarium circinatum	fusarium circinatum;fusarium fujikuroi species complex;fusarium;nectriaceae;hypocreales;hypocreomycetidae;sordariomycetes;sordariomyceta;leotiomyceta;pezizomycotina;saccharomyceta;ascomycota;dikarya;fungi;opisthokonta;eukaryota;cellular organisms;root	/LUSTRE/HOME/uva_dpvrf_1/uva_dpvrf_1_3/annotation/entap_outfiles/similarity_search/DIAMOND/blastp_transcripts_fc072v_final_nr.out	No	Yes							5507.FOXG_11561P0	1.5e-184	650.6		Fungi	fuNOG[21]	03SWM@ascNOG,0PPYX@fuNOG,0SD9N@hypNOG,0XS7T@NOG,13SPP@opiNOG,19R5A@sordNOG,KOG3178@euNOG		GO:0008150-biological_process(L=0),GO:0008152-metabolic process(L=1),GO:0032259-methylation(L=2),		GO:0003674-molecular_function(L=0),GO:0003824-catalytic activity(L=1),GO:0008168-methyltransferase activity(L=4),GO:0008171-O-methyltransferase activity(L=5),GO:0016740-transferase activity(L=2),GO:0016741-transferase activity, transferring one-carbon groups(L=3),			GO:0008171-O-methyltransferase activity(L=5),		IPR001077(O-methyltransferase domain)	Pfam	PF00891(O-methyltransferase domain)	1.8e-24
FC072V.10436.1	Partial 5 Prime	RBQ77851.1	96.2	184	7	0	30	213	1	184	9.8e-93	86.4	RBQ77851.1 hypothetical protein FVER14953_21616 [Fusarium verticillioides]	fusarium verticillioides	fusarium verticillioides;fusarium fujikuroi species complex;fusarium;nectriaceae;hypocreales;hypocreomycetidae;sordariomycetes;sordariomyceta;leotiomyceta;pezizomycotina;saccharomyceta;ascomycota;dikarya;fungi;opisthokonta;eukaryota;cellular organisms;root	/LUSTRE/HOME/uva_dpvrf_1/uva_dpvrf_1_3/annotation/entap_outfiles/similarity_search/DIAMOND/blastp_transcripts_fc072v_final_nr.out	No	No							117187.FVEG_12113T0	5.3e-111	405.6		Fungi	fuNOG[21]	03NSM@ascNOG,0PHIN@fuNOG,0SGM3@hypNOG,0WYZA@necNOG,0XNQK@NOG,13PKA@opiNOG,19JSG@sordNOG,KOG0254@euNOG		GO:0006810-transport(L=3),GO:0008150-biological_process(L=0),GO:0008643-carbohydrate transport(L=4),GO:0009987-cellular process(L=1),GO:0044699-single-organism process(L=1),GO:0044763-single-organism cellular process(L=2),GO:0044765-single-organism transport(L=3),GO:0051179-localization(L=1),GO:0051234-establishment of localization(L=2),GO:0055085-transmembrane transport(L=4),GO:0071702-organic s…	GO:0005575-cellular_component(L=0),GO:0016020-membrane(L=1),GO:0016021-integral component of membrane(L=4),GO:0031224-intrinsic component of membrane(L=3),GO:0044425-membrane part(L=2),	GO:0003674-molecular_function(L=0),GO:0005215-transporter activity(L=1),GO:0022857-transmembrane transporter activity(L=2),GO:0022891-substrate-specific transmembrane transporter activity(L=3),GO:0022892-substrate-specific transporter activity(L=2),	GO:0055085-transmembrane transport(L=4),	GO:0016021-integral component of membrane(L=4),	GO:0022857-transmembrane transporter activity(L=2),		IPR005828(Major facilitator, sugar transporter-like)	Pfam	PF00083(Sugar (and other) transporter)	1.1e-26
FC072V.10435.1	Complete	KAF5661879.1	99.8	479	1	0	1	479	1	479	1.3e-278	100	KAF5661879.1 oleate delta-12 desaturase [Fusarium circinatum]	fusarium circinatum	fusarium circinatum;fusarium fujikuroi species complex;fusarium;nectriaceae;hypocreales;hypocreomycetidae;sordariomycetes;sordariomyceta;leotiomyceta;pezizomycotina;saccharomyceta;ascomycota;dikarya;fungi;opisthokonta;eukaryota;cellular organisms;root	/LUSTRE/HOME/uva_dpvrf_1/uva_dpvrf_1_3/annotation/entap_outfiles/similarity_search/DIAMOND/blastp_transcripts_fc072v_final_nr.out	No	Yes							117187.FVEG_05830T0	1.7e-277	959.9	PGUG_03640	Fungi	fuNOG[21]	03JDQ@ascNOG,0IFN9@euNOG,0PGFX@fuNOG,0SB9V@hypNOG,0WZ13@necNOG,12P1U@opiNOG,19R0X@sordNOG,COG3239@NOG	1040	GO:0000003-reproduction(L=1),GO:0006082-organic acid metabolic process(L=3),GO:0006629-lipid metabolic process(L=3),GO:0006631-fatty acid metabolic process(L=4),GO:0006633-fatty acid biosynthetic process(L=5),GO:0008150-biological_process(L=0),GO:0008152-metabolic process(L=1),GO:0008610-lipid biosynthetic process(L=4),GO:0009058-biosynthetic process(L=2),GO:0009653-anatomical structure morphogen…		GO:0003674-molecular_function(L=0),GO:0003824-catalytic activity(L=1),GO:0016491-oxidoreductase activity(L=2),GO:0016627-oxidoreductase activity, acting on the CH-CH group of donors(L=3),GO:0016628-oxidoreductase activity, acting on the CH-CH group of donors, NAD or NADP as acceptor(L=4),GO:0016705-oxidoreductase activity, acting on paired donors, with incorporation or reduction of molecular oxyg…	GO:0006629-lipid metabolic process(L=3),				IPR005804(Fatty acid desaturase domain)	Pfam	PF00487(Fatty acid desaturase)	1.3e-25
FC072V.10433.1	Complete	KAF5661882.1	100	708	0	0	1	708	1	708	0	100	KAF5661882.1 Rab6 GTPase activating GAP [Fusarium circinatum]	fusarium circinatum	fusarium circinatum;fusarium fujikuroi species complex;fusarium;nectriaceae;hypocreales;hypocreomycetidae;sordariomycetes;sordariomyceta;leotiomyceta;pezizomycotina;saccharomyceta;ascomycota;dikarya;fungi;opisthokonta;eukaryota;cellular organisms;root	/LUSTRE/HOME/uva_dpvrf_1/uva_dpvrf_1_3/annotation/entap_outfiles/similarity_search/DIAMOND/blastp_transcripts_fc072v_final_nr.out	No	Yes							117187.FVEG_05826T0	0	1296.6	FG05780.1	Fungi	fuNOG[21]	03PN0@ascNOG,0PGK1@fuNOG,0SENY@hypNOG,0WW1R@necNOG,12P4U@opiNOG,19R2T@sordNOG,COG5210@NOG,KOG2223@euNOG	5166	GO:0006139-nucleobase-containing compound metabolic process(L=3),GO:0006140-regulation of nucleotide metabolic process(L=6),GO:0006259-DNA metabolic process(L=4),GO:0006260-DNA replication(L=5),GO:0006278-RNA-dependent DNA biosynthetic process(L=7),GO:0006725-cellular aromatic compound metabolic process(L=3),GO:0006807-nitrogen compound metabolic process(L=2),GO:0006810-transport(L=3),GO:0008150-…	GO:0005575-cellular_component(L=0),GO:0005622-intracellular(L=3),GO:0005623-cell(L=1),GO:0005634-nucleus(L=5),GO:0005737-cytoplasm(L=4),GO:0005794-Golgi apparatus(L=4),GO:0043226-organelle(L=1),GO:0043227-membrane-bounded organelle(L=2),GO:0043229-intracellular organelle(L=3),GO:0043231-intracellular membrane-bounded organelle(L=4),GO:0044424-intracellular part(L=3),GO:0044444-cytoplasmic part(L=…	GO:0003674-molecular_function(L=0),GO:0003676-nucleic acid binding(L=3),GO:0003677-DNA binding(L=4),GO:0003720-telomerase activity(L=7),GO:0003721-telomerase RNA reverse transcriptase activity(L=8),GO:0003723-RNA binding(L=4),GO:0003824-catalytic activity(L=1),GO:0003964-RNA-directed DNA polymerase activity(L=6),GO:0005096-GTPase activator activity(L=4),GO:0005488-binding(L=1),GO:0008047-enzyme a…					IPR000195(Rab-GTPase-TBC domain)	Pfam	PF00566(Rab-GTPase-TBC domain)	9.6e-26
FC072V.10432.1	Complete	KAF5536001.1	99.2	528	4	0	1	528	1	528	1.2e-285	100	KAF5536001.1 t-complex 1 subunit beta [Fusarium napiforme]	fusarium napiforme	fusarium napiforme;fusarium fujikuroi species complex;fusarium;nectriaceae;hypocreales;hypocreomycetidae;sordariomycetes;sordariomyceta;leotiomyceta;pezizomycotina;saccharomyceta;ascomycota;dikarya;fungi;opisthokonta;eukaryota;cellular organisms;root	/LUSTRE/HOME/uva_dpvrf_1/uva_dpvrf_1_3/annotation/entap_outfiles/similarity_search/DIAMOND/blastp_transcripts_fc072v_final_nr.out	No	Yes							117187.FVEG_05823T0	1.6e-286	989.9	CCT2	Fungi	fuNOG[21]	03K2H@ascNOG,0PH52@fuNOG,0SFHP@hypNOG,0WYAE@necNOG,12PBE@opiNOG,19Q6D@sordNOG,COG0459@NOG,KOG0363@euNOG		GO:0006457-protein folding(L=2),GO:0006461-protein complex assembly(L=5),GO:0006996-organelle organization(L=3),GO:0007010-cytoskeleton organization(L=4),GO:0007021-tubulin complex assembly(L=7),GO:0008150-biological_process(L=0),GO:0008152-metabolic process(L=1),GO:0009987-cellular process(L=1),GO:0016043-cellular component organization(L=2),GO:0019538-protein metabolic process(L=3),GO:0022607-c…	GO:0005575-cellular_component(L=0),GO:0005622-intracellular(L=3),GO:0005623-cell(L=1),GO:0005634-nucleus(L=5),GO:0005737-cytoplasm(L=4),GO:0005829-cytosol(L=4),GO:0005832-chaperonin-containing T-complex(L=6),GO:0005856-cytoskeleton(L=5),GO:0032991-macromolecular complex(L=1),GO:0043226-organelle(L=1),GO:0043227-membrane-bounded organelle(L=2),GO:0043228-non-membrane-bounded organelle(L=2),GO:0043…	GO:0000166-nucleotide binding(L=3),GO:0001882-nucleoside binding(L=3),GO:0001883-purine nucleoside binding(L=4),GO:0003674-molecular_function(L=0),GO:0005488-binding(L=1),GO:0005515-protein binding(L=2),GO:0005524-ATP binding(L=7),GO:0017076-purine nucleotide binding(L=4),GO:0030554-adenyl nucleotide binding(L=5),GO:0032549-ribonucleoside binding(L=4),GO:0032550-purine ribonucleoside binding(L=5)…			GO:0005524-ATP binding(L=7),		IPR002423(Chaperonin Cpn60/TCP-1 family)	Pfam	PF00118(TCP-1/cpn60 chaperonin family)	1.3e-142
FC072V.10430.2	Complete	KAF5611376.1	96.3	1252	8	1	1	1214	1	1252	0	100	KAF5611376.1 IRE kinase [Fusarium subglutinans]	fusarium subglutinans	fusarium subglutinans;fusarium fujikuroi species complex;fusarium;nectriaceae;hypocreales;hypocreomycetidae;sordariomycetes;sordariomyceta;leotiomyceta;pezizomycotina;saccharomyceta;ascomycota;dikarya;fungi;opisthokonta;eukaryota;cellular organisms;root	/LUSTRE/HOME/uva_dpvrf_1/uva_dpvrf_1_3/annotation/entap_outfiles/similarity_search/DIAMOND/blastp_transcripts_fc072v_final_nr.out	No	Yes							5507.FOXG_08844P0	0	2308.9	IRE1	Fungi	fuNOG[21]	03IF4@ascNOG,0PFXN@fuNOG,0SEEB@hypNOG,12NK5@opiNOG,19JNE@sordNOG,COG0515@NOG,KOG1027@euNOG	41415010	GO:0005975-carbohydrate metabolic process(L=3),GO:0006020-inositol metabolic process(L=3),GO:0006066-alcohol metabolic process(L=4),GO:0006139-nucleobase-containing compound metabolic process(L=3),GO:0006351-transcription, DNA-templated(L=5),GO:0006355-regulation of transcription, DNA-templated(L=7),GO:0006396-RNA processing(L=5),GO:0006397-mRNA processing(L=7),GO:0006401-RNA catabolic process(L=…	GO:0005575-cellular_component(L=0),GO:0005622-intracellular(L=3),GO:0005623-cell(L=1),GO:0005634-nucleus(L=5),GO:0005737-cytoplasm(L=4),GO:0005783-endoplasmic reticulum(L=4),GO:0005789-endoplasmic reticulum membrane(L=3),GO:0012505-endomembrane system(L=3),GO:0016020-membrane(L=1),GO:0016021-integral component of membrane(L=4),GO:0031090-organelle membrane(L=3),GO:0031224-intrinsic component of m…	GO:0000166-nucleotide binding(L=3),GO:0001882-nucleoside binding(L=3),GO:0001883-purine nucleoside binding(L=4),GO:0003674-molecular_function(L=0),GO:0003824-catalytic activity(L=1),GO:0004518-nuclease activity(L=4),GO:0004519-endonuclease activity(L=5),GO:0004521-endoribonuclease activity(L=6),GO:0004540-ribonuclease activity(L=5),GO:0004672-protein kinase activity(L=5),GO:0004674-protein serine…	GO:0006397-mRNA processing(L=7),		GO:0004540-ribonuclease activity(L=5),	KEGG: 04150+2.7.11.1|KEGG: 04151+2.7.11.1|KEGG: 04714+2.7.11.1|KEGG: 04926+2.7.11.1|KEGG: 05163+2.7.11.1|KEGG: 05165+2.7.11.1|KEGG: 05170+2.7.11.1	IPR010513(KEN domain)	Pfam	PF06479(Ribonuclease 2-5A)	2e-41
FC072V.10430.1	Complete	KAF5611376.1	99.4	1252	8	0	1	1252	1	1252	0	100	KAF5611376.1 IRE kinase [Fusarium subglutinans]	fusarium subglutinans	fusarium subglutinans;fusarium fujikuroi species complex;fusarium;nectriaceae;hypocreales;hypocreomycetidae;sordariomycetes;sordariomyceta;leotiomyceta;pezizomycotina;saccharomyceta;ascomycota;dikarya;fungi;opisthokonta;eukaryota;cellular organisms;root	/LUSTRE/HOME/uva_dpvrf_1/uva_dpvrf_1_3/annotation/entap_outfiles/similarity_search/DIAMOND/blastp_transcripts_fc072v_final_nr.out	No	Yes							5507.FOXG_08844P0	0	2370.1	IRE1	Fungi	fuNOG[21]	03IF4@ascNOG,0PFXN@fuNOG,0SEEB@hypNOG,12NK5@opiNOG,19JNE@sordNOG,COG0515@NOG,KOG1027@euNOG	41415010	GO:0005975-carbohydrate metabolic process(L=3),GO:0006020-inositol metabolic process(L=3),GO:0006066-alcohol metabolic process(L=4),GO:0006139-nucleobase-containing compound metabolic process(L=3),GO:0006351-transcription, DNA-templated(L=5),GO:0006355-regulation of transcription, DNA-templated(L=7),GO:0006396-RNA processing(L=5),GO:0006397-mRNA processing(L=7),GO:0006401-RNA catabolic process(L=…	GO:0005575-cellular_component(L=0),GO:0005622-intracellular(L=3),GO:0005623-cell(L=1),GO:0005634-nucleus(L=5),GO:0005737-cytoplasm(L=4),GO:0005783-endoplasmic reticulum(L=4),GO:0005789-endoplasmic reticulum membrane(L=3),GO:0012505-endomembrane system(L=3),GO:0016020-membrane(L=1),GO:0016021-integral component of membrane(L=4),GO:0031090-organelle membrane(L=3),GO:0031224-intrinsic component of m…	GO:0000166-nucleotide binding(L=3),GO:0001882-nucleoside binding(L=3),GO:0001883-purine nucleoside binding(L=4),GO:0003674-molecular_function(L=0),GO:0003824-catalytic activity(L=1),GO:0004518-nuclease activity(L=4),GO:0004519-endonuclease activity(L=5),GO:0004521-endoribonuclease activity(L=6),GO:0004540-ribonuclease activity(L=5),GO:0004672-protein kinase activity(L=5),GO:0004674-protein serine…	GO:0006397-mRNA processing(L=7),		GO:0004540-ribonuclease activity(L=5),	KEGG: 04150+2.7.11.1|KEGG: 04151+2.7.11.1|KEGG: 04714+2.7.11.1|KEGG: 04926+2.7.11.1|KEGG: 05163+2.7.11.1|KEGG: 05165+2.7.11.1|KEGG: 05170+2.7.11.1	IPR010513(KEN domain)	Pfam	PF06479(Ribonuclease 2-5A)	2.1e-41
FC072V.10429.1	Complete	KAF5656126.1	100	777	0	0	1	777	1	777	0	100	KAF5656126.1 e3 ubiquitin ligase [Fusarium circinatum]	fusarium circinatum	fusarium circinatum;fusarium fujikuroi species complex;fusarium;nectriaceae;hypocreales;hypocreomycetidae;sordariomycetes;sordariomyceta;leotiomyceta;pezizomycotina;saccharomyceta;ascomycota;dikarya;fungi;opisthokonta;eukaryota;cellular organisms;root	/LUSTRE/HOME/uva_dpvrf_1/uva_dpvrf_1_3/annotation/entap_outfiles/similarity_search/DIAMOND/blastp_transcripts_fc072v_final_nr.out	No	Yes							117187.FVEG_05819T0	0	1265.8	FG05774.1	Fungi	fuNOG[21]	03ME1@ascNOG,0PKRG@fuNOG,0SA37@hypNOG,13HX8@opiNOG,19QHF@sordNOG,COG5236@NOG,KOG2231@euNOG		GO:0006325-chromatin organization(L=4),GO:0006464-cellular protein modification process(L=5),GO:0006996-organelle organization(L=3),GO:0008150-biological_process(L=0),GO:0008152-metabolic process(L=1),GO:0009056-catabolic process(L=2),GO:0009057-macromolecule catabolic process(L=4),GO:0009987-cellular process(L=1),GO:0016043-cellular component organization(L=2),GO:0016567-protein ubiquitination(L…	GO:0005575-cellular_component(L=0),GO:0005622-intracellular(L=3),GO:0005623-cell(L=1),GO:0005634-nucleus(L=5),GO:0005737-cytoplasm(L=4),GO:0005829-cytosol(L=4),GO:0005840-ribosome(L=5),GO:0016020-membrane(L=1),GO:0030529-intracellular ribonucleoprotein complex(L=4),GO:0032991-macromolecular complex(L=1),GO:0043226-organelle(L=1),GO:0043227-membrane-bounded organelle(L=2),GO:0043228-non-membrane-b…	GO:0003674-molecular_function(L=0),GO:0003676-nucleic acid binding(L=3),GO:0003677-DNA binding(L=4),GO:0003824-catalytic activity(L=1),GO:0004842-ubiquitin-protein transferase activity(L=4),GO:0005488-binding(L=1),GO:0008270-zinc ion binding(L=6),GO:0016874-ligase activity(L=2),GO:0016879-ligase activity, forming carbon-nitrogen bonds(L=3),GO:0016881-acid-amino acid ligase activity(L=4),GO:001978…
FC072V.10426.1	Complete	KAF5536006.1	99.6	262	1	0	1	262	1	262	1.2e-135	100	KAF5536006.1 UAF30-subunit of RNA polymerase I transcription factor [Fusarium napiforme]	fusarium napiforme	fusarium napiforme;fusarium fujikuroi species complex;fusarium;nectriaceae;hypocreales;hypocreomycetidae;sordariomycetes;sordariomyceta;leotiomyceta;pezizomycotina;saccharomyceta;ascomycota;dikarya;fungi;opisthokonta;eukaryota;cellular organisms;root	/LUSTRE/HOME/uva_dpvrf_1/uva_dpvrf_1_3/annotation/entap_outfiles/similarity_search/DIAMOND/blastp_transcripts_fc072v_final_nr.out	No	Yes							117187.FVEG_05817T0	9.1e-137	491.5	PGUG_05740	Fungi	fuNOG[21]	03RYF@ascNOG,0PNS5@fuNOG,0SANE@hypNOG,13RJ3@opiNOG,19IS0@sordNOG,COG5531@NOG,KOG1946@euNOG		GO:0006139-nucleobase-containing compound metabolic process(L=3),GO:0006351-transcription, DNA-templated(L=5),GO:0006355-regulation of transcription, DNA-templated(L=7),GO:0006356-regulation of transcription from RNA polymerase I promoter(L=8),GO:0006725-cellular aromatic compound metabolic process(L=3),GO:0006807-nitrogen compound metabolic process(L=2),GO:0008150-biological_process(L=0),GO:0008…	GO:0000120-RNA polymerase I transcription factor complex(L=7),GO:0000500-RNA polymerase I upstream activating factor complex(L=8),GO:0005575-cellular_component(L=0),GO:0005622-intracellular(L=3),GO:0005623-cell(L=1),GO:0005634-nucleus(L=5),GO:0005654-nucleoplasm(L=5),GO:0005667-transcription factor complex(L=4),GO:0005730-nucleolus(L=5),GO:0005737-cytoplasm(L=4),GO:0005829-cytosol(L=4),GO:0031974…	GO:0003674-molecular_function(L=0),GO:0003676-nucleic acid binding(L=3),GO:0003677-DNA binding(L=4),GO:0005488-binding(L=1),GO:0097159-organic cyclic compound binding(L=2),GO:1901363-heterocyclic compound binding(L=2),			GO:0005515-protein binding(L=2),		IPR003121(SWIB/MDM2 domain)	Pfam	PF02201(SWIB/MDM2 domain)	2.2e-30
FC072V.10425.1	Complete	KAF5676709.1	100	476	0	0	1	476	95	570	1.9e-274	100	KAF5676709.1 GAP1-general amino acid permease [Fusarium circinatum]	fusarium circinatum	fusarium circinatum;fusarium fujikuroi species complex;fusarium;nectriaceae;hypocreales;hypocreomycetidae;sordariomycetes;sordariomyceta;leotiomyceta;pezizomycotina;saccharomyceta;ascomycota;dikarya;fungi;opisthokonta;eukaryota;cellular organisms;root	/LUSTRE/HOME/uva_dpvrf_1/uva_dpvrf_1_3/annotation/entap_outfiles/similarity_search/DIAMOND/blastp_transcripts_fc072v_final_nr.out	No	Yes							117187.FVEG_11799T0	7.7e-259	897.9	FG09053.1	Eukaryotes	euNOG[57]	0IPGG@euNOG,COG0833@NOG		GO:0000003-reproduction(L=1),GO:0000746-conjugation(L=3),GO:0000747-conjugation with cellular fusion(L=3),GO:0003333-amino acid transmembrane transport(L=6),GO:0006808-regulation of nitrogen utilization(L=3),GO:0006810-transport(L=3),GO:0006811-ion transport(L=4),GO:0006812-cation transport(L=5),GO:0006820-anion transport(L=5),GO:0006865-amino acid transport(L=5),GO:0007049-cell cycle(L=3),GO:000…	GO:0000139-Golgi membrane(L=5),GO:0005575-cellular_component(L=0),GO:0005622-intracellular(L=3),GO:0005623-cell(L=1),GO:0005737-cytoplasm(L=4),GO:0005739-mitochondrion(L=5),GO:0005740-mitochondrial envelope(L=6),GO:0005783-endoplasmic reticulum(L=4),GO:0005794-Golgi apparatus(L=4),GO:0005886-plasma membrane(L=3),GO:0012505-endomembrane system(L=3),GO:0016020-membrane(L=1),GO:0016021-integral comp…	GO:0003674-molecular_function(L=0),GO:0005215-transporter activity(L=1),GO:0005342-organic acid transmembrane transporter activity(L=4),GO:0008324-cation transmembrane transporter activity(L=5),GO:0008509-anion transmembrane transporter activity(L=5),GO:0008514-organic anion transmembrane transporter activity(L=6),GO:0015075-ion transmembrane transporter activity(L=4),GO:0015171-amino acid transm…	GO:0055085-transmembrane transport(L=4),	GO:0016020-membrane(L=1),			IPR004841(Amino acid permease/ SLC12A domain)	Pfam	PF00324(Amino acid permease)	1.2e-115
FC072V.10422.1
FC072V.10420.1	Internal	TKA39835.1	42.9	163	86	1	1	163	127	282	5.3e-25	96.4	TKA39835.1 hypothetical protein B0A55_13497, partial [Friedmanniomyces simplex]	friedmanniomyces simplex	friedmanniomyces simplex;friedmanniomyces;teratosphaeriaceae;capnodiales;dothideomycetidae;dothideomycetes;dothideomyceta;leotiomyceta;pezizomycotina;saccharomyceta;ascomycota;dikarya;fungi;opisthokonta;eukaryota;cellular organisms;root	/LUSTRE/HOME/uva_dpvrf_1/uva_dpvrf_1_3/annotation/entap_outfiles/similarity_search/DIAMOND/blastp_transcripts_fc072v_final_nr.out	No	No							140110.NechaP12612	2.4e-45	187.2		Fungi	fuNOG[21]	04DWZ@ascNOG,0IS99@euNOG,0QE1F@fuNOG,10RCS@NOG,13EWF@opiNOG		GO:0006810-transport(L=3),GO:0008150-biological_process(L=0),GO:0009987-cellular process(L=1),GO:0044699-single-organism process(L=1),GO:0044763-single-organism cellular process(L=2),GO:0044765-single-organism transport(L=3),GO:0051179-localization(L=1),GO:0051234-establishment of localization(L=2),GO:0055085-transmembrane transport(L=4),	GO:0005575-cellular_component(L=0),GO:0005623-cell(L=1),GO:0005886-plasma membrane(L=3),GO:0016020-membrane(L=1),GO:0016021-integral component of membrane(L=4),GO:0031224-intrinsic component of membrane(L=3),GO:0044425-membrane part(L=2),GO:0044464-cell part(L=2),GO:0071944-cell periphery(L=3),	GO:0003674-molecular_function(L=0),GO:0005215-transporter activity(L=1),
FC072V.10421.1	Partial 5 Prime	KAF5661469.1	99.4	490	3	0	1	490	72	561	2.4e-280	100	KAF5661469.1 general amidase [Fusarium circinatum]	fusarium circinatum	fusarium circinatum;fusarium fujikuroi species complex;fusarium;nectriaceae;hypocreales;hypocreomycetidae;sordariomycetes;sordariomyceta;leotiomyceta;pezizomycotina;saccharomyceta;ascomycota;dikarya;fungi;opisthokonta;eukaryota;cellular organisms;root	/LUSTRE/HOME/uva_dpvrf_1/uva_dpvrf_1_3/annotation/entap_outfiles/similarity_search/DIAMOND/blastp_transcripts_fc072v_final_nr.out	No	Yes							5507.FOXG_15338P0	5.6e-273	944.9	FG07612.1	Fungi	fuNOG[21]	03PTD@ascNOG,0PKS2@fuNOG,0SA9T@hypNOG,13AB0@opiNOG,1A368@sordNOG,COG0154@NOG,KOG1212@euNOG	3.3036e+18	GO:0008150-biological_process(L=0),GO:0008152-metabolic process(L=1),		GO:0003674-molecular_function(L=0),GO:0003824-catalytic activity(L=1),GO:0004040-amidase activity(L=5),GO:0016787-hydrolase activity(L=2),GO:0016810-hydrolase activity, acting on carbon-nitrogen (but not peptide) bonds(L=3),GO:0016811-hydrolase activity, acting on carbon-nitrogen (but not peptide) bonds, in linear amides(L=4),GO:0016874-ligase activity(L=2),GO:0016879-ligase activity, forming car…				KEGG: 00970+6.3.5.7	IPR023631(Amidase signature domain)	Pfam	PF01425(Amidase)	2.9e-91
FC072V.10417.1	Complete	KAF5661465.1	100	321	0	0	1	321	1	321	4.1e-183	100	KAF5661465.1 5' 3' nucleotidase [Fusarium circinatum]	fusarium circinatum	fusarium circinatum;fusarium fujikuroi species complex;fusarium;nectriaceae;hypocreales;hypocreomycetidae;sordariomycetes;sordariomyceta;leotiomyceta;pezizomycotina;saccharomyceta;ascomycota;dikarya;fungi;opisthokonta;eukaryota;cellular organisms;root	/LUSTRE/HOME/uva_dpvrf_1/uva_dpvrf_1_3/annotation/entap_outfiles/similarity_search/DIAMOND/blastp_transcripts_fc072v_final_nr.out	No	Yes							117187.FVEG_12673T0	1e-182	644.4	FG07608.1	Fungi	fuNOG[21]	03QJB@ascNOG,0IKDK@euNOG,0PM92@fuNOG,0SIQX@hypNOG,0WTWC@necNOG,13KDU@opiNOG,1A31B@sordNOG,COG0496@NOG	2.30241e+16	GO:0006793-phosphorus metabolic process(L=3),GO:0006796-phosphate-containing compound metabolic process(L=4),GO:0008150-biological_process(L=0),GO:0008152-metabolic process(L=1),GO:0009987-cellular process(L=1),GO:0016311-dephosphorylation(L=5),GO:0044237-cellular metabolic process(L=2),	GO:0005575-cellular_component(L=0),GO:0005576-extracellular region(L=1),	GO:0003674-molecular_function(L=0),GO:0003824-catalytic activity(L=1),GO:0003993-acid phosphatase activity(L=6),GO:0005488-binding(L=1),GO:0016787-hydrolase activity(L=2),GO:0016788-hydrolase activity, acting on ester bonds(L=3),GO:0016791-phosphatase activity(L=5),GO:0042578-phosphoric ester hydrolase activity(L=4),GO:0043167-ion binding(L=2),GO:0043169-cation binding(L=3),GO:0046872-metal ion b…			GO:0016787-hydrolase activity(L=2),	KEGG: 00230+3.1.3.5|KEGG: 00240+3.1.3.5|KEGG: 00760+3.1.3.5|MetaCyc: PWY-5381|MetaCyc: PWY-5695|MetaCyc: PWY-6596|MetaCyc: PWY-6606|MetaCyc: PWY-6607|MetaCyc: PWY-6608|MetaCyc: PWY-7185|MetaCyc: PWY-7821	IPR002828(Survival protein SurE-like phosphatase/nucleotidase)	Pfam	PF01975(Survival protein SurE)	2.5e-41
FC072V.10413.1	Internal	KAF5608264.1	96.8	190	6	0	1	190	28	217	9e-106	100	KAF5608264.1 hypothetical protein FSUBG_4800 [Fusarium subglutinans]	fusarium subglutinans	fusarium subglutinans;fusarium fujikuroi species complex;fusarium;nectriaceae;hypocreales;hypocreomycetidae;sordariomycetes;sordariomyceta;leotiomyceta;pezizomycotina;saccharomyceta;ascomycota;dikarya;fungi;opisthokonta;eukaryota;cellular organisms;root	/LUSTRE/HOME/uva_dpvrf_1/uva_dpvrf_1_3/annotation/entap_outfiles/similarity_search/DIAMOND/blastp_transcripts_fc072v_final_nr.out	No	No							5507.FOXG_15343P0	1.8e-33	147.9		Fungi	fuNOG[21]	049HK@ascNOG,0KPUG@euNOG,0QB74@fuNOG,0SK7V@hypNOG,10W6Q@NOG,13676@opiNOG,1A6VD@sordNOG
FC072V.10410.1
FC072V.10409.1	Complete	KAF5604962.1	99.5	184	1	0	1	184	1	184	4.1e-95	100	KAF5604962.1 hypothetical protein FSUBG_6691 [Fusarium subglutinans]	fusarium subglutinans	fusarium subglutinans;fusarium fujikuroi species complex;fusarium;nectriaceae;hypocreales;hypocreomycetidae;sordariomycetes;sordariomyceta;leotiomyceta;pezizomycotina;saccharomyceta;ascomycota;dikarya;fungi;opisthokonta;eukaryota;cellular organisms;root	/LUSTRE/HOME/uva_dpvrf_1/uva_dpvrf_1_3/annotation/entap_outfiles/similarity_search/DIAMOND/blastp_transcripts_fc072v_final_nr.out	No	No							117187.FVEG_11309T0	3.8e-97	359.4		Fungi	fuNOG[21]	03T6W@ascNOG,0IZCD@euNOG,0PQ9V@fuNOG,0SBMH@hypNOG,0WZPR@necNOG,11S0Y@NOG,13TS3@opiNOG,19RBV@sordNOG									IPR027915(Protein of unknown function DUF4452)	Pfam	PF14618(Domain of unknown function (DUF4452))	1.9e-80
FC072V.10408.1	Complete	CVK96494.1	96.2	1011	20	2	1	1011	1	993	0	96.5	CVK96494.1 related to WD repeat-containing protein 48 [Fusarium proliferatum]	fusarium proliferatum	fusarium proliferatum;fusarium fujikuroi species complex;fusarium;nectriaceae;hypocreales;hypocreomycetidae;sordariomycetes;sordariomyceta;leotiomyceta;pezizomycotina;saccharomyceta;ascomycota;dikarya;fungi;opisthokonta;eukaryota;cellular organisms;root	/LUSTRE/HOME/uva_dpvrf_1/uva_dpvrf_1_3/annotation/entap_outfiles/similarity_search/DIAMOND/blastp_transcripts_fc072v_final_nr.out	No	Yes							5507.FOXG_13885P0	0	1884.8	PGUG_02764	Fungi	fuNOG[21]	03K6U@ascNOG,0PGH2@fuNOG,0SG9R@hypNOG,0XRJ5@NOG,12PDP@opiNOG,19JU6@sordNOG,KOG0308@euNOG	3460	GO:0006464-cellular protein modification process(L=5),GO:0006468-protein phosphorylation(L=6),GO:0006793-phosphorus metabolic process(L=3),GO:0006796-phosphate-containing compound metabolic process(L=4),GO:0006810-transport(L=3),GO:0008104-protein localization(L=3),GO:0008150-biological_process(L=0),GO:0008152-metabolic process(L=1),GO:0009987-cellular process(L=1),GO:0010952-positive regulation …	GO:0005575-cellular_component(L=0),GO:0005622-intracellular(L=3),GO:0005623-cell(L=1),GO:0005737-cytoplasm(L=4),GO:0005829-cytosol(L=4),GO:0005938-cell cortex(L=5),GO:0016020-membrane(L=1),GO:0016021-integral component of membrane(L=4),GO:0030428-cell septum(L=3),GO:0031224-intrinsic component of membrane(L=3),GO:0032153-cell division site(L=3),GO:0032991-macromolecular complex(L=1),GO:0043234-pr…	GO:0000166-nucleotide binding(L=3),GO:0001882-nucleoside binding(L=3),GO:0001883-purine nucleoside binding(L=4),GO:0003674-molecular_function(L=0),GO:0003824-catalytic activity(L=1),GO:0004672-protein kinase activity(L=5),GO:0004674-protein serine/threonine kinase activity(L=6),GO:0005488-binding(L=1),GO:0005515-protein binding(L=2),GO:0005524-ATP binding(L=7),GO:0008080-N-acetyltransferase activ…				Reactome: R-HSA-110314|Reactome: R-HSA-5689880|Reactome: R-HSA-6783310	IPR021772(WDR48/Bun107)	Pfam	PF11816(Domain of unknown function (DUF3337))	2.1e-54
FC072V.10404.1	Partial 3 Prime	KAF5964543.1	93.9	115	7	0	1	115	1	115	3.3e-42	76.2	KAF5964543.1 hypothetical protein FBULB1_12717, partial [Fusarium bulbicola]	fusarium bulbicola	fusarium bulbicola;fusarium fujikuroi species complex;fusarium;nectriaceae;hypocreales;hypocreomycetidae;sordariomycetes;sordariomyceta;leotiomyceta;pezizomycotina;saccharomyceta;ascomycota;dikarya;fungi;opisthokonta;eukaryota;cellular organisms;root	/LUSTRE/HOME/uva_dpvrf_1/uva_dpvrf_1_3/annotation/entap_outfiles/similarity_search/DIAMOND/blastp_transcripts_fc072v_final_nr.out	No	No							117187.FVEG_11314T0	4.1e-65	252.7	FG04349.1	Fungi	fuNOG[21]	03QQ0@ascNOG,0PI14@fuNOG,0SCE2@hypNOG,0WXQX@necNOG,0XZYE@NOG,12PDC@opiNOG,19MWW@sordNOG,KOG1676@euNOG			GO:0005575-cellular_component(L=0),GO:0005622-intracellular(L=3),GO:0005623-cell(L=1),GO:0005634-nucleus(L=5),GO:0043226-organelle(L=1),GO:0043227-membrane-bounded organelle(L=2),GO:0043229-intracellular organelle(L=3),GO:0043231-intracellular membrane-bounded organelle(L=4),GO:0044424-intracellular part(L=3),GO:0044464-cell part(L=2),	GO:0003674-molecular_function(L=0),GO:0003676-nucleic acid binding(L=3),GO:0003723-RNA binding(L=4),GO:0005488-binding(L=1),GO:0097159-organic cyclic compound binding(L=2),GO:1901363-heterocyclic compound binding(L=2),
FC072V.10401.1	Internal	XP_018254874.1	53.9	102	37	2	63	154	43	144	5.2e-19	59.7	XP_018254874.1 hypothetical protein FOXG_21806 [Fusarium oxysporum f. sp. lycopersici 4287]	fusarium oxysporum f. sp. lycopersici 4287	fusarium oxysporum f. sp. lycopersici 4287;fusarium oxysporum f. sp. lycopersici;fusarium oxysporum;fusarium oxysporum species complex;fusarium;nectriaceae;hypocreales;hypocreomycetidae;sordariomycetes;sordariomyceta;leotiomyceta;pezizomycotina;saccharomyceta;ascomycota;dikarya;fungi;opisthokonta;eukaryota;cellular organisms;root	/LUSTRE/HOME/uva_dpvrf_1/uva_dpvrf_1_3/annotation/entap_outfiles/similarity_search/DIAMOND/blastp_transcripts_fc072v_final_nr.out	No	No							5507.FOXG_16932P0	1.6e-64	250.8	CNHHK6	Eukaryotes	euNOG[57]	0IVME@euNOG,COG2203@NOG		GO:0000160-phosphorelay signal transduction system(L=5),GO:0006355-regulation of transcription, DNA-templated(L=7),GO:0006464-cellular protein modification process(L=5),GO:0006468-protein phosphorylation(L=6),GO:0006793-phosphorus metabolic process(L=3),GO:0006796-phosphate-containing compound metabolic process(L=4),GO:0007154-cell communication(L=2),GO:0007165-signal transduction(L=3),GO:0008150…	GO:0005575-cellular_component(L=0),GO:0016020-membrane(L=1),	GO:0000155-phosphorelay sensor kinase activity(L=3),GO:0000156-phosphorelay response regulator activity(L=2),GO:0000166-nucleotide binding(L=3),GO:0001882-nucleoside binding(L=3),GO:0001883-purine nucleoside binding(L=4),GO:0003674-molecular_function(L=0),GO:0003824-catalytic activity(L=1),GO:0004672-protein kinase activity(L=5),GO:0004673-protein histidine kinase activity(L=5),GO:0004871-signal …
FC072V.10399.1
FC072V.10398.1
FC072V.10395.1
FC072V.10393.1	Complete	KAF5681508.1	100	777	0	0	1	777	1	777	0	100	KAF5681508.1 catalase-peroxidase 2 [Fusarium circinatum]	fusarium circinatum	fusarium circinatum;fusarium fujikuroi species complex;fusarium;nectriaceae;hypocreales;hypocreomycetidae;sordariomycetes;sordariomyceta;leotiomyceta;pezizomycotina;saccharomyceta;ascomycota;dikarya;fungi;opisthokonta;eukaryota;cellular organisms;root	/LUSTRE/HOME/uva_dpvrf_1/uva_dpvrf_1_3/annotation/entap_outfiles/similarity_search/DIAMOND/blastp_transcripts_fc072v_final_nr.out	No	Yes							5507.FOXG_17180P0	0	1566.6	FG03850.1	Fungi	fuNOG[21]	03QQG@ascNOG,0IQVJ@euNOG,0PMRS@fuNOG,0SDBN@hypNOG,12SIV@opiNOG,19JCE@sordNOG,COG0376@NOG	3603809401100	GO:0000302-response to reactive oxygen species(L=4),GO:0006950-response to stress(L=2),GO:0006979-response to oxidative stress(L=3),GO:0008150-biological_process(L=0),GO:0008152-metabolic process(L=1),GO:0009056-catabolic process(L=2),GO:0009987-cellular process(L=1),GO:0010035-response to inorganic substance(L=3),GO:0033554-cellular response to stress(L=3),GO:0034599-cellular response to oxidati…	GO:0005575-cellular_component(L=0),GO:0005576-extracellular region(L=1),GO:0005622-intracellular(L=3),GO:0005623-cell(L=1),GO:0005737-cytoplasm(L=4),GO:0044424-intracellular part(L=3),GO:0044464-cell part(L=2),	GO:0003674-molecular_function(L=0),GO:0003824-catalytic activity(L=1),GO:0004096-catalase activity(L=3),GO:0004601-peroxidase activity(L=2),GO:0005488-binding(L=1),GO:0005506-iron ion binding(L=6),GO:0009055-electron carrier activity(L=1),GO:0016209-antioxidant activity(L=1),GO:0016491-oxidoreductase activity(L=2),GO:0016684-oxidoreductase activity, acting on peroxide as acceptor(L=3),GO:0016705-…	GO:0006979-response to oxidative stress(L=3),GO:0055114-oxidation-reduction process(L=3),		GO:0004601-peroxidase activity(L=2),GO:0020037-heme binding(L=4),		IPR002016(Haem peroxidase)	Pfam	PF00141(Peroxidase)	2.4e-47
FC072V.10392.1	Complete	KAF5656973.1	99.7	392	1	0	1	392	1	392	6.6e-220	100	KAF5656973.1 hypothetical protein FCIRC_13407 [Fusarium circinatum]	fusarium circinatum	fusarium circinatum;fusarium fujikuroi species complex;fusarium;nectriaceae;hypocreales;hypocreomycetidae;sordariomycetes;sordariomyceta;leotiomyceta;pezizomycotina;saccharomyceta;ascomycota;dikarya;fungi;opisthokonta;eukaryota;cellular organisms;root	/LUSTRE/HOME/uva_dpvrf_1/uva_dpvrf_1_3/annotation/entap_outfiles/similarity_search/DIAMOND/blastp_transcripts_fc072v_final_nr.out	No	No							117187.FVEG_08402T0	1.5e-180	637.5		Fungi	fuNOG[21]	03WWT@ascNOG,0PUPV@fuNOG,0SFI2@hypNOG,0XNV7@NOG,140KX@opiNOG,1A4TZ@sordNOG,KOG1339@euNOG		GO:0006508-proteolysis(L=4),GO:0008150-biological_process(L=0),GO:0008152-metabolic process(L=1),GO:0019538-protein metabolic process(L=3),GO:0043170-macromolecule metabolic process(L=3),GO:0044238-primary metabolic process(L=2),GO:0071704-organic substance metabolic process(L=2),		GO:0003674-molecular_function(L=0),GO:0003824-catalytic activity(L=1),GO:0004175-endopeptidase activity(L=5),GO:0004190-aspartic-type endopeptidase activity(L=6),GO:0008233-peptidase activity(L=3),GO:0016787-hydrolase activity(L=2),GO:0070001-aspartic-type peptidase activity(L=5),GO:0070011-peptidase activity, acting on L-amino acid peptides(L=4),					IPR033121(Peptidase family A1 domain)	Pfam	PF00026(Eukaryotic aspartyl protease)	2.8e-60
FC072V.10387.1	Complete	KAF5656979.1	100	357	0	0	1	357	1	357	1.6e-201	100	KAF5656979.1 NADPH2:quinone reductase [Fusarium circinatum]	fusarium circinatum	fusarium circinatum;fusarium fujikuroi species complex;fusarium;nectriaceae;hypocreales;hypocreomycetidae;sordariomycetes;sordariomyceta;leotiomyceta;pezizomycotina;saccharomyceta;ascomycota;dikarya;fungi;opisthokonta;eukaryota;cellular organisms;root	/LUSTRE/HOME/uva_dpvrf_1/uva_dpvrf_1_3/annotation/entap_outfiles/similarity_search/DIAMOND/blastp_transcripts_fc072v_final_nr.out	No	Yes							117187.FVEG_08409T0	2.4e-196	689.9	FG03175.1	Fungi	fuNOG[21]	03QRI@ascNOG,0PJRZ@fuNOG,0SFB3@hypNOG,0X04C@necNOG,13N1E@opiNOG,1A60T@sordNOG,COG0604@NOG,KOG1198@euNOG		GO:0008150-biological_process(L=0),GO:0008152-metabolic process(L=1),GO:0044710-single-organism metabolic process(L=2),GO:0055114-oxidation-reduction process(L=3),		GO:0003674-molecular_function(L=0),GO:0003824-catalytic activity(L=1),GO:0005488-binding(L=1),GO:0008270-zinc ion binding(L=6),GO:0016491-oxidoreductase activity(L=2),GO:0043167-ion binding(L=2),GO:0043169-cation binding(L=3),GO:0046872-metal ion binding(L=4),GO:0046914-transition metal ion binding(L=5),
FC072V.10383.1	Partial 5 Prime	KAF5558971.1	96.5	113	4	0	19	131	1	113	5.5e-54	86.3	KAF5558971.1 hypothetical protein FMEXI_166 [Fusarium mexicanum]	fusarium mexicanum	fusarium mexicanum;fusarium fujikuroi species complex;fusarium;nectriaceae;hypocreales;hypocreomycetidae;sordariomycetes;sordariomyceta;leotiomyceta;pezizomycotina;saccharomyceta;ascomycota;dikarya;fungi;opisthokonta;eukaryota;cellular organisms;root	/LUSTRE/HOME/uva_dpvrf_1/uva_dpvrf_1_3/annotation/entap_outfiles/similarity_search/DIAMOND/blastp_transcripts_fc072v_final_nr.out	No	No							5507.FOXG_10078P0	7.7e-36	155.2	FG03185.1	Fungi	fuNOG[21]	04BJ4@ascNOG,0KNAF@euNOG,0Q985@fuNOG,0SM35@hypNOG,10XNI@NOG,1386E@opiNOG,1A2QP@sordNOG
FC072V.10382.1	Partial 5 Prime	KLP21547.1	96.8	158	5	0	1	158	102	259	2.3e-83	100	KLP21547.1 C6 finger domain protein [Fusarium fujikuroi]	fusarium fujikuroi	fusarium fujikuroi;fusarium fujikuroi species complex;fusarium;nectriaceae;hypocreales;hypocreomycetidae;sordariomycetes;sordariomyceta;leotiomyceta;pezizomycotina;saccharomyceta;ascomycota;dikarya;fungi;opisthokonta;eukaryota;cellular organisms;root	/LUSTRE/HOME/uva_dpvrf_1/uva_dpvrf_1_3/annotation/entap_outfiles/similarity_search/DIAMOND/blastp_transcripts_fc072v_final_nr.out	No	Yes							229533.XP_383363.1	6.7e-42	175.6		Fungi	fuNOG[21]	03RI9@ascNOG,0IWC6@euNOG,0PNEC@fuNOG,0SN7F@hypNOG,0WYQ6@necNOG,11N2U@NOG,13QYW@opiNOG,1A22A@sordNOG		GO:0006139-nucleobase-containing compound metabolic process(L=3),GO:0006351-transcription, DNA-templated(L=5),GO:0006355-regulation of transcription, DNA-templated(L=7),GO:0006357-regulation of transcription from RNA polymerase II promoter(L=8),GO:0006366-transcription from RNA polymerase II promoter(L=6),GO:0006725-cellular aromatic compound metabolic process(L=3),GO:0006807-nitrogen compound me…	GO:0005575-cellular_component(L=0),GO:0005622-intracellular(L=3),GO:0005623-cell(L=1),GO:0005634-nucleus(L=5),GO:0043226-organelle(L=1),GO:0043227-membrane-bounded organelle(L=2),GO:0043229-intracellular organelle(L=3),GO:0043231-intracellular membrane-bounded organelle(L=4),GO:0044424-intracellular part(L=3),GO:0044464-cell part(L=2),	GO:0000981-RNA polymerase II transcription factor activity, sequence-specific DNA binding(L=3),GO:0001071-nucleic acid binding transcription factor activity(L=1),GO:0003674-molecular_function(L=0),GO:0003676-nucleic acid binding(L=3),GO:0003677-DNA binding(L=4),GO:0003700-transcription factor activity, sequence-specific DNA binding(L=2),GO:0003824-catalytic activity(L=1),GO:0005488-binding(L=1),G…
FC072V.10381.1	Partial 5 Prime	KAF5656993.1	99.1	643	6	0	11	653	1	643	0	98.5	KAF5656993.1 isoamyl alcohol oxidase [Fusarium circinatum]	fusarium circinatum	fusarium circinatum;fusarium fujikuroi species complex;fusarium;nectriaceae;hypocreales;hypocreomycetidae;sordariomycetes;sordariomyceta;leotiomyceta;pezizomycotina;saccharomyceta;ascomycota;dikarya;fungi;opisthokonta;eukaryota;cellular organisms;root	/LUSTRE/HOME/uva_dpvrf_1/uva_dpvrf_1_3/annotation/entap_outfiles/similarity_search/DIAMOND/blastp_transcripts_fc072v_final_nr.out	No	Yes							117187.FVEG_08422T0	0	1208.7	FG07808.1	Fungi	fuNOG[21]	03KJD@ascNOG,0IEVN@euNOG,0PJ81@fuNOG,0SIVY@hypNOG,0WTVY@necNOG,12CFH@NOG,12T04@opiNOG,19KPM@sordNOG		GO:0008150-biological_process(L=0),GO:0008152-metabolic process(L=1),GO:0044710-single-organism metabolic process(L=2),GO:0055114-oxidation-reduction process(L=3),		GO:0000166-nucleotide binding(L=3),GO:0003674-molecular_function(L=0),GO:0003824-catalytic activity(L=1),GO:0005488-binding(L=1),GO:0008762-UDP-N-acetylmuramate dehydrogenase activity(L=5),GO:0016491-oxidoreductase activity(L=2),GO:0016614-oxidoreductase activity, acting on CH-OH group of donors(L=3),GO:0016616-oxidoreductase activity, acting on the CH-OH group of donors, NAD or NADP as acceptor(…	GO:0055114-oxidation-reduction process(L=3),		GO:0016491-oxidoreductase activity(L=2),GO:0050660-flavin adenine dinucleotide binding(L=4),		IPR006094(FAD linked oxidase, N-terminal)	Pfam	PF01565(FAD binding domain)	1e-23
FC072V.10378.1	Complete	KAF5717247.1	99.3	137	1	0	1	137	1	137	1e-71	100	KAF5717247.1 ethanolamine utilization [Fusarium mundagurra]	fusarium mundagurra	fusarium mundagurra;fusarium fujikuroi species complex;fusarium;nectriaceae;hypocreales;hypocreomycetidae;sordariomycetes;sordariomyceta;leotiomyceta;pezizomycotina;saccharomyceta;ascomycota;dikarya;fungi;opisthokonta;eukaryota;cellular organisms;root	/LUSTRE/HOME/uva_dpvrf_1/uva_dpvrf_1_3/annotation/entap_outfiles/similarity_search/DIAMOND/blastp_transcripts_fc072v_final_nr.out	No	Yes							5507.FOXG_10068P0	4.7e-68	262.3		Fungi	fuNOG[21]	049VZ@ascNOG,0KPJ0@euNOG,0QAV4@fuNOG,0SKBW@hypNOG,10WG1@NOG,136JA@opiNOG,1A64X@sordNOG								KEGG: 00230+3.5.3.26|MetaCyc: PWY-5692|MetaCyc: PWY-5698	IPR008579(Domain of unknown function DUF861, cupin-3)	Pfam	PF05899(Protein of unknown function (DUF861))	3e-06
FC072V.10376.1	Complete	KAF5657007.1	100	489	0	0	1	489	1	489	3.4e-290	100	KAF5657007.1 isotrichodermin C-15 hydroxylase (cytochrome P-450 monooxygenase CYP65A1) [Fusarium circinatum]	fusarium circinatum	fusarium circinatum;fusarium fujikuroi species complex;fusarium;nectriaceae;hypocreales;hypocreomycetidae;sordariomycetes;sordariomyceta;leotiomyceta;pezizomycotina;saccharomyceta;ascomycota;dikarya;fungi;opisthokonta;eukaryota;cellular organisms;root	/LUSTRE/HOME/uva_dpvrf_1/uva_dpvrf_1_3/annotation/entap_outfiles/similarity_search/DIAMOND/blastp_transcripts_fc072v_final_nr.out	No	Yes							117187.FVEG_08438T0	3.4e-286	988.8	FG03191.1	Fungi	fuNOG[21]	03QW1@ascNOG,0PJ01@fuNOG,0SHTM@hypNOG,13MV2@opiNOG,19K0B@sordNOG,COG2124@NOG,KOG0158@euNOG		GO:0008150-biological_process(L=0),GO:0008152-metabolic process(L=1),GO:0044710-single-organism metabolic process(L=2),GO:0055114-oxidation-reduction process(L=3),		GO:0003674-molecular_function(L=0),GO:0003824-catalytic activity(L=1),GO:0004497-monooxygenase activity(L=3),GO:0005488-binding(L=1),GO:0005506-iron ion binding(L=6),GO:0009055-electron carrier activity(L=1),GO:0016491-oxidoreductase activity(L=2),GO:0016705-oxidoreductase activity, acting on paired donors, with incorporation or reduction of molecular oxygen(L=3),GO:0020037-heme binding(L=4),GO:0…	GO:0055114-oxidation-reduction process(L=3),		GO:0005506-iron ion binding(L=6),GO:0016705-oxidoreductase activity, acting on paired donors, with incorporation or reduction of molecular oxygen(L=3),GO:0020037-heme binding(L=4),		IPR001128(Cytochrome P450)	Pfam	PF00067(Cytochrome P450)	1.5e-69
FC072V.10365.3	Complete
FC072V.10365.2	Complete
FC072V.10365.1	Complete
FC072V.10366.1
FC072V.10367.1	Partial 5 Prime	XP_031069931.1	96.5	229	8	0	1	229	161	389	2.3e-111	100	XP_031069931.1 uncharacterized protein FOIG_02760 [Fusarium odoratissimum NRRL 54006]	fusarium odoratissimum nrrl 54006	fusarium odoratissimum;fusarium oxysporum species complex;fusarium;nectriaceae;hypocreales;hypocreomycetidae;sordariomycetes;sordariomyceta;leotiomyceta;pezizomycotina;saccharomyceta;ascomycota;dikarya;fungi;opisthokonta;eukaryota;cellular organisms;root	/LUSTRE/HOME/uva_dpvrf_1/uva_dpvrf_1_3/annotation/entap_outfiles/similarity_search/DIAMOND/blastp_transcripts_fc072v_final_nr.out	No	No							117187.FVEG_07878T0	6.1e-113	412.1		Fungi	fuNOG[21]	049XT@ascNOG,0KPHD@euNOG,0QATB@fuNOG,0SDQE@hypNOG,10WHM@NOG,136M5@opiNOG,1A61J@sordNOG
FC072V.10369.1	Partial 5 Prime	KAF4445150.1	98.3	713	12	0	11	723	1	713	0	98.6	KAF4445150.1 NAD+ synthase (glutamine-hydrolysing) [Fusarium acutatum]	fusarium acutatum	fusarium acutatum;fusarium fujikuroi species complex;fusarium;nectriaceae;hypocreales;hypocreomycetidae;sordariomycetes;sordariomyceta;leotiomyceta;pezizomycotina;saccharomyceta;ascomycota;dikarya;fungi;opisthokonta;eukaryota;cellular organisms;root	/LUSTRE/HOME/uva_dpvrf_1/uva_dpvrf_1_3/annotation/entap_outfiles/similarity_search/DIAMOND/blastp_transcripts_fc072v_final_nr.out	No	Yes							5507.FOXG_01512P0	0	1379	QNS1	Fungi	fuNOG[21]	03KWI@ascNOG,0PGZM@fuNOG,0SB8Q@hypNOG,12N16@opiNOG,19KV6@sordNOG,COG0171@NOG,COG0388@NOG,KOG2303@euNOG	7601100	GO:0006139-nucleobase-containing compound metabolic process(L=3),GO:0006725-cellular aromatic compound metabolic process(L=3),GO:0006732-coenzyme metabolic process(L=4),GO:0006733-oxidoreduction coenzyme metabolic process(L=5),GO:0006753-nucleoside phosphate metabolic process(L=4),GO:0006793-phosphorus metabolic process(L=3),GO:0006796-phosphate-containing compound metabolic process(L=4),GO:00068…	GO:0005575-cellular_component(L=0),GO:0005622-intracellular(L=3),GO:0005623-cell(L=1),GO:0005634-nucleus(L=5),GO:0005737-cytoplasm(L=4),GO:0005829-cytosol(L=4),GO:0043226-organelle(L=1),GO:0043227-membrane-bounded organelle(L=2),GO:0043229-intracellular organelle(L=3),GO:0043231-intracellular membrane-bounded organelle(L=4),GO:0044424-intracellular part(L=3),GO:0044444-cytoplasmic part(L=4),GO:00…	GO:0000166-nucleotide binding(L=3),GO:0001882-nucleoside binding(L=3),GO:0001883-purine nucleoside binding(L=4),GO:0003674-molecular_function(L=0),GO:0003824-catalytic activity(L=1),GO:0003952-NAD+ synthase (glutamine-hydrolyzing) activity(L=5),GO:0005488-binding(L=1),GO:0005524-ATP binding(L=7),GO:0016787-hydrolase activity(L=2),GO:0016810-hydrolase activity, acting on carbon-nitrogen (but not p…	GO:0006807-nitrogen compound metabolic process(L=2),				IPR003010(Carbon-nitrogen hydrolase)	Pfam	PF00795(Carbon-nitrogen hydrolase)	2.7e-32
FC072V.10364.1	Complete	KAF5673247.1	99.6	450	2	0	1	450	1	450	1.5e-252	100	KAF5673247.1 nuclear ES2 [Fusarium circinatum]	fusarium circinatum	fusarium circinatum;fusarium fujikuroi species complex;fusarium;nectriaceae;hypocreales;hypocreomycetidae;sordariomycetes;sordariomyceta;leotiomyceta;pezizomycotina;saccharomyceta;ascomycota;dikarya;fungi;opisthokonta;eukaryota;cellular organisms;root	/LUSTRE/HOME/uva_dpvrf_1/uva_dpvrf_1_3/annotation/entap_outfiles/similarity_search/DIAMOND/blastp_transcripts_fc072v_final_nr.out	No	Yes							140110.NechaP48935	9.9e-208	728	FG07396.1	Fungi	fuNOG[21]	03NCA@ascNOG,0PJD2@fuNOG,0SD8P@hypNOG,0WZCE@necNOG,0YVA8@NOG,12QGT@opiNOG,19KTC@sordNOG,KOG2627@euNOG									IPR019148(Nuclear protein DGCR14/ESS-2)	Pfam	PF09751(Nuclear protein Es2)	4.6e-118
FC072V.10363.1
FC072V.10361.1
FC072V.10355.1
FC072V.10354.1
FC072V.10353.1	Complete	KAF5698809.1	98.7	153	2	0	1	153	1	153	7.8e-76	100	KAF5698809.1 life-span regulatory factor domain-containing protein [Fusarium globosum]	fusarium globosum	fusarium globosum;fusarium fujikuroi species complex;fusarium;nectriaceae;hypocreales;hypocreomycetidae;sordariomycetes;sordariomyceta;leotiomyceta;pezizomycotina;saccharomyceta;ascomycota;dikarya;fungi;opisthokonta;eukaryota;cellular organisms;root	/LUSTRE/HOME/uva_dpvrf_1/uva_dpvrf_1_3/annotation/entap_outfiles/similarity_search/DIAMOND/blastp_transcripts_fc072v_final_nr.out	No	Yes							117187.FVEG_04859T0	7.3e-78	295	FG05186.1	Fungi	fuNOG[21]	03V6J@ascNOG,0J4KE@euNOG,0PSAP@fuNOG,0SC3W@hypNOG,0X0CD@necNOG,0Y7NN@NOG,13XGS@opiNOG,19T5D@sordNOG		GO:0007275-multicellular organism development(L=3),GO:0008150-biological_process(L=0),GO:0032501-multicellular organismal process(L=1),GO:0032502-developmental process(L=1),GO:0043581-obsolete mycelium development(L=),GO:0044699-single-organism process(L=1),GO:0044707-single-multicellular organism process(L=2),GO:0044767-single-organism developmental process(L=2),GO:0048856-anatomical structure d…							IPR024368(Zinc binding protein Ecl1/2/3)	Pfam	PF12855(ECL1/2/3 zinc binding proteins)	1.1e-13
FC072V.10352.1
FC072V.10360.1
FC072V.10359.1	Partial 5 Prime	CRK21258.1	50.1	363	164	6	23	368	117	479	3.9e-77	83.2	CRK21258.1 hypothetical protein BN1723_017910, partial [Verticillium longisporum]	verticillium longisporum	verticillium longisporum;verticillium;plectosphaerellaceae;glomerellales;hypocreomycetidae;sordariomycetes;sordariomyceta;leotiomyceta;pezizomycotina;saccharomyceta;ascomycota;dikarya;fungi;opisthokonta;eukaryota;cellular organisms;root	/LUSTRE/HOME/uva_dpvrf_1/uva_dpvrf_1_3/annotation/entap_outfiles/similarity_search/DIAMOND/blastp_transcripts_fc072v_final_nr.out	No	No							5507.FOXG_07944P0	7.2e-221	771.5	CNHHK6	Ancestor	NOG[107]	COG2203@NOG		GO:0000160-phosphorelay signal transduction system(L=5),GO:0006139-nucleobase-containing compound metabolic process(L=3),GO:0006351-transcription, DNA-templated(L=5),GO:0006355-regulation of transcription, DNA-templated(L=7),GO:0006464-cellular protein modification process(L=5),GO:0006468-protein phosphorylation(L=6),GO:0006725-cellular aromatic compound metabolic process(L=3),GO:0006753-nucleosi…	GO:0005575-cellular_component(L=0),GO:0005622-intracellular(L=3),GO:0005623-cell(L=1),GO:0005856-cytoskeleton(L=5),GO:0005886-plasma membrane(L=3),GO:0015629-actin cytoskeleton(L=6),GO:0016020-membrane(L=1),GO:0016021-integral component of membrane(L=4),GO:0016459-myosin complex(L=6),GO:0030288-outer membrane-bounded periplasmic space(L=4),GO:0030312-external encapsulating structure(L=3),GO:00303…	GO:0000155-phosphorelay sensor kinase activity(L=3),GO:0000156-phosphorelay response regulator activity(L=2),GO:0000166-nucleotide binding(L=3),GO:0001071-nucleic acid binding transcription factor activity(L=1),GO:0001882-nucleoside binding(L=3),GO:0001883-purine nucleoside binding(L=4),GO:0003674-molecular_function(L=0),GO:0003676-nucleic acid binding(L=3),GO:0003677-DNA binding(L=4),GO:0003700-…	GO:0007165-signal transduction(L=3),		GO:0000155-phosphorelay sensor kinase activity(L=3),		IPR003661(Signal transduction histidine kinase, dimerisation/phosphoacceptor domain)	Pfam	PF00512(His Kinase A (phospho-acceptor) domain)	7.5e-12
FC072V.10356.1
FC072V.10348.1	Complete	KAF5684104.1	100	421	0	0	1	421	1	421	1.2e-243	100	KAF5684104.1 integral membrane protein [Fusarium circinatum]	fusarium circinatum	fusarium circinatum;fusarium fujikuroi species complex;fusarium;nectriaceae;hypocreales;hypocreomycetidae;sordariomycetes;sordariomyceta;leotiomyceta;pezizomycotina;saccharomyceta;ascomycota;dikarya;fungi;opisthokonta;eukaryota;cellular organisms;root	/LUSTRE/HOME/uva_dpvrf_1/uva_dpvrf_1_3/annotation/entap_outfiles/similarity_search/DIAMOND/blastp_transcripts_fc072v_final_nr.out	No	Yes							117187.FVEG_04863T0	3.7e-241	839	FG05190.1	Fungi	fuNOG[21]	03QA4@ascNOG,0IJH2@euNOG,0PJNV@fuNOG,0SD5M@hypNOG,0WTK6@necNOG,0Y0RI@NOG,13JM7@opiNOG,19NGY@sordNOG									IPR026841(Inositolphosphotransferase Aur1/Ipt1)	Pfam	PF14378(PAP2 superfamily)	5e-27
FC072V.10349.1	Complete	KAF5558310.1	100	317	0	0	1	317	62	378	1.6e-123	100	KAF5558310.1 MAK16 [Fusarium mexicanum]	fusarium mexicanum	fusarium mexicanum;fusarium fujikuroi species complex;fusarium;nectriaceae;hypocreales;hypocreomycetidae;sordariomycetes;sordariomyceta;leotiomyceta;pezizomycotina;saccharomyceta;ascomycota;dikarya;fungi;opisthokonta;eukaryota;cellular organisms;root	/LUSTRE/HOME/uva_dpvrf_1/uva_dpvrf_1_3/annotation/entap_outfiles/similarity_search/DIAMOND/blastp_transcripts_fc072v_final_nr.out	No	Yes							117187.FVEG_04866T0	6.9e-123	445.7	MAK16	Fungi	fuNOG[21]	03JYP@ascNOG,0PH0P@fuNOG,0SF0K@hypNOG,0WUZS@necNOG,12QB4@opiNOG,19PID@sordNOG,COG5129@NOG,KOG3064@euNOG		GO:0000460-maturation of 5.8S rRNA(L=8),GO:0000463-maturation of LSU-rRNA from tricistronic rRNA transcript (SSU-rRNA, 5.8S rRNA, LSU-rRNA)(L=9),GO:0000466-maturation of 5.8S rRNA from tricistronic rRNA transcript (SSU-rRNA, 5.8S rRNA, LSU-rRNA)(L=9),GO:0000470-maturation of LSU-rRNA(L=8),GO:0006139-nucleobase-containing compound metabolic process(L=3),GO:0006364-rRNA processing(L=7),GO:0006396-R…	GO:0005575-cellular_component(L=0),GO:0005622-intracellular(L=3),GO:0005623-cell(L=1),GO:0005634-nucleus(L=5),GO:0005730-nucleolus(L=5),GO:0005737-cytoplasm(L=4),GO:0005829-cytosol(L=4),GO:0030529-intracellular ribonucleoprotein complex(L=4),GO:0030684-preribosome(L=5),GO:0030687-preribosome, large subunit precursor(L=6),GO:0031974-membrane-enclosed lumen(L=1),GO:0031981-nuclear lumen(L=6),GO:003…	GO:0003674-molecular_function(L=0),GO:0003824-catalytic activity(L=1),GO:0016740-transferase activity(L=2),					IPR029004(Ribosomal L28e/Mak16)	Pfam	PF01778(Ribosomal L28e protein family)	1.2e-37
FC072V.10343.1	Partial 5 Prime	KKY34698.1	59.8	510	174	4	1	479	372	881	6.5e-169	99.8	KKY34698.1 putative hypercellular protein a [Diaporthe ampelina]	diaporthe ampelina	diaporthe ampelina;diaporthe;diaporthaceae;diaporthales;sordariomycetidae;sordariomycetes;sordariomyceta;leotiomyceta;pezizomycotina;saccharomyceta;ascomycota;dikarya;fungi;opisthokonta;eukaryota;cellular organisms;root	/LUSTRE/HOME/uva_dpvrf_1/uva_dpvrf_1_3/annotation/entap_outfiles/similarity_search/DIAMOND/blastp_transcripts_fc072v_final_nr.out	No	No							5507.FOXG_07952P0	8.2e-269	931	TRS120	Fungi	fuNOG[21]	04DAH@ascNOG,0QDBC@fuNOG,0SNT6@hypNOG,0YJME@NOG,13B5G@opiNOG,1A737@sordNOG,KOG1953@euNOG		GO:0006140-regulation of nucleotide metabolic process(L=6),GO:0006810-transport(L=3),GO:0006886-intracellular protein transport(L=5),GO:0006888-ER to Golgi vesicle-mediated transport(L=4),GO:0006891-intra-Golgi vesicle-mediated transport(L=6),GO:0007163-establishment or maintenance of cell polarity(L=3),GO:0008104-protein localization(L=3),GO:0008150-biological_process(L=0),GO:0008152-metabolic p…	GO:0000922-spindle pole(L=5),GO:0000935-barrier septum(L=4),GO:0005575-cellular_component(L=0),GO:0005622-intracellular(L=3),GO:0005623-cell(L=1),GO:0005737-cytoplasm(L=4),GO:0005768-endosome(L=5),GO:0005769-early endosome(L=7),GO:0005794-Golgi apparatus(L=4),GO:0005801-cis-Golgi network(L=5),GO:0005802-trans-Golgi network(L=5),GO:0005815-microtubule organizing center(L=6),GO:0005816-spindle pole…	GO:0003674-molecular_function(L=0),GO:0003824-catalytic activity(L=1),GO:0016491-oxidoreductase activity(L=2),				Reactome: R-HSA-204005|Reactome: R-HSA-8876198	IPR013935(TRAPP II complex, Trs120)	Pfam	PF08626(Transport protein Trs120 or TRAPPC9, TRAPP II complex subunit)	1.4e-159
FC072V.10346.1	Complete	XP_031068745.1	98.5	411	6	0	1	411	1	411	2.5e-230	100	XP_031068745.1 uncharacterized protein FOIG_03380 [Fusarium odoratissimum NRRL 54006]	fusarium odoratissimum nrrl 54006	fusarium odoratissimum;fusarium oxysporum species complex;fusarium;nectriaceae;hypocreales;hypocreomycetidae;sordariomycetes;sordariomyceta;leotiomyceta;pezizomycotina;saccharomyceta;ascomycota;dikarya;fungi;opisthokonta;eukaryota;cellular organisms;root	/LUSTRE/HOME/uva_dpvrf_1/uva_dpvrf_1_3/annotation/entap_outfiles/similarity_search/DIAMOND/blastp_transcripts_fc072v_final_nr.out	No	No							117187.FVEG_04870T0	7.9e-212	741.5		Fungi	fuNOG[21]	03MG7@ascNOG,0PII2@fuNOG,0SGE0@hypNOG,13PFA@opiNOG,1A6YV@sordNOG,COG1028@NOG,KOG1205@euNOG		GO:0008150-biological_process(L=0),GO:0008152-metabolic process(L=1),GO:0044710-single-organism metabolic process(L=2),GO:0055114-oxidation-reduction process(L=3),		GO:0003674-molecular_function(L=0),GO:0003824-catalytic activity(L=1),GO:0004745-retinol dehydrogenase activity(L=5),GO:0016491-oxidoreductase activity(L=2),GO:0016614-oxidoreductase activity, acting on CH-OH group of donors(L=3),GO:0016616-oxidoreductase activity, acting on the CH-OH group of donors, NAD or NADP as acceptor(L=4),	GO:0055114-oxidation-reduction process(L=3),				IPR002347(Short-chain dehydrogenase/reductase SDR)	Pfam	PF00106(short chain dehydrogenase)	1.6e-21
FC072V.10342.1	Complete	KAF5558314.1	99.4	531	3	0	1	531	1	531	5e-303	100	KAF5558314.1 quinate transport [Fusarium mexicanum]	fusarium mexicanum	fusarium mexicanum;fusarium fujikuroi species complex;fusarium;nectriaceae;hypocreales;hypocreomycetidae;sordariomycetes;sordariomyceta;leotiomyceta;pezizomycotina;saccharomyceta;ascomycota;dikarya;fungi;opisthokonta;eukaryota;cellular organisms;root	/LUSTRE/HOME/uva_dpvrf_1/uva_dpvrf_1_3/annotation/entap_outfiles/similarity_search/DIAMOND/blastp_transcripts_fc072v_final_nr.out	No	Yes							5507.FOXG_07954P0	2.1e-302	1042.7	FG06235.1	Fungi	fuNOG[21]	03PXR@ascNOG,0PJ3N@fuNOG,0SFWZ@hypNOG,0XNQK@NOG,13HG1@opiNOG,1A4JQ@sordNOG,KOG0254@euNOG		GO:0006810-transport(L=3),GO:0008150-biological_process(L=0),GO:0008643-carbohydrate transport(L=4),GO:0009987-cellular process(L=1),GO:0044699-single-organism process(L=1),GO:0044763-single-organism cellular process(L=2),GO:0044765-single-organism transport(L=3),GO:0051179-localization(L=1),GO:0051234-establishment of localization(L=2),GO:0055085-transmembrane transport(L=4),GO:0071702-organic s…	GO:0005575-cellular_component(L=0),GO:0016020-membrane(L=1),GO:0016021-integral component of membrane(L=4),GO:0031224-intrinsic component of membrane(L=3),GO:0044425-membrane part(L=2),	GO:0003674-molecular_function(L=0),GO:0005215-transporter activity(L=1),GO:0022857-transmembrane transporter activity(L=2),GO:0022891-substrate-specific transmembrane transporter activity(L=3),GO:0022892-substrate-specific transporter activity(L=2),	GO:0055085-transmembrane transport(L=4),	GO:0016021-integral component of membrane(L=4),	GO:0022857-transmembrane transporter activity(L=2),		IPR005828(Major facilitator, sugar transporter-like)	Pfam	PF00083(Sugar (and other) transporter)	1.3e-118
FC072V.10345.1	Complete	KAF5684095.1	100	662	0	0	1	662	1	662	0	100	KAF5684095.1 hypothetical protein FCIRC_4093 [Fusarium circinatum]	fusarium circinatum	fusarium circinatum;fusarium fujikuroi species complex;fusarium;nectriaceae;hypocreales;hypocreomycetidae;sordariomycetes;sordariomyceta;leotiomyceta;pezizomycotina;saccharomyceta;ascomycota;dikarya;fungi;opisthokonta;eukaryota;cellular organisms;root	/LUSTRE/HOME/uva_dpvrf_1/uva_dpvrf_1_3/annotation/entap_outfiles/similarity_search/DIAMOND/blastp_transcripts_fc072v_final_nr.out	No	No							5507.FOXG_07955P0	0	1369.4	FG06234.1	Fungi	fuNOG[21]	03MU4@ascNOG,0IG5B@euNOG,0PIVN@fuNOG,0SC8X@hypNOG,13HTQ@opiNOG,19NWX@sordNOG,COG4289@NOG									IPR016624(Uncharacterised conserved protein UCP014753)	Pfam	PF10022(Uncharacterized protein conserved in bacteria (DUF2264))	8.1e-136
FC072V.10335.1	Complete	KAF5651707.1	97	265	6	1	1	265	1	263	8.6e-139	100	KAF5651707.1 proteasome component C2 [Fusarium tjaetaba]	fusarium tjaetaba	fusarium tjaetaba;fusarium fujikuroi species complex;fusarium;nectriaceae;hypocreales;hypocreomycetidae;sordariomycetes;sordariomyceta;leotiomyceta;pezizomycotina;saccharomyceta;ascomycota;dikarya;fungi;opisthokonta;eukaryota;cellular organisms;root	/LUSTRE/HOME/uva_dpvrf_1/uva_dpvrf_1_3/annotation/entap_outfiles/similarity_search/DIAMOND/blastp_transcripts_fc072v_final_nr.out	No	Yes							117187.FVEG_04879T0	2e-139	500.4	FG05222.1	Fungi	fuNOG[21]	03KD4@ascNOG,0PHF0@fuNOG,0SAQ1@hypNOG,12Q22@opiNOG,19KXM@sordNOG,COG0638@NOG,KOG0863@euNOG	3050	GO:0006508-proteolysis(L=4),GO:0006511-ubiquitin-dependent protein catabolic process(L=8),GO:0007346-regulation of mitotic cell cycle(L=5),GO:0008150-biological_process(L=0),GO:0008152-metabolic process(L=1),GO:0009056-catabolic process(L=2),GO:0009057-macromolecule catabolic process(L=4),GO:0009987-cellular process(L=1),GO:0010498-proteasomal protein catabolic process(L=7),GO:0010499-proteasomal…	GO:0000502-proteasome complex(L=4),GO:0005575-cellular_component(L=0),GO:0005622-intracellular(L=3),GO:0005623-cell(L=1),GO:0005634-nucleus(L=5),GO:0005737-cytoplasm(L=4),GO:0005739-mitochondrion(L=5),GO:0005829-cytosol(L=4),GO:0005839-proteasome core complex(L=4),GO:0012505-endomembrane system(L=3),GO:0016020-membrane(L=1),GO:0019773-proteasome core complex, alpha-subunit complex(L=4),GO:0031597…	GO:0003674-molecular_function(L=0),GO:0003824-catalytic activity(L=1),GO:0004175-endopeptidase activity(L=5),GO:0004298-threonine-type endopeptidase activity(L=6),GO:0008233-peptidase activity(L=3),GO:0016787-hydrolase activity(L=2),GO:0070003-threonine-type peptidase activity(L=5),GO:0070011-peptidase activity, acting on L-amino acid peptides(L=4),	GO:0051603-proteolysis involved in cellular protein catabolic process(L=6),	GO:0005839-proteasome core complex(L=4),		Reactome: R-HSA-1169091|Reactome: R-HSA-1234176|Reactome: R-HSA-1236974|Reactome: R-HSA-1236978|Reactome: R-HSA-174084|Reactome: R-HSA-174113|Reactome: R-HSA-174154|Reactome: R-HSA-174178|Reactome: R-HSA-174184|Reactome: R-HSA-180534|Reactome: R-HSA-180585|Reactome: R-HSA-187577|Reactome: R-HSA-195253|Reactome: R-HSA-202424|Reactome: R-HSA-211733|Reactome: R-HSA-2467813|Reactome: R-HSA-2871837|Re…	IPR001353(Proteasome, subunit alpha/beta)	Pfam	PF00227(Proteasome subunit)	1.3e-49
FC072V.10333.1	Partial 5 Prime	KAF5594252.1	98.7	394	5	0	1	394	58	451	6.7e-212	100	KAF5594252.1 tRNA modification GTPase [Fusarium subglutinans]	fusarium subglutinans	fusarium subglutinans;fusarium fujikuroi species complex;fusarium;nectriaceae;hypocreales;hypocreomycetidae;sordariomycetes;sordariomyceta;leotiomyceta;pezizomycotina;saccharomyceta;ascomycota;dikarya;fungi;opisthokonta;eukaryota;cellular organisms;root	/LUSTRE/HOME/uva_dpvrf_1/uva_dpvrf_1_3/annotation/entap_outfiles/similarity_search/DIAMOND/blastp_transcripts_fc072v_final_nr.out	No	Yes							5518.FGSG_05220P0	1.6e-190	670.6	MSS1	Fungi	fuNOG[21]	03MZX@ascNOG,0PFQT@fuNOG,0SEYY@hypNOG,0WU42@necNOG,12SUM@opiNOG,19R4N@sordNOG,COG0486@NOG,KOG1191@euNOG		GO:0000959-mitochondrial RNA metabolic process(L=5),GO:0000963-mitochondrial RNA processing(L=7),GO:0002097-tRNA wobble base modification(L=9),GO:0002098-tRNA wobble uridine modification(L=10),GO:0006139-nucleobase-containing compound metabolic process(L=3),GO:0006152-purine nucleoside catabolic process(L=7),GO:0006163-purine nucleotide metabolic process(L=5),GO:0006184-obsolete GTP catabolic pro…	GO:0005575-cellular_component(L=0),GO:0005622-intracellular(L=3),GO:0005623-cell(L=1),GO:0005737-cytoplasm(L=4),GO:0005739-mitochondrion(L=5),GO:0005740-mitochondrial envelope(L=6),GO:0005743-mitochondrial inner membrane(L=5),GO:0016020-membrane(L=1),GO:0019866-organelle inner membrane(L=4),GO:0031090-organelle membrane(L=3),GO:0031966-mitochondrial membrane(L=5),GO:0031967-organelle envelope(L=3…	GO:0000166-nucleotide binding(L=3),GO:0001882-nucleoside binding(L=3),GO:0001883-purine nucleoside binding(L=4),GO:0003674-molecular_function(L=0),GO:0003824-catalytic activity(L=1),GO:0003924-GTPase activity(L=7),GO:0005488-binding(L=1),GO:0005525-GTP binding(L=7),GO:0016462-pyrophosphatase activity(L=5),GO:0016787-hydrolase activity(L=2),GO:0016817-hydrolase activity, acting on acid anhydrides(…				Reactome: R-HSA-6787450	IPR025867(MnmE, helical domain)	Pfam	PF12631(MnmE helical domain)	2.2e-34
FC072V.10327.1	Complete	KAF5571766.1	100	140	0	0	1	140	1	140	1.3e-64	100	KAF5571766.1 hypothetical protein FPANT_13486 [Fusarium pseudoanthophilum]	fusarium pseudoanthophilum	fusarium pseudoanthophilum;fusarium fujikuroi species complex;fusarium;nectriaceae;hypocreales;hypocreomycetidae;sordariomycetes;sordariomyceta;leotiomyceta;pezizomycotina;saccharomyceta;ascomycota;dikarya;fungi;opisthokonta;eukaryota;cellular organisms;root	/LUSTRE/HOME/uva_dpvrf_1/uva_dpvrf_1_3/annotation/entap_outfiles/similarity_search/DIAMOND/blastp_transcripts_fc072v_final_nr.out	No	No							5507.FOXG_07968P0	1.4e-64	250.8	FG05215.1	Fungi	fuNOG[21]	03UZM@ascNOG,0J404@euNOG,0PT3Y@fuNOG,0SBZ2@hypNOG,0Y8TI@NOG,13Y0X@opiNOG,19T77@sordNOG
FC072V.10325.1	Partial 5 Prime	XP_018749578.1	92.1	604	48	0	1	604	386	989	2.6e-287	96.5	XP_018749578.1 hypothetical protein FVEG_04889 [Fusarium verticillioides 7600]	fusarium verticillioides 7600	fusarium verticillioides 7600;fusarium verticillioides;fusarium fujikuroi species complex;fusarium;nectriaceae;hypocreales;hypocreomycetidae;sordariomycetes;sordariomyceta;leotiomyceta;pezizomycotina;saccharomyceta;ascomycota;dikarya;fungi;opisthokonta;eukaryota;cellular organisms;root	/LUSTRE/HOME/uva_dpvrf_1/uva_dpvrf_1_3/annotation/entap_outfiles/similarity_search/DIAMOND/blastp_transcripts_fc072v_final_nr.out	No	No							5507.FOXG_07971P0	5.8e-299	1031.6		Fungi	fuNOG[21]	04D71@ascNOG,0IMIU@euNOG,0QD79@fuNOG,0ZW15@NOG,13AUR@opiNOG		GO:0006461-protein complex assembly(L=5),GO:0006810-transport(L=3),GO:0006888-ER to Golgi vesicle-mediated transport(L=4),GO:0006900-membrane budding(L=5),GO:0006901-vesicle coating(L=5),GO:0006903-vesicle targeting(L=5),GO:0006996-organelle organization(L=3),GO:0008150-biological_process(L=0),GO:0009987-cellular process(L=1),GO:0016043-cellular component organization(L=2),GO:0016050-vesicle orga…						Reactome: R-HSA-204005	IPR024298(Ancestral coatomer element 1, Sec16/Sec31)	Pfam	PF12931(Sec23-binding domain of Sec16)	3.8e-87
FC072V.10322.1	Internal	CRK21544.1	74.5	98	25	0	1	98	76	173	2.5e-33	95.1	CRK21544.1 hypothetical protein BN1723_012434 [Verticillium longisporum]	verticillium longisporum	verticillium longisporum;verticillium;plectosphaerellaceae;glomerellales;hypocreomycetidae;sordariomycetes;sordariomyceta;leotiomyceta;pezizomycotina;saccharomyceta;ascomycota;dikarya;fungi;opisthokonta;eukaryota;cellular organisms;root	/LUSTRE/HOME/uva_dpvrf_1/uva_dpvrf_1_3/annotation/entap_outfiles/similarity_search/DIAMOND/blastp_transcripts_fc072v_final_nr.out	No	No							5507.FOXG_07972P0	1.1e-50	204.1		Fungi	fuNOG[21]	03NYU@ascNOG,0PJX3@fuNOG,0SAUH@hypNOG,12SPI@opiNOG,19MIV@sordNOG,COG1132@NOG,KOG0055@euNOG	20104976	GO:0006139-nucleobase-containing compound metabolic process(L=3),GO:0006152-purine nucleoside catabolic process(L=7),GO:0006163-purine nucleotide metabolic process(L=5),GO:0006195-purine nucleotide catabolic process(L=7),GO:0006200-obsolete ATP catabolic process(L=),GO:0006725-cellular aromatic compound metabolic process(L=3),GO:0006753-nucleoside phosphate metabolic process(L=4),GO:0006793-phosp…	GO:0005575-cellular_component(L=0),GO:0005623-cell(L=1),GO:0005886-plasma membrane(L=3),GO:0016020-membrane(L=1),GO:0016021-integral component of membrane(L=4),GO:0031224-intrinsic component of membrane(L=3),GO:0044425-membrane part(L=2),GO:0044464-cell part(L=2),GO:0071944-cell periphery(L=3),	GO:0000166-nucleotide binding(L=3),GO:0001882-nucleoside binding(L=3),GO:0001883-purine nucleoside binding(L=4),GO:0003674-molecular_function(L=0),GO:0003824-catalytic activity(L=1),GO:0005215-transporter activity(L=1),GO:0005488-binding(L=1),GO:0005524-ATP binding(L=7),GO:0015399-primary active transmembrane transporter activity(L=4),GO:0015405-P-P-bond-hydrolysis-driven transmembrane transporte…	GO:0055085-transmembrane transport(L=4),	GO:0016021-integral component of membrane(L=4),	GO:0005524-ATP binding(L=7),GO:0042626-ATPase activity, coupled to transmembrane movement of substances(L=5),		IPR011527(ABC transporter type 1, transmembrane domain)	Pfam	PF00664(ABC transporter transmembrane region)	3.7e-13
FC072V.10320.1	Complete	KAF5532728.1	99.4	163	1	0	1	163	1	163	3.3e-80	100	KAF5532728.1 transcription initiation factor TFIID subunit 13 [Fusarium phyllophilum]	fusarium phyllophilum	fusarium phyllophilum;fusarium fujikuroi species complex;fusarium;nectriaceae;hypocreales;hypocreomycetidae;sordariomycetes;sordariomyceta;leotiomyceta;pezizomycotina;saccharomyceta;ascomycota;dikarya;fungi;opisthokonta;eukaryota;cellular organisms;root	/LUSTRE/HOME/uva_dpvrf_1/uva_dpvrf_1_3/annotation/entap_outfiles/similarity_search/DIAMOND/blastp_transcripts_fc072v_final_nr.out	No	Yes							5507.FOXG_07975P0	1.2e-81	307.8	FG05211.1	Fungi	fuNOG[21]	03SVZ@ascNOG,0PPYF@fuNOG,0SEA3@hypNOG,13SPA@opiNOG,19RUF@sordNOG,COG5248@NOG,KOG3901@euNOG	30225168	GO:0006139-nucleobase-containing compound metabolic process(L=3),GO:0006351-transcription, DNA-templated(L=5),GO:0006366-transcription from RNA polymerase II promoter(L=6),GO:0006725-cellular aromatic compound metabolic process(L=3),GO:0006807-nitrogen compound metabolic process(L=2),GO:0008150-biological_process(L=0),GO:0008152-metabolic process(L=1),GO:0009058-biosynthetic process(L=2),GO:00090…			GO:0006366-transcription from RNA polymerase II promoter(L=6),				IPR003195(Transcription initiation factor IID, subunit 13)	Pfam	PF02269(Transcription initiation factor IID, 18kD subunit)	1.2e-18
FC072V.10318.1	Complete	KAF5671282.1	100	638	0	0	1	638	1	638	0	100	KAF5671282.1 SOK1 [Fusarium circinatum]	fusarium circinatum	fusarium circinatum;fusarium fujikuroi species complex;fusarium;nectriaceae;hypocreales;hypocreomycetidae;sordariomycetes;sordariomyceta;leotiomyceta;pezizomycotina;saccharomyceta;ascomycota;dikarya;fungi;opisthokonta;eukaryota;cellular organisms;root	/LUSTRE/HOME/uva_dpvrf_1/uva_dpvrf_1_3/annotation/entap_outfiles/similarity_search/DIAMOND/blastp_transcripts_fc072v_final_nr.out	No	Yes							5518.FGSG_05209P0	0	1127.9	PGUG_04780	Fungi	fuNOG[21]	03M1C@ascNOG,0PI2G@fuNOG,0SDP2@hypNOG,0WU0K@necNOG,0ZDEH@NOG,12NJX@opiNOG,19PK2@sordNOG,KOG1981@euNOG		GO:0006793-phosphorus metabolic process(L=3),GO:0006796-phosphate-containing compound metabolic process(L=4),GO:0007154-cell communication(L=2),GO:0007165-signal transduction(L=3),GO:0008150-biological_process(L=0),GO:0008152-metabolic process(L=1),GO:0009987-cellular process(L=1),GO:0016310-phosphorylation(L=5),GO:0019932-second-messenger-mediated signaling(L=5),GO:0019933-cAMP-mediated signalin…	GO:0005575-cellular_component(L=0),GO:0005622-intracellular(L=3),GO:0005623-cell(L=1),GO:0005634-nucleus(L=5),GO:0043226-organelle(L=1),GO:0043227-membrane-bounded organelle(L=2),GO:0043229-intracellular organelle(L=3),GO:0043231-intracellular membrane-bounded organelle(L=4),GO:0044424-intracellular part(L=3),GO:0044464-cell part(L=2),	GO:0003674-molecular_function(L=0),GO:0003676-nucleic acid binding(L=3),GO:0003824-catalytic activity(L=1),GO:0005488-binding(L=1),GO:0016301-kinase activity(L=4),GO:0016740-transferase activity(L=2),GO:0016772-transferase activity, transferring phosphorus-containing groups(L=3),GO:0097159-organic cyclic compound binding(L=2),GO:1901363-heterocyclic compound binding(L=2),					IPR008862(T-complex 11)	Pfam	PF05794(T-complex protein 11)	6.9e-108
FC072V.10313.1	Internal	KAF4973942.1	45.9	85	44	2	33	116	35	118	5e-06	72.4	KAF4973942.1 hypothetical protein F66182_17690, partial [Fusarium sp. NRRL 66182]	fusarium sp. nrrl 66182	fusarium sp.;fusarium;nectriaceae;hypocreales;hypocreomycetidae;sordariomycetes;sordariomyceta;leotiomyceta;pezizomycotina;saccharomyceta;ascomycota;dikarya;fungi;opisthokonta;eukaryota;cellular organisms;root	/LUSTRE/HOME/uva_dpvrf_1/uva_dpvrf_1_3/annotation/entap_outfiles/similarity_search/DIAMOND/blastp_transcripts_fc072v_final_nr.out	No	No							5507.FOXG_07978P0	2.7e-56	223	FG05208.1	Fungi	fuNOG[21]	03NWM@ascNOG,0JN9K@euNOG,0PIZN@fuNOG,0SA6G@hypNOG,0XU8C@NOG,13JDK@opiNOG,19PYW@sordNOG		GO:0000160-phosphorelay signal transduction system(L=5),GO:0006464-cellular protein modification process(L=5),GO:0006468-protein phosphorylation(L=6),GO:0006793-phosphorus metabolic process(L=3),GO:0006796-phosphate-containing compound metabolic process(L=4),GO:0007154-cell communication(L=2),GO:0007165-signal transduction(L=3),GO:0008150-biological_process(L=0),GO:0008152-metabolic process(L=1),…	GO:0000935-barrier septum(L=4),GO:0005575-cellular_component(L=0),GO:0005622-intracellular(L=3),GO:0005623-cell(L=1),GO:0005737-cytoplasm(L=4),GO:0005829-cytosol(L=4),GO:0016020-membrane(L=1),GO:0030428-cell septum(L=3),GO:0032153-cell division site(L=3),GO:0044424-intracellular part(L=3),GO:0044444-cytoplasmic part(L=4),GO:0044464-cell part(L=2),GO:0051286-cell tip(L=3),GO:0060187-cell pole(L=3),	GO:0000155-phosphorelay sensor kinase activity(L=3),GO:0003674-molecular_function(L=0),GO:0003824-catalytic activity(L=1),GO:0004672-protein kinase activity(L=5),GO:0004673-protein histidine kinase activity(L=5),GO:0004871-signal transducer activity(L=1),GO:0004872-receptor activity(L=2),GO:0016301-kinase activity(L=4),GO:0016740-transferase activity(L=2),GO:0016772-transferase activity, transfer…					IPR029191(Up-regulated during septation protein 1)	Pfam	PF15456(Up-regulated During Septation)	2.2e-14
FC072V.10309.1
FC072V.10307.1	Complete	KAF5683370.1	100	301	0	0	1	301	1	301	6.3e-162	100	KAF5683370.1 ribosomal L1 [Fusarium circinatum]	fusarium circinatum	fusarium circinatum;fusarium fujikuroi species complex;fusarium;nectriaceae;hypocreales;hypocreomycetidae;sordariomycetes;sordariomyceta;leotiomyceta;pezizomycotina;saccharomyceta;ascomycota;dikarya;fungi;opisthokonta;eukaryota;cellular organisms;root	/LUSTRE/HOME/uva_dpvrf_1/uva_dpvrf_1_3/annotation/entap_outfiles/similarity_search/DIAMOND/blastp_transcripts_fc072v_final_nr.out	No	Yes							117187.FVEG_04501T0	2.5e-162	576.6	PGUG_02167	Fungi	fuNOG[21]	03R0Y@ascNOG,0PNGA@fuNOG,0SIJ5@hypNOG,0WVST@necNOG,13Q3D@opiNOG,19IY6@sordNOG,COG0081@NOG,KOG1569@euNOG	3010	GO:0006412-translation(L=5),GO:0006996-organelle organization(L=3),GO:0007005-mitochondrion organization(L=4),GO:0008150-biological_process(L=0),GO:0008152-metabolic process(L=1),GO:0009058-biosynthetic process(L=2),GO:0009059-macromolecule biosynthetic process(L=4),GO:0009987-cellular process(L=1),GO:0010467-gene expression(L=4),GO:0016043-cellular component organization(L=2),GO:0019538-protein …	GO:0000313-organellar ribosome(L=2),GO:0000315-organellar large ribosomal subunit(L=6),GO:0005575-cellular_component(L=0),GO:0005622-intracellular(L=3),GO:0005623-cell(L=1),GO:0005634-nucleus(L=5),GO:0005730-nucleolus(L=5),GO:0005737-cytoplasm(L=4),GO:0005739-mitochondrion(L=5),GO:0005759-mitochondrial matrix(L=6),GO:0005761-mitochondrial ribosome(L=5),GO:0005762-mitochondrial large ribosomal sub…	GO:0003674-molecular_function(L=0),GO:0003676-nucleic acid binding(L=3),GO:0003723-RNA binding(L=4),GO:0003735-structural constituent of ribosome(L=2),GO:0005198-structural molecule activity(L=1),GO:0005488-binding(L=1),GO:0097159-organic cyclic compound binding(L=2),GO:1901363-heterocyclic compound binding(L=2),					IPR028364(Ribosomal protein L1/ribosomal biogenesis protein)	Pfam	PF00687(Ribosomal protein L1p/L10e family)	1.4e-23
FC072V.10305.1	Complete	KAF5683369.1	99.7	297	1	0	1	297	1	297	9.9e-168	100	KAF5683369.1 acid phosphatase precursor [Fusarium circinatum]	fusarium circinatum	fusarium circinatum;fusarium fujikuroi species complex;fusarium;nectriaceae;hypocreales;hypocreomycetidae;sordariomycetes;sordariomyceta;leotiomyceta;pezizomycotina;saccharomyceta;ascomycota;dikarya;fungi;opisthokonta;eukaryota;cellular organisms;root	/LUSTRE/HOME/uva_dpvrf_1/uva_dpvrf_1_3/annotation/entap_outfiles/similarity_search/DIAMOND/blastp_transcripts_fc072v_final_nr.out	No	Yes							117187.FVEG_04500T0	3e-168	596.3	FG05933.1	Fungi	fuNOG[21]	03NNK@ascNOG,0IKDK@euNOG,0PFT9@fuNOG,0SH8M@hypNOG,0WUP4@necNOG,13HQ3@opiNOG,19J3T@sordNOG,COG0496@NOG		GO:0008150-biological_process(L=0),GO:0008152-metabolic process(L=1),		GO:0003674-molecular_function(L=0),GO:0003824-catalytic activity(L=1),GO:0016787-hydrolase activity(L=2),			GO:0016787-hydrolase activity(L=2),	KEGG: 00230+3.1.3.5|KEGG: 00240+3.1.3.5|KEGG: 00760+3.1.3.5|MetaCyc: PWY-5381|MetaCyc: PWY-5695|MetaCyc: PWY-6596|MetaCyc: PWY-6606|MetaCyc: PWY-6607|MetaCyc: PWY-6608|MetaCyc: PWY-7185|MetaCyc: PWY-7821	IPR002828(Survival protein SurE-like phosphatase/nucleotidase)	Pfam	PF01975(Survival protein SurE)	3.7e-28
FC072V.10302.1
FC072V.10306.3	Complete	KAF5596984.1	99.6	246	1	0	1	246	1	246	1.1e-143	100	KAF5596984.1 2 3-bisphosphoglycerate-dependent phosphoglycerate mutase [Fusarium subglutinans]	fusarium subglutinans	fusarium subglutinans;fusarium fujikuroi species complex;fusarium;nectriaceae;hypocreales;hypocreomycetidae;sordariomycetes;sordariomyceta;leotiomyceta;pezizomycotina;saccharomyceta;ascomycota;dikarya;fungi;opisthokonta;eukaryota;cellular organisms;root	/LUSTRE/HOME/uva_dpvrf_1/uva_dpvrf_1_3/annotation/entap_outfiles/similarity_search/DIAMOND/blastp_transcripts_fc072v_final_nr.out	No	Yes							5507.FOXG_03653P0	1.5e-144	517.3	FG08922.1	Fungi	fuNOG[21]	04E7M@ascNOG,0IUDB@euNOG,0QEDC@fuNOG,0SNXJ@hypNOG,13GPI@opiNOG,1A7C3@sordNOG,COG0406@NOG	1.02607e+23	GO:0005975-carbohydrate metabolic process(L=3),GO:0006793-phosphorus metabolic process(L=3),GO:0006796-phosphate-containing compound metabolic process(L=4),GO:0008150-biological_process(L=0),GO:0008152-metabolic process(L=1),GO:0009058-biosynthetic process(L=2),GO:0009987-cellular process(L=1),GO:0016311-dephosphorylation(L=5),GO:0019637-organophosphate metabolic process(L=3),GO:0019693-ribose ph…	GO:0005575-cellular_component(L=0),GO:0005622-intracellular(L=3),GO:0005623-cell(L=1),GO:0005634-nucleus(L=5),GO:0005737-cytoplasm(L=4),GO:0043226-organelle(L=1),GO:0043227-membrane-bounded organelle(L=2),GO:0043229-intracellular organelle(L=3),GO:0043231-intracellular membrane-bounded organelle(L=4),GO:0044424-intracellular part(L=3),GO:0044464-cell part(L=2),	GO:0003674-molecular_function(L=0),GO:0003824-catalytic activity(L=1),GO:0004619-phosphoglycerate mutase activity(L=5),GO:0016491-oxidoreductase activity(L=2),GO:0016787-hydrolase activity(L=2),GO:0016788-hydrolase activity, acting on ester bonds(L=3),GO:0016791-phosphatase activity(L=5),GO:0016853-isomerase activity(L=2),GO:0016866-intramolecular transferase activity(L=3),GO:0016868-intramolecul…					IPR013078(Histidine phosphatase superfamily, clade-1)	Pfam	PF00300(Histidine phosphatase superfamily (branch 1))	1.7e-18
FC072V.10306.1	Complete	KAF5596984.1	99.6	246	1	0	1	246	1	246	1.1e-143	100	KAF5596984.1 2 3-bisphosphoglycerate-dependent phosphoglycerate mutase [Fusarium subglutinans]	fusarium subglutinans	fusarium subglutinans;fusarium fujikuroi species complex;fusarium;nectriaceae;hypocreales;hypocreomycetidae;sordariomycetes;sordariomyceta;leotiomyceta;pezizomycotina;saccharomyceta;ascomycota;dikarya;fungi;opisthokonta;eukaryota;cellular organisms;root	/LUSTRE/HOME/uva_dpvrf_1/uva_dpvrf_1_3/annotation/entap_outfiles/similarity_search/DIAMOND/blastp_transcripts_fc072v_final_nr.out	No	Yes							5507.FOXG_03653P0	1.5e-144	517.3	FG08922.1	Fungi	fuNOG[21]	04E7M@ascNOG,0IUDB@euNOG,0QEDC@fuNOG,0SNXJ@hypNOG,13GPI@opiNOG,1A7C3@sordNOG,COG0406@NOG	1.02607e+23	GO:0005975-carbohydrate metabolic process(L=3),GO:0006793-phosphorus metabolic process(L=3),GO:0006796-phosphate-containing compound metabolic process(L=4),GO:0008150-biological_process(L=0),GO:0008152-metabolic process(L=1),GO:0009058-biosynthetic process(L=2),GO:0009987-cellular process(L=1),GO:0016311-dephosphorylation(L=5),GO:0019637-organophosphate metabolic process(L=3),GO:0019693-ribose ph…	GO:0005575-cellular_component(L=0),GO:0005622-intracellular(L=3),GO:0005623-cell(L=1),GO:0005634-nucleus(L=5),GO:0005737-cytoplasm(L=4),GO:0043226-organelle(L=1),GO:0043227-membrane-bounded organelle(L=2),GO:0043229-intracellular organelle(L=3),GO:0043231-intracellular membrane-bounded organelle(L=4),GO:0044424-intracellular part(L=3),GO:0044464-cell part(L=2),	GO:0003674-molecular_function(L=0),GO:0003824-catalytic activity(L=1),GO:0004619-phosphoglycerate mutase activity(L=5),GO:0016491-oxidoreductase activity(L=2),GO:0016787-hydrolase activity(L=2),GO:0016788-hydrolase activity, acting on ester bonds(L=3),GO:0016791-phosphatase activity(L=5),GO:0016853-isomerase activity(L=2),GO:0016866-intramolecular transferase activity(L=3),GO:0016868-intramolecul…					IPR013078(Histidine phosphatase superfamily, clade-1)	Pfam	PF00300(Histidine phosphatase superfamily (branch 1))	1.7e-18
FC072V.10300.1	Complete	KAF5682712.1	100	563	0	0	1	563	1	563	0	100	KAF5682712.1 ubiquitin thiolesterase [Fusarium circinatum]	fusarium circinatum	fusarium circinatum;fusarium fujikuroi species complex;fusarium;nectriaceae;hypocreales;hypocreomycetidae;sordariomycetes;sordariomyceta;leotiomyceta;pezizomycotina;saccharomyceta;ascomycota;dikarya;fungi;opisthokonta;eukaryota;cellular organisms;root	/LUSTRE/HOME/uva_dpvrf_1/uva_dpvrf_1_3/annotation/entap_outfiles/similarity_search/DIAMOND/blastp_transcripts_fc072v_final_nr.out	No	Yes							117187.FVEG_02525T0	0	1076.2	UBP6	Fungi	fuNOG[21]	03MD0@ascNOG,0PITP@fuNOG,0SHNS@hypNOG,0WVCA@necNOG,0XP96@NOG,12QF8@opiNOG,19MJM@sordNOG,KOG1872@euNOG		GO:0006464-cellular protein modification process(L=5),GO:0006508-proteolysis(L=4),GO:0006511-ubiquitin-dependent protein catabolic process(L=8),GO:0007275-multicellular organism development(L=3),GO:0008150-biological_process(L=0),GO:0008152-metabolic process(L=1),GO:0009056-catabolic process(L=2),GO:0009057-macromolecule catabolic process(L=4),GO:0009892-negative regulation of metabolic process(L…	GO:0000502-proteasome complex(L=4),GO:0005575-cellular_component(L=0),GO:0005622-intracellular(L=3),GO:0005623-cell(L=1),GO:0005634-nucleus(L=5),GO:0005654-nucleoplasm(L=5),GO:0005838-proteasome regulatory particle(L=4),GO:0022624-proteasome accessory complex(L=4),GO:0031974-membrane-enclosed lumen(L=1),GO:0031981-nuclear lumen(L=6),GO:0032991-macromolecular complex(L=1),GO:0043226-organelle(L=1)…	GO:0003674-molecular_function(L=0),GO:0003824-catalytic activity(L=1),GO:0004221-obsolete ubiquitin thiolesterase activity(L=),GO:0004843-thiol-dependent ubiquitin-specific protease activity(L=5),GO:0008233-peptidase activity(L=3),GO:0008234-cysteine-type peptidase activity(L=5),GO:0016740-transferase activity(L=2),GO:0016757-transferase activity, transferring glycosyl groups(L=3),GO:0016787-hydr…	GO:0016579-protein deubiquitination(L=6),		GO:0004843-thiol-dependent ubiquitin-specific protease activity(L=5),		IPR001394(Peptidase C19, ubiquitin carboxyl-terminal hydrolase)	Pfam	PF00443(Ubiquitin carboxyl-terminal hydrolase)	3.6e-49
FC072V.10299.1	Complete	KAF5579492.1	99.4	169	1	0	1	169	52	220	2.7e-85	100	KAF5579492.1 actin 2 3 complex subunit 4 [Fusarium pseudoanthophilum]	fusarium pseudoanthophilum	fusarium pseudoanthophilum;fusarium fujikuroi species complex;fusarium;nectriaceae;hypocreales;hypocreomycetidae;sordariomycetes;sordariomyceta;leotiomyceta;pezizomycotina;saccharomyceta;ascomycota;dikarya;fungi;opisthokonta;eukaryota;cellular organisms;root	/LUSTRE/HOME/uva_dpvrf_1/uva_dpvrf_1_3/annotation/entap_outfiles/similarity_search/DIAMOND/blastp_transcripts_fc072v_final_nr.out	No	Yes							117187.FVEG_02524T0	3.3e-87	326.2	ARC19	Fungi	fuNOG[21]	03III@ascNOG,0PFJR@fuNOG,11G2F@NOG,135ZF@opiNOG,KOG1876@euNOG	4.66648e+23	GO:0000001-mitochondrion inheritance(L=5),GO:0000147-actin cortical patch assembly(L=4),GO:0006461-protein complex assembly(L=5),GO:0006810-transport(L=3),GO:0006897-endocytosis(L=5),GO:0006996-organelle organization(L=3),GO:0007005-mitochondrion organization(L=4),GO:0007010-cytoskeleton organization(L=4),GO:0007015-actin filament organization(L=5),GO:0008064-regulation of actin polymerization or…	GO:0005575-cellular_component(L=0),GO:0005622-intracellular(L=3),GO:0005623-cell(L=1),GO:0005634-nucleus(L=5),GO:0005737-cytoplasm(L=4),GO:0005829-cytosol(L=4),GO:0005856-cytoskeleton(L=5),GO:0005885-Arp2/3 protein complex(L=6),GO:0005938-cell cortex(L=5),GO:0015629-actin cytoskeleton(L=6),GO:0030479-actin cortical patch(L=5),GO:0030863-cortical cytoskeleton(L=5),GO:0030864-cortical actin cytoske…	GO:0003674-molecular_function(L=0),GO:0003779-actin binding(L=4),GO:0005198-structural molecule activity(L=1),GO:0005488-binding(L=1),GO:0005515-protein binding(L=2),GO:0008092-cytoskeletal protein binding(L=3),	GO:0030041-actin filament polymerization(L=7),GO:0034314-Arp2/3 complex-mediated actin nucleation(L=9),	GO:0005885-Arp2/3 protein complex(L=6),GO:0015629-actin cytoskeleton(L=6),		Reactome: R-HSA-2029482|Reactome: R-HSA-3928662|Reactome: R-HSA-5663213|Reactome: R-HSA-8856828	IPR008384(Actin-related protein 2/3 complex subunit 4)	Pfam	PF05856(ARP2/3 complex 20 kDa subunit (ARPC4))	1.7e-79
FC072V.10295.1
FC072V.10294.2	Partial 5 Prime	KAF4473235.1	96.5	462	16	0	2	463	36	497	7.2e-258	99.8	KAF4473235.1 Palmitoyltransferase PFA5 [Fusarium agapanthi]	fusarium agapanthi	fusarium agapanthi;fusarium;nectriaceae;hypocreales;hypocreomycetidae;sordariomycetes;sordariomyceta;leotiomyceta;pezizomycotina;saccharomyceta;ascomycota;dikarya;fungi;opisthokonta;eukaryota;cellular organisms;root	/LUSTRE/HOME/uva_dpvrf_1/uva_dpvrf_1_3/annotation/entap_outfiles/similarity_search/DIAMOND/blastp_transcripts_fc072v_final_nr.out	No	Yes							117187.FVEG_02518T0	2.8e-250	869.4	PFA5	Fungi	fuNOG[21]	03QQC@ascNOG,0PMPJ@fuNOG,0SD4A@hypNOG,13IT9@opiNOG,19N2Y@sordNOG,COG5273@NOG,KOG1315@euNOG		GO:0008150-biological_process(L=0),GO:0008152-metabolic process(L=1),	GO:0005575-cellular_component(L=0),GO:0016020-membrane(L=1),GO:0016021-integral component of membrane(L=4),GO:0031224-intrinsic component of membrane(L=3),GO:0044425-membrane part(L=2),	GO:0003674-molecular_function(L=0),GO:0003824-catalytic activity(L=1),GO:0005488-binding(L=1),GO:0008270-zinc ion binding(L=6),GO:0016740-transferase activity(L=2),GO:0016746-transferase activity, transferring acyl groups(L=3),GO:0043167-ion binding(L=2),GO:0043169-cation binding(L=3),GO:0046872-metal ion binding(L=4),GO:0046914-transition metal ion binding(L=5),			GO:0016409-palmitoyltransferase activity(L=5),		IPR001594(Palmitoyltransferase, DHHC domain)	Pfam	PF01529(DHHC palmitoyltransferase)	8.6e-21
FC072V.10293.2	Complete	KAF5670737.1	99.3	404	3	0	1	404	217	620	7.8e-240	100	KAF5670737.1 monooxygenase [Fusarium circinatum]	fusarium circinatum	fusarium circinatum;fusarium fujikuroi species complex;fusarium;nectriaceae;hypocreales;hypocreomycetidae;sordariomycetes;sordariomyceta;leotiomyceta;pezizomycotina;saccharomyceta;ascomycota;dikarya;fungi;opisthokonta;eukaryota;cellular organisms;root	/LUSTRE/HOME/uva_dpvrf_1/uva_dpvrf_1_3/annotation/entap_outfiles/similarity_search/DIAMOND/blastp_transcripts_fc072v_final_nr.out	No	Yes							117187.FVEG_13278T0	4.5e-236	822	FG09121.1	Fungi	fuNOG[21]	03QV4@ascNOG,0PG7R@fuNOG,0SF8G@hypNOG,0WV2D@necNOG,13PH2@opiNOG,19K5I@sordNOG,COG2072@NOG,KOG1399@euNOG		GO:0008150-biological_process(L=0),GO:0008152-metabolic process(L=1),GO:0044710-single-organism metabolic process(L=2),GO:0055114-oxidation-reduction process(L=3),		GO:0000166-nucleotide binding(L=3),GO:0003674-molecular_function(L=0),GO:0003824-catalytic activity(L=1),GO:0004497-monooxygenase activity(L=3),GO:0004499-N,N-dimethylaniline monooxygenase activity(L=5),GO:0005488-binding(L=1),GO:0016491-oxidoreductase activity(L=2),GO:0016705-oxidoreductase activity, acting on paired donors, with incorporation or reduction of molecular oxygen(L=3),GO:0016709-oxi…
FC072V.10293.1	Complete	KAF5670737.1	99.5	620	3	0	1	620	1	620	0	100	KAF5670737.1 monooxygenase [Fusarium circinatum]	fusarium circinatum	fusarium circinatum;fusarium fujikuroi species complex;fusarium;nectriaceae;hypocreales;hypocreomycetidae;sordariomycetes;sordariomyceta;leotiomyceta;pezizomycotina;saccharomyceta;ascomycota;dikarya;fungi;opisthokonta;eukaryota;cellular organisms;root	/LUSTRE/HOME/uva_dpvrf_1/uva_dpvrf_1_3/annotation/entap_outfiles/similarity_search/DIAMOND/blastp_transcripts_fc072v_final_nr.out	No	Yes							117187.FVEG_13278T0	0	1217.2	FG09121.1	Fungi	fuNOG[21]	03QV4@ascNOG,0PG7R@fuNOG,0SF8G@hypNOG,0WV2D@necNOG,13PH2@opiNOG,19K5I@sordNOG,COG2072@NOG,KOG1399@euNOG		GO:0008150-biological_process(L=0),GO:0008152-metabolic process(L=1),GO:0044710-single-organism metabolic process(L=2),GO:0055114-oxidation-reduction process(L=3),		GO:0000166-nucleotide binding(L=3),GO:0003674-molecular_function(L=0),GO:0003824-catalytic activity(L=1),GO:0004497-monooxygenase activity(L=3),GO:0004499-N,N-dimethylaniline monooxygenase activity(L=5),GO:0005488-binding(L=1),GO:0016491-oxidoreductase activity(L=2),GO:0016705-oxidoreductase activity, acting on paired donors, with incorporation or reduction of molecular oxygen(L=3),GO:0016709-oxi…	GO:0055114-oxidation-reduction process(L=3),		GO:0004499-N,N-dimethylaniline monooxygenase activity(L=5),GO:0050660-flavin adenine dinucleotide binding(L=4),GO:0050661-NADP binding(L=4),		IPR020946(Flavin monooxygenase-like)	Pfam	PF00743(Flavin-binding monooxygenase-like)	1.3e-09
FC072V.10291.1	Complete	KAF5584217.1	91.2	398	35	0	1	398	133	530	2.7e-208	99.7	KAF5584217.1 para-nitrobenzyl esterase [Fusarium subglutinans]	fusarium subglutinans	fusarium subglutinans;fusarium fujikuroi species complex;fusarium;nectriaceae;hypocreales;hypocreomycetidae;sordariomycetes;sordariomyceta;leotiomyceta;pezizomycotina;saccharomyceta;ascomycota;dikarya;fungi;opisthokonta;eukaryota;cellular organisms;root	/LUSTRE/HOME/uva_dpvrf_1/uva_dpvrf_1_3/annotation/entap_outfiles/similarity_search/DIAMOND/blastp_transcripts_fc072v_final_nr.out	No	Yes							117187.FVEG_13281T0	6.6e-179	632.1	FG09122.1	Fungi	fuNOG[21]	049GD@ascNOG,0QB88@fuNOG,0SI2R@hypNOG,0WU3T@necNOG,13662@opiNOG,1A6XN@sordNOG,COG2272@NOG,KOG1516@euNOG									IPR002018(Carboxylesterase, type B)	Pfam	PF00135(Carboxylesterase family)	1.5e-37
FC072V.10288.1	Complete	KAF5670730.1	100	289	0	0	1	289	1	289	4.8e-159	100	KAF5670730.1 glucose 1-dehydrogenase 2 [Fusarium circinatum]	fusarium circinatum	fusarium circinatum;fusarium fujikuroi species complex;fusarium;nectriaceae;hypocreales;hypocreomycetidae;sordariomycetes;sordariomyceta;leotiomyceta;pezizomycotina;saccharomyceta;ascomycota;dikarya;fungi;opisthokonta;eukaryota;cellular organisms;root	/LUSTRE/HOME/uva_dpvrf_1/uva_dpvrf_1_3/annotation/entap_outfiles/similarity_search/DIAMOND/blastp_transcripts_fc072v_final_nr.out	No	Yes							5507.FOXG_15817P0	4.5e-145	519.2	FG09125.1	Fungi	fuNOG[21]	03XNR@ascNOG,0PV3A@fuNOG,0SJTJ@hypNOG,13WQA@opiNOG,19M4M@sordNOG,COG1028@NOG,KOG4169@euNOG		GO:0008150-biological_process(L=0),GO:0008152-metabolic process(L=1),GO:0044710-single-organism metabolic process(L=2),GO:0055114-oxidation-reduction process(L=3),		GO:0003674-molecular_function(L=0),GO:0003824-catalytic activity(L=1),GO:0016491-oxidoreductase activity(L=2),	GO:0055114-oxidation-reduction process(L=3),				IPR002347(Short-chain dehydrogenase/reductase SDR)	Pfam	PF00106(short chain dehydrogenase)	1.3e-37
FC072V.10287.1
FC072V.10488.1
FC072V.10284.1
FC072V.10283.1	Complete	KAF5579561.1	99.4	338	2	0	1	338	1	338	1.6e-201	100	KAF5579561.1 alkanal monooxygenase [Fusarium subglutinans]	fusarium subglutinans	fusarium subglutinans;fusarium fujikuroi species complex;fusarium;nectriaceae;hypocreales;hypocreomycetidae;sordariomycetes;sordariomyceta;leotiomyceta;pezizomycotina;saccharomyceta;ascomycota;dikarya;fungi;opisthokonta;eukaryota;cellular organisms;root	/LUSTRE/HOME/uva_dpvrf_1/uva_dpvrf_1_3/annotation/entap_outfiles/similarity_search/DIAMOND/blastp_transcripts_fc072v_final_nr.out	No	Yes							5507.FOXG_15821P0	1.2e-194	684.1		Fungi	fuNOG[21]	04AEI@ascNOG,0JD5S@euNOG,0QAB2@fuNOG,0SFG1@hypNOG,11RKB@NOG,1373R@opiNOG,1A51Z@sordNOG		GO:0006629-lipid metabolic process(L=3),GO:0008150-biological_process(L=0),GO:0008152-metabolic process(L=1),GO:0044238-primary metabolic process(L=2),GO:0044710-single-organism metabolic process(L=2),GO:0071704-organic substance metabolic process(L=2),			GO:0006629-lipid metabolic process(L=3),				IPR005804(Fatty acid desaturase domain)	Pfam	PF00487(Fatty acid desaturase)	8.8e-21
FC072V.10280.1	Complete	KAF5684198.1	95.5	561	25	0	1	561	1	561	0	94.6	KAF5684198.1 murein transglycosylase [Fusarium denticulatum]	fusarium denticulatum	fusarium denticulatum;fusarium fujikuroi species complex;fusarium;nectriaceae;hypocreales;hypocreomycetidae;sordariomycetes;sordariomyceta;leotiomyceta;pezizomycotina;saccharomyceta;ascomycota;dikarya;fungi;opisthokonta;eukaryota;cellular organisms;root	/LUSTRE/HOME/uva_dpvrf_1/uva_dpvrf_1_3/annotation/entap_outfiles/similarity_search/DIAMOND/blastp_transcripts_fc072v_final_nr.out	No	Yes							5507.FOXG_15830P0	6.7e-305	1051.2		Fungi	fuNOG[21]	03IIQ@ascNOG,0IJNB@euNOG,0PI24@fuNOG,0SAX9@hypNOG,0XS7J@NOG,12TVU@opiNOG,19JZ9@sordNOG		GO:0008150-biological_process(L=0),GO:0008152-metabolic process(L=1),		GO:0003674-molecular_function(L=0),GO:0003824-catalytic activity(L=1),GO:0016787-hydrolase activity(L=2),GO:0016798-hydrolase activity, acting on glycosyl bonds(L=3),			GO:0016787-hydrolase activity(L=2),		IPR005197(Glycoside hydrolase family 71)	Pfam	PF03659(Glycosyl hydrolase family 71)	4.2e-125
FC072V.10278.1	Complete	KAF5670707.1	100	383	0	0	1	383	1	383	5.8e-221	100	KAF5670707.1 hypothetical protein FCIRC_8873 [Fusarium circinatum]	fusarium circinatum	fusarium circinatum;fusarium fujikuroi species complex;fusarium;nectriaceae;hypocreales;hypocreomycetidae;sordariomycetes;sordariomyceta;leotiomyceta;pezizomycotina;saccharomyceta;ascomycota;dikarya;fungi;opisthokonta;eukaryota;cellular organisms;root	/LUSTRE/HOME/uva_dpvrf_1/uva_dpvrf_1_3/annotation/entap_outfiles/similarity_search/DIAMOND/blastp_transcripts_fc072v_final_nr.out	No	No							5507.FOXG_15833P0	5e-200	702.2	FG02918.1	Fungi	fuNOG[21]	03RMK@ascNOG,0PNP1@fuNOG,0SFYA@hypNOG,0XNV7@NOG,13QH7@opiNOG,19IVZ@sordNOG,KOG1339@euNOG		GO:0006508-proteolysis(L=4),GO:0008150-biological_process(L=0),GO:0008152-metabolic process(L=1),GO:0019538-protein metabolic process(L=3),GO:0043170-macromolecule metabolic process(L=3),GO:0044238-primary metabolic process(L=2),GO:0071704-organic substance metabolic process(L=2),		GO:0003674-molecular_function(L=0),GO:0003824-catalytic activity(L=1),GO:0004175-endopeptidase activity(L=5),GO:0004190-aspartic-type endopeptidase activity(L=6),GO:0008233-peptidase activity(L=3),GO:0016787-hydrolase activity(L=2),GO:0070001-aspartic-type peptidase activity(L=5),GO:0070011-peptidase activity, acting on L-amino acid peptides(L=4),					IPR033121(Peptidase family A1 domain)	Pfam	PF00026(Eukaryotic aspartyl protease)	1.7e-43
FC072V.10277.1	Partial 5 Prime	KAF5670706.1	99.6	274	1	0	1	274	273	546	2.8e-148	100	KAF5670706.1 cellobiose dehydrogenase [Fusarium circinatum]	fusarium circinatum	fusarium circinatum;fusarium fujikuroi species complex;fusarium;nectriaceae;hypocreales;hypocreomycetidae;sordariomycetes;sordariomyceta;leotiomyceta;pezizomycotina;saccharomyceta;ascomycota;dikarya;fungi;opisthokonta;eukaryota;cellular organisms;root	/LUSTRE/HOME/uva_dpvrf_1/uva_dpvrf_1_3/annotation/entap_outfiles/similarity_search/DIAMOND/blastp_transcripts_fc072v_final_nr.out	No	Yes							5507.FOXG_15834P0	2e-147	526.9	FG02917.1	Fungi	fuNOG[21]	03NYG@ascNOG,0PKE9@fuNOG,0SK2Q@hypNOG,13PM0@opiNOG,19K0N@sordNOG,COG2303@NOG,KOG1238@euNOG		GO:0005975-carbohydrate metabolic process(L=3),GO:0006066-alcohol metabolic process(L=4),GO:0008150-biological_process(L=0),GO:0008152-metabolic process(L=1),GO:0009056-catabolic process(L=2),GO:0016052-carbohydrate catabolic process(L=4),GO:0044238-primary metabolic process(L=2),GO:0044281-small molecule metabolic process(L=3),GO:0044710-single-organism metabolic process(L=2),GO:0055114-oxidatio…		GO:0000166-nucleotide binding(L=3),GO:0003674-molecular_function(L=0),GO:0003824-catalytic activity(L=1),GO:0005488-binding(L=1),GO:0008812-choline dehydrogenase activity(L=4),GO:0016491-oxidoreductase activity(L=2),GO:0016614-oxidoreductase activity, acting on CH-OH group of donors(L=3),GO:0030246-carbohydrate binding(L=2),GO:0036094-small molecule binding(L=2),GO:0043167-ion binding(L=2),GO:004…	GO:0055114-oxidation-reduction process(L=3),		GO:0016614-oxidoreductase activity, acting on CH-OH group of donors(L=3),	Reactome: R-HSA-6798163	IPR007867(Glucose-methanol-choline oxidoreductase, C-terminal)	Pfam	PF05199(GMC oxidoreductase)	2.8e-18
FC072V.10274.1
FC072V.10276.1	Complete	KAF4415237.1	99.7	386	1	0	1	386	1	386	2.7e-218	100	KAF4415237.1 delta-aminolevulinic acid dehydratase [Fusarium acutatum]	fusarium acutatum	fusarium acutatum;fusarium fujikuroi species complex;fusarium;nectriaceae;hypocreales;hypocreomycetidae;sordariomycetes;sordariomyceta;leotiomyceta;pezizomycotina;saccharomyceta;ascomycota;dikarya;fungi;opisthokonta;eukaryota;cellular organisms;root	/LUSTRE/HOME/uva_dpvrf_1/uva_dpvrf_1_3/annotation/entap_outfiles/similarity_search/DIAMOND/blastp_transcripts_fc072v_final_nr.out	No	Yes							117187.FVEG_02693T0	2.2e-219	766.5	HEM2	Fungi	fuNOG[21]	03IQH@ascNOG,0PFRX@fuNOG,0SGG4@hypNOG,0WW67@necNOG,12SP6@opiNOG,1A6QF@sordNOG,COG0113@NOG,KOG2794@euNOG	86011001110	GO:0006725-cellular aromatic compound metabolic process(L=3),GO:0006778-porphyrin-containing compound metabolic process(L=4),GO:0006779-porphyrin-containing compound biosynthetic process(L=5),GO:0006782-protoporphyrinogen IX biosynthetic process(L=7),GO:0006783-heme biosynthetic process(L=4),GO:0006807-nitrogen compound metabolic process(L=2),GO:0007275-multicellular organism development(L=3),GO:…	GO:0005575-cellular_component(L=0),GO:0005622-intracellular(L=3),GO:0005623-cell(L=1),GO:0005634-nucleus(L=5),GO:0005737-cytoplasm(L=4),GO:0005829-cytosol(L=4),GO:0043226-organelle(L=1),GO:0043227-membrane-bounded organelle(L=2),GO:0043229-intracellular organelle(L=3),GO:0043231-intracellular membrane-bounded organelle(L=4),GO:0044424-intracellular part(L=3),GO:0044444-cytoplasmic part(L=4),GO:00…	GO:0003674-molecular_function(L=0),GO:0003824-catalytic activity(L=1),GO:0004655-porphobilinogen synthase activity(L=5),GO:0005488-binding(L=1),GO:0008270-zinc ion binding(L=6),GO:0016829-lyase activity(L=2),GO:0016835-carbon-oxygen lyase activity(L=3),GO:0016836-hydro-lyase activity(L=4),GO:0032791-lead ion binding(L=5),GO:0043167-ion binding(L=2),GO:0043169-cation binding(L=3),GO:0046872-metal …	GO:0033014-tetrapyrrole biosynthetic process(L=5),		GO:0004655-porphobilinogen synthase activity(L=5),GO:0046872-metal ion binding(L=4),	KEGG: 00860+4.2.1.24|MetaCyc: PWY-5188|MetaCyc: PWY-5189|Reactome: R-HSA-189451|Reactome: R-HSA-6798695	IPR001731(Delta-aminolevulinic acid dehydratase)	Pfam	PF00490(Delta-aminolevulinic acid dehydratase)	9.3e-123
FC072V.10265.1	Partial 3 Prime	KAF7517123.1	65.6	244	81	2	1	241	55	298	1.8e-82	100	KAF7517123.1 hypothetical protein G7054_g13900 [Neopestalotiopsis clavispora]	neopestalotiopsis clavispora	neopestalotiopsis clavispora;neopestalotiopsis;sporocadaceae;xylariales;xylariomycetidae;sordariomycetes;sordariomyceta;leotiomyceta;pezizomycotina;saccharomyceta;ascomycota;dikarya;fungi;opisthokonta;eukaryota;cellular organisms;root	/LUSTRE/HOME/uva_dpvrf_1/uva_dpvrf_1_3/annotation/entap_outfiles/similarity_search/DIAMOND/blastp_transcripts_fc072v_final_nr.out	No	No							117187.FVEG_14166T0	1.6e-132	477.2	FG10719.1	Fungi	fuNOG[21]	03K7Z@ascNOG,0IEEY@euNOG,0PHAB@fuNOG,0SCRG@hypNOG,12PW9@opiNOG,19IT7@sordNOG,COG1297@NOG		GO:0006810-transport(L=3),GO:0006857-oligopeptide transport(L=6),GO:0008104-protein localization(L=3),GO:0008150-biological_process(L=0),GO:0009987-cellular process(L=1),GO:0015031-protein transport(L=4),GO:0015833-peptide transport(L=5),GO:0033036-macromolecule localization(L=2),GO:0042886-amide transport(L=5),GO:0044699-single-organism process(L=1),GO:0044763-single-organism cellular process(L=…	GO:0000322-storage vacuole(L=6),GO:0000323-lytic vacuole(L=6),GO:0000324-fungal-type vacuole(L=7),GO:0000329-fungal-type vacuole membrane(L=7),GO:0005575-cellular_component(L=0),GO:0005622-intracellular(L=3),GO:0005623-cell(L=1),GO:0005737-cytoplasm(L=4),GO:0005773-vacuole(L=5),GO:0005774-vacuolar membrane(L=6),GO:0016020-membrane(L=1),GO:0016021-integral component of membrane(L=4),GO:0031090-org…	GO:0003674-molecular_function(L=0),GO:0005215-transporter activity(L=1),GO:0005488-binding(L=1),GO:0015197-peptide transporter activity(L=3),GO:0015198-oligopeptide transporter activity(L=4),GO:0022892-substrate-specific transporter activity(L=2),GO:0051536-iron-sulfur cluster binding(L=3),GO:0051537-2 iron, 2 sulfur cluster binding(L=4),GO:0051540-metal cluster binding(L=2),	GO:0055085-transmembrane transport(L=4),				IPR004813(Oligopeptide transporter, OPT superfamily)	Pfam	PF03169(OPT oligopeptide transporter protein)	3e-42
FC072V.10271.1	Complete	XP_018250977.1	88.9	314	35	0	1	314	65	378	3.3e-101	88	XP_018250977.1 hypothetical protein FOXG_12637 [Fusarium oxysporum f. sp. lycopersici 4287]	fusarium oxysporum f. sp. lycopersici 4287	fusarium oxysporum f. sp. lycopersici 4287;fusarium oxysporum f. sp. lycopersici;fusarium oxysporum;fusarium oxysporum species complex;fusarium;nectriaceae;hypocreales;hypocreomycetidae;sordariomycetes;sordariomyceta;leotiomyceta;pezizomycotina;saccharomyceta;ascomycota;dikarya;fungi;opisthokonta;eukaryota;cellular organisms;root	/LUSTRE/HOME/uva_dpvrf_1/uva_dpvrf_1_3/annotation/entap_outfiles/similarity_search/DIAMOND/blastp_transcripts_fc072v_final_nr.out	No	No							117187.FVEG_14168T0	6.7e-90	336.3	USO1	Fungi	fuNOG[21]	03K5Y@ascNOG,0PIP4@fuNOG,0SBY5@hypNOG,0WWZE@necNOG,0XRCG@NOG,12NQV@opiNOG,19K3M@sordNOG,KOG0946@euNOG		GO:0006461-protein complex assembly(L=5),GO:0006464-cellular protein modification process(L=5),GO:0006479-protein methylation(L=4),GO:0006810-transport(L=3),GO:0006886-intracellular protein transport(L=5),GO:0006888-ER to Golgi vesicle-mediated transport(L=4),GO:0006906-vesicle fusion(L=5),GO:0006996-organelle organization(L=3),GO:0007154-cell communication(L=2),GO:0007165-signal transduction(L=3…	GO:0000139-Golgi membrane(L=5),GO:0005575-cellular_component(L=0),GO:0005622-intracellular(L=3),GO:0005623-cell(L=1),GO:0005737-cytoplasm(L=4),GO:0005783-endoplasmic reticulum(L=4),GO:0005789-endoplasmic reticulum membrane(L=3),GO:0005794-Golgi apparatus(L=4),GO:0005856-cytoskeleton(L=5),GO:0012505-endomembrane system(L=3),GO:0012506-vesicle membrane(L=4),GO:0012507-ER to Golgi transport vesicle …	GO:0003674-molecular_function(L=0),GO:0003824-catalytic activity(L=1),GO:0004871-signal transducer activity(L=1),GO:0005215-transporter activity(L=1),GO:0008168-methyltransferase activity(L=4),GO:0008276-protein methyltransferase activity(L=5),GO:0008565-protein transporter activity(L=3),GO:0016740-transferase activity(L=2),GO:0016741-transferase activity, transferring one-carbon groups(L=3),GO:0…	GO:0006886-intracellular protein transport(L=5),GO:0016192-vesicle-mediated transport(L=4),			Reactome: R-HSA-162658|Reactome: R-HSA-204005|Reactome: R-HSA-6807878	IPR006955(Uso1/p115-like vesicle tethering protein, C-terminal)	Pfam	PF04871(Uso1 / p115 like vesicle tethering protein, C terminal region)	7e-11
FC072V.10262.1	Complete	KLO82066.1	94.1	919	42	3	1	907	79	997	0	99.8	KLO82066.1 Uncharacterized protein Y057_656 [Fusarium fujikuroi]	fusarium fujikuroi	fusarium fujikuroi;fusarium fujikuroi species complex;fusarium;nectriaceae;hypocreales;hypocreomycetidae;sordariomycetes;sordariomyceta;leotiomyceta;pezizomycotina;saccharomyceta;ascomycota;dikarya;fungi;opisthokonta;eukaryota;cellular organisms;root	/LUSTRE/HOME/uva_dpvrf_1/uva_dpvrf_1_3/annotation/entap_outfiles/similarity_search/DIAMOND/blastp_transcripts_fc072v_final_nr.out	No	No							117187.FVEG_14169T0	0	1648.3	RAT1	Fungi	fuNOG[21]	03JPS@ascNOG,0PGM5@fuNOG,0SAVC@hypNOG,12PDD@opiNOG,19Q2K@sordNOG,COG5049@NOG,KOG2044@euNOG	30083018	GO:0000070-mitotic sister chromatid segregation(L=5),GO:0000278-mitotic cell cycle(L=4),GO:0000280-nuclear division(L=5),GO:0000819-sister chromatid segregation(L=6),GO:0000956-nuclear-transcribed mRNA catabolic process(L=7),GO:0006139-nucleobase-containing compound metabolic process(L=3),GO:0006351-transcription, DNA-templated(L=5),GO:0006353-DNA-templated transcription, termination(L=7),GO:0006…	GO:0005575-cellular_component(L=0),GO:0005622-intracellular(L=3),GO:0005623-cell(L=1),GO:0005634-nucleus(L=5),GO:0005737-cytoplasm(L=4),GO:0005739-mitochondrion(L=5),GO:0043226-organelle(L=1),GO:0043227-membrane-bounded organelle(L=2),GO:0043229-intracellular organelle(L=3),GO:0043231-intracellular membrane-bounded organelle(L=4),GO:0044424-intracellular part(L=3),GO:0044444-cytoplasmic part(L=4)…	GO:0003674-molecular_function(L=0),GO:0003676-nucleic acid binding(L=3),GO:0003824-catalytic activity(L=1),GO:0004518-nuclease activity(L=4),GO:0004527-exonuclease activity(L=5),GO:0004532-exoribonuclease activity(L=6),GO:0004534-5'-3' exoribonuclease activity(L=7),GO:0004540-ribonuclease activity(L=5),GO:0005488-binding(L=1),GO:0008270-zinc ion binding(L=6),GO:0008409-5'-3' exonuclease activity(…					IPR041412(Xrn1, helical domain)	Pfam	PF17846(Xrn1 helical domain)	5.7e-142
FC072V.10264.1	Partial 3 Prime																								5507.FOXG_12635P0	1.5e-45	187.2	IRA2	Fungi	fuNOG[21]	03KEK@ascNOG,0PHG3@fuNOG,0SAW7@hypNOG,0XRPJ@NOG,12RI6@opiNOG,19K09@sordNOG,KOG1826@euNOG	4010	GO:0006139-nucleobase-containing compound metabolic process(L=3),GO:0006140-regulation of nucleotide metabolic process(L=6),GO:0006725-cellular aromatic compound metabolic process(L=3),GO:0006807-nitrogen compound metabolic process(L=2),GO:0006950-response to stress(L=2),GO:0007154-cell communication(L=2),GO:0007165-signal transduction(L=3),GO:0008150-biological_process(L=0),GO:0008152-metabolic …	GO:0005575-cellular_component(L=0),GO:0005622-intracellular(L=3),GO:0005623-cell(L=1),GO:0005737-cytoplasm(L=4),GO:0005739-mitochondrion(L=5),GO:0005783-endoplasmic reticulum(L=4),GO:0005789-endoplasmic reticulum membrane(L=3),GO:0005886-plasma membrane(L=3),GO:0005911-cell-cell junction(L=2),GO:0005923-bicellular tight junction(L=4),GO:0009898-cytoplasmic side of plasma membrane(L=3),GO:0012505-…	GO:0003674-molecular_function(L=0),GO:0003676-nucleic acid binding(L=3),GO:0003824-catalytic activity(L=1),GO:0004518-nuclease activity(L=4),GO:0004527-exonuclease activity(L=5),GO:0005096-GTPase activator activity(L=4),GO:0005198-structural molecule activity(L=1),GO:0005488-binding(L=1),GO:0008047-enzyme activator activity(L=3),GO:0008270-zinc ion binding(L=6),GO:0016787-hydrolase activity(L=2),…
FC072V.10258.1	Complete	KAF5601106.1	99.5	651	3	0	16	666	29	679	0	97.7	KAF5601106.1 ATP-dependent RNA helicase DED1 [Fusarium subglutinans]	fusarium subglutinans	fusarium subglutinans;fusarium fujikuroi species complex;fusarium;nectriaceae;hypocreales;hypocreomycetidae;sordariomycetes;sordariomyceta;leotiomyceta;pezizomycotina;saccharomyceta;ascomycota;dikarya;fungi;opisthokonta;eukaryota;cellular organisms;root	/LUSTRE/HOME/uva_dpvrf_1/uva_dpvrf_1_3/annotation/entap_outfiles/similarity_search/DIAMOND/blastp_transcripts_fc072v_final_nr.out	No	Yes							5507.FOXG_02019P0	0	1078.9	DED1	Fungi	fuNOG[21]	03IW9@ascNOG,0PFY4@fuNOG,0SH5P@hypNOG,0XNTI@NOG,12N5P@opiNOG,19MUK@sordNOG,KOG0335@euNOG	462251615203	GO:0000278-mitotic cell cycle(L=4),GO:0000280-nuclear division(L=5),GO:0002181-cytoplasmic translation(L=7),GO:0002183-cytoplasmic translational initiation(L=8),GO:0006139-nucleobase-containing compound metabolic process(L=3),GO:0006152-purine nucleoside catabolic process(L=7),GO:0006163-purine nucleotide metabolic process(L=5),GO:0006195-purine nucleotide catabolic process(L=7),GO:0006200-obsole…	GO:0005575-cellular_component(L=0),GO:0005622-intracellular(L=3),GO:0005623-cell(L=1),GO:0005634-nucleus(L=5),GO:0005737-cytoplasm(L=4),GO:0005829-cytosol(L=4),GO:0043226-organelle(L=1),GO:0043227-membrane-bounded organelle(L=2),GO:0043229-intracellular organelle(L=3),GO:0043231-intracellular membrane-bounded organelle(L=4),GO:0044424-intracellular part(L=3),GO:0044444-cytoplasmic part(L=4),GO:00…	GO:0000166-nucleotide binding(L=3),GO:0001882-nucleoside binding(L=3),GO:0001883-purine nucleoside binding(L=4),GO:0003674-molecular_function(L=0),GO:0003676-nucleic acid binding(L=3),GO:0003723-RNA binding(L=4),GO:0003724-RNA helicase activity(L=8),GO:0003725-double-stranded RNA binding(L=5),GO:0003727-single-stranded RNA binding(L=5),GO:0003743-translation initiation factor activity(L=6),GO:000…			GO:0003676-nucleic acid binding(L=3),GO:0005524-ATP binding(L=7),		IPR011545(DEAD/DEAH box helicase domain)	Pfam	PF00270(DEAD/DEAH box helicase)	2.5e-48
FC072V.10257.1	Partial 5 Prime	KAF5661159.1	100	245	0	0	1	245	20	264	1.1e-135	100	KAF5661159.1 proteasome subunit beta type-2 [Fusarium circinatum]	fusarium circinatum	fusarium circinatum;fusarium fujikuroi species complex;fusarium;nectriaceae;hypocreales;hypocreomycetidae;sordariomycetes;sordariomyceta;leotiomyceta;pezizomycotina;saccharomyceta;ascomycota;dikarya;fungi;opisthokonta;eukaryota;cellular organisms;root	/LUSTRE/HOME/uva_dpvrf_1/uva_dpvrf_1_3/annotation/entap_outfiles/similarity_search/DIAMOND/blastp_transcripts_fc072v_final_nr.out	No	Yes							117187.FVEG_05183T0	8e-111	405.2	PRE1	Fungi	fuNOG[21]	03KW7@ascNOG,0PHXK@fuNOG,0SCZ5@hypNOG,0WTGC@necNOG,12SW3@opiNOG,19K50@sordNOG,COG0638@NOG,KOG0177@euNOG	3050	GO:0006508-proteolysis(L=4),GO:0006511-ubiquitin-dependent protein catabolic process(L=8),GO:0007346-regulation of mitotic cell cycle(L=5),GO:0008150-biological_process(L=0),GO:0008152-metabolic process(L=1),GO:0009056-catabolic process(L=2),GO:0009057-macromolecule catabolic process(L=4),GO:0009987-cellular process(L=1),GO:0010498-proteasomal protein catabolic process(L=7),GO:0010499-proteasomal…	GO:0000502-proteasome complex(L=4),GO:0005575-cellular_component(L=0),GO:0005622-intracellular(L=3),GO:0005623-cell(L=1),GO:0005634-nucleus(L=5),GO:0005635-nuclear envelope(L=4),GO:0005737-cytoplasm(L=4),GO:0005783-endoplasmic reticulum(L=4),GO:0005789-endoplasmic reticulum membrane(L=3),GO:0005829-cytosol(L=4),GO:0005839-proteasome core complex(L=4),GO:0012505-endomembrane system(L=3),GO:0016020…	GO:0003674-molecular_function(L=0),GO:0003824-catalytic activity(L=1),GO:0004175-endopeptidase activity(L=5),GO:0004298-threonine-type endopeptidase activity(L=6),GO:0008047-enzyme activator activity(L=3),GO:0008233-peptidase activity(L=3),GO:0016504-peptidase activator activity(L=4),GO:0016787-hydrolase activity(L=2),GO:0030234-enzyme regulator activity(L=2),GO:0061133-endopeptidase activator ac…	GO:0051603-proteolysis involved in cellular protein catabolic process(L=6),	GO:0005839-proteasome core complex(L=4),		Reactome: R-HSA-1169091|Reactome: R-HSA-1234176|Reactome: R-HSA-1236974|Reactome: R-HSA-1236978|Reactome: R-HSA-174084|Reactome: R-HSA-174113|Reactome: R-HSA-174154|Reactome: R-HSA-174178|Reactome: R-HSA-174184|Reactome: R-HSA-180534|Reactome: R-HSA-180585|Reactome: R-HSA-187577|Reactome: R-HSA-195253|Reactome: R-HSA-202424|Reactome: R-HSA-211733|Reactome: R-HSA-2467813|Reactome: R-HSA-2871837|Re…	IPR001353(Proteasome, subunit alpha/beta)	Pfam	PF00227(Proteasome subunit)	1.7e-37
FC072V.10247.1	Partial 5 Prime	KAF5989967.1	98.3	884	15	0	1	884	111	994	0	100	KAF5989967.1 CMGC/CDK/CRK7 protein kinase [Fusarium bulbicola]	fusarium bulbicola	fusarium bulbicola;fusarium fujikuroi species complex;fusarium;nectriaceae;hypocreales;hypocreomycetidae;sordariomycetes;sordariomyceta;leotiomyceta;pezizomycotina;saccharomyceta;ascomycota;dikarya;fungi;opisthokonta;eukaryota;cellular organisms;root	/LUSTRE/HOME/uva_dpvrf_1/uva_dpvrf_1_3/annotation/entap_outfiles/similarity_search/DIAMOND/blastp_transcripts_fc072v_final_nr.out	No	Yes							5507.FOXG_02030P0	0	1153.7	CTK1	Fungi	fuNOG[21]	03JID@ascNOG,0PGKY@fuNOG,0SGAW@hypNOG,0XPIR@NOG,12U8M@opiNOG,19PDK@sordNOG,KOG0600@euNOG		GO:0000075-cell cycle checkpoint(L=5),GO:0000910-cytokinesis(L=4),GO:0001558-regulation of cell growth(L=4),GO:0006139-nucleobase-containing compound metabolic process(L=3),GO:0006351-transcription, DNA-templated(L=5),GO:0006355-regulation of transcription, DNA-templated(L=7),GO:0006356-regulation of transcription from RNA polymerase I promoter(L=8),GO:0006357-regulation of transcription from RNA…	GO:0005575-cellular_component(L=0),GO:0005622-intracellular(L=3),GO:0005623-cell(L=1),GO:0005634-nucleus(L=5),GO:0005654-nucleoplasm(L=5),GO:0005730-nucleolus(L=5),GO:0005737-cytoplasm(L=4),GO:0008023-transcription elongation factor complex(L=7),GO:0008024-cyclin/CDK positive transcription elongation factor complex(L=8),GO:0031974-membrane-enclosed lumen(L=1),GO:0031981-nuclear lumen(L=6),GO:0032…	GO:0000166-nucleotide binding(L=3),GO:0001882-nucleoside binding(L=3),GO:0001883-purine nucleoside binding(L=4),GO:0003674-molecular_function(L=0),GO:0003676-nucleic acid binding(L=3),GO:0003677-DNA binding(L=4),GO:0003824-catalytic activity(L=1),GO:0003899-DNA-directed 5'-3' RNA polymerase activity(L=7),GO:0004672-protein kinase activity(L=5),GO:0004674-protein serine/threonine kinase activity(L…	GO:0006468-protein phosphorylation(L=6),		GO:0004672-protein kinase activity(L=5),GO:0005524-ATP binding(L=7),		IPR000719(Protein kinase domain)	Pfam	PF00069(Protein kinase domain)	2.6e-69
FC072V.10255.1	Complete	KAF5658629.1	100	294	0	0	1	294	1	294	1.9e-155	100	KAF5658629.1 pppde peptidase [Fusarium circinatum]	fusarium circinatum	fusarium circinatum;fusarium fujikuroi species complex;fusarium;nectriaceae;hypocreales;hypocreomycetidae;sordariomycetes;sordariomyceta;leotiomyceta;pezizomycotina;saccharomyceta;ascomycota;dikarya;fungi;opisthokonta;eukaryota;cellular organisms;root	/LUSTRE/HOME/uva_dpvrf_1/uva_dpvrf_1_3/annotation/entap_outfiles/similarity_search/DIAMOND/blastp_transcripts_fc072v_final_nr.out	No	Yes							117187.FVEG_03466T0	2.8e-142	510	FG04737.1	Fungi	fuNOG[21]	03PDH@ascNOG,0II1E@euNOG,0PKAT@fuNOG,0SMI9@hypNOG,0WX6B@necNOG,0XRC6@NOG,12VYC@opiNOG,19IEV@sordNOG
FC072V.10254.1	Partial 3 Prime	EXK32556.1	90.2	133	12	1	1	133	78	209	7.8e-51	97.1	EXK32556.1 hypothetical protein FOMG_11455 [Fusarium oxysporum f. sp. melonis 26406]	fusarium oxysporum f. sp. melonis 26406	fusarium oxysporum f. sp. melonis 26406;fusarium oxysporum f. sp. melonis;fusarium oxysporum;fusarium oxysporum species complex;fusarium;nectriaceae;hypocreales;hypocreomycetidae;sordariomycetes;sordariomyceta;leotiomyceta;pezizomycotina;saccharomyceta;ascomycota;dikarya;fungi;opisthokonta;eukaryota;cellular organisms;root	/LUSTRE/HOME/uva_dpvrf_1/uva_dpvrf_1_3/annotation/entap_outfiles/similarity_search/DIAMOND/blastp_transcripts_fc072v_final_nr.out	No	No							117187.FVEG_03466T0	6e-47	192.2	FG04737.1	Fungi	fuNOG[21]	03PDH@ascNOG,0II1E@euNOG,0PKAT@fuNOG,0SMI9@hypNOG,0WX6B@necNOG,0XRC6@NOG,12VYC@opiNOG,19IEV@sordNOG
FC072V.10251.1	Complete	KAF5658626.1	99.7	383	1	0	1	383	1	383	2.3e-225	100	KAF5658626.1 mannan endo-1,4-beta-mannosidase B [Fusarium circinatum]	fusarium circinatum	fusarium circinatum;fusarium fujikuroi species complex;fusarium;nectriaceae;hypocreales;hypocreomycetidae;sordariomycetes;sordariomyceta;leotiomyceta;pezizomycotina;saccharomyceta;ascomycota;dikarya;fungi;opisthokonta;eukaryota;cellular organisms;root	/LUSTRE/HOME/uva_dpvrf_1/uva_dpvrf_1_3/annotation/entap_outfiles/similarity_search/DIAMOND/blastp_transcripts_fc072v_final_nr.out	No	Yes							117187.FVEG_03463T0	6.9e-210	734.9	MANA	Fungi	fuNOG[21]	03NDK@ascNOG,0IIG3@euNOG,0PKKN@fuNOG,0SI6G@hypNOG,0WXV3@necNOG,12P7K@opiNOG,19MVD@sordNOG,COG3934@NOG		GO:0000272-polysaccharide catabolic process(L=5),GO:0005975-carbohydrate metabolic process(L=3),GO:0005976-polysaccharide metabolic process(L=4),GO:0008150-biological_process(L=0),GO:0008152-metabolic process(L=1),GO:0009056-catabolic process(L=2),GO:0009057-macromolecule catabolic process(L=4),GO:0009987-cellular process(L=1),GO:0010412-mannan metabolic process(L=5),GO:0016052-carbohydrate catab…	GO:0005575-cellular_component(L=0),GO:0005576-extracellular region(L=1),	GO:0001871-pattern binding(L=2),GO:0003674-molecular_function(L=0),GO:0003824-catalytic activity(L=1),GO:0004553-hydrolase activity, hydrolyzing O-glycosyl compounds(L=4),GO:0004567-beta-mannosidase activity(L=6),GO:0005488-binding(L=1),GO:0015923-mannosidase activity(L=5),GO:0016787-hydrolase activity(L=2),GO:0016798-hydrolase activity, acting on glycosyl bonds(L=3),GO:0016985-mannan endo-1,4-be…	GO:0071704-organic substance metabolic process(L=2),		GO:0004553-hydrolase activity, hydrolyzing O-glycosyl compounds(L=4),		IPR001547(Glycoside hydrolase, family 5)	Pfam	PF00150(Cellulase (glycosyl hydrolase family 5))	2.9e-20
FC072V.10252.1	Complete	KAF5658625.1	99.6	543	2	0	1	543	1	543	0	100	KAF5658625.1 lactose permease [Fusarium circinatum]	fusarium circinatum	fusarium circinatum;fusarium fujikuroi species complex;fusarium;nectriaceae;hypocreales;hypocreomycetidae;sordariomycetes;sordariomyceta;leotiomyceta;pezizomycotina;saccharomyceta;ascomycota;dikarya;fungi;opisthokonta;eukaryota;cellular organisms;root	/LUSTRE/HOME/uva_dpvrf_1/uva_dpvrf_1_3/annotation/entap_outfiles/similarity_search/DIAMOND/blastp_transcripts_fc072v_final_nr.out	No	Yes							117187.FVEG_03462T0	0	1075.1	FG04676.1	Fungi	fuNOG[21]	03WS6@ascNOG,0PUEW@fuNOG,0SCDT@hypNOG,0XNQK@NOG,143BJ@opiNOG,1A5CA@sordNOG,KOG0254@euNOG		GO:0006810-transport(L=3),GO:0008150-biological_process(L=0),GO:0008643-carbohydrate transport(L=4),GO:0009987-cellular process(L=1),GO:0044699-single-organism process(L=1),GO:0044763-single-organism cellular process(L=2),GO:0044765-single-organism transport(L=3),GO:0051179-localization(L=1),GO:0051234-establishment of localization(L=2),GO:0055085-transmembrane transport(L=4),GO:0071702-organic s…	GO:0005575-cellular_component(L=0),GO:0016020-membrane(L=1),GO:0016021-integral component of membrane(L=4),GO:0031224-intrinsic component of membrane(L=3),GO:0044425-membrane part(L=2),	GO:0003674-molecular_function(L=0),GO:0005215-transporter activity(L=1),GO:0022857-transmembrane transporter activity(L=2),GO:0022891-substrate-specific transmembrane transporter activity(L=3),GO:0022892-substrate-specific transporter activity(L=2),	GO:0055085-transmembrane transport(L=4),	GO:0016021-integral component of membrane(L=4),	GO:0022857-transmembrane transporter activity(L=2),		IPR005828(Major facilitator, sugar transporter-like)	Pfam	PF00083(Sugar (and other) transporter)	1.4e-94
FC072V.10238.1	Partial 3 Prime	KAF4414933.1	36.2	520	305	12	1	505	453	960	1.8e-68	100	KAF4414933.1 hypothetical protein FACUT_13837 [Fusarium acutatum]	fusarium acutatum	fusarium acutatum;fusarium fujikuroi species complex;fusarium;nectriaceae;hypocreales;hypocreomycetidae;sordariomycetes;sordariomyceta;leotiomyceta;pezizomycotina;saccharomyceta;ascomycota;dikarya;fungi;opisthokonta;eukaryota;cellular organisms;root	/LUSTRE/HOME/uva_dpvrf_1/uva_dpvrf_1_3/annotation/entap_outfiles/similarity_search/DIAMOND/blastp_transcripts_fc072v_final_nr.out	No	No							5518.FGSG_11067P0	1e-19	103.6	FG11067.1	Fungi	fuNOG[21]	03PRR@ascNOG,0PKD8@fuNOG,0SFFD@hypNOG,0WW3P@necNOG,0XNP8@NOG,13MZM@opiNOG,19N1M@sordNOG,KOG0272@euNOG
FC072V.10241.1
FC072V.10740.1	Complete	KAF5661065.1	100	698	0	0	1	698	1	698	0	100	KAF5661065.1 glucose-repressible alcohol dehydrogenase transcriptional effector [Fusarium circinatum]	fusarium circinatum	fusarium circinatum;fusarium fujikuroi species complex;fusarium;nectriaceae;hypocreales;hypocreomycetidae;sordariomycetes;sordariomyceta;leotiomyceta;pezizomycotina;saccharomyceta;ascomycota;dikarya;fungi;opisthokonta;eukaryota;cellular organisms;root	/LUSTRE/HOME/uva_dpvrf_1/uva_dpvrf_1_3/annotation/entap_outfiles/similarity_search/DIAMOND/blastp_transcripts_fc072v_final_nr.out	No	Yes							5518.FGSG_02043P0	0	1175.2	CCR4	Fungi	fuNOG[21]	03KDR@ascNOG,0PHFH@fuNOG,0SG4A@hypNOG,0WZJ2@necNOG,12Q2X@opiNOG,19K20@sordNOG,COG4886@NOG,COG5239@NOG,KOG0620@euNOG	3018	GO:0000075-cell cycle checkpoint(L=5),GO:0000076-DNA replication checkpoint(L=7),GO:0000288-nuclear-transcribed mRNA catabolic process, deadenylation-dependent decay(L=8),GO:0000289-nuclear-transcribed mRNA poly(A) tail shortening(L=9),GO:0000956-nuclear-transcribed mRNA catabolic process(L=7),GO:0006139-nucleobase-containing compound metabolic process(L=3),GO:0006259-DNA metabolic process(L=4),G…	GO:0000428-DNA-directed RNA polymerase complex(L=5),GO:0000932-P-body(L=7),GO:0005575-cellular_component(L=0),GO:0005622-intracellular(L=3),GO:0005623-cell(L=1),GO:0005634-nucleus(L=5),GO:0005654-nucleoplasm(L=5),GO:0005737-cytoplasm(L=4),GO:0005829-cytosol(L=4),GO:0008023-transcription elongation factor complex(L=7),GO:0016591-DNA-directed RNA polymerase II, holoenzyme(L=7),GO:0016593-Cdc73/Paf1…	GO:0000175-3'-5'-exoribonuclease activity(L=7),GO:0003674-molecular_function(L=0),GO:0003676-nucleic acid binding(L=3),GO:0003723-RNA binding(L=4),GO:0003824-catalytic activity(L=1),GO:0004518-nuclease activity(L=4),GO:0004527-exonuclease activity(L=5),GO:0004532-exoribonuclease activity(L=6),GO:0004535-poly(A)-specific ribonuclease activity(L=8),GO:0004540-ribonuclease activity(L=5),GO:0005488-b…					IPR005135(Endonuclease/exonuclease/phosphatase)	Pfam	PF03372(Endonuclease/Exonuclease/phosphatase family)	1.2e-09
FC072V.10237.1	Internal	PNH43789.1	40.6	133	60	3	1	133	19	132	1.1e-09	99.3	PNH43789.1 hypothetical protein VD0003_g9565 [Verticillium dahliae]	verticillium dahliae	verticillium dahliae;verticillium;plectosphaerellaceae;glomerellales;hypocreomycetidae;sordariomycetes;sordariomyceta;leotiomyceta;pezizomycotina;saccharomyceta;ascomycota;dikarya;fungi;opisthokonta;eukaryota;cellular organisms;root	/LUSTRE/HOME/uva_dpvrf_1/uva_dpvrf_1_3/annotation/entap_outfiles/similarity_search/DIAMOND/blastp_transcripts_fc072v_final_nr.out	No	No							5507.FOXG_03964P0	1.3e-65	254.2	FG02336.1	Fungi	fuNOG[21]	03UFI@ascNOG,0J1FN@euNOG,0PRAW@fuNOG,0SIZY@hypNOG,0ZMCM@NOG,13UJM@opiNOG,19RU6@sordNOG		GO:0006355-regulation of transcription, DNA-templated(L=7),GO:0008150-biological_process(L=0),GO:0009889-regulation of biosynthetic process(L=4),GO:0010468-regulation of gene expression(L=5),GO:0010556-regulation of macromolecule biosynthetic process(L=5),GO:0019219-regulation of nucleobase-containing compound metabolic process(L=5),GO:0019222-regulation of metabolic process(L=3),GO:0031323-regul…		GO:0001071-nucleic acid binding transcription factor activity(L=1),GO:0003674-molecular_function(L=0),GO:0003676-nucleic acid binding(L=3),GO:0003677-DNA binding(L=4),GO:0003700-transcription factor activity, sequence-specific DNA binding(L=2),GO:0005488-binding(L=1),GO:0043565-sequence-specific DNA binding(L=5),GO:0097159-organic cyclic compound binding(L=2),GO:1901363-heterocyclic compound bind…
FC072V.10233.1
FC072V.10227.1	Complete	KPA41008.1	99.2	521	4	0	1	521	1	521	1.8e-297	100	KPA41008.1 utp-glucose-1-phosphate uridylyltransferase [Fusarium langsethiae]	fusarium langsethiae	fusarium langsethiae;fusarium sambucinum species complex;fusarium;nectriaceae;hypocreales;hypocreomycetidae;sordariomycetes;sordariomyceta;leotiomyceta;pezizomycotina;saccharomyceta;ascomycota;dikarya;fungi;opisthokonta;eukaryota;cellular organisms;root	/LUSTRE/HOME/uva_dpvrf_1/uva_dpvrf_1_3/annotation/entap_outfiles/similarity_search/DIAMOND/blastp_transcripts_fc072v_final_nr.out	No	Yes							5507.FOXG_00536P0	1.1e-298	1030.4	UGP1	Fungi	fuNOG[21]	03MP8@ascNOG,0PIQZ@fuNOG,0SAC4@hypNOG,12RPI@opiNOG,19MN5@sordNOG,COG4284@NOG,KOG2638@euNOG	40,52,500,520,1100,1110	GO:0000271-polysaccharide biosynthetic process(L=5),GO:0005975-carbohydrate metabolic process(L=3),GO:0005976-polysaccharide metabolic process(L=4),GO:0005977-glycogen metabolic process(L=4),GO:0005978-glycogen biosynthetic process(L=5),GO:0005984-disaccharide metabolic process(L=3),GO:0005991-trehalose metabolic process(L=4),GO:0005992-trehalose biosynthetic process(L=7),GO:0006011-UDP-glucose m…	GO:0005575-cellular_component(L=0),GO:0005622-intracellular(L=3),GO:0005623-cell(L=1),GO:0005634-nucleus(L=5),GO:0005737-cytoplasm(L=4),GO:0005829-cytosol(L=4),GO:0005886-plasma membrane(L=3),GO:0016020-membrane(L=1),GO:0043226-organelle(L=1),GO:0043227-membrane-bounded organelle(L=2),GO:0043229-intracellular organelle(L=3),GO:0043231-intracellular membrane-bounded organelle(L=4),GO:0044424-intra…	GO:0003674-molecular_function(L=0),GO:0003824-catalytic activity(L=1),GO:0003983-UTP:glucose-1-phosphate uridylyltransferase activity(L=7),GO:0005488-binding(L=1),GO:0016740-transferase activity(L=2),GO:0016772-transferase activity, transferring phosphorus-containing groups(L=3),GO:0016779-nucleotidyltransferase activity(L=4),GO:0043167-ion binding(L=2),GO:0043169-cation binding(L=3),GO:0046872-m…			GO:0070569-uridylyltransferase activity(L=5),		IPR002618(UDPGP family)	Pfam	PF01704(UTP--glucose-1-phosphate uridylyltransferase)	3.6e-191
[truncated: 11,782 more rows]

## Sheet: Table S6
Table S6: PHI-base alignments for the Fusarium circinatum transcriptome
Query Seq	ProteinID	PHI_MolConn_ID	Gene_name	Pathogen_NCBI_species_Taxonomy ID	Pathogen_species	Phenotype_of_mutant	Percent Identical	Alignment Length	Mismatches	Gap Openings	Query Start	Query End	Subject Start	Subject End	E Value	bitscore
FC072V.3.1	I1RFH1	PHI:1836	GzZC151	5518	Fusarium_graminearum	unaffected_pathogenicity	47.8	115	60	0	20	364	1	115	9.3e-32	131.7
FC072V.3.1	I1RGU2	PHI:1899	GzZC214	5518	Fusarium_graminearum	unaffected_pathogenicity	69.4	62	19	0	164	349	103	164	4e-19	89.7
FC072V.10.1	W7N2B4	PHI:3381	FVEG_12533	117187	Fusarium_verticillioides	unaffected_pathogenicity	45.5	508	275	2	74	1594	37	543	1.3e-134	475.7
[truncated: 5,900 more rows]

## Sheet: Table S7
	Table S7: Significantly enriched GO terms identified from differentially expressed P. pinea genes.
[truncated: 484 more rows]

[truncated: 8 more sheets: Table S8, Table S9, Table S10, Table S11, Table S12, Table S13, Table S14, Table S15]
